# Supplementary material
Source: Research Square preprint supplement (doi:10.21203/rs.3.rs-7925269/v1)
Supplement: Supplementary file 1 [file 9922103a253e4f50737e8208.xlsx]

## Sheet: S1-1 functional annotation
Table S1-1: Functional annotation of V. leiocarpa genes based on alignment of the representative protein set (longest isoform per gene) to the eggNOG database.
query	seed_ortholog	evalue	score	eggNOG_OGs	max_annot_lvl	COG_category	Description	Preferred_name	GOs	EC	KEGG_ko	KEGG_Pathway	KEGG_Module	KEGG_Reaction	KEGG_rclass	BRITE	KEGG_TC	CAZy	BiGG_Reaction	PFAMs
VLG1_000295	90675.XP_010435383.1	8.94e-155	454	KOG1339@1|root,KOG1339@2759|Eukaryota,37HJ1@33090|Viridiplantae,3G9V4@35493|Streptophyta,3HRM2@3699|Brassicales	35493|Streptophyta	O	Belongs to the peptidase A1 family	-	GO:0003674,GO:0003824,GO:0004175,GO:0004190,GO:0005575,GO:0005576,GO:0006508,GO:0006807,GO:0006950,GO:0006952,GO:0008150,GO:0008152,GO:0008233,GO:0009056,GO:0009057,GO:0009605,GO:0009607,GO:0009617,GO:0010310,GO:0010337,GO:0010565,GO:0010817,GO:0016787,GO:0019222,GO:0019538,GO:0030163,GO:0031323,GO:0032350,GO:0042742,GO:0043170,GO:0043207,GO:0044238,GO:0048046,GO:0050789,GO:0050794,GO:0050896,GO:…	3.4.23.25,3.4.23.5	ko:K01379,ko:K01381	ko04071,ko04138,ko04140,ko04142,ko04210,ko04915,ko05152,map04071,map04138,map04140,map04142,map04210,map04915,map05152	-	-	-	ko00000,ko00001,ko01000,ko01002,ko04147	-	-	-	TAXi_C,TAXi_N
VLG1_001591	3656.XP_008452845.1	1.77e-49	160	2CGNC@1|root,2S3MA@2759|Eukaryota,37W2S@33090|Viridiplantae,3GKH3@35493|Streptophyta,4JQGM@91835|fabids	35493|Streptophyta	-	-	-	-	-	-	-	-	-	-	-	-	-	-	-
VLG1_001110	3641.EOY14486	5.91e-15	73.2	2E8YR@1|root,2SFD6@2759|Eukaryota,37XCN@33090|Viridiplantae,3GR01@35493|Streptophyta	35493|Streptophyta	T	EF-hand, calcium binding motif	-	-	-	-	-	-	-	-	-	-	-	-	EF-hand_1,EF-hand_5
VLG1_000253	42345.XP_008810922.1	5.79e-29	114	COG1131@1|root,KOG0065@2759|Eukaryota,37P62@33090|Viridiplantae,3GB0P@35493|Streptophyta	33090|Viridiplantae	Q	Belongs to the ABC transporter superfamily. ABCG family. PDR (TC 3.A.1.205) subfamily	-	-	-	-	-	-	-	-	-	-	-	-	ABC2_membrane,ABC_tran,ABC_trans_N,PDR_assoc
VLG1_002063	29760.VIT_04s0008g05200.t01	6.16e-14	70.1	2D0GG@1|root,2SE4I@2759|Eukaryota,381Q5@33090|Viridiplantae,3GMSN@35493|Streptophyta	35493|Streptophyta	S	Domain of unknown function (DUF4666)	-	-	-	-	-	-	-	-	-	-	-	-	DUF4666
VLG1_001188	981085.XP_010095523.1	7.03e-135	397	KOG1729@1|root,KOG1729@2759|Eukaryota,37I2W@33090|Viridiplantae,3G9RD@35493|Streptophyta,4JFYM@91835|fabids	35493|Streptophyta	S	Protein present in Fab1, YOTB, Vac1, and EEA1	-	GO:0005575,GO:0005622,GO:0005623,GO:0005737,GO:0005768,GO:0006950,GO:0006970,GO:0006972,GO:0006979,GO:0008150,GO:0009266,GO:0009408,GO:0009628,GO:0012505,GO:0030139,GO:0031410,GO:0031982,GO:0043226,GO:0043227,GO:0043229,GO:0044352,GO:0044354,GO:0044424,GO:0044444,GO:0044464,GO:0045335,GO:0050896,GO:0097708	-	-	-	-	-	-	-	-	-	-	FYVE,PTB
VLG1_001186	3760.EMJ23920	2.36e-22	98.6	KOG3029@1|root,KOG3029@2759|Eukaryota,37KV2@33090|Viridiplantae,3GD46@35493|Streptophyta,4JJXU@91835|fabids	35493|Streptophyta	O	Prostaglandin E synthase	-	GO:0003674,GO:0003824,GO:0005488,GO:0016829,GO:0020037,GO:0033218,GO:0042277,GO:0043167,GO:0043168,GO:0043295,GO:0046906,GO:0048037,GO:0072341,GO:0097159,GO:1900750,GO:1901363,GO:1901681	5.3.99.3	ko:K05309	ko00590,ko01100,map00590,map01100	-	R02265	RC00672	ko00000,ko00001,ko01000	-	-	-	GST_C,GST_N_3
VLG1_000150	3694.POPTR_0018s00450.1	1.06e-61	208	COG3104@1|root,KOG1237@2759|Eukaryota,37RFH@33090|Viridiplantae,3GEN5@35493|Streptophyta,4JEB5@91835|fabids	35493|Streptophyta	E	POT family	-	-	-	ko:K14638	-	-	-	-	ko00000,ko02000	2.A.17.3	-	-	PTR2
VLG1_001963	3750.XP_008373619.1	0	1260	KOG1075@1|root,KOG1075@2759|Eukaryota,37SMH@33090|Viridiplantae,3GC2J@35493|Streptophyta,4JJ1F@91835|fabids	35493|Streptophyta	S	Mitochondrial protein	-	GO:0000373,GO:0000375,GO:0000377,GO:0000959,GO:0000963,GO:0005575,GO:0005622,GO:0005623,GO:0005737,GO:0005739,GO:0006139,GO:0006396,GO:0006397,GO:0006725,GO:0006807,GO:0006996,GO:0007005,GO:0008150,GO:0008152,GO:0008380,GO:0009987,GO:0010467,GO:0016043,GO:0016070,GO:0016071,GO:0034641,GO:0043170,GO:0043226,GO:0043227,GO:0043229,GO:0043231,GO:0044237,GO:0044238,GO:0044424,GO:0044444,GO:0044464,GO:…	-	-	-	-	-	-	-	-	-	-	Intron_maturas2,RVT_1
VLG1_001948	3760.EMJ20027	1.03e-17	80.9	COG4886@1|root,KOG0619@2759|Eukaryota,37JQI@33090|Viridiplantae	33090|Viridiplantae	G	LRR receptor-like serine threonine-protein kinase	-	GO:0000003,GO:0001704,GO:0001706,GO:0003006,GO:0005575,GO:0005618,GO:0005623,GO:0005886,GO:0006810,GO:0006833,GO:0006950,GO:0007275,GO:0007369,GO:0007389,GO:0007492,GO:0008104,GO:0008150,GO:0009505,GO:0009531,GO:0009611,GO:0009653,GO:0009790,GO:0009791,GO:0009793,GO:0009798,GO:0009888,GO:0009987,GO:0010154,GO:0010453,GO:0010470,GO:0016020,GO:0022414,GO:0022603,GO:0030104,GO:0030154,GO:0030312,GO:…	-	-	-	-	-	-	-	-	-	-	LRRNT_2,LRR_1,LRR_6,LRR_8
VLG1_001929	57918.XP_004292507.1	8.77e-23	95.1	2CY9C@1|root,2S2XR@2759|Eukaryota,37VNH@33090|Viridiplantae,3GJC1@35493|Streptophyta,4JQRB@91835|fabids	35493|Streptophyta	S	MRN-interacting protein	-	-	-	-	-	-	-	-	-	-	-	-	MRNIP
VLG1_001902	981085.XP_010104551.1	0	1017	KOG4658@1|root,KOG4658@2759|Eukaryota,37JN7@33090|Viridiplantae,3GAV6@35493|Streptophyta,4JTMF@91835|fabids	35493|Streptophyta	T	NB-ARC domain	-	-	-	-	-	-	-	-	-	-	-	-	NB-ARC
VLG1_001565	102107.XP_008220641.1	1.75e-79	245	29BAJ@1|root,2RZFC@2759|Eukaryota,37V51@33090|Viridiplantae,3GJ55@35493|Streptophyta,4JUDQ@91835|fabids	35493|Streptophyta	S	VQ motif	-	-	-	-	-	-	-	-	-	-	-	-	VQ
VLG1_001520	3750.XP_008393610.1	5.19e-264	737	KOG4585@1|root,KOG4585@2759|Eukaryota,37KD8@33090|Viridiplantae,3G8UF@35493|Streptophyta,4JFAE@91835|fabids	35493|Streptophyta	L	DDE superfamily endonuclease	-	-	-	-	-	-	-	-	-	-	-	-	DDE_Tnp_4
VLG1_002240	3760.EMJ19242	5.08e-58	194	COG0515@1|root,KOG1187@2759|Eukaryota,37IP7@33090|Viridiplantae,3G8RT@35493|Streptophyta,4JI6U@91835|fabids	35493|Streptophyta	T	Belongs to the protein kinase superfamily	-	-	-	-	-	-	-	-	-	-	-	-	Pkinase,Pkinase_Tyr
VLG1_002233	981085.XP_010089778.1	2.76e-118	355	KOG0800@1|root,KOG0800@2759|Eukaryota,37N38@33090|Viridiplantae,3GCM3@35493|Streptophyta,4JMJE@91835|fabids	35493|Streptophyta	O	E3 ubiquitin-protein ligase	-	GO:0003674,GO:0003824,GO:0004842,GO:0006464,GO:0006508,GO:0006511,GO:0006807,GO:0008150,GO:0008152,GO:0009056,GO:0009057,GO:0009987,GO:0010498,GO:0016567,GO:0016740,GO:0019538,GO:0019787,GO:0019941,GO:0030163,GO:0032446,GO:0036211,GO:0043161,GO:0043170,GO:0043412,GO:0043632,GO:0044237,GO:0044238,GO:0044248,GO:0044257,GO:0044260,GO:0044265,GO:0044267,GO:0051603,GO:0061630,GO:0061659,GO:0070647,GO:…	2.3.2.27	ko:K10663	-	-	-	-	ko00000,ko01000,ko04121	-	-	-	zf-RING_2
VLG1_002229	29760.VIT_15s0021g00620.t01	2.24e-34	126	2DD7P@1|root,2S5MH@2759|Eukaryota,37W7F@33090|Viridiplantae,3GKHP@35493|Streptophyta	35493|Streptophyta	S	Conserved gene of	-	-	-	-	-	-	-	-	-	-	-	-	-
VLG1_001360	3760.EMJ26095	1.21e-42	156	COG5059@1|root,KOG0242@2759|Eukaryota,37JWB@33090|Viridiplantae,3GDGJ@35493|Streptophyta,4JN74@91835|fabids	35493|Streptophyta	Z	Belongs to the TRAFAC class myosin-kinesin ATPase superfamily. Kinesin family	-	GO:0000226,GO:0000278,GO:0000280,GO:0003674,GO:0003774,GO:0003777,GO:0003824,GO:0005575,GO:0005622,GO:0005623,GO:0005856,GO:0005871,GO:0005875,GO:0006928,GO:0006996,GO:0007010,GO:0007017,GO:0007018,GO:0007049,GO:0007051,GO:0007052,GO:0007059,GO:0008150,GO:0008574,GO:0009987,GO:0015630,GO:0016043,GO:0016462,GO:0016787,GO:0016817,GO:0016818,GO:0016887,GO:0017111,GO:0022402,GO:0022607,GO:0032991,GO:…	-	ko:K10401	-	-	-	-	ko00000,ko04812	-	-	-	Kinesin
VLG1_001342	981085.XP_010090401.1	3.33e-76	231	2AUGM@1|root,2RZU3@2759|Eukaryota,37UNI@33090|Viridiplantae,3GISG@35493|Streptophyta,4JQB1@91835|fabids	35493|Streptophyta	S	Belongs to the complex I LYR family	-	-	-	-	-	-	-	-	-	-	-	-	Complex1_LYR
VLG1_000506	2711.XP_006472361.1	2.65e-28	107	2CYW8@1|root,2S6UG@2759|Eukaryota,37X1D@33090|Viridiplantae,3GKTK@35493|Streptophyta	35493|Streptophyta	J	50S ribosomal protein 6	-	GO:0005575,GO:0005622,GO:0005623,GO:0005737,GO:0009507,GO:0009536,GO:0043226,GO:0043227,GO:0043229,GO:0043231,GO:0044424,GO:0044444,GO:0044464	-	ko:K19035	-	-	-	-	br01610,ko00000,ko03011	-	-	-	DUF5323
VLG1_001828	29760.VIT_12s0142g00780.t01	1.59e-23	95.1	COG4886@1|root,2QQYD@2759|Eukaryota,37P0C@33090|Viridiplantae,3G8IW@35493|Streptophyta	35493|Streptophyta	T	LRR receptor-like serine threonine-protein kinase	-	-	-	-	-	-	-	-	-	-	-	-	LRRNT_2,LRR_1,LRR_6,LRR_8,Pkinase
VLG1_000892_VLG1_000893	3694.POPTR_0006s28390.1	2.41e-21	90.1	KOG1052@1|root,KOG1052@2759|Eukaryota	2759|Eukaryota	U	ionotropic glutamate receptor activity	-	-	-	ko:K05313,ko:K05387	-	-	-	-	ko00000,ko04040	1.A.10.1.10,1.A.10.1.14,1.A.10.1.15,1.A.10.1.16,1.A.10.1.17,1.A.10.1.18,1.A.10.1.7	-	-	ANF_receptor,Lig_chan,Lig_chan-Glu_bd,SBP_bac_3
VLG1_000952	29730.Gorai.001G021900.1	4.83e-09	61.6	2E0W2@1|root,2S89H@2759|Eukaryota,37WPT@33090|Viridiplantae,3GKQY@35493|Streptophyta	35493|Streptophyta	S	leucine-rich repeat extensin-like protein	-	-	-	-	-	-	-	-	-	-	-	-	-
VLG1_000940	3656.XP_008445597.1	3.47e-17	84.7	COG0666@1|root,KOG0504@2759|Eukaryota,37KPV@33090|Viridiplantae,3GH3Z@35493|Streptophyta,4JHPX@91835|fabids	35493|Streptophyta	S	ankyrin repeat-containing protein	-	-	-	-	-	-	-	-	-	-	-	-	Ank_2,Ank_3,Ank_4,PGG
VLG1_001445	29760.VIT_18s0001g09510.t01	1.62e-126	380	COG2124@1|root,KOG0156@2759|Eukaryota,37HKM@33090|Viridiplantae,3G7FU@35493|Streptophyta	35493|Streptophyta	Q	Belongs to the cytochrome P450 family	-	GO:0003674,GO:0003824,GO:0004497,GO:0005575,GO:0006082,GO:0006725,GO:0006790,GO:0006807,GO:0006950,GO:0006952,GO:0008150,GO:0008152,GO:0009058,GO:0009605,GO:0009607,GO:0009987,GO:0016020,GO:0016143,GO:0016491,GO:0016705,GO:0016709,GO:0019748,GO:0019757,GO:0019760,GO:0034641,GO:0042343,GO:0042430,GO:0043207,GO:0043436,GO:0044237,GO:0044281,GO:0044550,GO:0046483,GO:0050896,GO:0051704,GO:0051707,GO:…	1.14.13.53,1.14.13.89,1.14.14.19,1.14.14.32	ko:K00512,ko:K13260,ko:K20623	ko00140,ko00905,ko00943,ko01100,ko01110,ko04913,ko04917,ko04927,ko04934,map00140,map00905,map00943,map01100,map01110,map04913,map04917,map04927,map04934	M00109,M00110	R02211,R03783,R04852,R04853,R06560,R06561,R06606,R06607,R07371,R07470,R07474,R07746,R08517,R08518	RC00046,RC00607,RC00660,RC00661,RC00923,RC01222	ko00000,ko00001,ko00002,ko00199,ko01000	-	-	-	p450
VLG1_001895	102107.XP_008237835.1	3.51e-133	391	COG0657@1|root,KOG1515@2759|Eukaryota,37KMI@33090|Viridiplantae,3GBJJ@35493|Streptophyta,4JT7I@91835|fabids	35493|Streptophyta	V	Carboxylesterase	-	-	-	ko:K14493	ko04075,map04075	-	-	-	ko00000,ko00001,ko01000	-	-	-	Abhydrolase_3
VLG1_001884	2711.XP_006472381.1	2.03e-80	242	KOG3357@1|root,KOG3357@2759|Eukaryota,37IDW@33090|Viridiplantae,3GF02@35493|Streptophyta	35493|Streptophyta	S	E2-like enzyme which forms an intermediate with UFM1 via a thioester linkage	-	GO:0003674,GO:0003824,GO:0005575,GO:0005622,GO:0005623,GO:0005737,GO:0006464,GO:0006807,GO:0008150,GO:0008152,GO:0009987,GO:0016740,GO:0019538,GO:0019787,GO:0032446,GO:0036211,GO:0043170,GO:0043412,GO:0044237,GO:0044238,GO:0044260,GO:0044267,GO:0044424,GO:0044464,GO:0070647,GO:0071568,GO:0071569,GO:0071704,GO:0140096,GO:1901564,GO:1990564,GO:1990592	-	ko:K12165	-	-	-	-	ko00000,ko04121	-	-	-	UFC1
VLG1_000544	981085.XP_010086656.1	3.19e-21	97.8	COG0165@1|root,KOG1316@2759|Eukaryota,37J59@33090|Viridiplantae,3G9I5@35493|Streptophyta,4JHE2@91835|fabids	35493|Streptophyta	E	Argininosuccinate lyase	-	GO:0003674,GO:0003824,GO:0004056,GO:0005575,GO:0005622,GO:0005623,GO:0005737,GO:0006082,GO:0006520,GO:0006525,GO:0006526,GO:0006591,GO:0006807,GO:0008150,GO:0008152,GO:0008652,GO:0009058,GO:0009064,GO:0009084,GO:0009507,GO:0009532,GO:0009536,GO:0009570,GO:0009987,GO:0016053,GO:0016829,GO:0016840,GO:0016842,GO:0019752,GO:0042450,GO:0043226,GO:0043227,GO:0043229,GO:0043231,GO:0043436,GO:0044237,GO:…	4.3.2.1	ko:K01755	ko00220,ko00250,ko01100,ko01110,ko01130,ko01230,map00220,map00250,map01100,map01110,map01130,map01230	M00029,M00844,M00845	R01086	RC00445,RC00447	ko00000,ko00001,ko00002,ko01000,ko04147	-	-	-	ASL_C2,Lyase_1
VLG1_000528	3750.XP_008364590.1	1.58e-29	117	COG2084@1|root,KOG0409@2759|Eukaryota,37KS0@33090|Viridiplantae,3G856@35493|Streptophyta,4JJD0@91835|fabids	35493|Streptophyta	I	3-hydroxyisobutyrate dehydrogenase-like	-	-	-	-	-	-	-	-	-	-	-	-	NAD_binding_11,NAD_binding_2
VLG1_001254	3656.XP_008464800.1	2.26e-143	429	COG1257@1|root,KOG2480@2759|Eukaryota,37MBQ@33090|Viridiplantae,3G7H8@35493|Streptophyta,4JFFM@91835|fabids	35493|Streptophyta	I	A reductase	-	GO:0003674,GO:0003824,GO:0004420,GO:0005575,GO:0005622,GO:0005623,GO:0005737,GO:0005739,GO:0005740,GO:0005777,GO:0005778,GO:0005783,GO:0005789,GO:0006629,GO:0006694,GO:0006720,GO:0008150,GO:0008152,GO:0008202,GO:0008299,GO:0008610,GO:0009058,GO:0009526,GO:0009536,GO:0009987,GO:0012505,GO:0016020,GO:0016125,GO:0016126,GO:0016491,GO:0016614,GO:0016616,GO:0031090,GO:0031903,GO:0031966,GO:0031967,GO:…	1.1.1.34	ko:K00021	ko00900,ko01100,ko01110,ko01130,ko04152,ko04976,map00900,map01100,map01110,map01130,map04152,map04976	M00095	R02082	RC00004,RC00644	ko00000,ko00001,ko00002,ko01000	-	-	-	HMG-CoA_red
VLG1_001252	90675.XP_010495348.1	1.55e-25	102	COG0260@1|root,COG0451@1|root,KOG1430@2759|Eukaryota,KOG2597@2759|Eukaryota,37NT7@33090|Viridiplantae,3GCCB@35493|Streptophyta,3HSSZ@3699|Brassicales	33090|Viridiplantae	EI	3-beta hydroxysteroid dehydrogenase isomerase family protein	-	-	-	-	-	-	-	-	-	-	-	-	3Beta_HSD,DUF4499
VLG1_001247	3983.cassava4.1_016910m	2.47e-86	261	KOG0800@1|root,KOG0800@2759|Eukaryota,37UYJ@33090|Viridiplantae,3GHYA@35493|Streptophyta,4JP87@91835|fabids	35493|Streptophyta	O	RING-H2 finger protein	-	GO:0003674,GO:0003824,GO:0004842,GO:0005575,GO:0005623,GO:0005886,GO:0006464,GO:0006508,GO:0006511,GO:0006807,GO:0006950,GO:0008150,GO:0008152,GO:0009056,GO:0009057,GO:0009266,GO:0009409,GO:0009628,GO:0009909,GO:0009987,GO:0010033,GO:0010200,GO:0010243,GO:0010498,GO:0010966,GO:0016020,GO:0016567,GO:0016740,GO:0019538,GO:0019787,GO:0019941,GO:0030163,GO:0032446,GO:0032879,GO:0033554,GO:0036211,GO:…	-	-	-	-	-	-	-	-	-	-	zf-RING_2
VLG1_001723	57918.XP_004290883.1	0	1454	KOG0167@1|root,KOG0167@2759|Eukaryota,37IQG@33090|Viridiplantae,3G7WJ@35493|Streptophyta,4JDIG@91835|fabids	35493|Streptophyta	S	Protein kinase C conserved region 2 (CalB)	-	GO:0000271,GO:0000902,GO:0002682,GO:0002683,GO:0003674,GO:0003824,GO:0004842,GO:0005102,GO:0005488,GO:0005515,GO:0005575,GO:0005622,GO:0005623,GO:0005634,GO:0005737,GO:0005829,GO:0005856,GO:0005874,GO:0005881,GO:0005886,GO:0005938,GO:0005975,GO:0005976,GO:0006073,GO:0006464,GO:0006807,GO:0006950,GO:0006952,GO:0008104,GO:0008150,GO:0008152,GO:0009058,GO:0009059,GO:0009250,GO:0009605,GO:0009607,GO:…	-	-	-	-	-	-	-	-	-	-	Arm,C2
VLG1_000860	3885.XP_007161071.1	4.5e-85	271	COG0515@1|root,2R5Z1@2759|Eukaryota,37M7Q@33090|Viridiplantae,3GNXC@35493|Streptophyta,4JECG@91835|fabids	35493|Streptophyta	T	L-type lectin-domain containing receptor kinase IX.1-like	-	-	-	-	-	-	-	-	-	-	-	-	Lectin_legB,Pkinase
VLG1_000864	946362.XP_004994341.1	8.38e-13	67.8	KOG2863@1|root,KOG2863@2759|Eukaryota,38B4T@33154|Opisthokonta	33154|Opisthokonta	A	RNA lariat debranching enzyme activity	DBR1	GO:0000375,GO:0000377,GO:0000398,GO:0003674,GO:0003824,GO:0004518,GO:0004519,GO:0004521,GO:0004540,GO:0005575,GO:0005622,GO:0005623,GO:0005634,GO:0005654,GO:0006139,GO:0006396,GO:0006397,GO:0006401,GO:0006725,GO:0006807,GO:0007124,GO:0008150,GO:0008152,GO:0008380,GO:0008419,GO:0009056,GO:0009057,GO:0009987,GO:0010467,GO:0016049,GO:0016070,GO:0016071,GO:0016074,GO:0016787,GO:0016788,GO:0016891,GO:…	-	ko:K18328	-	-	-	-	ko00000,ko01000,ko03009	-	-	-	DBR1,Metallophos
VLG1_000421	225117.XP_009345937.1	2.36e-109	332	KOG0032@1|root,KOG0032@2759|Eukaryota,37JJW@33090|Viridiplantae,3GAF7@35493|Streptophyta,4JEFC@91835|fabids	35493|Streptophyta	T	Calcium-dependent protein kinase	-	GO:0001558,GO:0003674,GO:0003824,GO:0004672,GO:0004674,GO:0004683,GO:0005488,GO:0005515,GO:0005516,GO:0005575,GO:0005622,GO:0005623,GO:0005634,GO:0005737,GO:0005829,GO:0005886,GO:0006464,GO:0006468,GO:0006793,GO:0006796,GO:0006807,GO:0007154,GO:0007165,GO:0008150,GO:0008152,GO:0009787,GO:0009789,GO:0009931,GO:0009966,GO:0009967,GO:0009987,GO:0010646,GO:0010647,GO:0010769,GO:0010857,GO:0010959,GO:…	2.7.11.1	ko:K13412	ko04626,ko05145,map04626,map05145	-	-	-	ko00000,ko00001,ko01000,ko01001	-	-	-	EF-hand_1,EF-hand_5,EF-hand_6,Pkinase
VLG1_000415	59689.fgenesh2_kg.2__1479__AT1G72170.1	1.38e-18	81.3	KOG4604@1|root,KOG4604@2759|Eukaryota,37W14@33090|Viridiplantae,3GK2N@35493|Streptophyta,3HUQZ@3699|Brassicales	35493|Streptophyta	S	Domain of unknown function (DUF543)	-	-	-	ko:K17784	-	-	-	-	ko00000,ko03029	-	-	-	DUF543
VLG1_000401	3694.POPTR_0019s10880.1	6.2e-23	92	COG3104@1|root,KOG1237@2759|Eukaryota,37IP8@33090|Viridiplantae,3G9AW@35493|Streptophyta,4JRE2@91835|fabids	35493|Streptophyta	E	Protein NRT1 PTR FAMILY 5.10-like	-	-	-	ko:K14638	-	-	-	-	ko00000,ko02000	2.A.17.3	-	-	PTR2
VLG2_001629	3760.EMJ02773	3.64e-58	221	KOG4658@1|root,KOG4658@2759|Eukaryota,37M9S@33090|Viridiplantae,3GHTE@35493|Streptophyta,4JS5A@91835|fabids	35493|Streptophyta	T	disease resistance	-	-	-	ko:K15078	ko03460,map03460	-	-	-	ko00000,ko00001,ko01000,ko03400	-	-	-	LRR_8,NB-ARC
VLG2_000726	981085.XP_010096782.1	7.31e-304	856	COG0515@1|root,2QTX3@2759|Eukaryota,37QMV@33090|Viridiplantae,3G7RI@35493|Streptophyta,4JGIP@91835|fabids	35493|Streptophyta	T	L-type lectin-domain containing receptor kinase IX.1-like	-	GO:0002229,GO:0002239,GO:0005575,GO:0005623,GO:0005886,GO:0006950,GO:0006952,GO:0008150,GO:0009605,GO:0009607,GO:0009893,GO:0010310,GO:0010726,GO:0010941,GO:0010942,GO:0016020,GO:0019222,GO:0031323,GO:0031325,GO:0043207,GO:0044464,GO:0048518,GO:0048522,GO:0050789,GO:0050794,GO:0050896,GO:0051193,GO:0051194,GO:0051704,GO:0051707,GO:0065007,GO:0071944,GO:0098542,GO:2000377,GO:2000379	2.7.11.1	ko:K04730,ko:K04733	ko04010,ko04064,ko04620,ko04621,ko04624,ko04722,ko05133,ko05140,ko05142,ko05145,ko05152,ko05162,ko05164,ko05169,map04010,map04064,map04620,map04621,map04624,map04722,map05133,map05140,map05142,map05145,map05152,map05162,map05164,map05169	M00686	-	-	ko00000,ko00001,ko00002,ko01000,ko01001	-	-	-	Lectin_legB,Pkinase,Pkinase_Tyr
VLG2_002151	981085.XP_010112466.1	9.47e-195	553	KOG2076@1|root,KOG2076@2759|Eukaryota,37S36@33090|Viridiplantae,3GAHF@35493|Streptophyta,4JJI2@91835|fabids	35493|Streptophyta	K	General transcription factor 3C polypeptide	-	-	-	ko:K15201	-	-	-	-	ko00000,ko03021	-	-	-	TPR_16,TPR_19,TPR_6,TPR_7,TPR_8
VLG2_000353	3760.EMJ01310	1.35e-39	134	2CYEX@1|root,2S4NX@2759|Eukaryota,37WHQ@33090|Viridiplantae	33090|Viridiplantae	S	auxin-induced protein	-	-	-	ko:K14488	ko04075,map04075	-	-	-	ko00000,ko00001	-	-	-	Auxin_inducible
VLG2_001247	29730.Gorai.004G091300.1	2.43e-92	280	COG0596@1|root,KOG4178@2759|Eukaryota,37P84@33090|Viridiplantae,3G9C1@35493|Streptophyta	35493|Streptophyta	I	epoxide hydrolase	-	-	-	-	-	-	-	-	-	-	-	-	Abhydrolase_1,Abhydrolase_6
VLG2_002107	2711.XP_006486988.1	2.15e-131	377	28N64@1|root,2QURC@2759|Eukaryota,37NKR@33090|Viridiplantae,3GDPZ@35493|Streptophyta	35493|Streptophyta	S	Secretory protein	-	-	-	-	-	-	-	-	-	-	-	-	BSP
VLG2_001729	3641.EOX98560	5.81e-39	144	KOG2754@1|root,KOG2754@2759|Eukaryota,37IIA@33090|Viridiplantae,3GDZN@35493|Streptophyta	35493|Streptophyta	O	Essential subunit of the N-oligosaccharyl transferase (OST) complex which catalyzes the transfer of a high mannose oligosaccharide from a lipid-linked oligosaccharide donor to an asparagine residue within an Asn-X-Ser Thr consensus motif in nascent polypeptide chains	-	-	-	ko:K12670	ko00510,ko00513,ko01100,ko04141,map00510,map00513,map01100,map04141	M00072	-	-	ko00000,ko00001,ko00002	-	-	-	DDOST_48kD
VLG2_001720	85681.XP_006423218.1	1.03e-113	341	29D32@1|root,2RK6X@2759|Eukaryota,37T6M@33090|Viridiplantae,3G9EQ@35493|Streptophyta	35493|Streptophyta	S	Hydroxyproline-rich glycoprotein family protein	-	-	-	-	-	-	-	-	-	-	-	-	-
VLG2_000861	3847.GLYMA10G04550.1	3.07e-18	80.1	2E70I@1|root,2SDNK@2759|Eukaryota,37XKP@33090|Viridiplantae,3GMI9@35493|Streptophyta,4JR8W@91835|fabids	35493|Streptophyta	-	-	-	-	-	-	-	-	-	-	-	-	-	-	-
VLG2_000417	71139.XP_010028796.1	1.18e-63	205	KOG3223@1|root,KOG3223@2759|Eukaryota,37NW9@33090|Viridiplantae,3GBWS@35493|Streptophyta	35493|Streptophyta	S	Coiled-coil domain-containing protein	-	-	-	-	-	-	-	-	-	-	-	-	Ccdc124
VLG2_000894	981085.XP_010111922.1	4.92e-46	158	2E182@1|root,2S8K2@2759|Eukaryota,37XAM@33090|Viridiplantae,3GKPN@35493|Streptophyta,4JUN4@91835|fabids	35493|Streptophyta	-	-	-	-	-	-	-	-	-	-	-	-	-	-	DUF761
VLG2_000426	3750.XP_008382746.1	1.22e-30	114	2D2RM@1|root,2SNRQ@2759|Eukaryota,37ZQR@33090|Viridiplantae,3GPHA@35493|Streptophyta,4JTUE@91835|fabids	35493|Streptophyta	S	TMV resistance protein	-	-	-	-	-	-	-	-	-	-	-	-	TIR
VLG2_000804	3988.XP_002521092.1	3.21e-55	198	COG4886@1|root,KOG0619@2759|Eukaryota,37JQI@33090|Viridiplantae,3G814@35493|Streptophyta,4JK6I@91835|fabids	35493|Streptophyta	T	LRR receptor-like serine threonine-protein kinase	-	GO:0003674,GO:0003824,GO:0004672,GO:0004674,GO:0004675,GO:0004888,GO:0005575,GO:0005622,GO:0005623,GO:0005737,GO:0005768,GO:0005886,GO:0006464,GO:0006468,GO:0006793,GO:0006796,GO:0006807,GO:0006810,GO:0006897,GO:0006898,GO:0006950,GO:0006952,GO:0007154,GO:0007165,GO:0007166,GO:0007167,GO:0007178,GO:0008150,GO:0008152,GO:0009595,GO:0009605,GO:0009607,GO:0009617,GO:0009888,GO:0009987,GO:0010073,GO:…	-	-	-	-	-	-	-	-	-	-	LRRNT_2,LRR_1,LRR_6,LRR_8
VLG2_000075	3750.XP_008383309.1	3.64e-29	120	COG4886@1|root,KOG0619@2759|Eukaryota,37JQI@33090|Viridiplantae,3G97Z@35493|Streptophyta,4JSRM@91835|fabids	35493|Streptophyta	S	LRR receptor-like serine threonine-protein kinase	-	GO:0000003,GO:0003006,GO:0005575,GO:0005618,GO:0005623,GO:0007275,GO:0007389,GO:0008150,GO:0009505,GO:0009531,GO:0009553,GO:0009653,GO:0009790,GO:0009791,GO:0009793,GO:0009798,GO:0009888,GO:0010154,GO:0010453,GO:0022414,GO:0022603,GO:0030312,GO:0032501,GO:0032502,GO:0042659,GO:0044426,GO:0044462,GO:0044464,GO:0045595,GO:0048226,GO:0048229,GO:0048316,GO:0048608,GO:0048731,GO:0048856,GO:0050789,GO:…	-	-	-	-	-	-	-	-	-	-	LRRNT_2,LRR_1,LRR_4,LRR_6,LRR_8
VLG2_000077	29760.VIT_14s0171g00050.t01	4.53e-134	427	COG4886@1|root,KOG0619@2759|Eukaryota,37JQI@33090|Viridiplantae,3G97Z@35493|Streptophyta	35493|Streptophyta	Q	LRR receptor-like serine threonine-protein kinase	-	-	2.4.2.9	ko:K00761	ko00240,ko01100,map00240,map01100	-	R00966	RC00063	ko00000,ko00001,ko01000	-	-	-	LRRNT_2,LRR_1,LRR_6,LRR_8
VLG2_002251	29760.VIT_18s0157g00040.t01	1.69e-43	164	COG4886@1|root,KOG0619@2759|Eukaryota,37IH3@33090|Viridiplantae,3GGP1@35493|Streptophyta	35493|Streptophyta	B	receptor-like protein 12	-	-	-	-	-	-	-	-	-	-	-	-	LRRNT_2,LRR_1,LRR_6,LRR_8
VLG2_002243	3649.evm.model.supercontig_63.25	8.8e-46	162	COG0699@1|root,KOG0446@2759|Eukaryota,37MSI@33090|Viridiplantae,3GC6P@35493|Streptophyta,3HMFW@3699|Brassicales	35493|Streptophyta	U	Belongs to the TRAFAC class dynamin-like GTPase superfamily. Dynamin Fzo YdjA family	-	GO:0003674,GO:0003824,GO:0003924,GO:0005488,GO:0005515,GO:0005575,GO:0005622,GO:0005623,GO:0005737,GO:0005777,GO:0006996,GO:0007031,GO:0007623,GO:0008017,GO:0008092,GO:0008150,GO:0009507,GO:0009526,GO:0009527,GO:0009536,GO:0009657,GO:0009658,GO:0009707,GO:0009941,GO:0009987,GO:0010020,GO:0015631,GO:0016020,GO:0016043,GO:0016462,GO:0016559,GO:0016787,GO:0016817,GO:0016818,GO:0017111,GO:0019867,GO:…	-	-	-	-	-	-	-	-	-	-	Dynamin_N,WD40
VLG2_002288	3750.XP_008368447.1	1.55e-14	77.4	COG4886@1|root,KOG0619@2759|Eukaryota,37JQI@33090|Viridiplantae,3G97Z@35493|Streptophyta	35493|Streptophyta	Q	LRR receptor-like serine threonine-protein kinase	-	GO:0000003,GO:0001704,GO:0001706,GO:0003006,GO:0005575,GO:0005618,GO:0005623,GO:0005886,GO:0006810,GO:0006833,GO:0006950,GO:0007275,GO:0007369,GO:0007389,GO:0007492,GO:0008104,GO:0008150,GO:0009505,GO:0009531,GO:0009611,GO:0009653,GO:0009790,GO:0009791,GO:0009793,GO:0009798,GO:0009888,GO:0009987,GO:0010154,GO:0010453,GO:0010470,GO:0016020,GO:0022414,GO:0022603,GO:0030104,GO:0030154,GO:0030312,GO:…	-	-	-	-	-	-	-	-	-	-	LRRNT_2,LRR_1,LRR_6,LRR_8
VLG2_002284	981085.XP_010106115.1	9.24e-160	509	COG4886@1|root,KOG0619@2759|Eukaryota,37JQI@33090|Viridiplantae,3G97Z@35493|Streptophyta,4JS6J@91835|fabids	35493|Streptophyta	T	LRR receptor-like serine threonine-protein kinase	-	GO:0000003,GO:0001704,GO:0001706,GO:0003002,GO:0003006,GO:0003674,GO:0003824,GO:0004672,GO:0004674,GO:0004675,GO:0004888,GO:0005575,GO:0005618,GO:0005623,GO:0005886,GO:0006464,GO:0006468,GO:0006793,GO:0006796,GO:0006807,GO:0006810,GO:0006833,GO:0006950,GO:0007154,GO:0007165,GO:0007166,GO:0007167,GO:0007178,GO:0007275,GO:0007369,GO:0007389,GO:0007492,GO:0008104,GO:0008150,GO:0008152,GO:0009505,GO:…	-	-	-	-	-	-	-	-	-	-	LRRNT_2,LRR_1,LRR_6,LRR_8
VLG2_000481	981085.XP_010095587.1	2.97e-82	260	KOG1075@1|root,KOG1075@2759|Eukaryota,37K5Y@33090|Viridiplantae,3GD32@35493|Streptophyta,4JKAA@91835|fabids	35493|Streptophyta	S	Rhodanese-like domain-containing protein 4A	-	GO:0003674,GO:0003824,GO:0004553,GO:0004568,GO:0005488,GO:0005575,GO:0005576,GO:0005622,GO:0005623,GO:0005737,GO:0006022,GO:0006026,GO:0006030,GO:0006032,GO:0006040,GO:0006807,GO:0008061,GO:0008144,GO:0008150,GO:0008152,GO:0009056,GO:0009057,GO:0009507,GO:0009534,GO:0009535,GO:0009536,GO:0009579,GO:0009987,GO:0016020,GO:0016787,GO:0016798,GO:0017144,GO:0031976,GO:0031984,GO:0034357,GO:0042651,GO:…	-	-	-	-	-	-	-	-	-	-	-
VLG2_001795	225117.XP_009342022.1	0	1135	KOG4197@1|root,KOG4197@2759|Eukaryota,37JWE@33090|Viridiplantae,3GHM0@35493|Streptophyta,4JID0@91835|fabids	35493|Streptophyta	S	Pentatricopeptide repeat-containing protein	-	-	-	-	-	-	-	-	-	-	-	-	DYW_deaminase,PPR,PPR_2
VLG2_001343	102107.XP_008234921.1	6.64e-151	448	KOG2690@1|root,KOG2690@2759|Eukaryota,37I75@33090|Viridiplantae,3GA6F@35493|Streptophyta,4JFHS@91835|fabids	35493|Streptophyta	S	BSD domain-containing protein	-	-	-	-	-	-	-	-	-	-	-	-	BSD
VLG2_001357	981085.XP_010090376.1	3.96e-32	119	2CYFB@1|root,2S40F@2759|Eukaryota,37WBC@33090|Viridiplantae,3GK48@35493|Streptophyta,4JUNI@91835|fabids	35493|Streptophyta	S	Plant lipid transfer protein / seed storage protein / trypsin-alpha amylase inhibitor domain family	-	-	-	-	-	-	-	-	-	-	-	-	-
VLG2_001829	981085.XP_010101343.1	1.36e-64	213	COG5434@1|root,2QRN7@2759|Eukaryota,37I95@33090|Viridiplantae,3G73I@35493|Streptophyta,4JE1C@91835|fabids	35493|Streptophyta	G	Polygalacturonase-like	-	GO:0005575,GO:0005576,GO:0005618,GO:0005623,GO:0030312,GO:0044464,GO:0071944	3.2.1.15	ko:K01184	ko00040,ko01100,map00040,map01100	M00081	R01982,R02360	RC00049	ko00000,ko00001,ko00002,ko01000	-	-	-	Glyco_hydro_28
VLG2_001885	3694.POPTR_0006s23490.1	6.4e-24	108	COG1236@1|root,KOG4374@1|root,KOG1361@2759|Eukaryota,KOG4374@2759|Eukaryota,37QW5@33090|Viridiplantae,3GG5Q@35493|Streptophyta,4JG4H@91835|fabids	35493|Streptophyta	AL	DNA cross-link repair protein	-	GO:0000228,GO:0000715,GO:0000723,GO:0000726,GO:0000781,GO:0000784,GO:0003674,GO:0003676,GO:0003677,GO:0003684,GO:0003824,GO:0004518,GO:0004527,GO:0004529,GO:0004536,GO:0005488,GO:0005575,GO:0005622,GO:0005623,GO:0005634,GO:0005654,GO:0005694,GO:0006139,GO:0006259,GO:0006281,GO:0006289,GO:0006302,GO:0006303,GO:0006725,GO:0006807,GO:0006950,GO:0006974,GO:0006996,GO:0008150,GO:0008152,GO:0008409,GO:…	-	ko:K15340	-	-	-	-	ko00000,ko03400	-	-	-	DRMBL,Lactamase_B_2,SAM_1
VLG2_000539	38727.Pavir.J40024.1.p	2.47e-10	60.8	COG5044@1|root,KOG1439@2759|Eukaryota,37IAP@33090|Viridiplantae,3GDR2@35493|Streptophyta,3KV69@4447|Liliopsida,3IE2U@38820|Poales	35493|Streptophyta	O	Belongs to the Rab GDI family	-	GO:0001558,GO:0003674,GO:0005092,GO:0005093,GO:0005488,GO:0005515,GO:0005575,GO:0005576,GO:0005622,GO:0005623,GO:0005737,GO:0005829,GO:0005911,GO:0007154,GO:0007165,GO:0007264,GO:0007265,GO:0007275,GO:0007399,GO:0008150,GO:0008361,GO:0009506,GO:0009987,GO:0010035,GO:0010038,GO:0010720,GO:0010721,GO:0010769,GO:0010770,GO:0010771,GO:0010975,GO:0010976,GO:0010977,GO:0016043,GO:0017016,GO:0017137,GO:…	-	ko:K17255	-	-	-	-	ko00000,ko04147	-	-	-	GDI
VLG2_001872	3983.cassava4.1_016751m	3.82e-14	70.5	29TJ0@1|root,2RXYN@2759|Eukaryota,37U5X@33090|Viridiplantae,3GXH7@35493|Streptophyta,4JG5U@91835|fabids	35493|Streptophyta	S	Remorin, N-terminal region	-	GO:0003674,GO:0005488,GO:0005575,GO:0005623,GO:0005886,GO:0007154,GO:0007267,GO:0008150,GO:0009987,GO:0016020,GO:0023052,GO:0030246,GO:0031406,GO:0033293,GO:0036094,GO:0043167,GO:0043168,GO:0043177,GO:0044464,GO:0048029,GO:0048032,GO:0071944	-	-	-	-	-	-	-	-	-	-	Remorin_C,Remorin_N
VLG2_001029	3694.POPTR_0014s12960.1	1.02e-32	122	2E1W2@1|root,2S95S@2759|Eukaryota,37WZ3@33090|Viridiplantae,3GKMQ@35493|Streptophyta,4JR09@91835|fabids	35493|Streptophyta	S	Classical arabinogalactan protein	-	GO:0005575,GO:0008150,GO:0009628,GO:0016020,GO:0031224,GO:0031225,GO:0044425,GO:0050896,GO:0080167	-	-	-	-	-	-	-	-	-	-	-
VLG2_000157	4641.GSMUA_AchrUn_randomP09170_001	1.72e-22	95.9	COG4886@1|root,KOG0619@2759|Eukaryota,380Y3@33090|Viridiplantae,3GR1N@35493|Streptophyta	35493|Streptophyta	S	Leucine rich repeat N-terminal domain	-	-	-	-	-	-	-	-	-	-	-	-	LRRNT_2
VLG2_000136	3760.EMJ04549	1.7e-21	99.8	COG4886@1|root,KOG0619@2759|Eukaryota,37JQI@33090|Viridiplantae,3G97Z@35493|Streptophyta	35493|Streptophyta	Q	LRR receptor-like serine threonine-protein kinase	-	GO:0000003,GO:0001704,GO:0001706,GO:0003006,GO:0005575,GO:0005618,GO:0005623,GO:0005886,GO:0006810,GO:0006833,GO:0006950,GO:0007275,GO:0007369,GO:0007389,GO:0007492,GO:0008104,GO:0008150,GO:0009505,GO:0009531,GO:0009611,GO:0009653,GO:0009790,GO:0009791,GO:0009793,GO:0009798,GO:0009888,GO:0009987,GO:0010154,GO:0010453,GO:0010470,GO:0016020,GO:0022414,GO:0022603,GO:0030104,GO:0030154,GO:0030312,GO:…	-	-	-	-	-	-	-	-	-	-	LRRNT_2,LRR_1,LRR_6,LRR_8
VLG2_001972	981085.XP_010090328.1	4.44e-304	848	KOG4197@1|root,KOG4197@2759|Eukaryota,37MWD@33090|Viridiplantae,3GA5B@35493|Streptophyta	35493|Streptophyta	S	Pentatricopeptide repeat-containing protein	-	-	-	-	-	-	-	-	-	-	-	-	PPR,PPR_2,RRM_1
VLG2_000207	3827.XP_004505200.1	6.14e-153	440	COG0657@1|root,KOG1515@2759|Eukaryota,37R02@33090|Viridiplantae,3G9R7@35493|Streptophyta,4JST1@91835|fabids	35493|Streptophyta	V	Carboxylesterase family	-	GO:0003674,GO:0003824,GO:0005575,GO:0005622,GO:0005623,GO:0005737,GO:0005829,GO:0008150,GO:0008152,GO:0009056,GO:0016787,GO:0016788,GO:0044424,GO:0044444,GO:0044464,GO:0052689	-	-	-	-	-	-	-	-	-	-	Abhydrolase_3
VLG2_000200	102107.XP_008236603.1	3.51e-52	173	COG0657@1|root,KOG1515@2759|Eukaryota,37MUA@33090|Viridiplantae,3G99W@35493|Streptophyta,4JT7T@91835|fabids	35493|Streptophyta	V	Carboxylesterase	-	GO:0003674,GO:0003824,GO:0005575,GO:0005622,GO:0005623,GO:0005737,GO:0005829,GO:0008150,GO:0008152,GO:0009056,GO:0016787,GO:0016788,GO:0044424,GO:0044444,GO:0044464,GO:0052689	-	-	-	-	-	-	-	-	-	-	Abhydrolase_3
VLG2_000202	225117.XP_009358071.1	4.76e-127	372	COG0657@1|root,KOG1515@2759|Eukaryota,37MUA@33090|Viridiplantae,3G99W@35493|Streptophyta,4JT7T@91835|fabids	35493|Streptophyta	V	Carboxylesterase	-	GO:0003674,GO:0003824,GO:0005575,GO:0005622,GO:0005623,GO:0005737,GO:0005829,GO:0008150,GO:0008152,GO:0009056,GO:0016787,GO:0016788,GO:0044424,GO:0044444,GO:0044464,GO:0052689	-	-	-	-	-	-	-	-	-	-	Abhydrolase_3
VLG2_001513	981085.XP_010099546.1	1.79e-145	461	COG4886@1|root,KOG0619@2759|Eukaryota,37IH3@33090|Viridiplantae,3GGP1@35493|Streptophyta,4JS40@91835|fabids	35493|Streptophyta	T	Receptor-like protein 12	-	GO:0008150,GO:0009888,GO:0010073,GO:0032501,GO:0032502,GO:0048507,GO:0048856	-	-	-	-	-	-	-	-	-	-	LRRNT_2,LRR_1,LRR_6,LRR_8
VLG2_001148	57918.XP_004288376.1	9.59e-44	146	KOG0724@1|root,KOG0724@2759|Eukaryota,37VYI@33090|Viridiplantae,3GKG3@35493|Streptophyta,4JUQD@91835|fabids	35493|Streptophyta	O	SANT SWI3, ADA2, N-CoR and TFIIIB'' DNA-binding domains	-	-	-	-	-	-	-	-	-	-	-	-	Myb_DNA-binding
VLG2_002050	161934.XP_010690686.1	3.42e-19	85.5	KOG1075@1|root,KOG1075@2759|Eukaryota,37TIF@33090|Viridiplantae,3G9IZ@35493|Streptophyta	35493|Streptophyta	L	ribonuclease H protein	-	-	-	-	-	-	-	-	-	-	-	-	RVT_1,RVT_3,zf-CCHC_4,zf-RVT
VLG2_001181	3649.evm.model.supercontig_1096.1	2.13e-12	67.8	2D0HY@1|root,2SE98@2759|Eukaryota,37XPK@33090|Viridiplantae,3GM82@35493|Streptophyta	35493|Streptophyta	S	NPR1 interacting	-	-	-	-	-	-	-	-	-	-	-	-	NPR1_interact
VLG2_002042	3694.POPTR_0009s08670.1	3.49e-89	266	COG2340@1|root,KOG3017@2759|Eukaryota,37UH8@33090|Viridiplantae,3GIM9@35493|Streptophyta,4JTVI@91835|fabids	35493|Streptophyta	S	Belongs to the CRISP family	-	-	-	ko:K13449	ko04016,ko04075,ko04626,map04016,map04075,map04626	-	-	-	ko00000,ko00001	-	-	-	CAP
VLG2_000235	57918.XP_004304020.1	2.71e-207	590	KOG1192@1|root,KOG1192@2759|Eukaryota,37TCW@33090|Viridiplantae,3GFCH@35493|Streptophyta,4JEGZ@91835|fabids	35493|Streptophyta	CG	Belongs to the UDP-glycosyltransferase family	-	-	2.4.1.263	ko:K14595	ko00906,ko01100,ko01110,map00906,map01100,map01110	-	R07575	RC00005,RC00523	ko00000,ko00001,ko01000,ko01003	-	GT1	-	UDPGT
VLG2_000227	3750.XP_008373170.1	3.08e-189	543	KOG4585@1|root,KOG4585@2759|Eukaryota,37R9A@33090|Viridiplantae,3G90M@35493|Streptophyta,4JKMQ@91835|fabids	35493|Streptophyta	L	DDE superfamily endonuclease	-	-	-	-	-	-	-	-	-	-	-	-	DDE_Tnp_4
VLG2_001129	3694.POPTR_0002s19220.1	2.27e-36	133	2D3E3@1|root,2SR8P@2759|Eukaryota,380U5@33090|Viridiplantae,3GM4T@35493|Streptophyta	35493|Streptophyta	S	Invertase pectin methylesterase inhibitor	-	GO:0003674,GO:0003824,GO:0004857,GO:0005575,GO:0005623,GO:0008150,GO:0010029,GO:0016787,GO:0016788,GO:0030234,GO:0030599,GO:0043086,GO:0044092,GO:0044464,GO:0046910,GO:0048580,GO:0050789,GO:0050790,GO:0050793,GO:0051239,GO:0052689,GO:0065007,GO:0065009,GO:0071944,GO:0098772,GO:1900140,GO:2000026	-	-	-	-	-	-	-	-	-	-	PMEI
VLG3_001278	4006.Lus10020850	5.82e-11	66.2	COG2124@1|root,KOG0156@2759|Eukaryota,37N5Y@33090|Viridiplantae,3GGFD@35493|Streptophyta,4JKM4@91835|fabids	35493|Streptophyta	Q	Cytochrome p450	-	GO:0003674,GO:0003824,GO:0004497,GO:0005488,GO:0005515,GO:0005575,GO:0005622,GO:0005623,GO:0005737,GO:0005739,GO:0005783,GO:0005886,GO:0006725,GO:0008150,GO:0008152,GO:0009058,GO:0009698,GO:0009699,GO:0009804,GO:0009805,GO:0009808,GO:0009809,GO:0009812,GO:0009813,GO:0009987,GO:0012505,GO:0016020,GO:0016491,GO:0016705,GO:0016709,GO:0018130,GO:0019438,GO:0019748,GO:0042802,GO:0043226,GO:0043227,GO:…	1.14.13.36	ko:K09754	ko00940,ko00941,ko00945,ko01100,ko01110,map00940,map00941,map00945,map01100,map01110	M00039	R04342,R06582	RC00046	ko00000,ko00001,ko00002,ko00199,ko01000	-	-	-	p450
VLG3_001686	3694.POPTR_0001s23700.1	5.24e-17	79.7	2BYS7@1|root,2S2HY@2759|Eukaryota,37VS3@33090|Viridiplantae,3GJZ1@35493|Streptophyta,4JQBK@91835|fabids	35493|Streptophyta	S	C1 domain	-	-	-	-	-	-	-	-	-	-	-	-	C1_2
VLG3_000319	981085.XP_010112989.1	1.54e-58	200	28KU2@1|root,2QZ02@2759|Eukaryota,37SCU@33090|Viridiplantae,3GBXQ@35493|Streptophyta,4JSEG@91835|fabids	35493|Streptophyta	-	-	-	-	-	-	-	-	-	-	-	-	-	-	-
VLG3_000316	102107.XP_008238040.1	4.24e-17	86.3	28JWX@1|root,2QSB5@2759|Eukaryota,37R9C@33090|Viridiplantae,3GDHB@35493|Streptophyta,4JHR5@91835|fabids	35493|Streptophyta	C	Belongs to the alternative oxidase family	-	GO:0003674,GO:0003824,GO:0005575,GO:0005622,GO:0005623,GO:0005737,GO:0005739,GO:0006091,GO:0006950,GO:0007154,GO:0007165,GO:0008150,GO:0008152,GO:0009266,GO:0009409,GO:0009628,GO:0009916,GO:0009987,GO:0015980,GO:0016491,GO:0016679,GO:0016682,GO:0023052,GO:0031930,GO:0043226,GO:0043227,GO:0043229,GO:0043231,GO:0044237,GO:0044424,GO:0044444,GO:0044464,GO:0045333,GO:0050789,GO:0050794,GO:0050896,GO:…	1.10.3.11	ko:K17893	-	-	R09504	RC00061	ko00000,ko01000	-	-	-	AOX
VLG3_001723	981085.XP_010095899.1	3.67e-182	526	KOG1192@1|root,KOG1192@2759|Eukaryota,37M79@33090|Viridiplantae,3GDB3@35493|Streptophyta,4JSI1@91835|fabids	35493|Streptophyta	CG	Anthocyanidin 5,3-O-glucosyltransferase-like	-	-	-	-	-	-	-	-	-	-	-	-	UDPGT
VLG3_001703	102107.XP_008237998.1	6.77e-146	435	KOG4197@1|root,KOG4197@2759|Eukaryota,37T1V@33090|Viridiplantae,3GDJ6@35493|Streptophyta,4JIYF@91835|fabids	35493|Streptophyta	S	Pentatricopeptide repeat-containing protein	-	-	-	-	-	-	-	-	-	-	-	-	PPR,PPR_2
VLG3_000856	981085.XP_010107275.1	2.45e-48	163	29U5U@1|root,2RXHX@2759|Eukaryota,37TV5@33090|Viridiplantae,3GBGQ@35493|Streptophyta,4JP11@91835|fabids	35493|Streptophyta	J	30S ribosomal protein S6 alpha	-	GO:0003674,GO:0003676,GO:0003723,GO:0003735,GO:0005198,GO:0005488,GO:0005575,GO:0005622,GO:0005623,GO:0005737,GO:0009507,GO:0009534,GO:0009535,GO:0009536,GO:0009579,GO:0016020,GO:0019843,GO:0031976,GO:0031984,GO:0034357,GO:0042651,GO:0043226,GO:0043227,GO:0043229,GO:0043231,GO:0044422,GO:0044424,GO:0044434,GO:0044435,GO:0044436,GO:0044444,GO:0044446,GO:0044464,GO:0055035,GO:0070181,GO:0097159,GO:…	-	ko:K02990	ko03010,map03010	M00178	-	-	br01610,ko00000,ko00001,ko00002,ko03011,ko03029	-	-	-	Ribosomal_S6
VLG3_001709	102107.XP_008238037.1	5.26e-176	504	KOG1072@1|root,KOG1072@2759|Eukaryota,37PYQ@33090|Viridiplantae,3GBQ4@35493|Streptophyta,4JHNI@91835|fabids	35493|Streptophyta	S	F-box kelch-repeat protein	-	GO:0000151,GO:0005575,GO:0005622,GO:0005623,GO:0008150,GO:0009628,GO:0031461,GO:0031463,GO:0032991,GO:0044424,GO:0044464,GO:0050896,GO:0080167,GO:1902494,GO:1990234	-	-	-	-	-	-	-	-	-	-	Kelch_6
VLG3_000850	3983.cassava4.1_034311m	1.39e-157	455	KOG2824@1|root,KOG2824@2759|Eukaryota,37MC0@33090|Viridiplantae,3G7CN@35493|Streptophyta,4JK7U@91835|fabids	35493|Streptophyta	O	Glutaredoxin	-	-	-	ko:K17479	-	-	-	-	ko00000,ko01009,ko03110	-	-	-	Glutaredoxin
VLG3_001178	3760.EMJ11419	2.08e-101	300	28QVS@1|root,2QXIN@2759|Eukaryota,37TQQ@33090|Viridiplantae,3GIC5@35493|Streptophyta,4JNVJ@91835|fabids	35493|Streptophyta	S	21 kDa protein-like	-	-	-	-	-	-	-	-	-	-	-	-	PMEI
VLG3_001157	3649.evm.model.supercontig_29.56	1.61e-61	210	COG0436@1|root,KOG0256@2759|Eukaryota,37NW4@33090|Viridiplantae,3GFE4@35493|Streptophyta,3HRKX@3699|Brassicales	35493|Streptophyta	T	aminotransferase ACS10	-	-	-	ko:K14270	-	-	-	-	ko00000,ko01007	-	-	-	Aminotran_1_2
VLG3_001146	3983.cassava4.1_029433m	3.46e-127	382	COG2124@1|root,KOG0156@2759|Eukaryota,37QSJ@33090|Viridiplantae,3G8WW@35493|Streptophyta	35493|Streptophyta	Q	Belongs to the cytochrome P450 family	-	-	-	ko:K20556	-	-	-	-	ko00000,ko00199	-	-	-	p450
VLG3_001596	29730.Gorai.006G022600.1	2.18e-27	108	COG4886@1|root,2QVKB@2759|Eukaryota,37PZ6@33090|Viridiplantae,3GEPX@35493|Streptophyta	35493|Streptophyta	T	Encoded by	-	-	2.7.11.1	ko:K04733	ko04010,ko04064,ko04620,ko04621,ko04624,ko04722,ko05133,ko05140,ko05142,ko05145,ko05152,ko05162,ko05164,map04010,map04064,map04620,map04621,map04624,map04722,map05133,map05140,map05142,map05145,map05152,map05162,map05164	M00686	-	-	ko00000,ko00001,ko00002,ko01000,ko01001	-	-	-	LRR_1,LRR_4,LRR_8,Pkinase,Pkinase_Tyr
VLG3_000278	102107.XP_008245160.1	1.23e-25	104	2C0PQ@1|root,2QU1K@2759|Eukaryota,37KW4@33090|Viridiplantae,3GDIS@35493|Streptophyta,4JNBN@91835|fabids	35493|Streptophyta	Q	Belongs to the peroxidase family. Classical plant (class III) peroxidase subfamily	-	-	1.11.1.7	ko:K00430	ko00940,ko01100,ko01110,map00940,map01100,map01110	-	R00602,R02596,R03919,R04007,R07443	RC00034	ko00000,ko00001,ko01000	-	-	-	peroxidase
VLG3_000244	2711.XP_006481080.1	8.14e-88	265	COG1881@1|root,2RXGS@2759|Eukaryota,37TTX@33090|Viridiplantae,3GHW9@35493|Streptophyta	35493|Streptophyta	S	UPF0098 protein	-	-	-	ko:K06910	-	-	-	-	ko00000	-	-	-	PBP
VLG3_001551	3880.AES59715	4.32e-55	175	KOG0562@1|root,KOG0562@2759|Eukaryota,3896V@33090|Viridiplantae,3GY46@35493|Streptophyta,4JWBX@91835|fabids	35493|Streptophyta	S	Scavenger mRNA decapping enzyme C-term binding	-	-	3.1.11.7,3.1.11.8,3.1.12.2	ko:K10863	-	-	-	-	ko00000,ko01000,ko03400	-	-	-	DcpS_C,zf-C2HE
VLG3_000698	4641.GSMUA_Achr1P03110_001	1.58e-29	119	COG1404@1|root,2QPQR@2759|Eukaryota,37HQV@33090|Viridiplantae,3GC98@35493|Streptophyta	2759|Eukaryota	O	subtilisin-like protease	-	-	-	-	-	-	-	-	-	-	-	-	Inhibitor_I9,PA,Peptidase_S8
VLG3_000777	29760.VIT_02s0025g00250.t01	2.67e-36	129	2CXF2@1|root,2S5PX@2759|Eukaryota,37W2J@33090|Viridiplantae,3GK97@35493|Streptophyta	35493|Streptophyta	S	SPIRAL1-like 5	-	-	-	ko:K18635	-	-	-	-	ko00000,ko04812	-	-	-	-
VLG3_001606	3694.POPTR_0002s12290.1	9.97e-13	73.6	COG4886@1|root,2QVKB@2759|Eukaryota,37PZ6@33090|Viridiplantae,3GEPX@35493|Streptophyta	35493|Streptophyta	T	Encoded by	-	-	2.7.11.1	ko:K04733	ko04010,ko04064,ko04620,ko04621,ko04624,ko04722,ko05133,ko05140,ko05142,ko05145,ko05152,ko05162,ko05164,map04010,map04064,map04620,map04621,map04624,map04722,map05133,map05140,map05142,map05145,map05152,map05162,map05164	M00686	-	-	ko00000,ko00001,ko00002,ko01000,ko01001	-	-	-	LRR_1,LRR_4,LRR_8,Pkinase,Pkinase_Tyr
VLG3_000738	57918.XP_004298781.1	1.02e-17	82	2CNC2@1|root,2QV4N@2759|Eukaryota,37JRN@33090|Viridiplantae,3GCTB@35493|Streptophyta	35493|Streptophyta	S	thaumatin-like protein	-	GO:0002831,GO:0006950,GO:0006952,GO:0008150,GO:0009605,GO:0009607,GO:0009620,GO:0031341,GO:0031343,GO:0031347,GO:0032101,GO:0040008,GO:0042268,GO:0043207,GO:0043900,GO:0043901,GO:0043902,GO:0043903,GO:0044126,GO:0044130,GO:0044144,GO:0044146,GO:0045919,GO:0045926,GO:0048518,GO:0048519,GO:0048522,GO:0048583,GO:0050789,GO:0050794,GO:0050832,GO:0050896,GO:0051704,GO:0051707,GO:0051709,GO:0051710,GO:…	-	-	-	-	-	-	-	-	-	-	Thaumatin
VLG3_000717	2711.XP_006477360.1	4.14e-97	292	COG1088@1|root,KOG0747@2759|Eukaryota,37J3C@33090|Viridiplantae,3GDHW@35493|Streptophyta	35493|Streptophyta	G	Rhamnose biosynthetic enzyme	-	GO:0003674,GO:0003824,GO:0005575,GO:0005576,GO:0005622,GO:0005623,GO:0005737,GO:0005829,GO:0005886,GO:0005911,GO:0006139,GO:0006725,GO:0006793,GO:0006807,GO:0006810,GO:0008150,GO:0008152,GO:0008830,GO:0008831,GO:0009058,GO:0009225,GO:0009226,GO:0009506,GO:0009812,GO:0009813,GO:0009914,GO:0009966,GO:0009987,GO:0010253,GO:0010280,GO:0010315,GO:0010489,GO:0010490,GO:0010646,GO:0010817,GO:0010928,GO:…	-	ko:K12451	ko00520,ko00523,ko01130,map00520,map00523,map01130	-	R08704,R08705,R08935	RC00182,RC01014,RC01531	ko00000,ko00001,ko01000	-	-	-	RmlD_sub_bind
VLG3_000187	3641.EOY07243	3.38e-47	162	2C5YV@1|root,2QVX7@2759|Eukaryota,37QTX@33090|Viridiplantae,3GAMF@35493|Streptophyta	35493|Streptophyta	U	Clathrin is the major protein of the polyhedral coat of coated pits and vesicles	-	GO:0003674,GO:0005198,GO:0005488,GO:0005515,GO:0005575,GO:0005622,GO:0005623,GO:0005737,GO:0006810,GO:0006897,GO:0006898,GO:0008150,GO:0012506,GO:0016020,GO:0016192,GO:0030117,GO:0030118,GO:0030120,GO:0030125,GO:0030135,GO:0030136,GO:0030276,GO:0030659,GO:0030662,GO:0030665,GO:0031090,GO:0031410,GO:0031982,GO:0032050,GO:0032991,GO:0043226,GO:0043227,GO:0043229,GO:0044422,GO:0044424,GO:0044425,GO:…	-	-	-	-	-	-	-	-	-	-	Clathrin_lg_ch
VLG3_001020	981085.XP_010105006.1	0	914	COG0362@1|root,KOG2653@2759|Eukaryota,37I0U@33090|Viridiplantae,3G9N7@35493|Streptophyta,4JEXM@91835|fabids	35493|Streptophyta	G	Catalyzes the oxidative decarboxylation of 6- phosphogluconate to ribulose 5-phosphate and CO(2), with concomitant reduction of NADP to NADPH	-	GO:0001101,GO:0003674,GO:0003824,GO:0005575,GO:0005622,GO:0005623,GO:0005737,GO:0005739,GO:0005829,GO:0005911,GO:0006081,GO:0006098,GO:0006139,GO:0006725,GO:0006732,GO:0006733,GO:0006739,GO:0006753,GO:0006793,GO:0006796,GO:0006807,GO:0006950,GO:0006970,GO:0008114,GO:0008150,GO:0008152,GO:0009051,GO:0009117,GO:0009266,GO:0009409,GO:0009414,GO:0009415,GO:0009506,GO:0009507,GO:0009532,GO:0009536,GO:…	1.1.1.343,1.1.1.44	ko:K00033	ko00030,ko00480,ko01100,ko01110,ko01120,ko01130,ko01200,map00030,map00480,map01100,map01110,map01120,map01130,map01200	M00004,M00006	R01528,R10221	RC00001,RC00539	ko00000,ko00001,ko00002,ko01000	-	-	-	6PGD,NAD_binding_2
VLG3_000153	225117.XP_009337833.1	9.5e-23	96.7	2A8YV@1|root,2RXRU@2759|Eukaryota,37U9Y@33090|Viridiplantae,3GBS3@35493|Streptophyta,4JP8P@91835|fabids	35493|Streptophyta	S	LURP-one-related	-	-	-	-	-	-	-	-	-	-	-	-	LOR
VLG3_001459	2711.XP_006471436.1	7.4e-31	116	2CMMC@1|root,2QQTV@2759|Eukaryota,37IH4@33090|Viridiplantae,3G7D5@35493|Streptophyta	35493|Streptophyta	S	reductase	-	-	1.23.1.1,1.23.1.2,1.23.1.3,1.23.1.4	ko:K21568	-	-	-	-	ko00000,ko01000	-	-	-	NmrA
VLG3_001449	71139.XP_010068302.1	1.12e-106	361	COG4886@1|root,KOG0619@2759|Eukaryota,37IH3@33090|Viridiplantae,3G7AP@35493|Streptophyta	35493|Streptophyta	E	receptor-like protein 12	-	-	-	-	-	-	-	-	-	-	-	-	LRRNT_2,LRR_1,LRR_6,LRR_8
VLG3_000574	3641.EOY24281	3.35e-72	229	28PHQ@1|root,2QW5S@2759|Eukaryota,37TGX@33090|Viridiplantae,3GHGV@35493|Streptophyta	35493|Streptophyta	K	Transcription factor	-	GO:0003674,GO:0003676,GO:0003677,GO:0003700,GO:0005488,GO:0006355,GO:0008150,GO:0009832,GO:0009834,GO:0009889,GO:0009891,GO:0009893,GO:0009987,GO:0010468,GO:0010556,GO:0010557,GO:0010604,GO:0010628,GO:0019219,GO:0019222,GO:0031323,GO:0031325,GO:0031326,GO:0031328,GO:0042546,GO:0043565,GO:0044085,GO:0045893,GO:0045935,GO:0048518,GO:0048522,GO:0050789,GO:0050794,GO:0051171,GO:0051173,GO:0051252,GO:…	-	-	-	-	-	-	-	-	-	-	AP2
VLG3_001505	4098.XP_009619592.1	4.63e-24	99.8	2BRZA@1|root,2S1XG@2759|Eukaryota,37WGY@33090|Viridiplantae,3GK4Q@35493|Streptophyta,44UAF@71274|asterids	35493|Streptophyta	S	No apical meristem-associated C-terminal domain	-	-	-	-	-	-	-	-	-	-	-	-	NAM-associated
VLG3_000634	981085.XP_010110430.1	4.76e-92	290	COG2072@1|root,KOG1399@2759|Eukaryota,37HT9@33090|Viridiplantae,3GCY7@35493|Streptophyta,4JGCF@91835|fabids	35493|Streptophyta	Q	flavin-containing monooxygenase	-	GO:0003674,GO:0003824,GO:0004497,GO:0008150,GO:0008152,GO:0016491,GO:0055114	-	-	-	-	-	-	-	-	-	-	FMO-like
VLG3_001081	3760.EMJ28423	6.56e-30	108	2E0CV@1|root,2SSVY@2759|Eukaryota,3815X@33090|Viridiplantae,3GR2M@35493|Streptophyta,4JUY9@91835|fabids	35493|Streptophyta	-	-	-	-	-	-	-	-	-	-	-	-	-	-	-
VLG3_000095	4565.Traes_4BS_067D197F2.1	5.32e-45	152	COG0443@1|root,KOG0101@2759|Eukaryota,37K68@33090|Viridiplantae,3GAQN@35493|Streptophyta,3KYJI@4447|Liliopsida	35493|Streptophyta	O	Heat shock cognate 70 kDa protein	-	GO:0005575,GO:0005618,GO:0005622,GO:0005623,GO:0005634,GO:0005737,GO:0005794,GO:0005829,GO:0005886,GO:0006950,GO:0008150,GO:0009266,GO:0009408,GO:0009605,GO:0009607,GO:0009615,GO:0009617,GO:0009628,GO:0010035,GO:0010038,GO:0012505,GO:0016020,GO:0030312,GO:0042221,GO:0043207,GO:0043226,GO:0043227,GO:0043229,GO:0043231,GO:0044424,GO:0044444,GO:0044464,GO:0046686,GO:0050896,GO:0051704,GO:0051707,GO:…	-	ko:K03283	ko03040,ko04010,ko04141,ko04144,ko04213,ko04612,ko04915,ko05134,ko05145,ko05162,ko05164,ko05169,map03040,map04010,map04141,map04144,map04213,map04612,map04915,map05134,map05145,map05162,map05164,map05169	M00353,M00355	-	-	ko00000,ko00001,ko00002,ko01009,ko03009,ko03029,ko03041,ko03051,ko03110,ko04131,ko04147,ko04516	1.A.33.1	-	-	HSP70
VLG3_000099	3760.EMJ07712	3.95e-43	145	2CTXC@1|root,2S4CS@2759|Eukaryota,37WAB@33090|Viridiplantae,3GK3W@35493|Streptophyta,4JQFR@91835|fabids	35493|Streptophyta	-	-	-	-	-	-	-	-	-	-	-	-	-	-	-
VLG3_001775	2711.XP_006493598.1	9.63e-13	66.2	COG1028@1|root,KOG0725@2759|Eukaryota,37RW4@33090|Viridiplantae,3GBV5@35493|Streptophyta	35493|Streptophyta	Q	Tropinone reductase homolog	-	-	1.1.1.206	ko:K08081	ko00960,ko01100,ko01110,map00960,map01100,map01110	-	R02832	RC00144	ko00000,ko00001,ko01000	-	-	-	adh_short
VLG3_000966	981085.XP_010107262.1	4.84e-81	260	28K5D@1|root,2QSJZ@2759|Eukaryota,37S2P@33090|Viridiplantae,3GFGD@35493|Streptophyta,4JJNC@91835|fabids	35493|Streptophyta	G	Beta-amylase	-	GO:0000272,GO:0001101,GO:0003674,GO:0003824,GO:0004553,GO:0005575,GO:0005622,GO:0005623,GO:0005634,GO:0005737,GO:0005829,GO:0005975,GO:0005976,GO:0005982,GO:0005983,GO:0006073,GO:0006950,GO:0008150,GO:0008152,GO:0009056,GO:0009057,GO:0009251,GO:0009414,GO:0009415,GO:0009628,GO:0009987,GO:0010035,GO:0016052,GO:0016160,GO:0016161,GO:0016787,GO:0016798,GO:0042221,GO:0043170,GO:0043226,GO:0043227,GO:…	3.2.1.2	ko:K01177	ko00500,map00500	-	R02112,R11262	-	ko00000,ko00001,ko01000	-	GH14	-	Glyco_hydro_14
VLG3_001806	29730.Gorai.012G110300.1	7.5e-49	169	28N70@1|root,2QUSC@2759|Eukaryota,37KVZ@33090|Viridiplantae,3G86C@35493|Streptophyta	35493|Streptophyta	S	Transcription termination factor nusG	-	-	-	-	-	-	-	-	-	-	-	-	KOW,NusG
VLG4_000896	3880.AES77675	1.16e-86	261	COG2036@1|root,KOG1745@2759|Eukaryota,37TRG@33090|Viridiplantae,3GI60@35493|Streptophyta,4JEG6@91835|fabids	35493|Streptophyta	B	Histone H3	-	-	-	ko:K11253	ko05034,ko05202,ko05322,map05034,map05202,map05322	-	-	-	ko00000,ko00001,ko03036,ko04147	-	-	-	Histone
VLG4_001331	3694.POPTR_0010s07010.1	5.75e-40	144	KOG2501@1|root,KOG2501@2759|Eukaryota,37JND@33090|Viridiplantae,3GDD8@35493|Streptophyta,4JS70@91835|fabids	35493|Streptophyta	O	Nucleoredoxin	-	GO:0000003,GO:0000902,GO:0000904,GO:0001558,GO:0003006,GO:0003674,GO:0003824,GO:0004791,GO:0005575,GO:0005622,GO:0005623,GO:0005737,GO:0005829,GO:0006935,GO:0008150,GO:0008152,GO:0009605,GO:0009636,GO:0009653,GO:0009826,GO:0009856,GO:0009860,GO:0009932,GO:0009987,GO:0010035,GO:0010038,GO:0010183,GO:0010769,GO:0015036,GO:0016043,GO:0016049,GO:0016209,GO:0016491,GO:0016651,GO:0016667,GO:0016668,GO:…	1.8.1.8	ko:K17609	-	-	-	-	ko00000,ko01000,ko01009	-	-	-	C1_2,Thioredoxin_8
VLG4_000487	28532.XP_010558188.1	8.3e-56	187	2CMY1@1|root,2QSMQ@2759|Eukaryota,37JZ2@33090|Viridiplantae,3GAQX@35493|Streptophyta,3HT9U@3699|Brassicales	35493|Streptophyta	S	Protein of unknown function (DUF620)	-	-	-	-	-	-	-	-	-	-	-	-	DUF620
VLG4_000829	71139.XP_010030093.1	2.5e-74	230	2C0PQ@1|root,2QSXF@2759|Eukaryota,37SYH@33090|Viridiplantae,3GCP3@35493|Streptophyta	35493|Streptophyta	Q	Belongs to the peroxidase family. Classical plant (class III) peroxidase subfamily	-	GO:0001666,GO:0006950,GO:0008150,GO:0009628,GO:0009987,GO:0033554,GO:0036293,GO:0036294,GO:0042221,GO:0050896,GO:0051716,GO:0070482,GO:0070887,GO:0071453,GO:0071456	1.11.1.7	ko:K00430	ko00940,ko01100,ko01110,map00940,map01100,map01110	-	R00602,R02596,R03919,R04007,R07443	RC00034	ko00000,ko00001,ko01000	-	-	-	peroxidase
VLG4_000536	102107.XP_008243314.1	3e-78	249	COG0534@1|root,KOG1347@2759|Eukaryota,37IW2@33090|Viridiplantae,3GCH8@35493|Streptophyta,4JIPH@91835|fabids	35493|Streptophyta	V	Belongs to the multi antimicrobial extrusion (MATE) (TC 2.A.66.1) family	-	GO:0003674,GO:0005215,GO:0005575,GO:0005622,GO:0005623,GO:0005737,GO:0006810,GO:0006855,GO:0008150,GO:0009507,GO:0009536,GO:0015238,GO:0015893,GO:0022857,GO:0042221,GO:0042493,GO:0043226,GO:0043227,GO:0043229,GO:0043231,GO:0044424,GO:0044444,GO:0044464,GO:0050896,GO:0051179,GO:0051234,GO:0055085	-	ko:K03327	-	-	-	-	ko00000,ko02000	2.A.66.1	-	-	MatE
VLG4_000515	102107.XP_008243340.1	3.31e-121	362	29BHF@1|root,2RIKK@2759|Eukaryota,37N4I@33090|Viridiplantae,3GHPY@35493|Streptophyta,4JSMK@91835|fabids	35493|Streptophyta	S	Fasciclin-like arabinogalactan protein	-	-	-	-	-	-	-	-	-	-	-	-	Fasciclin
VLG4_000521	981085.XP_010113118.1	9.27e-41	143	2DK72@1|root,2SUBK@2759|Eukaryota,381NQ@33090|Viridiplantae,3GQX2@35493|Streptophyta,4JUU2@91835|fabids	35493|Streptophyta	-	-	-	-	-	-	-	-	-	-	-	-	-	-	-
VLG4_000585	981085.XP_010099266.1	5.84e-34	129	COG0515@1|root,KOG1187@2759|Eukaryota	2759|Eukaryota	KLT	protein serine/threonine kinase activity	-	-	-	-	-	-	-	-	-	-	-	-	GUB_WAK_bind,WAK_assoc
VLG4_001409	225117.XP_009359304.1	3.82e-75	248	28N77@1|root,2QYCI@2759|Eukaryota,37N3J@33090|Viridiplantae,3G8HD@35493|Streptophyta,4JH3C@91835|fabids	35493|Streptophyta	S	Transferase family	-	GO:0003674,GO:0003824,GO:0005975,GO:0005984,GO:0005985,GO:0008150,GO:0008152,GO:0009311,GO:0009987,GO:0016740,GO:0016746,GO:0044237,GO:0044238,GO:0044262,GO:0071704	2.3.1.133	ko:K13065	ko00940,ko00941,ko00945,ko01100,ko01110,map00940,map00941,map00945,map01100,map01110	M00039	R01945,R02416,R07432,R07433	RC00004,RC00055,RC02864	ko00000,ko00001,ko00002,ko01000	-	-	-	Transferase
VLG4_000598	29760.VIT_01s0011g03860.t01	1.31e-182	536	COG0515@1|root,2QPUR@2759|Eukaryota,37JPK@33090|Viridiplantae,3G7U2@35493|Streptophyta	35493|Streptophyta	T	Leucine-rich repeat receptor-like protein kinase	-	-	2.7.11.1	ko:K04733	ko04010,ko04064,ko04620,ko04621,ko04624,ko04722,ko05133,ko05140,ko05142,ko05145,ko05152,ko05162,ko05164,map04010,map04064,map04620,map04621,map04624,map04722,map05133,map05140,map05142,map05145,map05152,map05162,map05164	M00686	-	-	ko00000,ko00001,ko00002,ko01000,ko01001	-	-	-	LRRNT_2,LRR_1,Pkinase,Pkinase_Tyr
VLG4_001026	3988.XP_002535200.1	2.41e-13	67	29F1T@1|root,2S2N8@2759|Eukaryota,37VU2@33090|Viridiplantae,3GJY1@35493|Streptophyta,4JQQC@91835|fabids	35493|Streptophyta	S	MLP-like protein	-	-	-	-	-	-	-	-	-	-	-	-	Bet_v_1
VLG4_000156	3760.EMJ26981	3.42e-152	453	28P38@1|root,2QVPR@2759|Eukaryota,37PVW@33090|Viridiplantae,3GEED@35493|Streptophyta,4JEPV@91835|fabids	35493|Streptophyta	S	Plant specific eukaryotic initiation factor 4B	-	GO:0003674,GO:0003676,GO:0003723,GO:0003729,GO:0003743,GO:0005488,GO:0005515,GO:0005575,GO:0005618,GO:0005623,GO:0005911,GO:0006412,GO:0006413,GO:0006518,GO:0006807,GO:0008135,GO:0008150,GO:0008152,GO:0009058,GO:0009059,GO:0009505,GO:0009506,GO:0009987,GO:0010467,GO:0019538,GO:0030054,GO:0030312,GO:0034641,GO:0034645,GO:0042802,GO:0042803,GO:0043043,GO:0043170,GO:0043603,GO:0043604,GO:0044237,GO:…	-	-	-	-	-	-	-	-	-	-	eIF-4B
VLG4_001013	3988.XP_002526013.1	3.62e-13	72	2E0AG@1|root,2S7RH@2759|Eukaryota,37X3M@33090|Viridiplantae,3GK9W@35493|Streptophyta,4JQWI@91835|fabids	35493|Streptophyta	S	leucine-rich repeat extensin-like protein	-	-	-	-	-	-	-	-	-	-	-	-	-
VLG4_000079	4529.ORUFI01G24510.2	1.29e-16	80.5	COG4886@1|root,KOG0619@2759|Eukaryota,37JQI@33090|Viridiplantae,3G97Z@35493|Streptophyta,3KMSW@4447|Liliopsida,3I80F@38820|Poales	35493|Streptophyta	Q	LRR receptor-like serine threonine-protein kinase	-	-	-	-	-	-	-	-	-	-	-	-	LRRNT_2,LRR_1,LRR_8
VLG4_000949	981085.XP_010096727.1	8.66e-18	84.7	COG1643@1|root,KOG0920@2759|Eukaryota,37QK6@33090|Viridiplantae,3GGG0@35493|Streptophyta,4JJCD@91835|fabids	35493|Streptophyta	A	ATP-dependent RNA helicase	-	GO:0000976,GO:0000977,GO:0000978,GO:0000987,GO:0001012,GO:0001047,GO:0001067,GO:0001503,GO:0001817,GO:0001819,GO:0002151,GO:0002791,GO:0002793,GO:0003674,GO:0003676,GO:0003677,GO:0003690,GO:0003697,GO:0003723,GO:0003724,GO:0003725,GO:0003824,GO:0004004,GO:0004386,GO:0005488,GO:0005515,GO:0005575,GO:0005622,GO:0005623,GO:0005634,GO:0005737,GO:0005829,GO:0006139,GO:0006355,GO:0006357,GO:0006396,GO:…	3.6.4.13	ko:K14442	ko03018,map03018	-	-	-	ko00000,ko00001,ko01000,ko03019	-	-	-	DEAD,HA2,Helicase_C,OB_NTP_bind,dsrm
VLG4_000958	102107.XP_008237390.1	2.32e-36	136	COG4886@1|root,KOG0619@2759|Eukaryota,37IH3@33090|Viridiplantae,3GGP1@35493|Streptophyta,4JS40@91835|fabids	35493|Streptophyta	T	Receptor-like protein 12	-	GO:0008150,GO:0009888,GO:0010073,GO:0032501,GO:0032502,GO:0048507,GO:0048856	-	-	-	-	-	-	-	-	-	-	LRRNT_2,LRR_1,LRR_6,LRR_8
VLG4_000962	102107.XP_008237390.1	1.52e-35	135	COG4886@1|root,KOG0619@2759|Eukaryota,37IH3@33090|Viridiplantae,3GGP1@35493|Streptophyta,4JS40@91835|fabids	35493|Streptophyta	T	Receptor-like protein 12	-	GO:0008150,GO:0009888,GO:0010073,GO:0032501,GO:0032502,GO:0048507,GO:0048856	-	-	-	-	-	-	-	-	-	-	LRRNT_2,LRR_1,LRR_6,LRR_8
VLG4_001516	3694.POPTR_0003s17200.1	2.29e-128	386	COG2124@1|root,KOG0156@2759|Eukaryota,37I3A@33090|Viridiplantae,3GA9B@35493|Streptophyta,4JFYH@91835|fabids	35493|Streptophyta	Q	Cytochrome p450	-	-	1.14.14.1	ko:K07409,ko:K20619	ko00140,ko00232,ko00380,ko00591,ko00830,ko00980,ko00982,ko01100,ko01110,ko05204,map00140,map00232,map00380,map00591,map00830,map00980,map00982,map01100,map01110,map05204	-	R03408,R03629,R07000,R07001,R07021,R07022,R07055,R07056,R07098,R07099,R07939,R07943,R07945,R08293,R08294,R08392,R09405,R09407,R09408	RC00046,RC00334,RC00704,RC00723,RC01349,RC01445,RC01711,RC01732,RC01733,RC01797,RC01827,RC02017,RC02524,RC02526	ko00000,ko00001,ko00199,ko01000	-	-	-	p450
VLG4_000633	3988.XP_002512927.1	1.62e-13	75.9	2EKEA@1|root,2SQBG@2759|Eukaryota,38099@33090|Viridiplantae,3GPU8@35493|Streptophyta	35493|Streptophyta	S	F-box and associated interaction domains-containing protein	-	-	-	-	-	-	-	-	-	-	-	-	F-box,FBA_1
VLG4_000213	981085.XP_010100486.1	9.78e-79	249	2B44N@1|root,2S0G6@2759|Eukaryota,37V19@33090|Viridiplantae,3GJ59@35493|Streptophyta,4JVUB@91835|fabids	35493|Streptophyta	-	-	-	-	-	-	-	-	-	-	-	-	-	-	-
VLG4_000207	3750.XP_008365113.1	2.81e-09	61.6	COG0820@1|root,2QV91@2759|Eukaryota	2759|Eukaryota	J	Radical SAM superfamily	-	-	2.1.1.192	ko:K06941	-	-	-	-	ko00000,ko01000,ko03009	-	-	-	Fer4_14,Radical_SAM
VLG4_000250	57918.XP_004298594.1	1.14e-102	304	2BYKQ@1|root,2QQ4A@2759|Eukaryota,37TE3@33090|Viridiplantae,3G8S4@35493|Streptophyta,4JP0S@91835|fabids	35493|Streptophyta	S	Germin-like protein subfamily 1 member	-	GO:0005575,GO:0005618,GO:0005623,GO:0030312,GO:0044464,GO:0071944	-	-	-	-	-	-	-	-	-	-	Cupin_1
VLG4_000246	3641.EOY00349	1.64e-18	89	COG0513@1|root,KOG0333@2759|Eukaryota,37IE7@33090|Viridiplantae,3G9SU@35493|Streptophyta	35493|Streptophyta	A	DEAD-box ATP-dependent RNA helicase	-	GO:0003674,GO:0003724,GO:0003824,GO:0004004,GO:0004386,GO:0005575,GO:0005622,GO:0005623,GO:0005634,GO:0005730,GO:0005737,GO:0006139,GO:0006725,GO:0006807,GO:0008026,GO:0008150,GO:0008152,GO:0008186,GO:0009507,GO:0009536,GO:0009987,GO:0010501,GO:0016070,GO:0016462,GO:0016787,GO:0016817,GO:0016818,GO:0016887,GO:0017111,GO:0031974,GO:0031981,GO:0034641,GO:0042623,GO:0043170,GO:0043226,GO:0043227,GO:…	-	-	-	-	-	-	-	-	-	-	DEAD,Helicase_C
VLG4_001577	102107.XP_008227987.1	1.85e-76	241	2B415@1|root,2S0FX@2759|Eukaryota,37UPN@33090|Viridiplantae,3GHVR@35493|Streptophyta,4JQ1N@91835|fabids	35493|Streptophyta	-	-	-	-	-	-	-	-	-	-	-	-	-	-	QSregVF_b
VLG4_000270	57918.XP_004309378.1	1.25e-50	164	KOG0406@1|root,KOG0406@2759|Eukaryota,37P8V@33090|Viridiplantae,3GBW7@35493|Streptophyta,4JRZ5@91835|fabids	35493|Streptophyta	O	Glutathione S-transferase	GSTU6	GO:0003674,GO:0003824,GO:0004364,GO:0005575,GO:0005622,GO:0005623,GO:0005737,GO:0006518,GO:0006575,GO:0006749,GO:0006790,GO:0006807,GO:0006950,GO:0006970,GO:0007275,GO:0008150,GO:0008152,GO:0009056,GO:0009314,GO:0009404,GO:0009407,GO:0009416,GO:0009507,GO:0009536,GO:0009628,GO:0009636,GO:0009639,GO:0009640,GO:0009651,GO:0009704,GO:0009719,GO:0009725,GO:0009791,GO:0009987,GO:0010033,GO:0010035,GO:…	2.5.1.18	ko:K00799	ko00480,ko00980,ko00982,ko00983,ko01524,ko05200,ko05204,ko05225,ko05418,map00480,map00980,map00982,map00983,map01524,map05200,map05204,map05225,map05418	-	R03522,R07002,R07003,R07004,R07023,R07024,R07025,R07026,R07069,R07070,R07083,R07084,R07091,R07092,R07093,R07094,R07100,R07113,R07116,R08280,R09409,R11905	RC00004,RC00069,RC00840,RC00948,RC01704,RC01705,RC01706,RC01758,RC01759,RC01765,RC01767,RC01769,RC02243,RC02527,RC02939,RC02940,RC02942,RC02943,RC02944	ko00000,ko00001,ko01000,ko02000	1.A.12.2.2,1.A.12.3.2	-	-	GST_C,GST_C_2,GST_N,GST_N_3
VLG4_001068	71139.XP_010043941.1	5.07e-11	65.9	COG3491@1|root,KOG0143@2759|Eukaryota,37NM9@33090|Viridiplantae,3GC65@35493|Streptophyta	35493|Streptophyta	Q	Belongs to the iron ascorbate-dependent oxidoreductase family	-	-	-	-	-	-	-	-	-	-	-	-	2OG-FeII_Oxy,DIOX_N
VLG4_001048	102107.XP_008221439.1	1.32e-12	68.2	2E0DQ@1|root,2S7UD@2759|Eukaryota,37UTH@33090|Viridiplantae,3GJ15@35493|Streptophyta,4JTFT@91835|fabids	35493|Streptophyta	S	Protein PLANT CADMIUM RESISTANCE 2-like	-	-	-	-	-	-	-	-	-	-	-	-	PLAC8
VLG4_000342	225117.XP_009356347.1	3.08e-72	234	28HIX@1|root,2QPWS@2759|Eukaryota,37SRK@33090|Viridiplantae,3GCWM@35493|Streptophyta,4JP19@91835|fabids	35493|Streptophyta	-	-	-	-	-	-	-	-	-	-	-	-	-	-	-
VLG4_001239	2711.XP_006465491.1	8.11e-263	808	COG2801@1|root,KOG4658@1|root,KOG0017@2759|Eukaryota,KOG4658@2759|Eukaryota,37RIF@33090|Viridiplantae,3G9AM@35493|Streptophyta	35493|Streptophyta	K	cysteine-rich RLK (RECEPTOR-like protein kinase) 8	-	-	-	-	-	-	-	-	-	-	-	-	RVT_2,Retrotran_gag_2,gag_pre-integrs,rve
VLG4_000703	3983.cassava4.1_026503m	1.63e-51	176	COG1112@1|root,KOG1801@2759|Eukaryota,37RMF@33090|Viridiplantae,3G7ST@35493|Streptophyta,4JG4I@91835|fabids	35493|Streptophyta	A	TPR and ankyrin repeat-containing protein	-	GO:0003674,GO:0003678,GO:0003724,GO:0003824,GO:0004003,GO:0004004,GO:0004386,GO:0005488,GO:0005515,GO:0005575,GO:0005622,GO:0005623,GO:0005634,GO:0005657,GO:0005694,GO:0005737,GO:0006139,GO:0006259,GO:0006260,GO:0006261,GO:0006281,GO:0006283,GO:0006289,GO:0006351,GO:0006353,GO:0006355,GO:0006357,GO:0006364,GO:0006366,GO:0006369,GO:0006378,GO:0006396,GO:0006397,GO:0006399,GO:0006725,GO:0006807,GO:…	-	ko:K10706	-	-	-	-	ko00000,ko01000,ko03021	-	-	-	AAA_11,AAA_12,AAA_19,UvrD-helicase
VLG5_000082	981085.XP_010099153.1	7.19e-29	113	2DH9Y@1|root,2S5W7@2759|Eukaryota,37WK0@33090|Viridiplantae,3GK1N@35493|Streptophyta	35493|Streptophyta	-	-	-	-	-	-	-	-	-	-	-	-	-	-	-
VLG5_000880	57918.XP_004297618.1	5.83e-127	365	COG5491@1|root,KOG3232@2759|Eukaryota,37JMK@33090|Viridiplantae,3GAA4@35493|Streptophyta,4JJU0@91835|fabids	35493|Streptophyta	U	Belongs to the SNF7 family	-	GO:0000003,GO:0000578,GO:0003006,GO:0005575,GO:0005622,GO:0005623,GO:0005737,GO:0005768,GO:0005770,GO:0006605,GO:0006623,GO:0006810,GO:0006886,GO:0007034,GO:0007275,GO:0007389,GO:0008104,GO:0008150,GO:0009790,GO:0009791,GO:0009793,GO:0009798,GO:0009880,GO:0010154,GO:0012505,GO:0015031,GO:0015833,GO:0016192,GO:0016197,GO:0022414,GO:0031410,GO:0031982,GO:0032501,GO:0032502,GO:0032509,GO:0033036,GO:…	-	ko:K12197	ko04144,ko04217,map04144,map04217	M00412	-	-	ko00000,ko00001,ko00002,ko04131,ko04147	-	-	-	Snf7
VLG5_000408	981085.XP_010096621.1	9.39e-23	98.2	COG0631@1|root,KOG0698@2759|Eukaryota,37M3H@33090|Viridiplantae,3GABN@35493|Streptophyta,4JJJR@91835|fabids	35493|Streptophyta	T	phosphatase 2c	-	GO:0001101,GO:0003674,GO:0003824,GO:0004721,GO:0004722,GO:0005488,GO:0005515,GO:0005575,GO:0005622,GO:0005623,GO:0005634,GO:0005737,GO:0005829,GO:0006464,GO:0006470,GO:0006793,GO:0006796,GO:0006807,GO:0006950,GO:0007154,GO:0007165,GO:0008150,GO:0008152,GO:0009266,GO:0009409,GO:0009414,GO:0009415,GO:0009628,GO:0009719,GO:0009725,GO:0009737,GO:0009738,GO:0009755,GO:0009787,GO:0009788,GO:0009966,GO:…	3.1.3.16	ko:K14497	ko04016,ko04075,ko04931,map04016,map04075,map04931	-	-	-	ko00000,ko00001,ko01000	-	-	-	PP2C
VLG5_001718	981085.XP_010101438.1	1.22e-20	94.7	KOG0118@1|root,KOG0118@2759|Eukaryota,37RGZ@33090|Viridiplantae,3GA7K@35493|Streptophyta,4JE25@91835|fabids	35493|Streptophyta	A	Polyadenylate-binding protein	-	GO:0000302,GO:0001101,GO:0003674,GO:0003676,GO:0003723,GO:0003727,GO:0003729,GO:0005488,GO:0005575,GO:0005622,GO:0005623,GO:0005634,GO:0006950,GO:0006979,GO:0008143,GO:0008150,GO:0009719,GO:0009725,GO:0009735,GO:0010033,GO:0010035,GO:0010193,GO:0042221,GO:0042493,GO:0043226,GO:0043227,GO:0043229,GO:0043231,GO:0044424,GO:0044464,GO:0046677,GO:0050896,GO:0070717,GO:0097159,GO:1901363,GO:1901700	-	-	-	-	-	-	-	-	-	-	RRM_1
VLG5_001363	981085.XP_010098081.1	3.93e-73	225	COG0186@1|root,KOG1740@2759|Eukaryota,37UH4@33090|Viridiplantae,3GJ37@35493|Streptophyta,4JPZC@91835|fabids	35493|Streptophyta	J	Belongs to the universal ribosomal protein uS17 family	RPS17	GO:0000312,GO:0000313,GO:0000314,GO:0003674,GO:0003735,GO:0005198,GO:0005575,GO:0005622,GO:0005623,GO:0005737,GO:0005829,GO:0005840,GO:0006412,GO:0006518,GO:0006807,GO:0006996,GO:0008150,GO:0008152,GO:0009058,GO:0009059,GO:0009507,GO:0009526,GO:0009532,GO:0009534,GO:0009536,GO:0009547,GO:0009570,GO:0009579,GO:0009657,GO:0009941,GO:0009987,GO:0010467,GO:0015935,GO:0016043,GO:0019538,GO:0022626,GO:…	-	ko:K02961	ko03010,map03010	M00178,M00179	-	-	br01610,ko00000,ko00001,ko00002,ko03011	-	-	-	Ribosomal_S17
VLG5_002214	29760.VIT_10s0116g01160.t01	2.59e-127	376	COG3866@1|root,2QSYA@2759|Eukaryota,37QW2@33090|Viridiplantae,3GC1S@35493|Streptophyta	35493|Streptophyta	G	Pectate lyase	-	-	4.2.2.2	ko:K01728	ko00040,ko02024,map00040,map02024	-	R02361,R06240	RC00049,RC00705	ko00000,ko00001,ko01000	-	-	-	Pec_lyase_C
VLG5_000441	3641.EOX95830	1.98e-33	123	KOG2546@1|root,KOG2546@2759|Eukaryota,37HI2@33090|Viridiplantae,3GCXJ@35493|Streptophyta	35493|Streptophyta	TZ	Uncharacterized conserved protein (DUF2358)	-	-	-	-	-	-	-	-	-	-	-	-	DUF2358
VLG5_000459	102107.XP_008231332.1	9.31e-38	137	KOG0118@1|root,KOG0118@2759|Eukaryota,37MFE@33090|Viridiplantae,3GCQV@35493|Streptophyta,4JMNX@91835|fabids	35493|Streptophyta	A	30S ribosomal protein 2	-	GO:0001101,GO:0003674,GO:0003676,GO:0003677,GO:0003697,GO:0003723,GO:0005488,GO:0005575,GO:0005622,GO:0005623,GO:0005737,GO:0006950,GO:0006970,GO:0008150,GO:0009266,GO:0009409,GO:0009414,GO:0009415,GO:0009507,GO:0009526,GO:0009532,GO:0009534,GO:0009535,GO:0009536,GO:0009570,GO:0009579,GO:0009628,GO:0009651,GO:0009941,GO:0010029,GO:0010035,GO:0016020,GO:0031967,GO:0031975,GO:0031976,GO:0031984,GO:…	-	ko:K13126	ko03013,ko03015,ko03018,map03013,map03015,map03018	-	-	-	ko00000,ko00001,ko03019,ko03041	-	-	-	RRM_1
VLG5_002169	3750.XP_008349317.1	3.17e-44	154	2A180@1|root,2RY05@2759|Eukaryota,37U8F@33090|Viridiplantae,3GE0D@35493|Streptophyta,4JPRX@91835|fabids	35493|Streptophyta	-	-	-	-	-	-	-	-	-	-	-	-	-	-	-
VLG5_002171	981085.XP_010090958.1	5.55e-40	141	COG0400@1|root,KOG2112@2759|Eukaryota,37JY6@33090|Viridiplantae,3G9VX@35493|Streptophyta,4JRAJ@91835|fabids	35493|Streptophyta	I	Acyl-protein thioesterase	-	GO:0002084,GO:0002376,GO:0002682,GO:0003674,GO:0003824,GO:0004620,GO:0004623,GO:0005575,GO:0005622,GO:0005623,GO:0005737,GO:0006464,GO:0006629,GO:0006644,GO:0006650,GO:0006654,GO:0006793,GO:0006796,GO:0006807,GO:0006950,GO:0006952,GO:0006955,GO:0008150,GO:0008152,GO:0008474,GO:0008610,GO:0008654,GO:0009056,GO:0009057,GO:0009058,GO:0009605,GO:0009607,GO:0009617,GO:0009814,GO:0009816,GO:0009987,GO:…	3.1.1.5	ko:K06130	ko00564,map00564	-	R02747,R03417	RC00037,RC00094	ko00000,ko00001,ko01000	-	-	-	Abhydrolase_2
VLG5_001276	981085.XP_010097183.1	7.8e-19	87	COG3491@1|root,KOG0143@2759|Eukaryota,37MHA@33090|Viridiplantae,3GFXK@35493|Streptophyta,4JG66@91835|fabids	35493|Streptophyta	Q	Belongs to the iron ascorbate-dependent oxidoreductase family	-	GO:0003674,GO:0003824,GO:0007275,GO:0007568,GO:0008150,GO:0008152,GO:0010150,GO:0016491,GO:0016679,GO:0016682,GO:0032501,GO:0032502,GO:0048366,GO:0048367,GO:0048731,GO:0048827,GO:0048856,GO:0055114,GO:0090693,GO:0099402	-	-	-	-	-	-	-	-	-	-	2OG-FeII_Oxy,DIOX_N
VLG5_002109	981085.XP_010096496.1	5.73e-99	305	COG0205@1|root,KOG2440@2759|Eukaryota,37JM8@33090|Viridiplantae,3GB5J@35493|Streptophyta,4JGZ6@91835|fabids	35493|Streptophyta	G	Catalyzes the phosphorylation of D-fructose 6-phosphate to fructose 1,6-bisphosphate by ATP, the first committing step of glycolysis	-	GO:0003674,GO:0003824,GO:0003872,GO:0005575,GO:0005622,GO:0005623,GO:0005737,GO:0005829,GO:0005975,GO:0006082,GO:0006090,GO:0006091,GO:0006096,GO:0006139,GO:0006163,GO:0006164,GO:0006165,GO:0006725,GO:0006732,GO:0006733,GO:0006753,GO:0006754,GO:0006757,GO:0006793,GO:0006796,GO:0006807,GO:0008150,GO:0008152,GO:0008443,GO:0009056,GO:0009058,GO:0009108,GO:0009117,GO:0009123,GO:0009124,GO:0009126,GO:…	2.7.1.11	ko:K00850	ko00010,ko00030,ko00051,ko00052,ko00680,ko01100,ko01110,ko01120,ko01130,ko01200,ko01230,ko03018,ko04152,ko05230,map00010,map00030,map00051,map00052,map00680,map01100,map01110,map01120,map01130,map01200,map01230,map03018,map04152,map05230	M00001,M00345	R00756,R03236,R03237,R03238,R03239,R04779	RC00002,RC00017	ko00000,ko00001,ko00002,ko01000,ko01009,ko03019	-	-	-	PFK
VLG5_000819	3760.EMJ12632	8.15e-55	188	KOG0800@1|root,KOG0800@2759|Eukaryota,37ID1@33090|Viridiplantae,3GCYD@35493|Streptophyta,4JRJS@91835|fabids	35493|Streptophyta	O	E3 ubiquitin-protein ligase	-	-	-	-	-	-	-	-	-	-	-	-	zf-RING_2
VLG5_002194	3988.XP_002526408.1	2.43e-34	130	COG0666@1|root,KOG0504@2759|Eukaryota,37T9Q@33090|Viridiplantae,3GF4J@35493|Streptophyta,4JMRW@91835|fabids	35493|Streptophyta	L	Ankyrin repeat-containing protein At3g12360-like	-	-	-	-	-	-	-	-	-	-	-	-	Ank_2,PGG
VLG5_000302	2711.XP_006484706.1	1.08e-10	62	2E5FT@1|root,2SC9I@2759|Eukaryota,37W29@33090|Viridiplantae,3GJJR@35493|Streptophyta	35493|Streptophyta	S	DNA polymerase delta subunit	-	GO:0000228,GO:0000731,GO:0003674,GO:0003824,GO:0003887,GO:0005575,GO:0005622,GO:0005623,GO:0005634,GO:0005657,GO:0005694,GO:0006139,GO:0006259,GO:0006260,GO:0006261,GO:0006281,GO:0006725,GO:0006807,GO:0006950,GO:0006974,GO:0008150,GO:0008152,GO:0009058,GO:0009059,GO:0009987,GO:0016740,GO:0016772,GO:0016779,GO:0018130,GO:0019438,GO:0030894,GO:0031974,GO:0031981,GO:0032991,GO:0032993,GO:0033554,GO:…	-	ko:K03505	ko00230,ko00240,ko01100,ko03030,ko03410,ko03420,ko03430,ko03440,ko05166,map00230,map00240,map01100,map03030,map03410,map03420,map03430,map03440,map05166	M00262	R00375,R00376,R00377,R00378	RC02795	ko00000,ko00001,ko00002,ko03032,ko03400	-	-	-	DNA_pol_delta_4
VLG5_000312	102107.XP_008240297.1	1.03e-71	227	28IIJ@1|root,2RH1U@2759|Eukaryota,37SFD@33090|Viridiplantae,3GXPR@35493|Streptophyta,4JSN3@91835|fabids	35493|Streptophyta	S	S-adenosylmethionine-dependent methyltransferase	-	-	2.1.1.278	ko:K18848	-	-	-	-	ko00000,ko01000	-	-	-	Methyltransf_7
VLG5_001627	57918.XP_004297444.1	6.79e-117	348	COG3491@1|root,KOG0143@2759|Eukaryota,37NM9@33090|Viridiplantae,3GC65@35493|Streptophyta,4JFFZ@91835|fabids	35493|Streptophyta	Q	Belongs to the iron ascorbate-dependent oxidoreductase family	-	-	-	-	-	-	-	-	-	-	-	-	2OG-FeII_Oxy,DIOX_N
VLG5_000324	3760.EMJ13096	2.34e-94	285	2AZ2P@1|root,2S04U@2759|Eukaryota,37V15@33090|Viridiplantae,3GIZA@35493|Streptophyta,4JQMP@91835|fabids	35493|Streptophyta	-	-	-	-	-	-	-	-	-	-	-	-	-	-	PPR
VLG5_002044	981085.XP_010091034.1	1.67e-61	201	COG4870@1|root,KOG1543@2759|Eukaryota,37RR0@33090|Viridiplantae,3GCD2@35493|Streptophyta,4JSEF@91835|fabids	35493|Streptophyta	O	anther wall tapetum development	-	GO:0000003,GO:0000323,GO:0000325,GO:0002376,GO:0003006,GO:0003674,GO:0003824,GO:0004175,GO:0004197,GO:0005575,GO:0005576,GO:0005615,GO:0005618,GO:0005622,GO:0005623,GO:0005737,GO:0005764,GO:0005773,GO:0005783,GO:0006508,GO:0006807,GO:0006950,GO:0006952,GO:0006955,GO:0007275,GO:0008150,GO:0008152,GO:0008219,GO:0008233,GO:0008234,GO:0009056,GO:0009057,GO:0009505,GO:0009555,GO:0009605,GO:0009607,GO:…	3.4.22.15	ko:K01365	ko04140,ko04142,ko04145,ko04210,ko04612,ko05205,ko05323,ko05418,map04140,map04142,map04145,map04210,map04612,map05205,map05323,map05418	-	-	-	ko00000,ko00001,ko00537,ko01000,ko01002,ko03110	-	-	-	Inhibitor_I29,Peptidase_C1
VLG5_001186	3750.XP_008349843.1	1.14e-17	84	COG2130@1|root,KOG1196@2759|Eukaryota,37RGX@33090|Viridiplantae,3G9DY@35493|Streptophyta,4JFKZ@91835|fabids	35493|Streptophyta	S	2-alkenal reductase (NADP( )-dependent)-like	-	-	-	-	-	-	-	-	-	-	-	-	ADH_N_2,ADH_zinc_N
VLG5_001140	3827.XP_004505154.1	1.62e-55	184	2C0I1@1|root,2QVEI@2759|Eukaryota,37QR7@33090|Viridiplantae,3GH5X@35493|Streptophyta,4JPC7@91835|fabids	35493|Streptophyta	-	-	-	-	-	-	-	-	-	-	-	-	-	-	-
VLG5_000717	3760.EMJ13670	7.91e-13	70.1	COG5147@1|root,KOG0048@2759|Eukaryota,37ZSM@33090|Viridiplantae,3GJP2@35493|Streptophyta	35493|Streptophyta	K	Myb-related protein	-	GO:0000981,GO:0000988,GO:0000989,GO:0001067,GO:0001076,GO:0001134,GO:0001135,GO:0003674,GO:0003676,GO:0003677,GO:0003700,GO:0005488,GO:0005575,GO:0005622,GO:0005623,GO:0005634,GO:0006355,GO:0006357,GO:0006950,GO:0008150,GO:0009266,GO:0009409,GO:0009628,GO:0009889,GO:0009891,GO:0009893,GO:0009987,GO:0010468,GO:0010556,GO:0010557,GO:0010604,GO:0010628,GO:0019219,GO:0019222,GO:0030154,GO:0031323,GO:…	-	ko:K09422	-	-	-	-	ko00000,ko03000	-	-	-	Myb_DNA-binding
VLG5_002098	981085.XP_010096529.1	6.1e-198	572	28JR7@1|root,2QS4M@2759|Eukaryota,37K64@33090|Viridiplantae,3GFM5@35493|Streptophyta,4JH6M@91835|fabids	35493|Streptophyta	G	GDP-fucose protein O-fucosyltransferase	-	GO:0003674,GO:0003824,GO:0006464,GO:0006486,GO:0006493,GO:0006807,GO:0008150,GO:0008152,GO:0008417,GO:0009058,GO:0009059,GO:0009100,GO:0009101,GO:0009987,GO:0016740,GO:0016757,GO:0016758,GO:0019538,GO:0034645,GO:0036065,GO:0036066,GO:0036211,GO:0043170,GO:0043412,GO:0043413,GO:0044237,GO:0044238,GO:0044249,GO:0044260,GO:0044267,GO:0046922,GO:0070085,GO:0071704,GO:0140096,GO:1901135,GO:1901137,GO:…	2.4.1.221	ko:K03691	ko00514,map00514	-	R09295	-	ko00000,ko00001,ko01000,ko01003	-	GT65,GT68	-	O-FucT
VLG5_000678	3750.XP_008355945.1	2.75e-42	155	COG0515@1|root,2QWDY@2759|Eukaryota,37QJ4@33090|Viridiplantae,3G71R@35493|Streptophyta,4JRC0@91835|fabids	35493|Streptophyta	T	Cysteine-rich receptor-like protein kinase	-	GO:0001101,GO:0003674,GO:0003824,GO:0004672,GO:0004674,GO:0005575,GO:0005622,GO:0005623,GO:0005737,GO:0005773,GO:0005886,GO:0006464,GO:0006468,GO:0006793,GO:0006796,GO:0006807,GO:0008150,GO:0008152,GO:0009719,GO:0009725,GO:0009737,GO:0009987,GO:0010033,GO:0016020,GO:0016301,GO:0016310,GO:0016740,GO:0016772,GO:0016773,GO:0019538,GO:0033993,GO:0036211,GO:0042221,GO:0043170,GO:0043226,GO:0043227,GO:…	2.7.11.1	ko:K04733	ko04010,ko04064,ko04620,ko04621,ko04624,ko04722,ko05133,ko05140,ko05142,ko05145,ko05152,ko05162,ko05164,map04010,map04064,map04620,map04621,map04624,map04722,map05133,map05140,map05142,map05145,map05152,map05162,map05164	M00686	-	-	ko00000,ko00001,ko00002,ko01000,ko01001	-	-	-	Pkinase,Pkinase_Tyr,Stress-antifung
VLG5_001963	29760.VIT_00s2207g00010.t01	1.83e-11	64.3	COG4284@1|root,KOG2388@2759|Eukaryota,37PUN@33090|Viridiplantae,3GG6U@35493|Streptophyta	35493|Streptophyta	M	UDP-N-acetylglucosamine	-	GO:0000003,GO:0003006,GO:0003674,GO:0003824,GO:0003977,GO:0005575,GO:0005622,GO:0005623,GO:0005737,GO:0005829,GO:0005886,GO:0006040,GO:0006047,GO:0006048,GO:0006139,GO:0006725,GO:0006793,GO:0006807,GO:0007275,GO:0008150,GO:0008152,GO:0009058,GO:0009225,GO:0009226,GO:0009553,GO:0009555,GO:0009790,GO:0009791,GO:0009793,GO:0009987,GO:0010154,GO:0016020,GO:0016740,GO:0016772,GO:0016779,GO:0018130,GO:…	2.7.7.23,2.7.7.83	ko:K00972	ko00520,ko01100,ko01130,map00520,map01100,map01130	M00361,M00362	R00416	RC00002	ko00000,ko00001,ko00002,ko01000	-	-	-	UDPGP
VLG5_000636	981085.XP_010103954.1	2.12e-45	168	COG0515@1|root,2QWDY@2759|Eukaryota,37QJ4@33090|Viridiplantae,3G71R@35493|Streptophyta,4JSFW@91835|fabids	35493|Streptophyta	T	Cysteine-rich receptor-like protein kinase	-	GO:0003674,GO:0003824,GO:0004672,GO:0004674,GO:0005575,GO:0005623,GO:0005886,GO:0006464,GO:0006468,GO:0006793,GO:0006796,GO:0006807,GO:0006950,GO:0006952,GO:0008150,GO:0008152,GO:0009605,GO:0009607,GO:0009617,GO:0009987,GO:0016020,GO:0016301,GO:0016310,GO:0016740,GO:0016772,GO:0016773,GO:0019538,GO:0036211,GO:0042742,GO:0043170,GO:0043207,GO:0043412,GO:0044237,GO:0044238,GO:0044260,GO:0044267,GO:…	-	-	-	-	-	-	-	-	-	-	Pkinase,Pkinase_Tyr,Stress-antifung
VLG5_001070	3656.XP_008459141.1	0	1199	COG1874@1|root,KOG0496@2759|Eukaryota,37RYU@33090|Viridiplantae,3GH7F@35493|Streptophyta,4JIBG@91835|fabids	35493|Streptophyta	G	beta-galactosidase	-	-	-	-	-	-	-	-	-	-	-	-	Gal_Lectin,Glyco_hydro_35
VLG5_001088	3694.POPTR_0001s03660.1	1.13e-12	70.5	COG0451@1|root,KOG1502@2759|Eukaryota,37KK8@33090|Viridiplantae,3G7E0@35493|Streptophyta,4JS3A@91835|fabids	35493|Streptophyta	V	Cinnamoyl-CoA reductase	CCR2	GO:0003674,GO:0003824,GO:0005575,GO:0005622,GO:0005623,GO:0005737,GO:0005829,GO:0006725,GO:0006950,GO:0007623,GO:0008150,GO:0008152,GO:0009058,GO:0009266,GO:0009409,GO:0009628,GO:0009698,GO:0009699,GO:0009808,GO:0009809,GO:0009987,GO:0016491,GO:0016620,GO:0016621,GO:0016903,GO:0019438,GO:0019748,GO:0042752,GO:0042754,GO:0044237,GO:0044249,GO:0044424,GO:0044444,GO:0044464,GO:0044550,GO:0048511,GO:…	1.2.1.44	ko:K09753	ko00940,ko01100,ko01110,map00940,map01100,map01110	M00039	R01615,R01941,R02193,R02220,R02506,R06569	RC00004,RC00566	ko00000,ko00001,ko00002,ko01000	-	-	-	Epimerase
VLG5_001086	981085.XP_010101467.1	1.83e-15	77	COG0451@1|root,KOG1502@2759|Eukaryota,37KK8@33090|Viridiplantae,3G7E0@35493|Streptophyta,4JS3A@91835|fabids	35493|Streptophyta	V	Cinnamoyl-CoA reductase	-	-	1.2.1.44	ko:K09753	ko00940,ko01100,ko01110,map00940,map01100,map01110	M00039	R01615,R01941,R02193,R02220,R02506,R06569	RC00004,RC00566	ko00000,ko00001,ko00002,ko01000	-	-	-	Epimerase
VLG5_001055	3760.EMJ16682	3.29e-28	114	COG0287@1|root,KOG2380@2759|Eukaryota,37J0G@33090|Viridiplantae,3GGAK@35493|Streptophyta	35493|Streptophyta	E	Arogenate dehydrogenase	-	GO:0005575,GO:0005622,GO:0005623,GO:0005737,GO:0009507,GO:0009536,GO:0043226,GO:0043227,GO:0043229,GO:0043231,GO:0044424,GO:0044444,GO:0044464	1.3.1.78	ko:K15227	ko00400,ko01100,ko01110,ko01230,map00400,map01100,map01110,map01230	M00040	R00733	RC00125	ko00000,ko00001,ko00002,ko01000	-	-	-	PDH
VLG5_001069	29760.VIT_09s0002g08830.t01	7.99e-64	208	2C3FQ@1|root,2S2TQ@2759|Eukaryota,37VDW@33090|Viridiplantae,3GI25@35493|Streptophyta	35493|Streptophyta	K	ethylene-responsive transcription factor	-	GO:0000160,GO:0003674,GO:0003700,GO:0006355,GO:0007154,GO:0007165,GO:0008150,GO:0009719,GO:0009723,GO:0009725,GO:0009755,GO:0009873,GO:0009889,GO:0009987,GO:0010033,GO:0010468,GO:0010556,GO:0019219,GO:0019222,GO:0023052,GO:0031323,GO:0031326,GO:0032870,GO:0035556,GO:0042221,GO:0050789,GO:0050794,GO:0050896,GO:0051171,GO:0051252,GO:0051716,GO:0060255,GO:0065007,GO:0070887,GO:0071310,GO:0071369,GO:…	-	-	-	-	-	-	-	-	-	-	AP2
VLG5_000199	4098.XP_009614208.1	6.12e-24	101	KOG1812@1|root,KOG1812@2759|Eukaryota,37SVK@33090|Viridiplantae,3GA86@35493|Streptophyta,44ECX@71274|asterids	35493|Streptophyta	O	In Between Ring fingers	-	GO:0000151,GO:0000209,GO:0003674,GO:0003824,GO:0004842,GO:0005488,GO:0005515,GO:0005575,GO:0005622,GO:0005623,GO:0005737,GO:0005794,GO:0006464,GO:0006807,GO:0008150,GO:0008152,GO:0009893,GO:0009894,GO:0009896,GO:0009987,GO:0010604,GO:0012505,GO:0016567,GO:0016740,GO:0019222,GO:0019538,GO:0019787,GO:0019899,GO:0030162,GO:0031323,GO:0031325,GO:0031329,GO:0031331,GO:0031624,GO:0032268,GO:0032270,GO:…	2.3.2.31	ko:K11975	-	-	-	-	ko00000,ko01000,ko04121	-	-	-	IBR,zf-C3HC4
VLG5_001040	3847.GLYMA08G22680.1	2.23e-10	62.4	2BD6H@1|root,2S038@2759|Eukaryota,37V3W@33090|Viridiplantae,3GJ7J@35493|Streptophyta,4JQEM@91835|fabids	35493|Streptophyta	S	Cucumber peeling cupredoxin-like	-	-	-	-	-	-	-	-	-	-	-	-	Cu_bind_like
VLG5_001496	981085.XP_010087695.1	9.24e-58	197	COG0666@1|root,KOG0504@2759|Eukaryota,37KPV@33090|Viridiplantae,3GH3Z@35493|Streptophyta,4JPBP@91835|fabids	35493|Streptophyta	S	ankyrin repeat-containing protein	-	-	-	-	-	-	-	-	-	-	-	-	Ank,Ank_2,Ank_3,Ank_4,PGG
VLG5_001010	3656.XP_008461072.1	5.26e-53	185	COG0415@1|root,KOG0133@2759|Eukaryota,37IU7@33090|Viridiplantae,3GBHY@35493|Streptophyta,4JJ1N@91835|fabids	35493|Streptophyta	LT	FAD binding domain of DNA photolyase	UVR3	GO:0003674,GO:0003824,GO:0003913,GO:0003914,GO:0008150,GO:0009314,GO:0009411,GO:0009416,GO:0009628,GO:0016829,GO:0016830,GO:0050896,GO:0140097	-	ko:K02295	ko04710,map04710	-	-	-	ko00000,ko00001,ko03400	-	-	-	DNA_photolyase,FAD_binding_7
VLG5_001498	981085.XP_010087695.1	2.18e-63	213	COG0666@1|root,KOG0504@2759|Eukaryota,37KPV@33090|Viridiplantae,3GH3Z@35493|Streptophyta,4JPBP@91835|fabids	35493|Streptophyta	S	ankyrin repeat-containing protein	-	-	-	-	-	-	-	-	-	-	-	-	Ank,Ank_2,Ank_3,Ank_4,PGG
VLG5_001492	3988.XP_002521355.1	1.65e-29	121	COG0666@1|root,KOG0504@2759|Eukaryota,37KPV@33090|Viridiplantae,3GH3Z@35493|Streptophyta,4JPBP@91835|fabids	35493|Streptophyta	S	ankyrin repeat-containing protein	-	-	-	-	-	-	-	-	-	-	-	-	Ank,Ank_2,Ank_4,PGG
VLG5_001097	85681.XP_006427659.1	3.99e-18	81.6	28N77@1|root,2SQC6@2759|Eukaryota,37ZXK@33090|Viridiplantae,3GPP3@35493|Streptophyta	35493|Streptophyta	S	Transferase family	-	-	2.3.1.133	ko:K13065	ko00940,ko00941,ko00945,ko01100,ko01110,map00940,map00941,map00945,map01100,map01110	M00039	R01945,R02416,R07432,R07433	RC00004,RC00055,RC02864	ko00000,ko00001,ko00002,ko01000	-	-	-	Transferase
VLG5_000542	4565.Traes_3AL_FC5D07ABB.1	7.37e-16	80.1	COG1404@1|root,2QRC5@2759|Eukaryota,37MCD@33090|Viridiplantae,3GE6Z@35493|Streptophyta,3KWJA@4447|Liliopsida,3IEI0@38820|Poales	35493|Streptophyta	O	subtilisin-like protease	-	GO:0003674,GO:0003824,GO:0004175,GO:0004252,GO:0006508,GO:0006807,GO:0008150,GO:0008152,GO:0008233,GO:0008236,GO:0016787,GO:0017171,GO:0019538,GO:0043170,GO:0044238,GO:0070011,GO:0071704,GO:0140096,GO:1901564	-	-	-	-	-	-	-	-	-	-	Inhibitor_I9,PA,Peptidase_S8
VLG5_001405	102107.XP_008228409.1	3.22e-45	173	2CN1E@1|root,2QTA3@2759|Eukaryota,37QHH@33090|Viridiplantae,3GH5P@35493|Streptophyta,4JQP0@91835|fabids	35493|Streptophyta	-	-	-	-	-	-	-	-	-	-	-	-	-	-	-
VLG5_000583	4081.Solyc08g077370.2.1	9.93e-16	76.6	2CMT6@1|root,2QRUH@2759|Eukaryota,37R2I@33090|Viridiplantae,3GACJ@35493|Streptophyta,44P4C@71274|asterids	35493|Streptophyta	S	Purine nucleobase transmembrane transport	-	-	-	-	-	-	-	-	-	-	-	-	PUNUT
VLG6_001889	2711.XP_006465491.1	8.42e-199	614	COG2801@1|root,KOG4658@1|root,KOG0017@2759|Eukaryota,KOG4658@2759|Eukaryota,37RIF@33090|Viridiplantae,3G9AM@35493|Streptophyta	35493|Streptophyta	K	cysteine-rich RLK (RECEPTOR-like protein kinase) 8	-	-	-	-	-	-	-	-	-	-	-	-	RVT_2,Retrotran_gag_2,gag_pre-integrs,rve
VLG6_001898	29730.Gorai.007G064600.1	9.77e-31	108	2BXFX@1|root,2SBZI@2759|Eukaryota,37WWJ@33090|Viridiplantae,3GKVS@35493|Streptophyta	35493|Streptophyta	S	IDA-LIKE 2-like	-	-	-	-	-	-	-	-	-	-	-	-	-
VLG6_000535	3649.evm.model.supercontig_6.26	5.29e-158	476	KOG1949@1|root,KOG1949@2759|Eukaryota,37QF2@33090|Viridiplantae,3GAHI@35493|Streptophyta,3HMPH@3699|Brassicales	35493|Streptophyta	S	Condensin II non structural maintenance of chromosomes subunit	-	-	-	ko:K11492	-	-	-	-	ko00000,ko03036	-	-	-	Condensin2nSMC
VLG6_000103	3641.EOX92061	1.28e-31	120	COG0637@1|root,KOG2914@2759|Eukaryota,37PX8@33090|Viridiplantae,3G9AZ@35493|Streptophyta	35493|Streptophyta	S	Haloacid dehalogenase-like hydrolase domain-containing protein	-	-	-	-	-	-	-	-	-	-	-	-	HAD_2
VLG6_001805	225117.XP_009347603.1	5.5e-238	671	KOG4197@1|root,KOG4197@2759|Eukaryota,37SNR@33090|Viridiplantae,3GA6W@35493|Streptophyta,4JD9T@91835|fabids	35493|Streptophyta	S	Pentatricopeptide repeat-containing protein	-	GO:0003674,GO:0003676,GO:0003723,GO:0003824,GO:0004518,GO:0004519,GO:0005488,GO:0005575,GO:0005622,GO:0005623,GO:0006139,GO:0006725,GO:0006807,GO:0008150,GO:0008152,GO:0009451,GO:0009987,GO:0016070,GO:0016787,GO:0016788,GO:0034641,GO:0043170,GO:0043226,GO:0043227,GO:0043229,GO:0043231,GO:0043412,GO:0044237,GO:0044238,GO:0044424,GO:0044464,GO:0046483,GO:0071704,GO:0090304,GO:0090305,GO:0097159,GO:…	-	-	-	-	-	-	-	-	-	-	PPR,PPR_2
VLG6_000969	3760.EMJ19540	3.98e-151	434	2CK6P@1|root,2QPRF@2759|Eukaryota,37JZV@33090|Viridiplantae,3G79S@35493|Streptophyta,4JI9U@91835|fabids	35493|Streptophyta	-	-	-	-	-	-	-	-	-	-	-	-	-	-	-
VLG6_001810	28532.XP_010521472.1	3.45e-12	68.9	KOG1192@1|root,KOG1192@2759|Eukaryota,37M0D@33090|Viridiplantae,3GDZJ@35493|Streptophyta,3HMKS@3699|Brassicales	35493|Streptophyta	CG	Belongs to the UDP-glycosyltransferase family	UGT72E1	GO:0003674,GO:0003824,GO:0005575,GO:0005622,GO:0005623,GO:0006725,GO:0008150,GO:0008152,GO:0008194,GO:0009698,GO:0009808,GO:0009987,GO:0016740,GO:0016757,GO:0016758,GO:0019748,GO:0035251,GO:0043226,GO:0043227,GO:0043229,GO:0043231,GO:0044237,GO:0044424,GO:0044464,GO:0046527,GO:0047209,GO:0071704,GO:0080043,GO:0080044,GO:1901360	2.4.1.111	ko:K12356	ko00940,map00940	-	R02594,R03605,R04005	RC00005,RC00171	ko00000,ko00001,ko01000,ko01003	-	-	-	UDPGT
VLG6_001819	3750.XP_008393333.1	1.21e-112	340	KOG1192@1|root,KOG1192@2759|Eukaryota,37M0D@33090|Viridiplantae,3GDZJ@35493|Streptophyta,4JMJZ@91835|fabids	35493|Streptophyta	CG	Belongs to the UDP-glycosyltransferase family	-	GO:0003674,GO:0003824,GO:0005575,GO:0005622,GO:0005623,GO:0008194,GO:0016740,GO:0016757,GO:0016758,GO:0035251,GO:0043226,GO:0043227,GO:0043229,GO:0043231,GO:0044424,GO:0044464,GO:0046527,GO:0080043,GO:0080044	2.4.1.111,2.4.1.218	ko:K08237,ko:K12356	ko00940,map00940	-	R02594,R03605,R04005	RC00005,RC00171	ko00000,ko00001,ko01000,ko01003	-	GT1	-	UDPGT
VLG6_001848	981085.XP_010106906.1	1.79e-13	69.3	2ETRU@1|root,2SW1G@2759|Eukaryota,3828X@33090|Viridiplantae,3GR7W@35493|Streptophyta	35493|Streptophyta	-	-	-	-	-	-	-	-	-	-	-	-	-	-	-
VLG6_001824	3760.EMJ05078	4.69e-214	607	KOG1192@1|root,KOG1192@2759|Eukaryota,37M0D@33090|Viridiplantae,3GDZJ@35493|Streptophyta,4JMJZ@91835|fabids	35493|Streptophyta	CG	Belongs to the UDP-glycosyltransferase family	-	GO:0003674,GO:0003824,GO:0005575,GO:0005622,GO:0005623,GO:0008194,GO:0016740,GO:0016757,GO:0016758,GO:0035251,GO:0043226,GO:0043227,GO:0043229,GO:0043231,GO:0044424,GO:0044464,GO:0046527,GO:0080043,GO:0080044	2.4.1.111,2.4.1.218	ko:K08237,ko:K12356	ko00940,map00940	-	R02594,R03605,R04005	RC00005,RC00171	ko00000,ko00001,ko01000,ko01003	-	GT1	-	UDPGT
VLG6_000505	3649.evm.model.supercontig_85.62	1.95e-27	114	KOG2000@1|root,KOG2000@2759|Eukaryota,37Q6F@33090|Viridiplantae,3G87I@35493|Streptophyta,3HQ9Q@3699|Brassicales	35493|Streptophyta	Z	Gamma-tubulin complex is necessary for microtubule nucleation at the centrosome	-	GO:0000003,GO:0000226,GO:0000278,GO:0000280,GO:0000923,GO:0000930,GO:0003674,GO:0005198,GO:0005200,GO:0005488,GO:0005515,GO:0005575,GO:0005622,GO:0005623,GO:0005634,GO:0005635,GO:0005737,GO:0005815,GO:0005819,GO:0005856,GO:0005874,GO:0005881,GO:0005886,GO:0005938,GO:0006996,GO:0007010,GO:0007017,GO:0007020,GO:0007049,GO:0007051,GO:0007052,GO:0008092,GO:0008150,GO:0008275,GO:0009605,GO:0009607,GO:…	-	ko:K16570	-	-	-	-	ko00000,ko03036,ko04147,ko04812	-	-	-	Spc97_Spc98
VLG6_001838	3760.EMJ06139	3.39e-81	268	KOG4197@1|root,KOG4197@2759|Eukaryota,37IIK@33090|Viridiplantae,3G9MG@35493|Streptophyta,4JM4C@91835|fabids	35493|Streptophyta	S	Pentatricopeptide repeat-containing protein At5g67570	-	GO:0003674,GO:0003676,GO:0003723,GO:0003824,GO:0004518,GO:0004519,GO:0005488,GO:0005575,GO:0005622,GO:0005623,GO:0005737,GO:0006139,GO:0006351,GO:0006725,GO:0006807,GO:0006996,GO:0008150,GO:0008152,GO:0009058,GO:0009059,GO:0009451,GO:0009507,GO:0009536,GO:0009657,GO:0009658,GO:0009987,GO:0010467,GO:0016043,GO:0016070,GO:0016787,GO:0016788,GO:0018130,GO:0019438,GO:0032774,GO:0034641,GO:0034645,GO:…	-	-	-	-	-	-	-	-	-	-	PPR,PPR_2,PPR_3
VLG6_000904	981085.XP_010095709.1	6.31e-37	130	2E5QY@1|root,2SCHU@2759|Eukaryota,37XXI@33090|Viridiplantae,3GMDV@35493|Streptophyta,4JV4U@91835|fabids	35493|Streptophyta	-	-	-	-	-	-	-	-	-	-	-	-	-	-	-
VLG6_000032	981085.XP_010111784.1	4.67e-25	99.4	COG0566@1|root,KOG2506@2759|Eukaryota	2759|Eukaryota	J	RNA methyltransferase activity	RNMTL1	GO:0000154,GO:0000451,GO:0001510,GO:0003674,GO:0003824,GO:0005575,GO:0005622,GO:0005623,GO:0005737,GO:0005739,GO:0005759,GO:0006139,GO:0006364,GO:0006396,GO:0006725,GO:0006807,GO:0008150,GO:0008152,GO:0008168,GO:0008171,GO:0008173,GO:0008649,GO:0008757,GO:0009451,GO:0009987,GO:0010467,GO:0016070,GO:0016072,GO:0016435,GO:0016740,GO:0016741,GO:0022613,GO:0031167,GO:0031974,GO:0032259,GO:0034470,GO:…	1.2.1.18,1.2.1.27,5.2.1.8	ko:K00140,ko:K03437,ko:K03768,ko:K20095	ko00280,ko00410,ko00562,ko00640,ko01100,ko01200,map00280,map00410,map00562,map00640,map01100,map01200	M00013	R00705,R00706,R00922,R00935	RC00004,RC02723,RC02817	ko00000,ko00001,ko00002,ko01000,ko03009,ko03016,ko03110	-	-	-	SpoU_methylase
VLG6_000025	102107.XP_008241487.1	1.41e-205	584	28P2T@1|root,2QVP8@2759|Eukaryota,37KS5@33090|Viridiplantae,3GA4A@35493|Streptophyta,4JH9Y@91835|fabids	35493|Streptophyta	G	Acetyltransferase	-	-	-	-	-	-	-	-	-	-	-	-	Transferase
VLG6_000079	3711.Bra007095.1-P	2.6e-13	68.9	COG0534@1|root,KOG1347@2759|Eukaryota,37M3D@33090|Viridiplantae,3G7HK@35493|Streptophyta,3HQH5@3699|Brassicales	35493|Streptophyta	V	Belongs to the multi antimicrobial extrusion (MATE) (TC 2.A.66.1) family	-	GO:0003674,GO:0005215,GO:0006810,GO:0006855,GO:0008150,GO:0015238,GO:0015893,GO:0022857,GO:0042221,GO:0042493,GO:0050896,GO:0051179,GO:0051234,GO:0055085	-	ko:K03327	-	-	-	-	ko00000,ko02000	2.A.66.1	-	-	MatE
VLG6_000671	3760.EMJ05342	4.52e-27	112	COG0110@1|root,KOG4750@2759|Eukaryota,37Q64@33090|Viridiplantae,3GA20@35493|Streptophyta,4JENQ@91835|fabids	35493|Streptophyta	E	Serine acetyltransferase	-	GO:0000096,GO:0000097,GO:0000103,GO:0003674,GO:0003824,GO:0005575,GO:0005622,GO:0005623,GO:0005737,GO:0005829,GO:0006082,GO:0006520,GO:0006534,GO:0006790,GO:0006807,GO:0008150,GO:0008152,GO:0008374,GO:0008652,GO:0009001,GO:0009058,GO:0009069,GO:0009070,GO:0009987,GO:0016053,GO:0016407,GO:0016412,GO:0016413,GO:0016740,GO:0016746,GO:0016747,GO:0019344,GO:0019752,GO:0043436,GO:0044237,GO:0044238,GO:…	2.3.1.30	ko:K00640	ko00270,ko00920,ko01100,ko01110,ko01120,ko01200,ko01230,ko05111,map00270,map00920,map01100,map01110,map01120,map01200,map01230,map05111	M00021	R00586	RC00004,RC00041	ko00000,ko00001,ko00002,ko01000	-	-	-	Hexapep,SATase_N
VLG6_000206	71139.XP_010030390.1	3.19e-114	336	2CIVD@1|root,2QSCG@2759|Eukaryota,37R5C@33090|Viridiplantae,3GG6I@35493|Streptophyta	35493|Streptophyta	S	mizu-kussei	-	-	-	-	-	-	-	-	-	-	-	-	DUF617
VLG6_000661	3760.EMJ03281	1.01e-35	136	COG4243@1|root,2QRER@2759|Eukaryota,37R21@33090|Viridiplantae,3GA2R@35493|Streptophyta,4JFH8@91835|fabids	35493|Streptophyta	S	Thiol-disulfide oxidoreductase	-	GO:0003674,GO:0003824,GO:0003955,GO:0005575,GO:0005622,GO:0005623,GO:0005737,GO:0006091,GO:0008150,GO:0008152,GO:0009507,GO:0009536,GO:0009987,GO:0010207,GO:0015979,GO:0016043,GO:0016491,GO:0016651,GO:0016655,GO:0019684,GO:0022607,GO:0034622,GO:0043226,GO:0043227,GO:0043229,GO:0043231,GO:0043933,GO:0044085,GO:0044237,GO:0044424,GO:0044444,GO:0044464,GO:0055114,GO:0065003,GO:0071840	-	-	-	-	-	-	-	-	-	-	VKOR
VLG6_001564	29760.VIT_00s0976g00010.t01	2.24e-113	339	28NCI@1|root,2QUY1@2759|Eukaryota,37QEN@33090|Viridiplantae,3GFDN@35493|Streptophyta	35493|Streptophyta	S	BEST Arabidopsis thaliana protein match is Arabidopsis protein of	-	-	-	-	-	-	-	-	-	-	-	-	DUF241
VLG6_001571	3760.EMJ03730	5.14e-24	107	2A3V9@1|root,2RY64@2759|Eukaryota,37NUW@33090|Viridiplantae,3GIA3@35493|Streptophyta,4JED2@91835|fabids	35493|Streptophyta	S	f-box protein	-	GO:0000724,GO:0000725,GO:0003674,GO:0003676,GO:0003677,GO:0003678,GO:0003824,GO:0004003,GO:0004386,GO:0005488,GO:0005575,GO:0005622,GO:0005623,GO:0005634,GO:0005694,GO:0005737,GO:0006109,GO:0006139,GO:0006259,GO:0006281,GO:0006302,GO:0006310,GO:0006725,GO:0006807,GO:0006950,GO:0006974,GO:0006996,GO:0008026,GO:0008094,GO:0008150,GO:0008152,GO:0009378,GO:0009889,GO:0009890,GO:0009892,GO:0009987,GO:…	-	-	-	-	-	-	-	-	-	-	DUF295,F-box
VLG6_000243	102107.XP_008218912.1	6.94e-17	75.1	2CMA4@1|root,2QPS0@2759|Eukaryota,37M9N@33090|Viridiplantae,3G75A@35493|Streptophyta,4JHAE@91835|fabids	35493|Streptophyta	S	Alkaline neutral invertase	CINV1	GO:0000302,GO:0003674,GO:0003824,GO:0004553,GO:0004564,GO:0004575,GO:0005575,GO:0005622,GO:0005623,GO:0005634,GO:0005737,GO:0005829,GO:0005886,GO:0005975,GO:0005984,GO:0005985,GO:0005987,GO:0006082,GO:0006520,GO:0006807,GO:0006950,GO:0006979,GO:0007275,GO:0008150,GO:0008152,GO:0009056,GO:0009311,GO:0009313,GO:0009555,GO:0009636,GO:0009653,GO:0009791,GO:0009987,GO:0010015,GO:0010035,GO:0010101,GO:…	-	-	-	-	-	-	-	-	-	-	Glyco_hydro_100
VLG6_001966	981085.XP_010099887.1	3.94e-19	87.8	2DCKS@1|root,2S5K9@2759|Eukaryota,37WI7@33090|Viridiplantae,3GKEB@35493|Streptophyta,4JR28@91835|fabids	35493|Streptophyta	-	-	-	-	-	-	-	-	-	-	-	-	-	-	DUF5306
VLG6_001035	225117.XP_009340456.1	6.21e-44	154	COG1073@1|root,KOG4391@2759|Eukaryota,37KB9@33090|Viridiplantae,3G9K6@35493|Streptophyta,4JI9V@91835|fabids	35493|Streptophyta	S	Prolyl oligopeptidase family	-	GO:0005575,GO:0005622,GO:0005623,GO:0005737,GO:0005783,GO:0005886,GO:0007275,GO:0008150,GO:0012505,GO:0016020,GO:0019866,GO:0022622,GO:0031090,GO:0031967,GO:0031975,GO:0032501,GO:0032502,GO:0043226,GO:0043227,GO:0043229,GO:0043231,GO:0044422,GO:0044424,GO:0044444,GO:0044446,GO:0044464,GO:0048364,GO:0048731,GO:0048856,GO:0071944,GO:0099402	-	ko:K06889	-	-	-	-	ko00000	-	-	-	Hydrolase_4,Peptidase_S9
VLG6_001624	71139.XP_010033470.1	1.81e-249	689	COG1089@1|root,KOG1372@2759|Eukaryota,37HE5@33090|Viridiplantae,3G75T@35493|Streptophyta	35493|Streptophyta	G	GDP-mannose 4,6 dehydratase	-	GO:0000902,GO:0003674,GO:0003824,GO:0005575,GO:0005622,GO:0005623,GO:0005737,GO:0005829,GO:0006139,GO:0006725,GO:0006793,GO:0006807,GO:0008150,GO:0008152,GO:0008446,GO:0009058,GO:0009225,GO:0009226,GO:0009653,GO:0009826,GO:0009987,GO:0016043,GO:0016049,GO:0016829,GO:0016835,GO:0016836,GO:0018130,GO:0019438,GO:0032502,GO:0032989,GO:0034641,GO:0034654,GO:0040007,GO:0042350,GO:0042351,GO:0044237,GO:…	4.2.1.47	ko:K01711	ko00051,ko00520,ko01100,map00051,map00520,map01100	-	R00888	RC00402	ko00000,ko00001,ko01000	-	-	-	GDP_Man_Dehyd
VLG6_000356	981085.XP_010099827.1	1.36e-94	284	COG0655@1|root,KOG3135@2759|Eukaryota,37JWV@33090|Viridiplantae,3GFFB@35493|Streptophyta,4JNGA@91835|fabids	35493|Streptophyta	S	Minor allergen Alt a	-	GO:0000166,GO:0003674,GO:0003824,GO:0003955,GO:0005488,GO:0005575,GO:0005622,GO:0005623,GO:0005737,GO:0005886,GO:0008150,GO:0008152,GO:0010181,GO:0016020,GO:0016491,GO:0016651,GO:0016655,GO:0032553,GO:0036094,GO:0043167,GO:0043168,GO:0044424,GO:0044464,GO:0048037,GO:0050662,GO:0055114,GO:0071944,GO:0097159,GO:0097367,GO:1901265,GO:1901363	1.6.5.2	ko:K03809	ko00130,ko01110,map00130,map01110	-	R02964,R03643,R03816	RC00819	ko00000,ko00001,ko01000	-	-	-	FMN_red
VLG6_001665	981085.XP_010089037.1	6.17e-122	358	COG0122@1|root,KOG1918@2759|Eukaryota,37QQ8@33090|Viridiplantae,3GCIN@35493|Streptophyta,4JRXW@91835|fabids	35493|Streptophyta	L	DNA-3-methyladenine glycosylase	-	GO:0003674,GO:0003676,GO:0003677,GO:0003684,GO:0003824,GO:0003905,GO:0005488,GO:0005575,GO:0006139,GO:0006259,GO:0006281,GO:0006284,GO:0006285,GO:0006304,GO:0006307,GO:0006725,GO:0006807,GO:0006950,GO:0006974,GO:0008150,GO:0008152,GO:0008725,GO:0009987,GO:0016787,GO:0016798,GO:0016799,GO:0019104,GO:0032131,GO:0032991,GO:0032993,GO:0033554,GO:0034641,GO:0035510,GO:0043170,GO:0043412,GO:0043733,GO:…	3.2.2.21	ko:K01247	ko03410,map03410	-	-	-	ko00000,ko00001,ko01000,ko03400	-	-	-	HhH-GPD
VLG6_000739	4098.XP_009620131.1	5.34e-12	63.5	COG4826@1|root,KOG2392@2759|Eukaryota,37Y5P@33090|Viridiplantae,3GN3Y@35493|Streptophyta,44PWM@71274|asterids	35493|Streptophyta	V	Belongs to the serpin family	-	GO:0003674,GO:0004857,GO:0004866,GO:0004867,GO:0004869,GO:0005575,GO:0005576,GO:0005615,GO:0005622,GO:0005623,GO:0005737,GO:0008150,GO:0009892,GO:0010466,GO:0010605,GO:0010951,GO:0019222,GO:0030162,GO:0030234,GO:0030414,GO:0031323,GO:0031324,GO:0032268,GO:0032269,GO:0043086,GO:0044092,GO:0044421,GO:0044424,GO:0044464,GO:0045861,GO:0048046,GO:0048519,GO:0048523,GO:0050789,GO:0050790,GO:0050794,GO:…	-	ko:K13963	ko05146,map05146	-	-	-	ko00000,ko00001	-	-	-	Serpin
VLG6_000735	4432.XP_010255122.1	7.98e-19	90.5	COG4826@1|root,KOG2392@2759|Eukaryota,37ITN@33090|Viridiplantae,3GFCA@35493|Streptophyta	35493|Streptophyta	V	Belongs to the serpin family	-	GO:0003674,GO:0004857,GO:0004866,GO:0004867,GO:0004869,GO:0005575,GO:0005576,GO:0005615,GO:0005622,GO:0005623,GO:0005634,GO:0005737,GO:0005829,GO:0006139,GO:0006259,GO:0006281,GO:0006725,GO:0006807,GO:0006950,GO:0006974,GO:0008150,GO:0008152,GO:0009892,GO:0009987,GO:0010466,GO:0010605,GO:0010951,GO:0019222,GO:0030162,GO:0030234,GO:0030414,GO:0031323,GO:0031324,GO:0032268,GO:0032269,GO:0033554,GO:…	1.6.5.3	ko:K05579,ko:K13963,ko:K14297	ko00190,ko01100,ko03013,ko05146,ko05164,map00190,map01100,map03013,map05146,map05164	M00145,M00427	R11945	RC00061	ko00000,ko00001,ko00002,ko01000,ko03019,ko03036	1.I.1	-	-	Serpin
VLG6_000742	3641.EOY23392	2.15e-162	476	COG4886@1|root,KOG0619@2759|Eukaryota,37HGH@33090|Viridiplantae,3GCPP@35493|Streptophyta	35493|Streptophyta	S	BEST Arabidopsis thaliana protein match is Leucine-rich repeat (LRR) family protein (TAIR	-	GO:0000166,GO:0003674,GO:0005488,GO:0005575,GO:0005622,GO:0005623,GO:0005737,GO:0008150,GO:0009507,GO:0009536,GO:0009888,GO:0010073,GO:0032501,GO:0032502,GO:0036094,GO:0043226,GO:0043227,GO:0043229,GO:0043231,GO:0044424,GO:0044444,GO:0044464,GO:0048507,GO:0048856,GO:0097159,GO:1901265,GO:1901363	-	-	-	-	-	-	-	-	-	-	LRRNT_2,LRR_1,LRR_8
VLG6_002095	57918.XP_004288505.1	3.18e-25	111	COG0205@1|root,KOG2440@2759|Eukaryota,37KJQ@33090|Viridiplantae,3GDG9@35493|Streptophyta,4JM0V@91835|fabids	35493|Streptophyta	G	Catalyzes the phosphorylation of D-fructose 6-phosphate to fructose 1,6-bisphosphate by ATP, the first committing step of glycolysis	-	GO:0003674,GO:0003824,GO:0003872,GO:0005575,GO:0005622,GO:0005623,GO:0005737,GO:0005975,GO:0006082,GO:0006090,GO:0006091,GO:0006096,GO:0006139,GO:0006163,GO:0006164,GO:0006165,GO:0006725,GO:0006732,GO:0006733,GO:0006753,GO:0006754,GO:0006757,GO:0006793,GO:0006796,GO:0006807,GO:0008150,GO:0008152,GO:0008443,GO:0009056,GO:0009058,GO:0009108,GO:0009117,GO:0009123,GO:0009124,GO:0009126,GO:0009127,GO:…	2.7.1.11	ko:K00850	ko00010,ko00030,ko00051,ko00052,ko00680,ko01100,ko01110,ko01120,ko01130,ko01200,ko01230,ko03018,ko04152,ko05230,map00010,map00030,map00051,map00052,map00680,map01100,map01110,map01120,map01130,map01200,map01230,map03018,map04152,map05230	M00001,M00345	R00756,R03236,R03237,R03238,R03239,R04779	RC00002,RC00017	ko00000,ko00001,ko00002,ko01000,ko01009,ko03019	-	-	-	PFK
VLG6_002091	57918.XP_004288460.1	7.91e-159	458	KOG0251@1|root,KOG0251@2759|Eukaryota,37QUG@33090|Viridiplantae,3GG8M@35493|Streptophyta,4JD5Q@91835|fabids	35493|Streptophyta	TU	clathrin assembly protein	-	-	-	ko:K20043,ko:K20044	-	-	-	-	ko00000,ko04131	-	-	-	ANTH
VLG6_001580	3641.EOX90747	6.23e-80	239	2AWBH@1|root,2RZ7Q@2759|Eukaryota,37UFA@33090|Viridiplantae,3GIJ4@35493|Streptophyta	35493|Streptophyta	S	protein At4g08330, chloroplastic-like	-	-	-	-	-	-	-	-	-	-	-	-	SelR
VLG6_000265	3827.XP_004503952.1	5.18e-61	197	2BZ6W@1|root,2S2J0@2759|Eukaryota,37V6K@33090|Viridiplantae,3GJSP@35493|Streptophyta,4JPZA@91835|fabids	35493|Streptophyta	S	VQ motif	-	GO:0002218,GO:0002253,GO:0002376,GO:0002682,GO:0002684,GO:0005575,GO:0005622,GO:0005623,GO:0005634,GO:0007154,GO:0007165,GO:0008150,GO:0009870,GO:0009987,GO:0023052,GO:0031347,GO:0031349,GO:0043226,GO:0043227,GO:0043229,GO:0043231,GO:0044424,GO:0044464,GO:0045088,GO:0045089,GO:0048518,GO:0048583,GO:0048584,GO:0050776,GO:0050778,GO:0050789,GO:0050794,GO:0050896,GO:0051716,GO:0065007,GO:0080134	-	ko:K20725	ko04016,map04016	-	-	-	ko00000,ko00001	-	-	-	VQ
VLG6_002004	981085.XP_010091883.1	1.28e-30	113	2D4Z9@1|root,2SWTE@2759|Eukaryota,3826F@33090|Viridiplantae,3GRZ1@35493|Streptophyta,4JV5M@91835|fabids	35493|Streptophyta	K	B3 DNA binding domain	-	-	-	-	-	-	-	-	-	-	-	-	B3
VLG6_001770	3847.GLYMA01G39370.1	2.01e-55	181	2BQ63@1|root,2S4T2@2759|Eukaryota,37WIW@33090|Viridiplantae,3GKGK@35493|Streptophyta,4JUH9@91835|fabids	35493|Streptophyta	S	RALF-like 34	-	GO:0003674,GO:0005102,GO:0005179,GO:0005488,GO:0005515,GO:0005575,GO:0005576,GO:0005911,GO:0007154,GO:0007165,GO:0007267,GO:0008150,GO:0009506,GO:0009966,GO:0009987,GO:0010469,GO:0010646,GO:0019722,GO:0019932,GO:0023051,GO:0023052,GO:0030054,GO:0030545,GO:0035556,GO:0048018,GO:0048046,GO:0048583,GO:0050789,GO:0050794,GO:0050896,GO:0051716,GO:0055044,GO:0065007,GO:0065009,GO:0098772	-	-	-	-	-	-	-	-	-	-	RALF
VLG6_001745	3649.evm.model.supercontig_6.401	1.28e-14	74.7	COG4886@1|root,2QSSA@2759|Eukaryota,37R4B@33090|Viridiplantae,3GC2G@35493|Streptophyta,3HSEI@3699|Brassicales	35493|Streptophyta	S	disease resistance	-	-	-	ko:K19613	ko04014,map04014	-	-	-	ko00000,ko00001	-	-	-	NB-ARC,RPW8
VLG6_000424	3649.evm.model.supercontig_55.170	7.76e-33	122	KOG2659@1|root,KOG2659@2759|Eukaryota,37PWP@33090|Viridiplantae,3GEJR@35493|Streptophyta,3HP6J@3699|Brassicales	35493|Streptophyta	Z	BEST Arabidopsis thaliana protein match is	-	-	-	-	-	-	-	-	-	-	-	-	CLTH
VLG6_001784	3827.XP_004492513.1	1.79e-195	563	KOG1192@1|root,KOG1192@2759|Eukaryota,37J9T@33090|Viridiplantae,3GE9Z@35493|Streptophyta,4JRZ6@91835|fabids	35493|Streptophyta	CG	Belongs to the UDP-glycosyltransferase family	-	-	2.4.1.272	ko:K18822	-	-	-	-	ko00000,ko01000	-	-	-	UDPGT
VLG6_001302	3659.XP_004166514.1	3.09e-300	840	KOG0412@1|root,KOG0412@2759|Eukaryota,37KBZ@33090|Viridiplantae,3GB2Q@35493|Streptophyta,4JRD3@91835|fabids	35493|Streptophyta	U	Conserved oligomeric Golgi complex subunit	-	GO:0000301,GO:0003674,GO:0003676,GO:0003723,GO:0003824,GO:0004518,GO:0004519,GO:0005488,GO:0005575,GO:0005622,GO:0005623,GO:0005737,GO:0005794,GO:0006139,GO:0006725,GO:0006807,GO:0006810,GO:0006890,GO:0006891,GO:0006996,GO:0007030,GO:0008150,GO:0008152,GO:0009451,GO:0009987,GO:0010256,GO:0012505,GO:0016043,GO:0016070,GO:0016192,GO:0016787,GO:0016788,GO:0017119,GO:0022607,GO:0032991,GO:0034622,GO:…	-	ko:K20291	-	-	-	-	ko00000,ko04131	-	-	-	COG4,PPR,PPR_2,RINT1_TIP1
VLG6_000455	3983.cassava4.1_014110m	3.61e-27	107	28IRA@1|root,2QR2J@2759|Eukaryota,37MIZ@33090|Viridiplantae,3GBYS@35493|Streptophyta,4JSD9@91835|fabids	35493|Streptophyta	S	salicylic acid-binding protein 2-like	-	-	-	-	-	-	-	-	-	-	-	-	Abhydrolase_1,Abhydrolase_6
VLG6_000452	102107.XP_008241572.1	4.95e-59	194	28IRA@1|root,2QR2J@2759|Eukaryota,37MIZ@33090|Viridiplantae,3GBYS@35493|Streptophyta,4JSD9@91835|fabids	35493|Streptophyta	S	salicylic acid-binding protein 2-like	-	GO:0002376,GO:0003674,GO:0003824,GO:0006082,GO:0006725,GO:0006950,GO:0006952,GO:0006955,GO:0008150,GO:0008152,GO:0009056,GO:0009605,GO:0009607,GO:0009611,GO:0009620,GO:0009627,GO:0009696,GO:0009814,GO:0009817,GO:0009987,GO:0010817,GO:0016137,GO:0016139,GO:0016787,GO:0016788,GO:0016829,GO:0016830,GO:0016832,GO:0016999,GO:0017144,GO:0018958,GO:0019752,GO:0032787,GO:0042445,GO:0042537,GO:0043207,GO:…	4.1.2.10	ko:K20802	ko00460,ko01110,map00460,map01110	-	R01767	RC00597,RC00598	ko00000,ko00001,ko01000	-	-	-	Abhydrolase_1,Abhydrolase_6
VLG6_000459	981085.XP_010088994.1	0	892	KOG4197@1|root,KOG4197@2759|Eukaryota,37QV8@33090|Viridiplantae,3GC50@35493|Streptophyta,4JHGV@91835|fabids	35493|Streptophyta	S	Pentatricopeptide repeat-containing protein	-	GO:0003674,GO:0003676,GO:0003723,GO:0003824,GO:0004518,GO:0004519,GO:0005488,GO:0005575,GO:0005622,GO:0005623,GO:0006139,GO:0006725,GO:0006807,GO:0008150,GO:0008152,GO:0009451,GO:0009987,GO:0016070,GO:0016787,GO:0016788,GO:0034641,GO:0043170,GO:0043226,GO:0043227,GO:0043229,GO:0043231,GO:0043412,GO:0044237,GO:0044238,GO:0044424,GO:0044464,GO:0046483,GO:0071704,GO:0090304,GO:0090305,GO:0097159,GO:…	-	-	-	-	-	-	-	-	-	-	LRRNT_2,LRR_8,PPR,PPR_2
VLG6_001311	981085.XP_010100675.1	1.24e-150	434	KOG1075@1|root,KOG1075@2759|Eukaryota,37IEB@33090|Viridiplantae,3GCTU@35493|Streptophyta,4JJV0@91835|fabids	35493|Streptophyta	S	Methyltransferase domain	-	-	-	-	-	-	-	-	-	-	-	-	Methyltransf_24
VLG6_000819	3760.EMJ20657	6.6e-136	404	KOG1721@1|root,KOG1721@2759|Eukaryota,37R9R@33090|Viridiplantae,3GG1C@35493|Streptophyta,4JF25@91835|fabids	35493|Streptophyta	S	ZINC FINGER protein	-	GO:0001067,GO:0003674,GO:0003676,GO:0003677,GO:0003700,GO:0005488,GO:0005575,GO:0005622,GO:0005623,GO:0005634,GO:0006355,GO:0008150,GO:0009889,GO:0010468,GO:0010556,GO:0019219,GO:0019222,GO:0031323,GO:0031326,GO:0043226,GO:0043227,GO:0043229,GO:0043231,GO:0044212,GO:0044424,GO:0044464,GO:0050789,GO:0050794,GO:0051171,GO:0051252,GO:0060255,GO:0065007,GO:0080090,GO:0097159,GO:0140110,GO:1901363,GO:…	-	-	-	-	-	-	-	-	-	-	zf-C2H2_6
VLG6_000874	57918.XP_004308330.1	1.83e-263	741	KOG0800@1|root,KOG0800@2759|Eukaryota,388ST@33090|Viridiplantae,3GXG1@35493|Streptophyta,4JW81@91835|fabids	35493|Streptophyta	O	Putative S-adenosyl-L-methionine-dependent methyltransferase	-	-	-	-	-	-	-	-	-	-	-	-	Methyltransf_29,zf-RING_2
VLG6_000887	981085.XP_010092894.1	1.58e-90	277	28NHS@1|root,2QV3A@2759|Eukaryota,37R8W@33090|Viridiplantae,3GI06@35493|Streptophyta,4JP6G@91835|fabids	35493|Streptophyta	S	Protein kinase C conserved region 2 (CalB)	-	-	-	-	-	-	-	-	-	-	-	-	C2
VLG6_001707	981085.XP_010095331.1	3.18e-142	418	COG2124@1|root,KOG0156@2759|Eukaryota	2759|Eukaryota	Q	iron ion binding	-	GO:0001666,GO:0002213,GO:0002376,GO:0003674,GO:0003824,GO:0004497,GO:0005575,GO:0005622,GO:0005623,GO:0005737,GO:0005783,GO:0006082,GO:0006629,GO:0006720,GO:0006725,GO:0006790,GO:0006807,GO:0006950,GO:0006952,GO:0006955,GO:0008150,GO:0008152,GO:0008299,GO:0008610,GO:0009058,GO:0009605,GO:0009607,GO:0009617,GO:0009620,GO:0009628,GO:0009682,GO:0009759,GO:0009987,GO:0010035,GO:0010038,GO:0010039,GO:…	1.14.13.53,1.14.13.89,1.14.14.1,1.14.14.19,1.14.14.32	ko:K00512,ko:K00517,ko:K07408,ko:K07418,ko:K13260,ko:K20623	ko00140,ko00380,ko00590,ko00591,ko00830,ko00905,ko00943,ko00980,ko01100,ko01110,ko04212,ko04726,ko04750,ko04913,ko04917,ko04927,ko04934,ko05204,map00140,map00380,map00590,map00591,map00830,map00905,map00943,map00980,map01100,map01110,map04212,map04726,map04750,map04913,map04917,map04927,map04934,map05204	M00109,M00110	R02211,R02354,R02355,R03089,R03408,R03629,R03783,R04852,R04853,R06560,R06561,R06606,R06607,R07000,R07001,R07021,R07022,R07042,R07043,R07044,R07045,R07046,R07048,R07050,R07051,R07052,R07055,R07056,R07079,R07080,R07081,R07085,R07087,R07098,R07099,R07371,R07470,R07474,R07746,R08390,R08392,R08517,R08518,R09418,R09423,R09442	RC00046,RC00607,RC00660,RC00661,RC00704,RC00723,RC00724,RC00923,RC01184,RC01222,RC01444,RC01445,RC01710,RC01711,RC01723,RC01725,RC01727,RC01732,RC01733,RC02531	ko00000,ko00001,ko00002,ko00199,ko01000	-	-	-	p450
VLG6_001243	3750.XP_008337871.1	4.72e-114	332	2BYKQ@1|root,2QT7C@2759|Eukaryota,37JQ7@33090|Viridiplantae,3G9TG@35493|Streptophyta,4JKYT@91835|fabids	35493|Streptophyta	S	Auxin-binding protein	-	GO:0005575,GO:0005576,GO:0005618,GO:0005623,GO:0030312,GO:0044464,GO:0048046,GO:0071944	-	-	-	-	-	-	-	-	-	-	Cupin_1
VLG7_001062	981085.XP_010104048.1	2.23e-98	300	COG3491@1|root,KOG0143@2759|Eukaryota,37PC4@33090|Viridiplantae,3GH2V@35493|Streptophyta,4JDJ0@91835|fabids	35493|Streptophyta	Q	Belongs to the iron ascorbate-dependent oxidoreductase family	-	-	-	-	-	-	-	-	-	-	-	-	2OG-FeII_Oxy,DIOX_N
VLG7_001468	57918.XP_004294119.1	2.49e-202	575	28PWS@1|root,2QWJD@2759|Eukaryota,37JJK@33090|Viridiplantae,3GBI6@35493|Streptophyta,4JJKG@91835|fabids	35493|Streptophyta	S	Epidermis-specific secreted glycoprotein	-	GO:0005575,GO:0005576,GO:0005618,GO:0005622,GO:0005623,GO:0005737,GO:0005773,GO:0005774,GO:0005794,GO:0005829,GO:0006810,GO:0006833,GO:0008150,GO:0009505,GO:0012505,GO:0016020,GO:0030312,GO:0031090,GO:0042044,GO:0043226,GO:0043227,GO:0043229,GO:0043231,GO:0044422,GO:0044424,GO:0044437,GO:0044444,GO:0044446,GO:0044464,GO:0048046,GO:0051179,GO:0051234,GO:0071944,GO:0098588,GO:0098805	-	-	-	-	-	-	-	-	-	-	B_lectin,PAN_2,S_locus_glycop
VLG7_001464	3750.XP_008386258.1	8.35e-304	846	arCOG05967@1|root,2QSXK@2759|Eukaryota,37JS6@33090|Viridiplantae,3GBKD@35493|Streptophyta,4JKYC@91835|fabids	35493|Streptophyta	S	peptide-N(4)-(N-acetyl-beta- glucosaminyl)asparagine amidase	-	-	-	-	-	-	-	-	-	-	-	-	PNGaseA
VLG7_000123	981085.XP_010092517.1	8.15e-52	170	COG0361@1|root,2S8M9@2759|Eukaryota,37VXN@33090|Viridiplantae,3GKBP@35493|Streptophyta,4JQRU@91835|fabids	35493|Streptophyta	J	Translation initiation factor IF-1	-	GO:0003674,GO:0005488,GO:0005575,GO:0005622,GO:0005623,GO:0005737,GO:0005829,GO:0009507,GO:0009536,GO:0043021,GO:0043022,GO:0043226,GO:0043227,GO:0043229,GO:0043231,GO:0044424,GO:0044444,GO:0044464,GO:0044877	-	ko:K02518	-	-	-	-	ko00000,ko03012	-	-	-	eIF-1a
VLG7_000558	225117.XP_009340568.1	6.52e-11	65.1	COG5018@1|root,KOG0542@2759|Eukaryota,37S3M@33090|Viridiplantae,3GA72@35493|Streptophyta,4JKV3@91835|fabids	35493|Streptophyta	L	Exonuclease domain-containing protein	-	GO:0003674,GO:0003824,GO:0004518,GO:0004519,GO:0004521,GO:0004540,GO:0005575,GO:0005622,GO:0005623,GO:0005737,GO:0005739,GO:0006139,GO:0006725,GO:0006807,GO:0008150,GO:0008152,GO:0009892,GO:0009987,GO:0010468,GO:0010605,GO:0010608,GO:0010629,GO:0016070,GO:0016441,GO:0016458,GO:0016787,GO:0016788,GO:0016891,GO:0016893,GO:0019219,GO:0019222,GO:0031047,GO:0031323,GO:0034641,GO:0035194,GO:0040029,GO:…	-	ko:K18416,ko:K18418	-	-	-	-	ko00000,ko01000,ko03019,ko03036	-	-	-	RNase_T
VLG7_001876	981085.XP_010092514.1	4.64e-51	171	KOG0800@1|root,KOG0800@2759|Eukaryota,381H0@33090|Viridiplantae,3GM23@35493|Streptophyta,4JR40@91835|fabids	35493|Streptophyta	O	RING-H2 finger protein	-	GO:0003674,GO:0003824,GO:0004842,GO:0006464,GO:0006508,GO:0006511,GO:0006807,GO:0008150,GO:0008152,GO:0009056,GO:0009057,GO:0009987,GO:0010498,GO:0016567,GO:0016740,GO:0019538,GO:0019787,GO:0019941,GO:0030163,GO:0032446,GO:0036211,GO:0043161,GO:0043170,GO:0043412,GO:0043632,GO:0044237,GO:0044238,GO:0044248,GO:0044257,GO:0044260,GO:0044265,GO:0044267,GO:0051603,GO:0061630,GO:0061659,GO:0070647,GO:…	-	-	-	-	-	-	-	-	-	-	zf-RING_2
VLG7_001422	3750.XP_008368767.1	1.04e-65	206	2BZY5@1|root,2S3AQ@2759|Eukaryota,37VQP@33090|Viridiplantae,3GJJU@35493|Streptophyta,4JQNF@91835|fabids	35493|Streptophyta	-	-	-	-	-	-	-	-	-	-	-	-	-	-	-
VLG7_000574	225117.XP_009340199.1	4.4e-25	105	28M62@1|root,2QTNT@2759|Eukaryota,37T9J@33090|Viridiplantae,3G9GF@35493|Streptophyta,4JNUJ@91835|fabids	35493|Streptophyta	S	NUMOD3 motif (2 copies)	-	-	-	-	-	-	-	-	-	-	-	-	NUMOD3
VLG7_000505	3649.evm.model.supercontig_23.151	2.89e-74	228	KOG1789@1|root,KOG1789@2759|Eukaryota,37IXJ@33090|Viridiplantae,3GGCC@35493|Streptophyta,3HQCC@3699|Brassicales	35493|Streptophyta	OU	Domain of unknown function (DUF4339)	-	-	-	ko:K09533	-	-	-	-	ko00000,ko03041,ko03110	-	-	-	DUF4339,DnaJ
VLG7_001358	85681.XP_006443423.1	1.09e-16	78.6	2CJ2B@1|root,2S81K@2759|Eukaryota,37WVC@33090|Viridiplantae,3GM6N@35493|Streptophyta	35493|Streptophyta	-	-	-	-	-	-	-	-	-	-	-	-	-	-	-
VLG7_000478	3641.EOY30819	1.54e-78	243	2B917@1|root,2S0SZ@2759|Eukaryota,37UZ1@33090|Viridiplantae,3GIDV@35493|Streptophyta	35493|Streptophyta	S	Late embryogenesis abundant (LEA) hydroxyproline-rich glycoprotein family	-	-	-	-	-	-	-	-	-	-	-	-	LEA_2
VLG7_001769	102107.XP_008241157.1	6.34e-35	130	COG2940@1|root,KOG2084@2759|Eukaryota,37T8M@33090|Viridiplantae,3GFPJ@35493|Streptophyta,4JDXV@91835|fabids	35493|Streptophyta	B	Histone-lysine N-methyltransferase	-	-	-	ko:K11426	-	-	-	-	ko00000,ko03036	-	-	-	SET
VLG7_000426	981085.XP_010104806.1	1.79e-23	96.3	COG1028@1|root,KOG0725@2759|Eukaryota,37N5K@33090|Viridiplantae,3GBI9@35493|Streptophyta	35493|Streptophyta	Q	Secoisolariciresinol dehydrogenase-like	-	-	-	-	-	-	-	-	-	-	-	-	adh_short_C2
VLG7_001724	3983.cassava4.1_028705m	1.74e-61	193	2BXPJ@1|root,2S10P@2759|Eukaryota,37VQG@33090|Viridiplantae,3GJVE@35493|Streptophyta,4JQ19@91835|fabids	35493|Streptophyta	S	Indole-3-acetic acid-induced protein	-	-	-	ko:K14488	ko04075,map04075	-	-	-	ko00000,ko00001	-	-	-	Auxin_inducible
VLG7_001717	85681.XP_006446237.1	1.57e-29	113	2E61T@1|root,2SCTE@2759|Eukaryota,380VU@33090|Viridiplantae,3GM0B@35493|Streptophyta	35493|Streptophyta	S	Encoded by	-	-	-	-	-	-	-	-	-	-	-	-	ubiquitin
VLG7_000897	3988.XP_002525441.1	1.21e-104	313	COG1028@1|root,KOG0725@2759|Eukaryota,37I6K@33090|Viridiplantae,3GCDJ@35493|Streptophyta,4JM35@91835|fabids	35493|Streptophyta	Q	Short-chain type dehydrogenase	-	-	1.1.1.100	ko:K00059	ko00061,ko00333,ko00780,ko01040,ko01100,ko01130,ko01212,map00061,map00333,map00780,map01040,map01100,map01130,map01212	M00083,M00572	R04533,R04534,R04536,R04543,R04566,R04953,R04964,R07759,R07763,R10116,R10120,R11671	RC00029,RC00117	ko00000,ko00001,ko00002,ko01000,ko01004	-	-	-	adh_short_C2
VLG7_000403	3641.EOY08292	1.36e-66	206	2BXPJ@1|root,2S23E@2759|Eukaryota,37VPB@33090|Viridiplantae,3GJTG@35493|Streptophyta	35493|Streptophyta	S	auxin-induced protein	-	-	-	ko:K14488	ko04075,map04075	-	-	-	ko00000,ko00001	-	-	-	Auxin_inducible
VLG7_000853	981085.XP_010097089.1	3.91e-37	134	28HN2@1|root,2QPZP@2759|Eukaryota,3893S@33090|Viridiplantae,3GXZG@35493|Streptophyta	35493|Streptophyta	S	signal transduction involved in G2 DNA damage checkpoint	-	-	-	ko:K20776	ko03440,map03440	-	-	-	ko00000,ko00001,ko03036,ko03400,ko04121	-	-	-	-
VLG7_000852	3750.XP_008382746.1	8.06e-66	207	2D2RM@1|root,2SNRQ@2759|Eukaryota,37ZQR@33090|Viridiplantae,3GPHA@35493|Streptophyta,4JTUE@91835|fabids	35493|Streptophyta	S	TMV resistance protein	-	-	-	-	-	-	-	-	-	-	-	-	TIR
VLG7_000806	3760.EMJ19588	1.21e-50	168	29YKF@1|root,2RXU7@2759|Eukaryota,37U31@33090|Viridiplantae,3GIB0@35493|Streptophyta,4JNWE@91835|fabids	35493|Streptophyta	-	-	-	-	-	-	-	-	-	-	-	-	-	-	Mesd
VLG7_000387	102107.XP_008241243.1	3.27e-28	109	28N60@1|root,2QUR9@2759|Eukaryota,37S47@33090|Viridiplantae,3GH60@35493|Streptophyta,4JIVS@91835|fabids	35493|Streptophyta	S	YLS9-like	-	-	-	-	-	-	-	-	-	-	-	-	LEA_2
VLG7_000385	102107.XP_008241417.1	2.07e-18	83.6	28N60@1|root,2QUR9@2759|Eukaryota,37S47@33090|Viridiplantae,3GH60@35493|Streptophyta,4JIVS@91835|fabids	35493|Streptophyta	S	YLS9-like	-	-	-	-	-	-	-	-	-	-	-	-	LEA_2
VLG7_000384	3760.EMJ04153	4.64e-42	145	28N60@1|root,2QUR9@2759|Eukaryota,37S47@33090|Viridiplantae,3GH60@35493|Streptophyta,4JIVS@91835|fabids	35493|Streptophyta	S	YLS9-like	-	-	-	-	-	-	-	-	-	-	-	-	LEA_2
VLG7_000351	3988.XP_002528647.1	7.19e-78	250	COG2124@1|root,KOG0156@2759|Eukaryota,37TAF@33090|Viridiplantae,3GGPA@35493|Streptophyta,4JVGQ@91835|fabids	35493|Streptophyta	Q	Belongs to the cytochrome P450 family	-	-	-	ko:K20618	-	-	-	-	ko00000,ko00199	-	-	-	p450
VLG7_000348	3983.cassava4.1_024167m	2.35e-94	293	COG2124@1|root,KOG0156@2759|Eukaryota,37TAF@33090|Viridiplantae,3GGPA@35493|Streptophyta,4JVGQ@91835|fabids	35493|Streptophyta	Q	Belongs to the cytochrome P450 family	-	-	-	ko:K20618	-	-	-	-	ko00000,ko00199	-	-	-	p450
VLG7_000312	2711.XP_006493540.1	1.45e-71	234	KOG1721@1|root,KOG1721@2759|Eukaryota,37JGV@33090|Viridiplantae,3GFBT@35493|Streptophyta	35493|Streptophyta	S	ZINC FINGER protein	-	GO:0003674,GO:0003676,GO:0003677,GO:0003700,GO:0005488,GO:0005575,GO:0005622,GO:0005623,GO:0005634,GO:0006355,GO:0008150,GO:0009889,GO:0010468,GO:0010556,GO:0019219,GO:0019222,GO:0031323,GO:0031326,GO:0043226,GO:0043227,GO:0043229,GO:0043231,GO:0043565,GO:0044424,GO:0044464,GO:0050789,GO:0050794,GO:0051171,GO:0051252,GO:0060255,GO:0065007,GO:0080090,GO:0097159,GO:0140110,GO:1901363,GO:1903506,GO:…	-	-	-	-	-	-	-	-	-	-	zf-C2H2_6
VLG7_000730	3983.cassava4.1_014442m	2.27e-37	137	2C7MT@1|root,2QS0C@2759|Eukaryota,37NF9@33090|Viridiplantae,3GBAJ@35493|Streptophyta,4JE60@91835|fabids	35493|Streptophyta	S	acid phosphatase	-	-	-	-	-	-	-	-	-	-	-	-	Acid_phosphat_B
VLG7_001182	3649.evm.model.supercontig_77.108	1.41e-40	140	KOG0406@1|root,KOG0406@2759|Eukaryota,37HQ3@33090|Viridiplantae,3G7AJ@35493|Streptophyta,3HQAV@3699|Brassicales	35493|Streptophyta	O	Glutathione S-transferase	GSTU1	GO:0001101,GO:0003674,GO:0003824,GO:0004364,GO:0005488,GO:0005515,GO:0005575,GO:0005576,GO:0005622,GO:0005623,GO:0005634,GO:0005737,GO:0005773,GO:0005774,GO:0005829,GO:0005886,GO:0006518,GO:0006575,GO:0006725,GO:0006749,GO:0006790,GO:0006807,GO:0006950,GO:0006979,GO:0007154,GO:0008150,GO:0008152,GO:0009056,GO:0009266,GO:0009404,GO:0009407,GO:0009409,GO:0009414,GO:0009415,GO:0009507,GO:0009532,GO:…	2.5.1.18	ko:K00799	ko00480,ko00980,ko00982,ko00983,ko01524,ko05200,ko05204,ko05225,ko05418,map00480,map00980,map00982,map00983,map01524,map05200,map05204,map05225,map05418	-	R03522,R07002,R07003,R07004,R07023,R07024,R07025,R07026,R07069,R07070,R07083,R07084,R07091,R07092,R07093,R07094,R07100,R07113,R07116,R08280,R09409,R11905	RC00004,RC00069,RC00840,RC00948,RC01704,RC01705,RC01706,RC01758,RC01759,RC01765,RC01767,RC01769,RC02243,RC02527,RC02939,RC02940,RC02942,RC02943,RC02944	ko00000,ko00001,ko01000,ko02000	1.A.12.2.2,1.A.12.3.2	-	-	GST_C,GST_C_2,GST_N,GST_N_3
VLG7_000279	2711.XP_006481488.1	2.23e-17	78.6	2CZXK@1|root,2SC18@2759|Eukaryota,37XFW@33090|Viridiplantae,3GKZQ@35493|Streptophyta	35493|Streptophyta	-	-	-	-	-	-	-	-	-	-	-	-	-	-	-
VLG7_000236	981085.XP_010110442.1	3.03e-254	712	KOG2130@1|root,KOG2130@2759|Eukaryota,37N5H@33090|Viridiplantae,3GGIP@35493|Streptophyta,4JFKB@91835|fabids	35493|Streptophyta	BT	f-box protein	-	GO:0000976,GO:0000987,GO:0001067,GO:0003674,GO:0003676,GO:0003677,GO:0003690,GO:0005488,GO:0005575,GO:0005622,GO:0005623,GO:0005634,GO:0006325,GO:0006464,GO:0006479,GO:0006807,GO:0006996,GO:0008150,GO:0008152,GO:0008213,GO:0009987,GO:0010029,GO:0010030,GO:0016043,GO:0016569,GO:0016570,GO:0016571,GO:0018193,GO:0018195,GO:0018216,GO:0019538,GO:0032259,GO:0034969,GO:0036211,GO:0043170,GO:0043226,GO:…	-	-	-	-	-	-	-	-	-	-	Cupin_8,F-box,F-box-like
VLG7_000212	57918.XP_004303348.1	6.97e-19	87	COG2094@1|root,KOG4486@2759|Eukaryota,37MWH@33090|Viridiplantae,3GFDM@35493|Streptophyta,4JJDD@91835|fabids	35493|Streptophyta	L	DNA-3-methyladenine	-	GO:0003674,GO:0003824,GO:0003905,GO:0006139,GO:0006259,GO:0006281,GO:0006284,GO:0006725,GO:0006807,GO:0006950,GO:0006974,GO:0008150,GO:0008152,GO:0009987,GO:0016787,GO:0016798,GO:0016799,GO:0019104,GO:0033554,GO:0034641,GO:0043170,GO:0044237,GO:0044238,GO:0044260,GO:0046483,GO:0050896,GO:0051716,GO:0071704,GO:0090304,GO:0140097,GO:1901360	3.2.2.21	ko:K03652	ko03410,map03410	-	-	-	ko00000,ko00001,ko01000,ko03400	-	-	-	Pur_DNA_glyco
VLG7_000680	102107.XP_008240464.1	5.7e-235	683	KOG2171@1|root,KOG2171@2759|Eukaryota,37KUA@33090|Viridiplantae,3GCVT@35493|Streptophyta,4JTPA@91835|fabids	35493|Streptophyta	UY	Importin-5-like	IPO5	-	-	ko:K20222	-	-	-	-	ko00000,ko03009	1.I.1	-	-	HEAT,HEAT_2,HEAT_EZ,IBN_N
VLG7_000639	981085.XP_010098222.1	9.94e-59	191	28Q3W@1|root,2S0HP@2759|Eukaryota,37UY0@33090|Viridiplantae,3GIKQ@35493|Streptophyta,4JQ2D@91835|fabids	35493|Streptophyta	S	alpha-amylase subtilisin	-	GO:0003674,GO:0004857,GO:0004866,GO:0004867,GO:0008150,GO:0009892,GO:0010466,GO:0010605,GO:0010951,GO:0015066,GO:0019222,GO:0030162,GO:0030234,GO:0030414,GO:0031323,GO:0031324,GO:0032268,GO:0032269,GO:0043086,GO:0044092,GO:0045861,GO:0048519,GO:0048523,GO:0050789,GO:0050790,GO:0050794,GO:0051171,GO:0051172,GO:0051246,GO:0051248,GO:0051336,GO:0051346,GO:0052547,GO:0052548,GO:0060255,GO:0061134,GO:…	-	-	-	-	-	-	-	-	-	-	Kunitz_legume
VLG7_001973	981085.XP_010104208.1	1.94e-21	97.8	2CN7D@1|root,2QUBQ@2759|Eukaryota,37SPM@33090|Viridiplantae,3G8HC@35493|Streptophyta,4JFNM@91835|fabids	35493|Streptophyta	-	-	-	-	-	-	-	-	-	-	-	-	-	-	HhH-GPD
VLG7_000616	3760.EMJ12837	5.79e-30	119	COG1836@1|root,2QU2J@2759|Eukaryota,37MEJ@33090|Viridiplantae,3GBQ6@35493|Streptophyta,4JIRP@91835|fabids	35493|Streptophyta	S	Integral membrane protein DUF92	-	GO:0005575,GO:0016020	-	-	-	-	-	-	-	-	-	-	DUF92
VLG8_001557	102107.XP_008239677.1	6.03e-117	340	2BYKQ@1|root,2QSRM@2759|Eukaryota,37SNB@33090|Viridiplantae,3G91A@35493|Streptophyta,4JHNY@91835|fabids	35493|Streptophyta	S	Germin-like protein subfamily T member	-	GO:0005575,GO:0005618,GO:0005623,GO:0030312,GO:0044464,GO:0071944	-	-	-	-	-	-	-	-	-	-	Cupin_1
VLG8_001576	981085.XP_010111543.1	4.01e-294	824	KOG4197@1|root,KOG4197@2759|Eukaryota,37T9H@33090|Viridiplantae,3GFS5@35493|Streptophyta	35493|Streptophyta	S	Pentatricopeptide repeat-containing protein	-	-	-	-	-	-	-	-	-	-	-	-	DYW_deaminase,PPR
VLG8_001565	3760.EMJ11106	9.04e-176	511	COG0465@1|root,KOG0743@2759|Eukaryota,37QYB@33090|Viridiplantae,3G9CY@35493|Streptophyta,4JIVQ@91835|fabids	35493|Streptophyta	O	Belongs to the AAA ATPase family	-	GO:0003674,GO:0005215,GO:0005575,GO:0005622,GO:0005623,GO:0005737,GO:0005739,GO:0006810,GO:0008104,GO:0008150,GO:0008320,GO:0008565,GO:0009987,GO:0015031,GO:0015833,GO:0016043,GO:0022607,GO:0022857,GO:0022884,GO:0033036,GO:0034622,GO:0042886,GO:0042887,GO:0043226,GO:0043227,GO:0043229,GO:0043231,GO:0043933,GO:0044085,GO:0044424,GO:0044444,GO:0044464,GO:0045184,GO:0051131,GO:0051179,GO:0051234,GO:…	-	ko:K08900	-	-	-	-	ko00000,ko03029	-	-	-	AAA,AAA_assoc
VLG8_001118	225117.XP_009334824.1	2.5e-70	227	COG2124@1|root,KOG0157@2759|Eukaryota,37IBB@33090|Viridiplantae,3G825@35493|Streptophyta,4JGM6@91835|fabids	35493|Streptophyta	Q	Cytochrome p450	-	-	-	ko:K07437	ko00830,ko01100,map00830,map01100	-	R08390,R08392	RC00723,RC00724	ko00000,ko00001,ko00199	-	-	-	p450
VLG8_001103	3847.GLYMA19G18682.1	2.14e-15	74.7	2D511@1|root,2SWYQ@2759|Eukaryota,37XZU@33090|Viridiplantae,3GMVS@35493|Streptophyta	35493|Streptophyta	S	Prolamin-like	-	-	-	-	-	-	-	-	-	-	-	-	Prolamin_like
VLG8_001126	29760.VIT_17s0119g00120.t01	3.35e-88	266	28Q3W@1|root,2QWSQ@2759|Eukaryota,37SSJ@33090|Viridiplantae,3GAHD@35493|Streptophyta	35493|Streptophyta	S	Encoded by	-	GO:0005575,GO:0005576,GO:0005618,GO:0005623,GO:0030312,GO:0044464,GO:0048046,GO:0071944	-	-	-	-	-	-	-	-	-	-	Kunitz_legume
VLG8_002051	4098.XP_009624668.1	1.09e-19	87.4	COG2072@1|root,KOG1399@2759|Eukaryota,37NK0@33090|Viridiplantae,3G85W@35493|Streptophyta,44SPB@71274|asterids	35493|Streptophyta	Q	flavin-containing monooxygenase	-	GO:0001666,GO:0002218,GO:0002253,GO:0002376,GO:0002682,GO:0002684,GO:0003674,GO:0003824,GO:0004497,GO:0006950,GO:0006952,GO:0006955,GO:0007154,GO:0007165,GO:0008150,GO:0008152,GO:0008219,GO:0009605,GO:0009607,GO:0009617,GO:0009620,GO:0009626,GO:0009627,GO:0009628,GO:0009814,GO:0009870,GO:0009987,GO:0010204,GO:0012501,GO:0016491,GO:0023052,GO:0031347,GO:0031349,GO:0033554,GO:0034050,GO:0036293,GO:…	1.14.13.8	ko:K00485	ko00982,ko01120,map00982,map01120	-	R08266	RC02233	ko00000,ko00001,ko01000	-	-	-	FMO-like,K_oxygenase
VLG8_000735	3750.XP_008374515.1	5.54e-134	386	COG1028@1|root,KOG0725@2759|Eukaryota,37S51@33090|Viridiplantae,3GBU0@35493|Streptophyta,4JKG4@91835|fabids	35493|Streptophyta	Q	Dehydrogenase	-	-	-	-	-	-	-	-	-	-	-	-	adh_short_C2
VLG8_001891	3760.EMJ12264	8.8e-14	72	2BCY1@1|root,2S114@2759|Eukaryota,37UWQ@33090|Viridiplantae,3GIMX@35493|Streptophyta,4JPZQ@91835|fabids	35493|Streptophyta	S	Early nodulin-like protein	-	-	-	-	-	-	-	-	-	-	-	-	Cu_bind_like
VLG8_001422	3760.EMJ19770	8.44e-43	144	2E076@1|root,2S7NN@2759|Eukaryota,37X5D@33090|Viridiplantae,3GKYD@35493|Streptophyta,4JR55@91835|fabids	35493|Streptophyta	-	-	-	-	-	-	-	-	-	-	-	-	-	-	-
VLG8_000574	981085.XP_010093047.1	2.68e-39	145	2CN7B@1|root,2QUBG@2759|Eukaryota,388P9@33090|Viridiplantae,3GXJ7@35493|Streptophyta,4JW4C@91835|fabids	35493|Streptophyta	-	-	-	-	-	-	-	-	-	-	-	-	-	-	-
VLG8_001424	3983.cassava4.1_026117m	1.75e-14	78.6	COG2940@1|root,KOG4443@2759|Eukaryota,37RR3@33090|Viridiplantae,3G8QN@35493|Streptophyta,4JHIE@91835|fabids	35493|Streptophyta	O	PHD finger family protein	-	-	-	-	-	-	-	-	-	-	-	-	PHD
VLG8_001454	3760.EMJ12006	2.57e-96	306	COG5641@1|root,KOG1601@2759|Eukaryota,37RDZ@33090|Viridiplantae,3G9MY@35493|Streptophyta,4JTN5@91835|fabids	35493|Streptophyta	K	Zinc finger protein CONSTANS-like	-	GO:0001763,GO:0003674,GO:0003700,GO:0005575,GO:0005622,GO:0005623,GO:0005634,GO:0005730,GO:0006355,GO:0007275,GO:0008150,GO:0009314,GO:0009416,GO:0009628,GO:0009639,GO:0009641,GO:0009653,GO:0009889,GO:0009891,GO:0009893,GO:0010016,GO:0010223,GO:0010346,GO:0010468,GO:0010556,GO:0010557,GO:0010604,GO:0010628,GO:0016020,GO:0019219,GO:0019222,GO:0031323,GO:0031325,GO:0031326,GO:0031328,GO:0031974,GO:…	-	-	-	-	-	-	-	-	-	-	CCT,zf-B_box
VLG8_001474	102107.XP_008240315.1	4.42e-66	227	COG0515@1|root,KOG1187@2759|Eukaryota,37MEY@33090|Viridiplantae,3G7FA@35493|Streptophyta,4JJGR@91835|fabids	35493|Streptophyta	T	Wall-associated receptor kinase C-terminal	-	-	-	-	-	-	-	-	-	-	-	-	GUB_WAK_bind,Pkinase,Pkinase_Tyr,WAK_assoc
VLG8_001018	981085.XP_010106652.1	5.12e-36	125	KOG3801@1|root,KOG3801@2759|Eukaryota,37W1Q@33090|Viridiplantae,3GK4T@35493|Streptophyta,4JUZN@91835|fabids	35493|Streptophyta	A	Belongs to the complex I LYR family	-	-	-	ko:K22069	-	-	-	-	ko00000,ko03029	-	-	-	Complex1_LYR
VLG8_001047	102107.XP_008239923.1	1.15e-249	699	KOG4197@1|root,KOG4197@2759|Eukaryota,37NXN@33090|Viridiplantae,3GAWV@35493|Streptophyta,4JMV9@91835|fabids	35493|Streptophyta	S	Pentatricopeptide repeat-containing protein	-	-	-	-	-	-	-	-	-	-	-	-	PPR,PPR_2
VLG8_001324	2711.XP_006494411.1	1.69e-46	156	2CM9J@1|root,2QPPQ@2759|Eukaryota,37T7F@33090|Viridiplantae,3GGJ2@35493|Streptophyta	35493|Streptophyta	L	exonuclease	-	GO:0003674,GO:0003824,GO:0004518,GO:0004527,GO:0005575,GO:0005618,GO:0005622,GO:0005623,GO:0005737,GO:0005829,GO:0005886,GO:0006139,GO:0006725,GO:0006807,GO:0006950,GO:0006974,GO:0008150,GO:0008152,GO:0008408,GO:0009380,GO:0009987,GO:0016020,GO:0016787,GO:0016788,GO:0030312,GO:0032991,GO:0033554,GO:0034641,GO:0043170,GO:0044237,GO:0044238,GO:0044424,GO:0044444,GO:0044464,GO:0046483,GO:0050896,GO:…	-	-	-	-	-	-	-	-	-	-	RNase_T
VLG8_002204	3983.cassava4.1_034313m	1.44e-10	63.2	2BD6H@1|root,2RZQI@2759|Eukaryota,37UX3@33090|Viridiplantae,3GIM3@35493|Streptophyta,4JPY7@91835|fabids	35493|Streptophyta	S	Early nodulin-like protein	-	-	-	-	-	-	-	-	-	-	-	-	Cu_bind_like
VLG8_000495	225117.XP_009347785.1	5.28e-226	689	KOG4658@1|root,KOG4658@2759|Eukaryota,37P43@33090|Viridiplantae,3GF32@35493|Streptophyta,4JS8T@91835|fabids	35493|Streptophyta	T	Belongs to the disease resistance NB-LRR family	-	-	-	-	-	-	-	-	-	-	-	-	NB-ARC
VLG8_000498	3694.POPTR_0001s05800.1	3.33e-22	91.3	COG0474@1|root,KOG0204@2759|Eukaryota	2759|Eukaryota	P	calcium-transporting ATPase activity	-	-	3.6.3.8	ko:K01537	-	-	-	-	ko00000,ko01000	3.A.3.2	-	-	ATP_Ca_trans_C,CaATP_NAI,Cation_ATPase,Cation_ATPase_C,Cation_ATPase_N,E1-E2_ATPase,Hydrolase,Hydrolase_3
VLG8_002229	102107.XP_008226837.1	1.23e-113	346	KOG1339@1|root,KOG1339@2759|Eukaryota,37NWF@33090|Viridiplantae,3GHGA@35493|Streptophyta,4JSW3@91835|fabids	35493|Streptophyta	O	Belongs to the peptidase A1 family	-	-	-	-	-	-	-	-	-	-	-	-	TAXi_C,TAXi_N
VLG8_001397	4432.XP_010260988.1	2.85e-35	129	29XXM@1|root,2RXVE@2759|Eukaryota,37U5K@33090|Viridiplantae,3GHXH@35493|Streptophyta	35493|Streptophyta	S	Dirigent proteins impart stereoselectivity on the phenoxy radical-coupling reaction, yielding optically active lignans from two molecules of coniferyl alcohol in the biosynthesis of lignans, flavonolignans, and alkaloids and thus plays a central role in plant secondary metabolism	-	-	-	-	-	-	-	-	-	-	-	-	Dirigent
VLG8_001394	85681.XP_006440811.1	4.96e-137	402	KOG1584@1|root,KOG1584@2759|Eukaryota,37P2M@33090|Viridiplantae,3G7Q8@35493|Streptophyta	35493|Streptophyta	H	Belongs to the sulfotransferase 1 family	-	-	2.8.2.39	ko:K22312	-	-	-	-	ko00000,ko01000	-	-	-	Sulfotransfer_1
VLG8_000923	3649.evm.model.supercontig_4.156	5.77e-13	68.6	2CPEU@1|root,2R1HH@2759|Eukaryota,3837P@33090|Viridiplantae,3GWRB@35493|Streptophyta,3I1E6@3699|Brassicales	35493|Streptophyta	S	Prolamin-like	-	GO:0005575,GO:0005618,GO:0005623,GO:0030312,GO:0043680,GO:0044426,GO:0044462,GO:0044464,GO:0071944	-	-	-	-	-	-	-	-	-	-	Prolamin_like
VLG8_000926	3885.XP_007161470.1	2.87e-10	62	2D511@1|root,2SWYQ@2759|Eukaryota,37XZU@33090|Viridiplantae,3GZ72@35493|Streptophyta,4JV6Q@91835|fabids	35493|Streptophyta	S	Prolamin-like	-	-	-	-	-	-	-	-	-	-	-	-	Prolamin_like
VLG8_000915	3750.XP_008393272.1	7.36e-65	215	COG0148@1|root,KOG2670@2759|Eukaryota,37HWM@33090|Viridiplantae,3GB5V@35493|Streptophyta,4JJAG@91835|fabids	35493|Streptophyta	G	Enolase 1	-	GO:0000902,GO:0000904,GO:0003674,GO:0003824,GO:0004634,GO:0005575,GO:0005622,GO:0005623,GO:0005737,GO:0008150,GO:0009507,GO:0009532,GO:0009536,GO:0009570,GO:0009653,GO:0009719,GO:0009725,GO:0009735,GO:0009888,GO:0009987,GO:0010026,GO:0010033,GO:0010090,GO:0016043,GO:0016829,GO:0016835,GO:0016836,GO:0030154,GO:0032502,GO:0032989,GO:0042221,GO:0043226,GO:0043227,GO:0043229,GO:0043231,GO:0044422,GO:…	4.2.1.11	ko:K01689	ko00010,ko00680,ko01100,ko01110,ko01120,ko01130,ko01200,ko01230,ko03018,ko04066,map00010,map00680,map01100,map01110,map01120,map01130,map01200,map01230,map03018,map04066	M00001,M00002,M00003,M00346,M00394	R00658	RC00349	ko00000,ko00001,ko00002,ko01000,ko03019,ko04147	-	-	-	Enolase_C,Enolase_N
VLG8_000942	2711.XP_006485721.1	3.35e-189	543	KOG1192@1|root,KOG1192@2759|Eukaryota,37M54@33090|Viridiplantae,3G8WK@35493|Streptophyta	35493|Streptophyta	CG	UDP-Glycosyltransferase	-	-	-	-	-	-	-	-	-	-	-	-	UDPGT
VLG8_000970	981085.XP_010101648.1	2.06e-25	103	COG1446@1|root,KOG1592@2759|Eukaryota,37RT8@33090|Viridiplantae,3GAV1@35493|Streptophyta,4JEP1@91835|fabids	35493|Streptophyta	E	Isoaspartyl peptidase	-	GO:0001101,GO:0002376,GO:0003674,GO:0003824,GO:0004067,GO:0004175,GO:0004190,GO:0005575,GO:0005622,GO:0005623,GO:0005737,GO:0005783,GO:0005829,GO:0006508,GO:0006807,GO:0006950,GO:0006952,GO:0006955,GO:0008150,GO:0008152,GO:0008233,GO:0009056,GO:0009057,GO:0009414,GO:0009415,GO:0009605,GO:0009607,GO:0009627,GO:0009628,GO:0009719,GO:0009725,GO:0009737,GO:0009814,GO:0010033,GO:0010035,GO:0012505,GO:…	3.4.19.5	ko:K13051	-	-	-	-	ko00000,ko01000,ko01002	-	-	-	Asparaginase_2
VLG8_001864	225117.XP_009367234.1	0	1025	KOG4658@1|root,KOG4658@2759|Eukaryota,37P43@33090|Viridiplantae,3GF32@35493|Streptophyta,4JMAN@91835|fabids	35493|Streptophyta	T	disease resistance	-	-	-	-	-	-	-	-	-	-	-	-	NB-ARC
VLG8_001232	29760.VIT_05s0077g01600.t01	8.76e-14	71.2	29YBJ@1|root,2RXTQ@2759|Eukaryota,37U6W@33090|Viridiplantae,3GJNW@35493|Streptophyta	35493|Streptophyta	S	Major allergen Pru	-	-	-	-	-	-	-	-	-	-	-	-	Bet_v_1
VLG8_001236	3750.XP_008339655.1	1.99e-42	153	COG1482@1|root,KOG2757@2759|Eukaryota,37YJX@33090|Viridiplantae,3GE4P@35493|Streptophyta,4JT9C@91835|fabids	35493|Streptophyta	G	Mannose-6-phosphate isomerase 1-like	-	-	5.3.1.8	ko:K01809	ko00051,ko00520,ko01100,ko01110,ko01130,map00051,map00520,map01100,map01110,map01130	M00114	R01819	RC00376	ko00000,ko00001,ko00002,ko01000	-	-	-	PMI_typeI
VLG8_001717	3760.EMJ10548	3.13e-192	540	2CMFR@1|root,2QQ8A@2759|Eukaryota,37Q7H@33090|Viridiplantae,3GDHF@35493|Streptophyta,4JNFH@91835|fabids	35493|Streptophyta	C	The light-harvesting complex (LHC) functions as a light receptor, it captures and delivers excitation energy to photosystems with which it is closely associated	-	GO:0003674,GO:0005488,GO:0005575,GO:0005622,GO:0005623,GO:0005737,GO:0006091,GO:0008150,GO:0008152,GO:0009314,GO:0009416,GO:0009507,GO:0009526,GO:0009532,GO:0009534,GO:0009535,GO:0009536,GO:0009570,GO:0009579,GO:0009628,GO:0009637,GO:0009639,GO:0009765,GO:0009768,GO:0009941,GO:0009987,GO:0010218,GO:0010287,GO:0015979,GO:0016020,GO:0016168,GO:0019684,GO:0031409,GO:0031967,GO:0031975,GO:0031976,GO:…	-	ko:K14172	ko00196,map00196	-	-	-	ko00000,ko00001,ko00194	-	-	-	Chloroa_b-bind
VLG8_001708	3988.XP_002511187.1	9.97e-36	130	COG1718@1|root,KOG2270@2759|Eukaryota,37NKT@33090|Viridiplantae,3G7AN@35493|Streptophyta,4JGG8@91835|fabids	35493|Streptophyta	DT	Serine threonine-protein kinase	-	GO:0005575,GO:0005622,GO:0005623,GO:0005634,GO:0005654,GO:0005737,GO:0005829,GO:0006139,GO:0006364,GO:0006396,GO:0006725,GO:0006807,GO:0008150,GO:0008152,GO:0009893,GO:0009987,GO:0010467,GO:0010468,GO:0010604,GO:0010628,GO:0016070,GO:0016072,GO:0019219,GO:0019222,GO:0022613,GO:0030490,GO:0030684,GO:0030688,GO:0031323,GO:0031325,GO:0031974,GO:0031981,GO:0032991,GO:0034470,GO:0034641,GO:0034660,GO:…	2.7.11.1	ko:K07178	ko03008,map03008	-	-	-	ko00000,ko00001,ko01000,ko01001,ko03009	-	-	-	RIO1
VLG8_001753	3760.EMJ10867	8.84e-30	110	2DPAC@1|root,2S695@2759|Eukaryota,37WAP@33090|Viridiplantae,3GJSW@35493|Streptophyta,4JQAW@91835|fabids	35493|Streptophyta	S	Belongs to the Casparian strip membrane proteins (CASP) family	-	GO:0003674,GO:0005488,GO:0048037,GO:0051536,GO:0051540	-	-	-	-	-	-	-	-	-	-	DUF588
VLG8_001744	3649.evm.model.supercontig_4.137	2.33e-08	62	2E06Y@1|root,2S7ND@2759|Eukaryota,37X0Z@33090|Viridiplantae,3GM5K@35493|Streptophyta,3I09K@3699|Brassicales	35493|Streptophyta	-	-	-	-	-	-	-	-	-	-	-	-	-	-	-
VLG8_000413	981085.XP_010103164.1	1.06e-73	237	COG2303@1|root,KOG1238@2759|Eukaryota,37YUX@33090|Viridiplantae,3GNHX@35493|Streptophyta,4JT9N@91835|fabids	35493|Streptophyta	E	(R)-mandelonitrile lyase	-	GO:0005575,GO:0005622,GO:0005623,GO:0005737,GO:0031410,GO:0031982,GO:0033095,GO:0043226,GO:0043227,GO:0043229,GO:0044424,GO:0044444,GO:0044464,GO:0097708	4.1.2.10	ko:K08248	ko00460,ko01110,map00460,map01110	-	R01409,R01767,R02811	RC00597,RC00598,RC00784,RC02852	ko00000,ko00001,ko01000	-	-	-	GMC_oxred_C,GMC_oxred_N
VLG8_000410	3659.XP_004167384.1	6.5e-16	81.6	COG2303@1|root,KOG1238@2759|Eukaryota,37YUX@33090|Viridiplantae,3GNHX@35493|Streptophyta,4JT9N@91835|fabids	35493|Streptophyta	E	(R)-mandelonitrile lyase	-	GO:0005575,GO:0005622,GO:0005623,GO:0005737,GO:0031410,GO:0031982,GO:0033095,GO:0043226,GO:0043227,GO:0043229,GO:0044424,GO:0044444,GO:0044464,GO:0097708	4.1.2.10	ko:K08248	ko00460,ko01110,map00460,map01110	-	R01409,R01767,R02811	RC00597,RC00598,RC00784,RC02852	ko00000,ko00001,ko01000	-	-	-	GMC_oxred_C,GMC_oxred_N
VLG9_000731	225117.XP_009339854.1	3.88e-16	83.2	2D51P@1|root,2SX1C@2759|Eukaryota,3827W@33090|Viridiplantae,3GMWG@35493|Streptophyta,4JVC7@91835|fabids	35493|Streptophyta	-	-	-	-	-	-	-	-	-	-	-	-	-	-	-
VLG9_000717	981085.XP_010090853.1	3.2e-23	100	2D1CI@1|root,2SHKT@2759|Eukaryota,37Y6Z@33090|Viridiplantae	33090|Viridiplantae	S	C1 domain	-	-	-	-	-	-	-	-	-	-	-	-	C1_2
VLG9_000328	2711.XP_006487873.1	4.72e-09	61.6	2CV4P@1|root,2RRA4@2759|Eukaryota,388HS@33090|Viridiplantae,3GQPH@35493|Streptophyta	2711.XP_006487873.1|-	-	-	-	-	-	-	-	-	-	-	-	-	-	-	-
VLG9_000358	2711.XP_006491782.1	2.07e-11	67	28IYG@1|root,2QRA4@2759|Eukaryota,37KU6@33090|Viridiplantae,3GFCK@35493|Streptophyta	35493|Streptophyta	S	F-Box protein	-	GO:0000003,GO:0003006,GO:0003674,GO:0005488,GO:0007275,GO:0008150,GO:0009790,GO:0009791,GO:0009793,GO:0010154,GO:0022414,GO:0030246,GO:0032501,GO:0032502,GO:0048316,GO:0048608,GO:0048731,GO:0048856,GO:0061458	-	-	-	-	-	-	-	-	-	-	F-box,PP2
VLG9_001200	981085.XP_010107717.1	3.03e-31	119	KOG1692@1|root,KOG1692@2759|Eukaryota,37HUB@33090|Viridiplantae,3G7PD@35493|Streptophyta,4JJFU@91835|fabids	35493|Streptophyta	U	Transmembrane emp24 domain-containing protein	-	GO:0005575,GO:0005622,GO:0005623,GO:0005737,GO:0005773,GO:0005783,GO:0005794,GO:0012505,GO:0043226,GO:0043227,GO:0043229,GO:0043231,GO:0044424,GO:0044444,GO:0044464	-	ko:K20347	-	-	-	-	ko00000,ko02000,ko04131	9.B.188.1.2	-	-	EMP24_GP25L
VLG9_000311	3760.EMJ22402	1.78e-65	207	KOG4585@1|root,KOG4585@2759|Eukaryota	2759|Eukaryota	B	nuclease activity	-	-	-	-	-	-	-	-	-	-	-	-	-
VLG9_001634	3750.XP_008337581.1	3.07e-19	82	COG1231@1|root,KOG0029@2759|Eukaryota,37SBR@33090|Viridiplantae,3GF1X@35493|Streptophyta,4JKHA@91835|fabids	35493|Streptophyta	Q	Phytoene dehydrogenase, chloroplastic	PDS	GO:0003674,GO:0003824,GO:0005575,GO:0005622,GO:0005623,GO:0005737,GO:0006629,GO:0006720,GO:0006721,GO:0008150,GO:0008152,GO:0008299,GO:0008610,GO:0009058,GO:0009507,GO:0009526,GO:0009534,GO:0009536,GO:0009579,GO:0009941,GO:0009987,GO:0016108,GO:0016109,GO:0016114,GO:0016116,GO:0016117,GO:0016166,GO:0016491,GO:0016627,GO:0031967,GO:0031975,GO:0031976,GO:0031984,GO:0042440,GO:0043226,GO:0043227,GO:…	1.3.5.5	ko:K02293	ko00906,ko01100,ko01110,map00906,map01100,map01110	M00097	R04786,R04787,R07510,R09652,R09653,R09654	RC01214,RC01958,RC03092,RC03093	ko00000,ko00001,ko00002,ko01000	-	-	-	Amino_oxidase
VLG9_001286	225117.XP_009379014.1	1.19e-114	336	28JND@1|root,2QS1J@2759|Eukaryota,37KAB@33090|Viridiplantae,3GBZ7@35493|Streptophyta,4JG2X@91835|fabids	35493|Streptophyta	I	enoyl-CoA delta isomerase 2, peroxisomal-like	-	GO:0001101,GO:0003674,GO:0003824,GO:0004165,GO:0005575,GO:0005622,GO:0005623,GO:0005634,GO:0005737,GO:0005777,GO:0005829,GO:0006082,GO:0006629,GO:0006631,GO:0006725,GO:0006807,GO:0007275,GO:0008150,GO:0008152,GO:0009056,GO:0009062,GO:0009628,GO:0009653,GO:0009719,GO:0009725,GO:0009733,GO:0009850,GO:0009888,GO:0009987,GO:0010015,GO:0010033,GO:0010053,GO:0010054,GO:0010243,GO:0010817,GO:0014070,GO:…	4.2.1.134	ko:K18880	ko00062,ko01110,ko04626,map00062,map01110,map04626	-	-	-	ko00000,ko00001,ko01000	-	-	-	ECH_1
VLG9_001270	225117.XP_009335496.1	1.44e-56	197	COG0666@1|root,KOG0504@2759|Eukaryota,37RBK@33090|Viridiplantae,3GGQ6@35493|Streptophyta,4JREH@91835|fabids	35493|Streptophyta	S	ankyrin repeat-containing protein	-	GO:0005575,GO:0005622,GO:0005623,GO:0005737,GO:0005783,GO:0005886,GO:0012505,GO:0016020,GO:0043226,GO:0043227,GO:0043229,GO:0043231,GO:0044424,GO:0044444,GO:0044464,GO:0071944	-	ko:K15502,ko:K15503	-	-	-	-	ko00000,ko01009,ko03400	-	-	-	Ank,Ank_2,Ank_3,Ank_4,Ank_5,PGG
VLG9_000363	90675.XP_010484057.1	7.69e-33	117	2DZW8@1|root,2S7CQ@2759|Eukaryota,37X9G@33090|Viridiplantae,3GM8N@35493|Streptophyta,3I0YH@3699|Brassicales	35493|Streptophyta	S	Plant self-incompatibility protein S1	-	-	-	-	-	-	-	-	-	-	-	-	Self-incomp_S1
VLG9_000362	102107.XP_008224120.1	1.14e-39	137	2DZW8@1|root,2S7CQ@2759|Eukaryota,37X9G@33090|Viridiplantae,3GM8N@35493|Streptophyta,4JUR1@91835|fabids	35493|Streptophyta	S	Encoded by	-	-	-	-	-	-	-	-	-	-	-	-	Self-incomp_S1
VLG9_000368	981085.XP_010097419.1	4.98e-32	118	2DZW8@1|root,2S7CQ@2759|Eukaryota,37X9G@33090|Viridiplantae,3GM8N@35493|Streptophyta,4JUR1@91835|fabids	35493|Streptophyta	S	Encoded by	-	-	-	-	-	-	-	-	-	-	-	-	Self-incomp_S1
VLG9_001290	85681.XP_006420907.1	1.22e-64	211	COG3491@1|root,KOG0143@2759|Eukaryota,37P1N@33090|Viridiplantae,3GDY3@35493|Streptophyta	35493|Streptophyta	Q	Belongs to the iron ascorbate-dependent oxidoreductase family	-	-	-	-	-	-	-	-	-	-	-	-	2OG-FeII_Oxy,DIOX_N
VLG9_001707	3641.EOY29543	4.12e-88	315	COG4886@1|root,2QQYD@2759|Eukaryota,37P0C@33090|Viridiplantae,3G8IW@35493|Streptophyta	35493|Streptophyta	T	LRR receptor-like serine threonine-protein kinase	-	-	-	-	-	-	-	-	-	-	-	-	LRRNT_2,LRR_1,LRR_8,Pkinase,Pkinase_Tyr
VLG9_000814	29760.VIT_05s0077g01310.t01	7.12e-190	537	28KCJ@1|root,2QSTH@2759|Eukaryota,37T76@33090|Viridiplantae,3GDXE@35493|Streptophyta	35493|Streptophyta	S	3-oxo-Delta(4,5)-steroid 5-beta-reductase-like	-	-	1.3.1.3	ko:K22419	-	-	-	-	ko00000,ko01000	-	-	-	Epimerase
VLG9_000440	3641.EOY29543	1.21e-82	296	COG4886@1|root,2QQYD@2759|Eukaryota,37P0C@33090|Viridiplantae,3G8IW@35493|Streptophyta	35493|Streptophyta	T	LRR receptor-like serine threonine-protein kinase	-	-	-	-	-	-	-	-	-	-	-	-	LRRNT_2,LRR_1,LRR_8,Pkinase,Pkinase_Tyr
VLG9_000442	3694.POPTR_0019s14340.1	7.63e-87	303	COG4886@1|root,2QQYD@2759|Eukaryota,37P0C@33090|Viridiplantae,3G8IW@35493|Streptophyta,4JRJ0@91835|fabids	35493|Streptophyta	T	Receptor protein kinase-like protein	-	-	-	-	-	-	-	-	-	-	-	-	LRRNT_2,LRR_1,LRR_4,LRR_6,LRR_8,Pkinase
VLG9_001324	3880.AET00978	1.2e-12	67.8	COG5178@1|root,KOG1795@2759|Eukaryota,37M6Q@33090|Viridiplantae,3GE28@35493|Streptophyta,4JJX2@91835|fabids	35493|Streptophyta	A	pre-mRNA-processing-splicing factor	-	-	-	ko:K12856	ko03040,map03040	M00354,M00355	-	-	ko00000,ko00001,ko00002,ko03041	-	-	-	JAB,PRO8NT,PROCN,PROCT,PRP8_domainIV,RRM_4,U5_2-snRNA_bdg,U6-snRNA_bdg
VLG9_000419	29730.Gorai.001G100700.1	1.71e-114	384	COG4886@1|root,KOG0619@2759|Eukaryota,37JQI@33090|Viridiplantae,3G814@35493|Streptophyta	35493|Streptophyta	P	LRR receptor-like serine threonine-protein kinase	-	GO:0003674,GO:0003824,GO:0004672,GO:0004674,GO:0004675,GO:0004888,GO:0005575,GO:0005622,GO:0005623,GO:0005737,GO:0005768,GO:0005886,GO:0006464,GO:0006468,GO:0006793,GO:0006796,GO:0006807,GO:0006810,GO:0006897,GO:0006898,GO:0006950,GO:0006952,GO:0007154,GO:0007165,GO:0007166,GO:0007167,GO:0007178,GO:0008150,GO:0008152,GO:0009595,GO:0009605,GO:0009607,GO:0009617,GO:0009888,GO:0009987,GO:0010073,GO:…	-	-	-	-	-	-	-	-	-	-	LRRNT_2,LRR_1,LRR_6,LRR_8
VLG9_000438	29760.VIT_12s0142g00780.t01	4.38e-15	74.7	COG4886@1|root,2QQYD@2759|Eukaryota,37P0C@33090|Viridiplantae,3G8IW@35493|Streptophyta	35493|Streptophyta	T	LRR receptor-like serine threonine-protein kinase	-	-	-	-	-	-	-	-	-	-	-	-	LRRNT_2,LRR_1,LRR_6,LRR_8,Pkinase
VLG9_000056	2711.XP_006478657.1	9.06e-55	190	294BT@1|root,2RB8Z@2759|Eukaryota,37ZW5@33090|Viridiplantae,3GJU0@35493|Streptophyta	35493|Streptophyta	S	Viral movement protein (MP)	-	-	-	-	-	-	-	-	-	-	-	-	MP
VLG9_000015	3760.EMJ04554	0	1276	KOG4197@1|root,KOG4197@2759|Eukaryota,37PE5@33090|Viridiplantae,3G79C@35493|Streptophyta,4JIS5@91835|fabids	35493|Streptophyta	S	Pentatricopeptide repeat-containing protein	-	-	-	ko:K02140	ko00190,ko01100,ko04714,map00190,map01100,map04714	M00158	-	-	ko00000,ko00001,ko00002	3.A.2.1	-	-	DYW_deaminase,PPR,PPR_2,PPR_3
VLG9_000091	3641.EOY09207	1.46e-16	78.6	2CQKX@1|root,2R54Q@2759|Eukaryota,38AWC@33090|Viridiplantae,3GMKK@35493|Streptophyta	35493|Streptophyta	S	Encoded by	-	-	-	-	-	-	-	-	-	-	-	-	Prolamin_like
VLG9_000577	29730.Gorai.005G046200.1	1.78e-20	86.3	2CYCQ@1|root,2S3KV@2759|Eukaryota,37W49@33090|Viridiplantae,3GK3U@35493|Streptophyta	35493|Streptophyta	S	Pet100	-	-	-	ko:K18187	-	-	-	-	ko00000,ko03029	-	-	-	Pet100
VLG9_000118	3760.EMJ26721	1.64e-88	271	29QCU@1|root,2QQMU@2759|Eukaryota,37TBM@33090|Viridiplantae,3GICW@35493|Streptophyta,4JP34@91835|fabids	35493|Streptophyta	S	Voltage-gated hydrogen channel	-	-	-	-	-	-	-	-	-	-	-	-	-
VLG9_000108	981085.XP_010105205.1	1.73e-219	622	KOG4569@1|root,KOG4569@2759|Eukaryota,37P2R@33090|Viridiplantae,3G9X5@35493|Streptophyta,4JE7K@91835|fabids	35493|Streptophyta	I	Galactolipase DONGLE	-	GO:0000003,GO:0001558,GO:0003006,GO:0003674,GO:0003824,GO:0004620,GO:0004806,GO:0005575,GO:0005622,GO:0005623,GO:0005737,GO:0005739,GO:0005811,GO:0006082,GO:0006629,GO:0006638,GO:0006639,GO:0006641,GO:0006950,GO:0006952,GO:0006996,GO:0007275,GO:0007568,GO:0008150,GO:0008152,GO:0008970,GO:0009056,GO:0009058,GO:0009507,GO:0009532,GO:0009536,GO:0009570,GO:0009605,GO:0009607,GO:0009611,GO:0009620,GO:…	-	-	-	-	-	-	-	-	-	-	Lipase_3
VLG9_000581	102107.XP_008224214.1	2.69e-28	120	2CMWC@1|root,2QSD3@2759|Eukaryota,37ISX@33090|Viridiplantae,3GDPJ@35493|Streptophyta,4JKGP@91835|fabids	35493|Streptophyta	-	-	-	-	-	-	-	-	-	-	-	-	-	-	-
VLG9_000521	102107.XP_008229456.1	8.17e-18	91.3	COG4886@1|root,2QQYD@2759|Eukaryota,37P0C@33090|Viridiplantae,3G8IW@35493|Streptophyta	35493|Streptophyta	T	LRR receptor-like serine threonine-protein kinase	-	-	-	-	-	-	-	-	-	-	-	-	LRRNT_2,LRR_1,LRR_8,Pkinase,Pkinase_Tyr
VLG9_000198	3641.EOY07134	5.29e-93	312	COG4886@1|root,KOG0619@2759|Eukaryota,37J1Y@33090|Viridiplantae,3GFFF@35493|Streptophyta	35493|Streptophyta	S	receptor-like protein	-	GO:0008150,GO:0009888,GO:0010073,GO:0032501,GO:0032502,GO:0048507,GO:0048856	-	-	-	-	-	-	-	-	-	-	LRRNT_2,LRR_1,LRR_6,LRR_8
VLG9_000187	3641.EOY13435	2.86e-16	77.8	COG4886@1|root,KOG0619@2759|Eukaryota,37IH3@33090|Viridiplantae,3GGP1@35493|Streptophyta	35493|Streptophyta	B	receptor-like protein 12	-	-	-	-	-	-	-	-	-	-	-	-	LRRNT_2,LRR_1,LRR_8
VLG9_001033	3988.XP_002516901.1	2.26e-57	184	COG2036@1|root,KOG0869@2759|Eukaryota,37UHX@33090|Viridiplantae,3GIUN@35493|Streptophyta,4JU9N@91835|fabids	35493|Streptophyta	K	Nuclear transcription factor Y subunit	-	-	-	ko:K08065	ko04612,ko05152,ko05166,map04612,map05152,map05166	-	-	-	ko00000,ko00001,ko03000	-	-	-	CBFD_NFYB_HMF
VLG9_001454	3983.cassava4.1_024868m	5.94e-12	70.9	2B6NT@1|root,2S0MJ@2759|Eukaryota,37UTK@33090|Viridiplantae,3GIGZ@35493|Streptophyta,4JPFD@91835|fabids	35493|Streptophyta	S	f-box protein	-	GO:0000151,GO:0003674,GO:0003824,GO:0004842,GO:0005575,GO:0005622,GO:0005623,GO:0005634,GO:0005730,GO:0005737,GO:0006464,GO:0006508,GO:0006511,GO:0006807,GO:0007154,GO:0007165,GO:0008150,GO:0008152,GO:0009056,GO:0009057,GO:0009719,GO:0009725,GO:0009741,GO:0009742,GO:0009755,GO:0009966,GO:0009967,GO:0009987,GO:0010033,GO:0010646,GO:0010647,GO:0014070,GO:0016567,GO:0016740,GO:0019005,GO:0019538,GO:…	-	-	-	-	-	-	-	-	-	-	DUF295,F-box
VLG9_000151	57918.XP_004296680.1	1.7e-25	110	COG0631@1|root,KOG0698@2759|Eukaryota,37Y71@33090|Viridiplantae,3GNM2@35493|Streptophyta,4JT2V@91835|fabids	35493|Streptophyta	T	phosphatase 2c	-	-	-	-	-	-	-	-	-	-	-	-	PP2C
VLG9_001072	3983.cassava4.1_028213m	1.63e-08	62	2CNED@1|root,2QVMN@2759|Eukaryota,37RYD@33090|Viridiplantae,3G7Z3@35493|Streptophyta,4JDMS@91835|fabids	35493|Streptophyta	S	f-box protein	-	-	-	-	-	-	-	-	-	-	-	-	F-box,FBA_1
VLG9_000612	102107.XP_008224291.1	1.22e-80	244	COG1670@1|root,2RZFF@2759|Eukaryota,37UKC@33090|Viridiplantae,3GJ8V@35493|Streptophyta,4JRPW@91835|fabids	35493|Streptophyta	J	Acetyltransferase (GNAT) domain	-	-	-	-	-	-	-	-	-	-	-	-	Acetyltransf_3
VLG9_000204	4096.XP_009769365.1	2.57e-18	85.1	COG4886@1|root,KOG0619@2759|Eukaryota	2759|Eukaryota	U	regulation of response to stimulus	-	-	-	-	-	-	-	-	-	-	-	-	LRRNT_2,LRR_1,LRR_6,LRR_8
VLG9_000229	3750.XP_008339518.1	2.83e-28	115	COG0474@1|root,KOG0204@2759|Eukaryota,37RJZ@33090|Viridiplantae,3GACQ@35493|Streptophyta,4JK0X@91835|fabids	35493|Streptophyta	P	calcium-transporting ATPase 13, plasma	-	GO:0003674,GO:0003824,GO:0005215,GO:0005388,GO:0005575,GO:0005622,GO:0005623,GO:0005886,GO:0005887,GO:0006810,GO:0006811,GO:0006812,GO:0006816,GO:0008150,GO:0008324,GO:0015075,GO:0015085,GO:0015318,GO:0015399,GO:0015405,GO:0015662,GO:0016020,GO:0016021,GO:0016462,GO:0016787,GO:0016817,GO:0016818,GO:0016887,GO:0017111,GO:0019829,GO:0022804,GO:0022853,GO:0022857,GO:0022890,GO:0030001,GO:0031224,GO:…	3.6.3.8	ko:K01537	-	-	-	-	ko00000,ko01000	3.A.3.2	-	-	Cation_ATPase,Cation_ATPase_C,Cation_ATPase_N,E1-E2_ATPase,Hydrolase
VLG9_001508	3750.XP_008339600.1	2.61e-19	85.1	KOG2699@1|root,KOG2699@2759|Eukaryota,37HQ9@33090|Viridiplantae,3GF2S@35493|Streptophyta,4JN6H@91835|fabids	35493|Streptophyta	O	UBX domain-containing protein	-	-	-	-	-	-	-	-	-	-	-	-	PUB,UBA
VLG9_001528	3760.EMJ24607	1.12e-10	62.4	COG4886@1|root,2QQYD@2759|Eukaryota,37P0C@33090|Viridiplantae,3G8IW@35493|Streptophyta	35493|Streptophyta	T	LRR receptor-like serine threonine-protein kinase	-	-	-	-	-	-	-	-	-	-	-	-	LRRNT_2,LRR_1,LRR_8,Pkinase,Pkinase_Tyr
VLG9_001527	71139.XP_010064756.1	1.65e-43	154	COG4886@1|root,2QQYD@2759|Eukaryota,37P0C@33090|Viridiplantae,3G8IW@35493|Streptophyta	35493|Streptophyta	T	LRR receptor-like serine threonine-protein kinase	-	-	2.7.11.1	ko:K04730	ko04010,ko04064,ko04620,ko04624,ko04722,ko05133,ko05140,ko05142,ko05145,ko05152,ko05162,ko05169,map04010,map04064,map04620,map04624,map04722,map05133,map05140,map05142,map05145,map05152,map05162,map05169	M00686	-	-	ko00000,ko00001,ko00002,ko01000,ko01001	-	-	-	LRRNT_2,LRR_1,LRR_8,Pkinase
VLG9_001588	4006.Lus10041224	3.15e-21	97.8	KOG1339@1|root,KOG1339@2759|Eukaryota,37Q1N@33090|Viridiplantae,3G89Y@35493|Streptophyta,4JIDB@91835|fabids	35493|Streptophyta	O	Belongs to the peptidase A1 family	-	-	-	-	-	-	-	-	-	-	-	-	TAXi_C,TAXi_N
VLG9_000242	3641.EOX92949	2.03e-62	202	COG4870@1|root,KOG1543@2759|Eukaryota,37RR0@33090|Viridiplantae,3GCD2@35493|Streptophyta	35493|Streptophyta	O	Belongs to the peptidase C1 family	-	GO:0000003,GO:0000323,GO:0000325,GO:0002376,GO:0003006,GO:0003674,GO:0003824,GO:0004175,GO:0004197,GO:0005575,GO:0005576,GO:0005615,GO:0005618,GO:0005622,GO:0005623,GO:0005737,GO:0005764,GO:0005773,GO:0005783,GO:0006508,GO:0006807,GO:0006950,GO:0006952,GO:0006955,GO:0007275,GO:0008150,GO:0008152,GO:0008219,GO:0008233,GO:0008234,GO:0009056,GO:0009057,GO:0009505,GO:0009555,GO:0009605,GO:0009607,GO:…	-	ko:K16292	-	-	-	-	ko00000,ko01000,ko01002	-	-	-	Inhibitor_I29,Peptidase_C1
VLG9_000264	3760.EMJ22511	1.59e-71	235	KOG4197@1|root,KOG4197@2759|Eukaryota,37JMV@33090|Viridiplantae,3GEIQ@35493|Streptophyta,4JN6V@91835|fabids	35493|Streptophyta	S	Pentatricopeptide repeat-containing protein	-	-	-	-	-	-	-	-	-	-	-	-	DYW_deaminase,PPR
VLG9_001595	2711.XP_006489309.1	1.86e-11	69.7	KOG1339@1|root,KOG1339@2759|Eukaryota,37Q1N@33090|Viridiplantae,3G89Y@35493|Streptophyta	35493|Streptophyta	O	Belongs to the peptidase A1 family	-	-	-	-	-	-	-	-	-	-	-	-	TAXi_C,TAXi_N
VLG10_001325	981085.XP_010094297.1	1.28e-57	189	KOG3178@1|root,KOG3178@2759|Eukaryota,37T3K@33090|Viridiplantae,3G9GK@35493|Streptophyta,4JJQX@91835|fabids	35493|Streptophyta	S	Belongs to the class I-like SAM-binding methyltransferase superfamily. Cation-independent O- methyltransferase family	-	-	-	-	-	-	-	-	-	-	-	-	Dimerisation,Methyltransf_2
VLG10_001322	981085.XP_010094294.1	1.39e-94	286	KOG3178@1|root,KOG3178@2759|Eukaryota,37T3K@33090|Viridiplantae,3G9GK@35493|Streptophyta,4JJQX@91835|fabids	35493|Streptophyta	S	Belongs to the class I-like SAM-binding methyltransferase superfamily. Cation-independent O- methyltransferase family	-	-	-	-	-	-	-	-	-	-	-	-	Dimerisation,Methyltransf_2
VLG10_001345	2711.XP_006480225.1	1.76e-40	145	KOG3178@1|root,KOG3178@2759|Eukaryota,37T3K@33090|Viridiplantae,3G9GK@35493|Streptophyta	35493|Streptophyta	S	Belongs to the class I-like SAM-binding methyltransferase superfamily. Cation-independent O- methyltransferase family	-	-	-	-	-	-	-	-	-	-	-	-	Dimerisation,Methyltransf_2
VLG10_000042	981085.XP_010090705.1	2e-12	64.7	2E6J1@1|root,2SD8G@2759|Eukaryota,37XKZ@33090|Viridiplantae,3GMI3@35493|Streptophyta,4JR6H@91835|fabids	35493|Streptophyta	-	-	-	-	-	-	-	-	-	-	-	-	-	-	-
VLG10_001388	3760.EMJ18243	2.72e-128	397	COG0515@1|root,2QTV8@2759|Eukaryota,37QQZ@33090|Viridiplantae,3GA4I@35493|Streptophyta,4JFNV@91835|fabids	35493|Streptophyta	T	G-type lectin S-receptor-like serine threonine-protein kinase	-	GO:0003674,GO:0003824,GO:0004672,GO:0004674,GO:0005488,GO:0005515,GO:0005516,GO:0005575,GO:0005623,GO:0005886,GO:0006464,GO:0006468,GO:0006793,GO:0006796,GO:0006807,GO:0008150,GO:0008152,GO:0009987,GO:0016020,GO:0016301,GO:0016310,GO:0016740,GO:0016772,GO:0016773,GO:0019538,GO:0036211,GO:0043170,GO:0043412,GO:0044237,GO:0044238,GO:0044260,GO:0044267,GO:0044464,GO:0071704,GO:0071944,GO:0140096,GO:…	-	-	-	-	-	-	-	-	-	-	B_lectin,DUF3403,GUB_WAK_bind,PAN_2,Pkinase_Tyr,S_locus_glycop
VLG10_000533	3750.XP_008342028.1	7.49e-23	103	28KH1@1|root,2QSY8@2759|Eukaryota,37P2H@33090|Viridiplantae,3GDXC@35493|Streptophyta,4JMK4@91835|fabids	35493|Streptophyta	K	WRKY transcription factor	-	GO:0001067,GO:0003674,GO:0003676,GO:0003677,GO:0003700,GO:0005488,GO:0006355,GO:0006950,GO:0007154,GO:0008150,GO:0009267,GO:0009605,GO:0009889,GO:0009890,GO:0009892,GO:0009987,GO:0009991,GO:0010033,GO:0010036,GO:0010200,GO:0010243,GO:0010468,GO:0010556,GO:0010558,GO:0010605,GO:0010629,GO:0016036,GO:0019219,GO:0019222,GO:0031323,GO:0031324,GO:0031326,GO:0031327,GO:0031667,GO:0031668,GO:0031669,GO:…	-	-	-	-	-	-	-	-	-	-	WRKY
VLG10_000554	3760.EMJ16274	8.85e-55	177	2AJ2Z@1|root,2RZ62@2759|Eukaryota,37UMG@33090|Viridiplantae,3GINX@35493|Streptophyta,4JPGQ@91835|fabids	35493|Streptophyta	S	Transmembrane protein 97-like	-	-	-	-	-	-	-	-	-	-	-	-	DUF2781
VLG10_001408	981085.XP_010109547.1	3.76e-106	315	2CMBP@1|root,2QPWH@2759|Eukaryota,37P33@33090|Viridiplantae,3GCX4@35493|Streptophyta,4JG46@91835|fabids	35493|Streptophyta	S	Cysteine-rich repeat secretory protein	-	GO:0001101,GO:0005575,GO:0005618,GO:0005622,GO:0005623,GO:0005737,GO:0005773,GO:0008150,GO:0009719,GO:0009725,GO:0009737,GO:0010033,GO:0030312,GO:0033993,GO:0042221,GO:0043226,GO:0043227,GO:0043229,GO:0043231,GO:0044424,GO:0044444,GO:0044464,GO:0050896,GO:0071944,GO:0097305,GO:1901700	-	-	-	-	-	-	-	-	-	-	DUF1204,Stress-antifung
VLG10_000579	2711.XP_006495035.1	5.07e-12	67	28MUD@1|root,2QUH3@2759|Eukaryota,37M76@33090|Viridiplantae,3G7DK@35493|Streptophyta	35493|Streptophyta	S	synthase	-	-	4.2.3.108,4.2.3.20,4.2.3.27	ko:K07385,ko:K12742,ko:K15096	ko00900,ko00902,ko01100,ko01110,map00900,map00902,map01100,map01110	-	R06120,R06421,R06422,R08199	RC00637,RC01512,RC02771,RC02773	ko00000,ko00001,ko01000	-	-	-	Terpene_synth,Terpene_synth_C
VLG10_000924	981085.XP_010109033.1	4.79e-52	171	COG5126@1|root,KOG0027@2759|Eukaryota,37VE2@33090|Viridiplantae,3GJIV@35493|Streptophyta,4JQ2V@91835|fabids	35493|Streptophyta	T	calcium-binding protein	-	GO:0001505,GO:0003674,GO:0005488,GO:0005509,GO:0008150,GO:0009909,GO:0019222,GO:0031323,GO:0043167,GO:0043169,GO:0046872,GO:0048580,GO:0048831,GO:0050789,GO:0050793,GO:0050794,GO:0051171,GO:0051239,GO:0065007,GO:0065008,GO:0080164,GO:2000026,GO:2000241,GO:2000377	-	ko:K13448	ko04626,map04626	-	-	-	ko00000,ko00001	-	-	-	EF-hand_1
VLG10_000967	3760.EMJ20804	2.05e-67	227	KOG1121@1|root,KOG1121@2759|Eukaryota,37T13@33090|Viridiplantae,3GEPR@35493|Streptophyta,4JVK0@91835|fabids	35493|Streptophyta	L	Domain of unknown function (DUF4413)	-	-	-	-	-	-	-	-	-	-	-	-	DUF4413,Dimer_Tnp_hAT,zf-BED
VLG10_001689	981085.XP_010089644.1	3.09e-181	523	2CMBZ@1|root,2QPXT@2759|Eukaryota,37NH3@33090|Viridiplantae,3G7NW@35493|Streptophyta,4JSDB@91835|fabids	35493|Streptophyta	S	phenolic glucoside malonyltransferase	-	GO:0003674,GO:0003824,GO:0005575,GO:0005622,GO:0005623,GO:0005737,GO:0005829,GO:0008150,GO:0008152,GO:0008374,GO:0009058,GO:0009718,GO:0009812,GO:0009813,GO:0016420,GO:0016740,GO:0016746,GO:0016747,GO:0042440,GO:0044424,GO:0044444,GO:0044464,GO:0046148,GO:0046283,GO:0047634,GO:0050736,GO:0071704,GO:1901576	2.3.1.64	ko:K14329	ko00330,map00330	-	R01617,R09255,R09256,R09257	RC00004,RC00096	ko00000,ko00001,ko01000	-	-	-	Transferase
VLG10_001247	57918.XP_004303190.1	3.92e-21	89.7	COG1813@1|root,KOG3398@2759|Eukaryota,37TRQ@33090|Viridiplantae,3GHY7@35493|Streptophyta,4JNYC@91835|fabids	35493|Streptophyta	K	Multiprotein-bridging factor	-	GO:0003674,GO:0003676,GO:0003712,GO:0003713,GO:0003723,GO:0003729,GO:0005488,GO:0005575,GO:0005622,GO:0005623,GO:0005634,GO:0005730,GO:0006355,GO:0008150,GO:0009889,GO:0009891,GO:0009893,GO:0010468,GO:0010556,GO:0010557,GO:0010604,GO:0010628,GO:0019219,GO:0019222,GO:0031323,GO:0031325,GO:0031326,GO:0031328,GO:0031974,GO:0031981,GO:0043226,GO:0043227,GO:0043228,GO:0043229,GO:0043231,GO:0043232,GO:…	-	ko:K03627	-	-	-	-	ko00000	-	-	-	HTH_3,MBF1
VLG10_000389	3760.EMJ17770	1.53e-16	75.5	KOG1192@1|root,KOG1192@2759|Eukaryota,37YWK@33090|Viridiplantae,3GNTU@35493|Streptophyta,4JRBN@91835|fabids	35493|Streptophyta	CG	UDP-Glycosyltransferase	-	-	2.4.1.324	ko:K21374	-	-	-	-	ko00000,ko01000,ko01003	-	GT1	-	UDPGT
VLG10_000396	3750.XP_008375675.1	1.39e-81	256	KOG1192@1|root,KOG1192@2759|Eukaryota,37YWK@33090|Viridiplantae,3GNTU@35493|Streptophyta,4JRBN@91835|fabids	35493|Streptophyta	CG	UDP-Glycosyltransferase	-	-	2.4.1.324	ko:K21374	-	-	-	-	ko00000,ko01000,ko01003	-	GT1	-	UDPGT
VLG10_000395	3694.POPTR_0098s00300.1	1.35e-64	213	KOG1192@1|root,KOG1192@2759|Eukaryota,37YWK@33090|Viridiplantae,3GNTU@35493|Streptophyta,4JRBN@91835|fabids	35493|Streptophyta	CG	UDP-Glycosyltransferase	-	-	2.4.1.324	ko:K21374	-	-	-	-	ko00000,ko01000,ko01003	-	GT1	-	UDPGT
VLG10_001764	29730.Gorai.012G057200.1	4.02e-61	203	COG1520@1|root,2QUFM@2759|Eukaryota,37M82@33090|Viridiplantae,3GEG2@35493|Streptophyta	33090|Viridiplantae	S	PQQ enzyme repeat	-	-	-	-	-	-	-	-	-	-	-	-	PQQ,PQQ_2,PQQ_3
VLG10_001310	102107.XP_008230396.1	1.65e-156	451	COG0657@1|root,KOG1515@2759|Eukaryota,37MSW@33090|Viridiplantae,3G9YR@35493|Streptophyta,4JNAT@91835|fabids	35493|Streptophyta	V	carboxylesterase 17	-	GO:0003674,GO:0003824,GO:0008150,GO:0008152,GO:0009056,GO:0016787	-	-	-	-	-	-	-	-	-	-	Abhydrolase_3
VLG10_000448	102107.XP_008230145.1	2.29e-18	89.4	COG4886@1|root,KOG0619@2759|Eukaryota,37IH3@33090|Viridiplantae,3GGP1@35493|Streptophyta	35493|Streptophyta	B	receptor-like protein 12	-	-	-	ko:K19613	ko04014,map04014	-	-	-	ko00000,ko00001	-	-	-	LRRNT_2,LRR_1,LRR_6,LRR_8
VLG10_001775	102107.XP_008230712.1	4.58e-273	759	KOG4197@1|root,KOG4197@2759|Eukaryota,37J1H@33090|Viridiplantae,3GEDB@35493|Streptophyta,4JRID@91835|fabids	35493|Streptophyta	S	Pentatricopeptide repeat-containing protein	-	GO:0003674,GO:0003676,GO:0003723,GO:0003824,GO:0004518,GO:0004519,GO:0005488,GO:0005575,GO:0005622,GO:0005623,GO:0006139,GO:0006725,GO:0006807,GO:0008150,GO:0008152,GO:0009451,GO:0009987,GO:0016070,GO:0016071,GO:0016556,GO:0016787,GO:0016788,GO:0034641,GO:0043170,GO:0043226,GO:0043227,GO:0043229,GO:0043231,GO:0043412,GO:0044237,GO:0044238,GO:0044424,GO:0044464,GO:0046483,GO:0071704,GO:0090304,GO:…	-	-	-	-	-	-	-	-	-	-	PPR
VLG10_000450	57918.XP_004303558.1	1.77e-87	262	2B0BD@1|root,2S07N@2759|Eukaryota,37UYN@33090|Viridiplantae,3GJ1I@35493|Streptophyta,4JPRT@91835|fabids	35493|Streptophyta	S	f-box protein	-	GO:0000151,GO:0001101,GO:0005575,GO:0005622,GO:0005623,GO:0006508,GO:0006511,GO:0006807,GO:0007154,GO:0007165,GO:0008150,GO:0008152,GO:0009056,GO:0009057,GO:0009719,GO:0009725,GO:0009739,GO:0009740,GO:0009755,GO:0009937,GO:0009966,GO:0009987,GO:0010033,GO:0010476,GO:0010498,GO:0010646,GO:0019005,GO:0019538,GO:0019941,GO:0023051,GO:0023052,GO:0030163,GO:0031461,GO:0032870,GO:0032991,GO:0033993,GO:…	-	-	-	-	-	-	-	-	-	-	F-box-like
VLG10_001177	71139.XP_010045893.1	2.06e-13	75.1	KOG4658@1|root,KOG4658@2759|Eukaryota,37YYU@33090|Viridiplantae	33090|Viridiplantae	T	NB-ARC domain	-	-	-	-	-	-	-	-	-	-	-	-	NB-ARC
VLG10_000242	981085.XP_010089561.1	6.74e-39	140	28INN@1|root,2QQZM@2759|Eukaryota,37JHV@33090|Viridiplantae,3GFDH@35493|Streptophyta,4JJ3B@91835|fabids	35493|Streptophyta	-	-	-	-	-	-	-	-	-	-	-	-	-	-	-
VLG10_000240	3649.evm.model.supercontig_398.3	2.25e-39	142	COG5594@1|root,KOG1134@2759|Eukaryota,37K84@33090|Viridiplantae,3GCA2@35493|Streptophyta,3HYBA@3699|Brassicales	35493|Streptophyta	E	Cytosolic domain of 10TM putative phosphate transporter	-	-	-	ko:K21989	-	-	-	-	ko00000,ko02000	-	-	-	PHM7_cyt,RSN1_7TM,RSN1_TM
VLG10_001561	3750.XP_008350111.1	9.12e-35	134	COG3158@1|root,2SHZ5@2759|Eukaryota,37YW8@33090|Viridiplantae,3GP4P@35493|Streptophyta,4JVW8@91835|fabids	35493|Streptophyta	P	Potassium transporter 5-like	-	-	-	ko:K03549	-	-	-	-	ko00000,ko02000	2.A.72	-	-	K_trans
VLG10_000288	3694.POPTR_0017s13370.1	3.42e-19	86.3	COG5147@1|root,KOG0048@2759|Eukaryota,37TGU@33090|Viridiplantae,3GGY2@35493|Streptophyta,4JSG5@91835|fabids	35493|Streptophyta	K	Myb-related protein	-	GO:0000981,GO:0000988,GO:0000989,GO:0001067,GO:0001076,GO:0001101,GO:0001134,GO:0001135,GO:0003674,GO:0003676,GO:0003677,GO:0003700,GO:0005488,GO:0005575,GO:0005622,GO:0005623,GO:0005634,GO:0006355,GO:0006357,GO:0008150,GO:0009719,GO:0009725,GO:0009751,GO:0009889,GO:0009987,GO:0010033,GO:0010468,GO:0010556,GO:0014070,GO:0019219,GO:0019222,GO:0030154,GO:0031323,GO:0031326,GO:0032502,GO:0042221,GO:…	-	ko:K09422	-	-	-	-	ko00000,ko03000	-	-	-	Myb_DNA-binding
VLG10_001154	4572.TRIUR3_18785-P1	5.04e-30	115	2EUMC@1|root,2SWRW@2759|Eukaryota,382GG@33090|Viridiplantae,3GRBY@35493|Streptophyta	35493|Streptophyta	-	-	-	-	-	-	-	-	-	-	-	-	-	-	-
VLG10_000296	981085.XP_010097820.1	8.19e-42	147	COG4826@1|root,KOG2392@2759|Eukaryota	2759|Eukaryota	O	serine-type endopeptidase inhibitor activity	-	GO:0003674,GO:0004857,GO:0004866,GO:0004867,GO:0004869,GO:0005575,GO:0005576,GO:0005615,GO:0005622,GO:0005623,GO:0005737,GO:0008150,GO:0009892,GO:0010466,GO:0010605,GO:0010951,GO:0019222,GO:0030162,GO:0030234,GO:0030414,GO:0031323,GO:0031324,GO:0032268,GO:0032269,GO:0043086,GO:0044092,GO:0044421,GO:0044424,GO:0044464,GO:0045861,GO:0048046,GO:0048519,GO:0048523,GO:0050789,GO:0050790,GO:0050794,GO:…	-	ko:K13963	ko05146,map05146	-	-	-	ko00000,ko00001	-	-	-	Serpin
VLG10_001608	3694.POPTR_2450s00200.1	7.72e-17	78.2	COG0515@1|root,2RMXX@2759|Eukaryota,37NC8@33090|Viridiplantae,3GDVX@35493|Streptophyta,4JSI7@91835|fabids	35493|Streptophyta	T	wall-associated receptor kinase-like	-	GO:0003674,GO:0003824,GO:0004672,GO:0004674,GO:0005575,GO:0005618,GO:0005623,GO:0005886,GO:0006464,GO:0006468,GO:0006793,GO:0006796,GO:0006807,GO:0007154,GO:0007165,GO:0007166,GO:0008150,GO:0008152,GO:0009505,GO:0009987,GO:0016020,GO:0016301,GO:0016310,GO:0016740,GO:0016772,GO:0016773,GO:0019538,GO:0023052,GO:0030312,GO:0036211,GO:0043170,GO:0043412,GO:0044237,GO:0044238,GO:0044260,GO:0044267,GO:…	2.7.11.1	ko:K04733	ko04010,ko04064,ko04620,ko04621,ko04624,ko04722,ko05133,ko05140,ko05142,ko05145,ko05152,ko05162,ko05164,map04010,map04064,map04620,map04621,map04624,map04722,map05133,map05140,map05142,map05145,map05152,map05162,map05164	M00686	-	-	ko00000,ko00001,ko00002,ko01000,ko01001	-	-	-	EGF_CA,GUB_WAK_bind,Pkinase,Pkinase_Tyr,WAK
VLG10_000305	3711.Bra027081.1-P	3.67e-10	60.8	2ETRK@1|root,2SW1C@2759|Eukaryota,381TK@33090|Viridiplantae,3GR4M@35493|Streptophyta	33090|Viridiplantae	O	Cell signaling peptide that may regulate plant stress, growth, and development. Mediates a rapid alkalinization of extracellular space by mediating a transient increase in the cytoplasmic Ca(2 ) concentration leading to a calcium-dependent signaling events through a cell surface receptor and a concomitant activation of some intracellular mitogen-activated protein kinases (By similarity)	-	-	-	-	-	-	-	-	-	-	-	-	RALF
VLG10_001663	981085.XP_010090973.1	1.43e-22	99	COG0372@1|root,COG1024@1|root,KOG1683@2759|Eukaryota,KOG2617@2759|Eukaryota	2759|Eukaryota	C	citrate (Si)-synthase activity	ECI1	GO:0003674,GO:0003824,GO:0004165,GO:0004300,GO:0005488,GO:0005515,GO:0005575,GO:0005622,GO:0005623,GO:0005737,GO:0005739,GO:0005759,GO:0005777,GO:0006082,GO:0006629,GO:0006631,GO:0006635,GO:0008150,GO:0008152,GO:0009056,GO:0009062,GO:0009514,GO:0009987,GO:0016042,GO:0016054,GO:0016829,GO:0016835,GO:0016836,GO:0016853,GO:0016860,GO:0016863,GO:0019395,GO:0019752,GO:0030258,GO:0031974,GO:0032787,GO:…	2.3.3.1,5.3.3.8	ko:K01647,ko:K13238	ko00020,ko00071,ko00630,ko01100,ko01110,ko01120,ko01130,ko01200,ko01210,ko01230,map00020,map00071,map00630,map01100,map01110,map01120,map01130,map01200,map01210,map01230	M00009,M00010,M00012,M00740	R00351,R04756	RC00004,RC00067,RC01078	br01601,ko00000,ko00001,ko00002,ko01000	-	-	-	Citrate_synt,ECH_1
VLG10_000740	57918.XP_004303127.1	4.29e-59	197	KOG3178@1|root,KOG3178@2759|Eukaryota,37PX0@33090|Viridiplantae,3GFUM@35493|Streptophyta,4JF27@91835|fabids	35493|Streptophyta	S	Belongs to the class I-like SAM-binding methyltransferase superfamily. Cation-independent O- methyltransferase family	-	GO:0003674,GO:0003824,GO:0006725,GO:0008150,GO:0008152,GO:0008168,GO:0008171,GO:0008757,GO:0009058,GO:0009812,GO:0009987,GO:0016740,GO:0016741,GO:0019438,GO:0030761,GO:0032259,GO:0044237,GO:0044249,GO:0071704	2.1.1.240	ko:K16040	ko00945,map00945	-	R09872	RC00003,RC01558	ko00000,ko00001,ko01000	-	-	-	Dimerisation,Methyltransf_2
VLG10_001447	29760.VIT_12s0059g00820.t01	2.4e-47	154	29XXM@1|root,2QRR3@2759|Eukaryota,37T3Q@33090|Viridiplantae,3GJX7@35493|Streptophyta	35493|Streptophyta	S	Dirigent proteins impart stereoselectivity on the phenoxy radical-coupling reaction, yielding optically active lignans from two molecules of coniferyl alcohol in the biosynthesis of lignans, flavonolignans, and alkaloids and thus plays a central role in plant secondary metabolism	-	-	-	-	-	-	-	-	-	-	-	-	Dirigent
VLG10_000590	29760.VIT_12s0134g00440.t01	5.44e-51	176	COG1236@1|root,KOG1361@2759|Eukaryota,37QA5@33090|Viridiplantae,3GDPM@35493|Streptophyta	35493|Streptophyta	L	5' exonuclease	-	-	-	ko:K15341	-	-	-	-	ko00000,ko01000,ko03400	-	-	-	DRMBL
VLG10_000126	3760.EMJ18487	1.43e-14	78.2	COG5434@1|root,2QW1D@2759|Eukaryota,37I0Z@33090|Viridiplantae,3GC58@35493|Streptophyta,4JGRG@91835|fabids	35493|Streptophyta	G	Polygalacturonase	-	GO:0003674,GO:0003824,GO:0004553,GO:0004650,GO:0005575,GO:0005618,GO:0005623,GO:0008150,GO:0009664,GO:0009825,GO:0009827,GO:0009831,GO:0009987,GO:0016043,GO:0016049,GO:0016787,GO:0016798,GO:0030312,GO:0040007,GO:0042545,GO:0042547,GO:0044464,GO:0045229,GO:0071554,GO:0071555,GO:0071669,GO:0071840,GO:0071944	3.2.1.15,3.2.1.67	ko:K01184,ko:K01213	ko00040,ko01100,map00040,map01100	M00081	R01982,R02360,R07413	RC00049	ko00000,ko00001,ko00002,ko01000	-	-	-	Glyco_hydro_28
VLG10_001008	3750.XP_008351106.1	3.07e-149	470	COG4886@1|root,KOG0619@2759|Eukaryota,37IH3@33090|Viridiplantae,3GGP1@35493|Streptophyta,4JS40@91835|fabids	35493|Streptophyta	T	Receptor-like protein 12	-	GO:0008150,GO:0009888,GO:0010073,GO:0032501,GO:0032502,GO:0048507,GO:0048856	-	-	-	-	-	-	-	-	-	-	LRRNT_2,LRR_1,LRR_6,LRR_8
VLG10_001035	981085.XP_010108876.1	2.77e-53	176	2E29M@1|root,2S9HP@2759|Eukaryota,37WZX@33090|Viridiplantae,3GKIE@35493|Streptophyta,4JQK9@91835|fabids	35493|Streptophyta	-	-	-	-	-	-	-	-	-	-	-	-	-	-	-
VLG10_000184	225117.XP_009335806.1	6.83e-46	161	COG0465@1|root,KOG0743@2759|Eukaryota,37QYB@33090|Viridiplantae,3G9CY@35493|Streptophyta,4JM9D@91835|fabids	35493|Streptophyta	O	Belongs to the AAA ATPase family	-	GO:0003674,GO:0005215,GO:0005575,GO:0005622,GO:0005623,GO:0005737,GO:0005739,GO:0006810,GO:0008104,GO:0008150,GO:0008320,GO:0008565,GO:0009987,GO:0015031,GO:0015833,GO:0016043,GO:0022607,GO:0022857,GO:0022884,GO:0033036,GO:0034622,GO:0042886,GO:0042887,GO:0043226,GO:0043227,GO:0043229,GO:0043231,GO:0043933,GO:0044085,GO:0044424,GO:0044444,GO:0044464,GO:0045184,GO:0051131,GO:0051179,GO:0051234,GO:…	-	ko:K08900	-	-	-	-	ko00000,ko03029	-	-	-	AAA,AAA_assoc
VLG10_001030	3641.EOY04119	7.09e-34	120	2CGZY@1|root,2S4G0@2759|Eukaryota,37WJ6@33090|Viridiplantae,3GKGC@35493|Streptophyta	35493|Streptophyta	S	Nonspecific lipid-transfer protein	-	-	-	-	-	-	-	-	-	-	-	-	LTP_2
VLG10_000658	3827.XP_004505621.1	3.52e-16	77.8	KOG3061@1|root,KOG3061@2759|Eukaryota,37U04@33090|Viridiplantae,3GHX3@35493|Streptophyta,4JPQZ@91835|fabids	35493|Streptophyta	O	cyclin-B1-2-like	-	-	-	ko:K11599	ko03050,map03050	-	-	-	ko00000,ko00001,ko03051	-	-	-	UMP1
VLG10_001505	981085.XP_010090718.1	4.71e-13	70.5	COG4886@1|root,KOG0619@2759|Eukaryota,37IH3@33090|Viridiplantae,3GGP1@35493|Streptophyta,4JS40@91835|fabids	35493|Streptophyta	T	Receptor-like protein 12	-	GO:0008150,GO:0009888,GO:0010073,GO:0032501,GO:0032502,GO:0048507,GO:0048856	-	-	-	-	-	-	-	-	-	-	LRRNT_2,LRR_1,LRR_6,LRR_8
VLG10_000220	2711.XP_006482605.1	5.83e-124	357	2B53S@1|root,2QPMT@2759|Eukaryota,37S0Q@33090|Viridiplantae,3GB10@35493|Streptophyta	35493|Streptophyta	S	pollen sperm cell differentiation	-	GO:0000003,GO:0000325,GO:0003006,GO:0005575,GO:0005622,GO:0005623,GO:0005737,GO:0005773,GO:0005774,GO:0005783,GO:0007275,GO:0007276,GO:0008150,GO:0009555,GO:0009705,GO:0009987,GO:0010256,GO:0012505,GO:0016020,GO:0016043,GO:0019953,GO:0022412,GO:0022414,GO:0030154,GO:0031090,GO:0032501,GO:0032502,GO:0032504,GO:0043226,GO:0043227,GO:0043229,GO:0043231,GO:0044422,GO:0044424,GO:0044437,GO:0044444,GO:…	-	-	-	-	-	-	-	-	-	-	DUF679
VLG10_000600	3641.EOX99255	0	965	28N2H@1|root,2QUMK@2759|Eukaryota,37SCY@33090|Viridiplantae,3GA3W@35493|Streptophyta	35493|Streptophyta	T	serine threonine-protein kinase	-	GO:0003674,GO:0003824,GO:0004672,GO:0004674,GO:0005488,GO:0005515,GO:0005516,GO:0005575,GO:0005623,GO:0005886,GO:0006464,GO:0006468,GO:0006793,GO:0006796,GO:0006807,GO:0008150,GO:0008152,GO:0009987,GO:0016020,GO:0016301,GO:0016310,GO:0016740,GO:0016772,GO:0016773,GO:0019538,GO:0036211,GO:0043170,GO:0043412,GO:0044237,GO:0044238,GO:0044260,GO:0044267,GO:0044464,GO:0071704,GO:0071944,GO:0140096,GO:…	2.7.11.1	ko:K04733	ko04010,ko04064,ko04620,ko04621,ko04624,ko04722,ko05133,ko05140,ko05142,ko05145,ko05152,ko05162,ko05164,map04010,map04064,map04620,map04621,map04624,map04722,map05133,map05140,map05142,map05145,map05152,map05162,map05164	M00686	-	-	ko00000,ko00001,ko00002,ko01000,ko01001	-	-	-	B_lectin,PAN_2,Pkinase,S_locus_glycop
VLG11_001562	4565.Traes_5DL_20FF8C565.1	5.34e-68	211	COG2036@1|root,KOG3467@2759|Eukaryota,37ZQ9@33090|Viridiplantae,3GPFG@35493|Streptophyta,3KZS7@4447|Liliopsida,3II7E@38820|Poales	35493|Streptophyta	B	Core component of nucleosome. Nucleosomes wrap and compact DNA into chromatin, limiting DNA accessibility to the cellular machineries which require DNA as a template. Histones thereby play a central role in transcription regulation, DNA repair, DNA replication and chromosomal stability. DNA accessibility is regulated via a complex set of post-translational modifications of histones, also called h…	-	-	-	ko:K11254	ko05034,ko05203,ko05322,map05034,map05203,map05322	-	-	-	ko00000,ko00001,ko03036	-	-	-	CENP-T_C
VLG11_001552	3641.EOY32130	8.35e-86	262	2D2GT@1|root,2SMUU@2759|Eukaryota,37ZK3@33090|Viridiplantae,3GPN7@35493|Streptophyta	35493|Streptophyta	-	-	-	-	-	-	-	-	-	-	-	-	-	-	C1_2
VLG11_000629	3988.XP_002526068.1	6.42e-27	108	KOG0498@1|root,KOG0498@2759|Eukaryota,37K37@33090|Viridiplantae,3GGPW@35493|Streptophyta,4JFFU@91835|fabids	35493|Streptophyta	PT	cyclic nucleotide-gated ion channel	-	GO:0002376,GO:0003674,GO:0005215,GO:0005216,GO:0005217,GO:0005221,GO:0005222,GO:0005242,GO:0005244,GO:0005249,GO:0005261,GO:0005262,GO:0005267,GO:0005488,GO:0005515,GO:0005516,GO:0005575,GO:0005623,GO:0005886,GO:0005887,GO:0006810,GO:0006811,GO:0006812,GO:0006813,GO:0006816,GO:0006950,GO:0006952,GO:0006955,GO:0007154,GO:0007165,GO:0007263,GO:0008150,GO:0008219,GO:0008324,GO:0009626,GO:0009987,GO:…	-	ko:K05391	ko04626,map04626	-	-	-	ko00000,ko00001,ko04040	1.A.1.5	-	-	Ion_trans,cNMP_binding
VLG11_001949	102107.XP_008231821.1	7.42e-63	212	COG0531@1|root,KOG1286@2759|Eukaryota,37JF4@33090|Viridiplantae,3GEF2@35493|Streptophyta,4JMDD@91835|fabids	35493|Streptophyta	E	cationic amino acid transporter	-	GO:0003333,GO:0003674,GO:0005215,GO:0005342,GO:0005575,GO:0005623,GO:0005886,GO:0006810,GO:0006811,GO:0006820,GO:0006865,GO:0008150,GO:0008509,GO:0008514,GO:0009605,GO:0009607,GO:0009624,GO:0015075,GO:0015171,GO:0015318,GO:0015711,GO:0015849,GO:0016020,GO:0022857,GO:0034220,GO:0043207,GO:0044464,GO:0046942,GO:0046943,GO:0050896,GO:0051179,GO:0051234,GO:0051704,GO:0051707,GO:0055085,GO:0071702,GO:…	-	ko:K03294,ko:K13863,ko:K13865	ko05206,map05206	-	-	-	ko00000,ko00001,ko02000	2.A.3.2,2.A.3.3.1,2.A.3.3.5	-	-	AA_permease_2,AA_permease_C
VLG11_001082	102107.XP_008234886.1	1.06e-297	839	KOG4197@1|root,KOG4197@2759|Eukaryota,37SVA@33090|Viridiplantae,3GEPK@35493|Streptophyta,4JGB0@91835|fabids	35493|Streptophyta	S	Pentatricopeptide repeat-containing protein	-	-	-	-	-	-	-	-	-	-	-	-	Cation_ATPase,E1-E2_ATPase,PPR,PPR_2,PhoLip_ATPase_C
VLG11_001069	981085.XP_010100771.1	2.6e-32	118	KOG3245@1|root,KOG3245@2759|Eukaryota,37WZA@33090|Viridiplantae,3GM44@35493|Streptophyta,4JR6D@91835|fabids	35493|Streptophyta	S	UPF0369 protein	-	-	-	-	-	-	-	-	-	-	-	-	DUF1674
VLG11_001060	29760.VIT_16s0022g01660.t01	1.19e-52	188	COG0515@1|root,KOG1187@2759|Eukaryota,37RNN@33090|Viridiplantae,3G8EG@35493|Streptophyta	35493|Streptophyta	T	receptor-like protein kinase	-	-	-	-	-	-	-	-	-	-	-	-	GUB_WAK_bind,Pkinase,Pkinase_Tyr
VLG11_000159	42345.XP_008801194.1	1.69e-21	87.4	COG0814@1|root,KOG1303@2759|Eukaryota,37RX4@33090|Viridiplantae,3GBCR@35493|Streptophyta,3KSVP@4447|Liliopsida	35493|Streptophyta	E	Transmembrane amino acid transporter protein	-	-	-	-	-	-	-	-	-	-	-	-	Aa_trans
VLG11_001480	29760.VIT_13s0019g02890.t01	3.89e-59	201	KOG1192@1|root,KOG1192@2759|Eukaryota,37KNH@33090|Viridiplantae,3GD2E@35493|Streptophyta	35493|Streptophyta	CG	Belongs to the UDP-glycosyltransferase family	-	-	2.4.1.323	ko:K21373	-	-	-	-	ko00000,ko01000,ko01003	-	GT1	-	UDPGT
VLG11_000183	90675.XP_010424184.1	2.82e-27	112	COG0659@1|root,KOG0236@2759|Eukaryota,37KFE@33090|Viridiplantae,3GATU@35493|Streptophyta,3HN9V@3699|Brassicales	35493|Streptophyta	P	sulfate transporter	-	GO:0003674,GO:0005215,GO:0005575,GO:0005623,GO:0005886,GO:0005887,GO:0006810,GO:0006811,GO:0006820,GO:0008150,GO:0008272,GO:0008509,GO:0015075,GO:0015103,GO:0015116,GO:0015318,GO:0015698,GO:0016020,GO:0016021,GO:0022857,GO:0031224,GO:0031226,GO:0034220,GO:0044425,GO:0044459,GO:0044464,GO:0051179,GO:0051234,GO:0055085,GO:0071944,GO:0072348,GO:0098656,GO:0098660,GO:0098661,GO:1901682,GO:1902358	-	ko:K17471	-	-	-	-	ko00000,ko02000	2.A.53.1	-	-	STAS,Sulfate_transp
VLG11_001683	3988.XP_002535403.1	3.22e-26	101	COG0515@1|root,KOG1187@2759|Eukaryota,37MEY@33090|Viridiplantae,3GC2U@35493|Streptophyta,4JTKF@91835|fabids	35493|Streptophyta	T	receptor-like protein kinase	-	-	-	-	-	-	-	-	-	-	-	-	GUB_WAK_bind,Pkinase,Pkinase_Tyr
VLG11_001680	29760.VIT_16s0148g00180.t01	6.59e-23	100	COG0515@1|root,KOG1187@2759|Eukaryota	2759|Eukaryota	KLT	protein serine/threonine kinase activity	-	-	2.7.11.1	ko:K04730	ko04010,ko04064,ko04620,ko04624,ko04722,ko05133,ko05140,ko05142,ko05145,ko05152,ko05162,ko05169,map04010,map04064,map04620,map04624,map04722,map05133,map05140,map05142,map05145,map05152,map05162,map05169	M00686	-	-	ko00000,ko00001,ko00002,ko01000,ko01001	-	-	-	GUB_WAK_bind,Pkinase,Pkinase_Tyr
VLG11_001213	981085.XP_010106821.1	3.54e-11	62.4	COG1404@1|root,2QRA7@2759|Eukaryota,37PHN@33090|Viridiplantae,3G8AA@35493|Streptophyta,4JSTH@91835|fabids	35493|Streptophyta	O	Subtilase family	-	GO:0005575,GO:0005576	-	-	-	-	-	-	-	-	-	-	Peptidase_S8
VLG11_000371	102107.XP_008233672.1	5.35e-53	172	2A95U@1|root,2SRDP@2759|Eukaryota,380KH@33090|Viridiplantae,3GQ6S@35493|Streptophyta,4JUNF@91835|fabids	35493|Streptophyta	S	RNA-directed DNA methylation 1	-	-	-	-	-	-	-	-	-	-	-	-	RdDM_RDM1
VLG11_000312	981085.XP_010096679.1	1.24e-118	359	2CMNH@1|root,2QQZX@2759|Eukaryota,37QMW@33090|Viridiplantae,3GGST@35493|Streptophyta,4JMPC@91835|fabids	35493|Streptophyta	S	Dirigent proteins impart stereoselectivity on the phenoxy radical-coupling reaction, yielding optically active lignans from two molecules of coniferyl alcohol in the biosynthesis of lignans, flavonolignans, and alkaloids and thus plays a central role in plant secondary metabolism	-	-	-	-	-	-	-	-	-	-	-	-	Dirigent
VLG11_001651	4006.Lus10040373	2.86e-27	110	28NHN@1|root,2QV36@2759|Eukaryota,37K79@33090|Viridiplantae,3G7JZ@35493|Streptophyta,4JH11@91835|fabids	35493|Streptophyta	S	LOB domain-containing protein	-	-	-	-	-	-	-	-	-	-	-	-	LOB
VLG11_001657	102107.XP_008232172.1	6.9e-96	300	COG0515@1|root,KOG1187@2759|Eukaryota,37MEY@33090|Viridiplantae,3GC2U@35493|Streptophyta,4JTKF@91835|fabids	35493|Streptophyta	T	receptor-like protein kinase	-	-	-	-	-	-	-	-	-	-	-	-	GUB_WAK_bind,Pkinase,Pkinase_Tyr
VLG11_001676	102107.XP_008232188.1	1.88e-106	330	COG0515@1|root,KOG1187@2759|Eukaryota,37MEY@33090|Viridiplantae,3GC2U@35493|Streptophyta,4JTKF@91835|fabids	35493|Streptophyta	T	receptor-like protein kinase	-	-	-	-	-	-	-	-	-	-	-	-	GUB_WAK_bind,Pkinase,Pkinase_Tyr
VLG11_000751	981085.XP_010107434.1	2.43e-191	543	28NTZ@1|root,2QVDX@2759|Eukaryota,37SNE@33090|Viridiplantae,3GCC7@35493|Streptophyta,4JTBG@91835|fabids	35493|Streptophyta	S	WD repeat-containing protein	-	GO:0000003,GO:0000151,GO:0000152,GO:0003006,GO:0003674,GO:0003824,GO:0004842,GO:0005488,GO:0005515,GO:0005575,GO:0005622,GO:0005623,GO:0005634,GO:0005654,GO:0006139,GO:0006259,GO:0006281,GO:0006464,GO:0006725,GO:0006807,GO:0006950,GO:0006974,GO:0006996,GO:0007275,GO:0008150,GO:0008152,GO:0009314,GO:0009411,GO:0009416,GO:0009605,GO:0009628,GO:0009639,GO:0009640,GO:0009641,GO:0009642,GO:0009646,GO:…	2.3.2.27	ko:K10143	ko04115,ko04120,ko04712,map04115,map04120,map04712	-	-	-	ko00000,ko00001,ko01000,ko04121	-	-	-	WD40
VLG11_001633	71139.XP_010042718.1	2.59e-17	83.2	28KFF@1|root,2QSWF@2759|Eukaryota	2759|Eukaryota	M	recognition of pollen	-	GO:0003674,GO:0003824,GO:0004672,GO:0004674,GO:0004675,GO:0004888,GO:0005488,GO:0005515,GO:0005516,GO:0005575,GO:0005622,GO:0005623,GO:0005737,GO:0005773,GO:0005886,GO:0005911,GO:0006464,GO:0006468,GO:0006793,GO:0006796,GO:0006807,GO:0007154,GO:0007165,GO:0007166,GO:0007167,GO:0007178,GO:0008150,GO:0008152,GO:0009506,GO:0009987,GO:0016020,GO:0016301,GO:0016310,GO:0016740,GO:0016772,GO:0016773,GO:…	-	-	-	-	-	-	-	-	-	-	B_lectin,DUF3403,PAN_2,Pkinase_Tyr,S_locus_glycop
VLG11_001175	3750.XP_008376559.1	1.87e-148	456	COG0249@1|root,KOG0218@2759|Eukaryota,37PDJ@33090|Viridiplantae,3GC5Z@35493|Streptophyta,4JI0E@91835|fabids	35493|Streptophyta	L	DNA mismatch repair	-	GO:0000217,GO:0000404,GO:0003674,GO:0003676,GO:0003677,GO:0003684,GO:0003690,GO:0003824,GO:0005488,GO:0005575,GO:0005622,GO:0005623,GO:0006139,GO:0006259,GO:0006281,GO:0006298,GO:0006725,GO:0006807,GO:0006950,GO:0006974,GO:0006996,GO:0008094,GO:0008150,GO:0008152,GO:0009987,GO:0016043,GO:0016462,GO:0016787,GO:0016817,GO:0016818,GO:0016887,GO:0017111,GO:0030983,GO:0032135,GO:0032300,GO:0032991,GO:…	-	ko:K08736	ko01524,ko03430,ko05200,ko05210,map01524,map03430,map05200,map05210	-	-	-	ko00000,ko00001,ko03400	-	-	-	MutS_I,MutS_II,MutS_III,MutS_IV,MutS_V
VLG11_001120	3760.EMJ22305	0	909	COG1131@1|root,KOG0061@2759|Eukaryota,37QXM@33090|Viridiplantae,3GDQ3@35493|Streptophyta,4JIF9@91835|fabids	35493|Streptophyta	Q	ABC transporter G family member	-	GO:0003674,GO:0003824,GO:0005215,GO:0005575,GO:0005623,GO:0005886,GO:0006810,GO:0008150,GO:0015399,GO:0015405,GO:0016020,GO:0016021,GO:0016462,GO:0016787,GO:0016817,GO:0016818,GO:0016887,GO:0017111,GO:0022804,GO:0022857,GO:0031224,GO:0042623,GO:0042626,GO:0043492,GO:0044425,GO:0044464,GO:0051179,GO:0051234,GO:0055085,GO:0071944	-	-	-	-	-	-	-	-	-	-	ABC2_membrane,ABC_tran
VLG11_000485	85681.XP_006427820.1	1.35e-19	84	COG4886@1|root,2QPYS@2759|Eukaryota,37Q18@33090|Viridiplantae,3GCT9@35493|Streptophyta	35493|Streptophyta	T	Belongs to the protein kinase superfamily. Ser Thr protein kinase family	-	GO:0005575,GO:0005623,GO:0005886,GO:0016020,GO:0044464,GO:0071944	-	-	-	-	-	-	-	-	-	-	LRRNT_2,LRR_1,LRR_8,Pkinase,Pkinase_Tyr
VLG11_000497	57918.XP_004307661.1	2.39e-31	132	COG4886@1|root,2QPYS@2759|Eukaryota,37Q18@33090|Viridiplantae,3GCT9@35493|Streptophyta,4JJB6@91835|fabids	35493|Streptophyta	T	Belongs to the protein kinase superfamily. Ser Thr protein kinase family	-	GO:0000003,GO:0003006,GO:0007275,GO:0008150,GO:0009790,GO:0009791,GO:0009793,GO:0009888,GO:0010065,GO:0010067,GO:0010087,GO:0010154,GO:0022414,GO:0032501,GO:0032502,GO:0048316,GO:0048507,GO:0048508,GO:0048608,GO:0048731,GO:0048856,GO:0061458	2.7.11.1	ko:K04730	ko04010,ko04064,ko04620,ko04624,ko04722,ko05133,ko05140,ko05142,ko05145,ko05152,ko05162,ko05169,map04010,map04064,map04620,map04624,map04722,map05133,map05140,map05142,map05145,map05152,map05162,map05169	M00686	-	-	ko00000,ko00001,ko00002,ko01000,ko01001	-	-	-	LRRNT_2,LRR_1,LRR_8,Pkinase,Pkinase_Tyr
VLG11_001762	3760.EMJ21099	8.44e-26	97.8	2E1Q8@1|root,2S90F@2759|Eukaryota,37WWW@33090|Viridiplantae,3GKWE@35493|Streptophyta,4JV5G@91835|fabids	35493|Streptophyta	S	DVL family	-	-	-	-	-	-	-	-	-	-	-	-	DVL
VLG11_001774	3847.GLYMA08G11650.1	1.56e-16	78.6	COG3424@1|root,2QRSY@2759|Eukaryota,37MT6@33090|Viridiplantae,3G7AK@35493|Streptophyta	35493|Streptophyta	H	Belongs to the chalcone stilbene synthases family	CHS3	GO:0003674,GO:0003824,GO:0008150,GO:0008152,GO:0009058,GO:0009812,GO:0009813,GO:0016210,GO:0016740,GO:0016746,GO:0016747,GO:0071704,GO:1901576	2.3.1.74	ko:K00660	ko00941,ko01100,ko01110,ko04712,map00941,map01100,map01110,map04712	M00137	R01613,R06568,R07987,R07988,R07989	RC00004,RC02726	ko00000,ko00001,ko00002,ko01000,ko01008	-	-	-	Chal_sti_synt_C,Chal_sti_synt_N
VLG11_001786	225117.XP_009368937.1	3.17e-273	768	28IZG@1|root,2QRB8@2759|Eukaryota,37KS8@33090|Viridiplantae,3GBDF@35493|Streptophyta,4JRQY@91835|fabids	35493|Streptophyta	S	Nodulin-like	-	-	-	-	-	-	-	-	-	-	-	-	MFS_1,Nodulin-like
VLG11_000456	29760.VIT_13s0019g02880.t01	5.56e-20	90.1	KOG1192@1|root,KOG1192@2759|Eukaryota,37P6G@33090|Viridiplantae,3GH1F@35493|Streptophyta	35493|Streptophyta	CG	UDP-Glycosyltransferase	-	GO:0003674,GO:0003824,GO:0005575,GO:0005622,GO:0005623,GO:0008194,GO:0016740,GO:0016757,GO:0016758,GO:0035251,GO:0043226,GO:0043227,GO:0043229,GO:0043231,GO:0044424,GO:0044464,GO:0046527,GO:0047254,GO:0080043,GO:0080044	1.14.14.1,2.4.1.202	ko:K07408,ko:K13227,ko:K13493	ko00140,ko00380,ko00402,ko00830,ko00908,ko00980,ko01100,ko01110,ko04913,ko05204,map00140,map00380,map00402,map00830,map00908,map00980,map01100,map01110,map04913,map05204	-	R02354,R02355,R03089,R03408,R03629,R04579,R07000,R07001,R07021,R07022,R07079,R07080,R07081,R07085,R07087,R07098,R07099,R07426,R08075,R08390,R08392,R09418,R09423,R09442	RC00005,RC00046,RC00049,RC00122,RC00661,RC00704,RC00723,RC00724,RC01444,RC01445,RC01727,RC01732,RC01733,RC02531	ko00000,ko00001,ko00199,ko01000,ko01003	-	GT1	-	UDPGT
VLG11_000898	4572.TRIUR3_23285-P1	3.2e-19	82.4	2EXND@1|root,2SZA1@2759|Eukaryota,381T7@33090|Viridiplantae,3GRWF@35493|Streptophyta	4572.TRIUR3_23285-P1|-	-	-	-	-	-	-	-	-	-	-	-	-	-	-	-
VLG11_000814	3649.evm.model.supercontig_3.17	1.06e-16	82	COG0469@1|root,KOG2323@2759|Eukaryota,37HK2@33090|Viridiplantae,3GCQC@35493|Streptophyta,3HYCX@3699|Brassicales	35493|Streptophyta	G	Pyruvate kinase	-	GO:0000003,GO:0000287,GO:0003006,GO:0003674,GO:0003824,GO:0004743,GO:0005488,GO:0005575,GO:0005622,GO:0005623,GO:0005737,GO:0005739,GO:0005975,GO:0006082,GO:0006090,GO:0006091,GO:0006096,GO:0006139,GO:0006163,GO:0006164,GO:0006165,GO:0006629,GO:0006631,GO:0006633,GO:0006725,GO:0006732,GO:0006733,GO:0006753,GO:0006754,GO:0006757,GO:0006793,GO:0006796,GO:0006807,GO:0007275,GO:0008150,GO:0008152,GO:…	2.7.1.40	ko:K00873	ko00010,ko00230,ko00620,ko01100,ko01110,ko01120,ko01130,ko01200,ko01230,ko04922,ko04930,ko05165,ko05203,ko05230,map00010,map00230,map00620,map01100,map01110,map01120,map01130,map01200,map01230,map04922,map04930,map05165,map05203,map05230	M00001,M00002,M00049,M00050	R00200,R00430,R01138,R01858,R02320	RC00002,RC00015	ko00000,ko00001,ko00002,ko01000,ko04131,ko04147	-	-	-	PK,PK_C
VLG11_001244	57918.XP_004307818.1	6.09e-271	756	KOG4197@1|root,KOG4197@2759|Eukaryota,37JQ9@33090|Viridiplantae,3GE4M@35493|Streptophyta,4JEJF@91835|fabids	35493|Streptophyta	F	Pentatricopeptide repeat-containing protein At4g25270	-	GO:0003674,GO:0003676,GO:0003723,GO:0003824,GO:0004518,GO:0004519,GO:0005488,GO:0005575,GO:0005622,GO:0005623,GO:0006139,GO:0006396,GO:0006725,GO:0006807,GO:0008150,GO:0008152,GO:0008380,GO:0009987,GO:0010467,GO:0016070,GO:0016787,GO:0016788,GO:0034641,GO:0043170,GO:0043226,GO:0043227,GO:0043229,GO:0043231,GO:0044237,GO:0044238,GO:0044424,GO:0044464,GO:0046483,GO:0071704,GO:0090304,GO:0090305,GO:…	2.7.4.14	ko:K13800	ko00240,ko00983,ko01100,map00240,map00983,map01100	M00052	R00158,R00512,R01665,R11891,R11892	RC00002	ko00000,ko00001,ko00002,ko01000	-	-	-	ADK,PPR,PPR_2
VLG11_001258	102107.XP_008234494.1	2.02e-43	159	COG1161@1|root,KOG1249@2759|Eukaryota,37N2S@33090|Viridiplantae,3G80S@35493|Streptophyta,4JH41@91835|fabids	35493|Streptophyta	S	NO-associated protein 1, chloroplastic	-	GO:0000302,GO:0001101,GO:0001505,GO:0003674,GO:0003824,GO:0003924,GO:0005575,GO:0005622,GO:0005623,GO:0005737,GO:0005739,GO:0006109,GO:0006807,GO:0006809,GO:0006950,GO:0006970,GO:0006979,GO:0006996,GO:0007275,GO:0008150,GO:0008152,GO:0009058,GO:0009507,GO:0009536,GO:0009628,GO:0009651,GO:0009657,GO:0009668,GO:0009889,GO:0009987,GO:0010027,GO:0010035,GO:0010193,GO:0010322,GO:0010565,GO:0010675,GO:…	1.14.13.39	ko:K13427	ko00220,ko00330,ko01100,ko01110,ko01130,ko04626,map00220,map00330,map01100,map01110,map01130,map04626	-	R00111,R00557,R00558	RC00177,RC00330,RC01044,RC02757	ko00000,ko00001,ko01000,ko03009,ko03029	-	-	-	MMR_HSR1
VLG11_001255	3649.evm.model.supercontig_3.327	3.11e-21	91.3	KOG3430@1|root,KOG3430@2759|Eukaryota,37VQ0@33090|Viridiplantae,3GJWM@35493|Streptophyta	35493|Streptophyta	Z	Dynein light chain	-	-	-	ko:K10418	ko04962,map04962	-	-	-	ko00000,ko00001,ko04812	-	-	-	Dynein_light
VLG11_000108	3760.EMJ11013	1.79e-22	90.5	2E0IQ@1|root,2S7YY@2759|Eukaryota,37WWF@33090|Viridiplantae,3GKY3@35493|Streptophyta,4JR3V@91835|fabids	35493|Streptophyta	-	-	-	-	-	-	-	-	-	-	-	-	-	-	-
VLG11_000105	3712.Bo3g005560.1	2.9e-34	121	COG2036@1|root,KOG1745@2759|Eukaryota,37TRG@33090|Viridiplantae,3GI60@35493|Streptophyta	33090|Viridiplantae	B	histone H3	-	GO:0005575,GO:0005622,GO:0005623,GO:0005634,GO:0005694,GO:0043226,GO:0043227,GO:0043228,GO:0043229,GO:0043231,GO:0043232,GO:0044424,GO:0044464	-	ko:K11253	ko05034,ko05202,ko05322,map05034,map05202,map05322	-	-	-	ko00000,ko00001,ko03036,ko04147	-	-	-	Histone
VLG11_001454	3750.XP_008392990.1	3.52e-31	129	COG4886@1|root,2QPYS@2759|Eukaryota,37Q18@33090|Viridiplantae,3GCT9@35493|Streptophyta,4JJB6@91835|fabids	35493|Streptophyta	T	Belongs to the protein kinase superfamily. Ser Thr protein kinase family	-	GO:0000003,GO:0003006,GO:0007275,GO:0008150,GO:0009790,GO:0009791,GO:0009793,GO:0009888,GO:0010065,GO:0010067,GO:0010087,GO:0010154,GO:0022414,GO:0032501,GO:0032502,GO:0048316,GO:0048507,GO:0048508,GO:0048608,GO:0048731,GO:0048856,GO:0061458	2.7.11.1	ko:K04730	ko04010,ko04064,ko04620,ko04624,ko04722,ko05133,ko05140,ko05142,ko05145,ko05152,ko05162,ko05169,map04010,map04064,map04620,map04624,map04722,map05133,map05140,map05142,map05145,map05152,map05162,map05169	M00686	-	-	ko00000,ko00001,ko00002,ko01000,ko01001	-	-	-	LRRNT_2,LRR_1,LRR_8,Pkinase,Pkinase_Tyr
VLG11_000129	3641.EOY23898	3.22e-92	273	2C4CF@1|root,2RXG7@2759|Eukaryota,37UP2@33090|Viridiplantae,3GI3X@35493|Streptophyta	35493|Streptophyta	S	Protein of unknown function, DUF538	-	-	-	-	-	-	-	-	-	-	-	-	DUF538
VLG11_001400	102107.XP_008233799.1	2.5e-109	322	KOG2824@1|root,KOG2824@2759|Eukaryota,37U4K@33090|Viridiplantae,3GGM7@35493|Streptophyta,4JPBT@91835|fabids	35493|Streptophyta	O	At5g39865-like	-	GO:0005575,GO:0005623,GO:0005886,GO:0016020,GO:0044464,GO:0071944	-	ko:K17479	-	-	-	-	ko00000,ko01009,ko03110	-	-	-	Glutaredoxin
VLG11_001410	3847.GLYMA02G42543.1	4.35e-30	110	KOG1858@1|root,KOG1858@2759|Eukaryota,37JDT@33090|Viridiplantae,3G76K@35493|Streptophyta,4JNFI@91835|fabids	35493|Streptophyta	DO	Anaphase-promoting complex subunit	-	GO:0000003,GO:0003006,GO:0007275,GO:0008150,GO:0009553,GO:0009790,GO:0009791,GO:0009793,GO:0009908,GO:0010154,GO:0010252,GO:0022414,GO:0032501,GO:0032502,GO:0035670,GO:0042592,GO:0048229,GO:0048316,GO:0048367,GO:0048437,GO:0048438,GO:0048440,GO:0048467,GO:0048481,GO:0048608,GO:0048731,GO:0048827,GO:0048856,GO:0048878,GO:0061458,GO:0065007,GO:0065008,GO:0090567,GO:0099402	-	ko:K03348	ko04110,ko04111,ko04113,ko04114,ko04120,ko04914,ko05166,map04110,map04111,map04113,map04114,map04120,map04914,map05166	M00389	-	-	ko00000,ko00001,ko00002,ko03036,ko04121	-	-	-	ANAPC1,PC_rep
VLG11_001891	981085.XP_010106106.1	7.53e-20	91.3	28PKI@1|root,2QWGV@2759|Eukaryota,37PIR@33090|Viridiplantae,3GHEZ@35493|Streptophyta,4JP9P@91835|fabids	35493|Streptophyta	-	-	-	-	-	-	-	-	-	-	-	-	-	-	-
VLG11_000574	225117.XP_009363817.1	1.26e-43	152	COG0605@1|root,KOG0876@2759|Eukaryota,37MWT@33090|Viridiplantae,3G7A0@35493|Streptophyta,4JDW2@91835|fabids	35493|Streptophyta	P	Destroys radicals which are normally produced within the cells and which are toxic to biological systems	-	GO:0000302,GO:0000303,GO:0000305,GO:0001101,GO:0003674,GO:0003824,GO:0004784,GO:0005488,GO:0005575,GO:0005622,GO:0005623,GO:0005737,GO:0005739,GO:0005759,GO:0006801,GO:0006950,GO:0006970,GO:0006979,GO:0008150,GO:0008152,GO:0009410,GO:0009628,GO:0009635,GO:0009636,GO:0009719,GO:0009725,GO:0009737,GO:0009987,GO:0010033,GO:0010035,GO:0016043,GO:0016209,GO:0016491,GO:0016721,GO:0019430,GO:0022607,GO:…	1.15.1.1	ko:K04564	ko04013,ko04068,ko04146,ko04211,ko04212,ko04213,ko05016,map04013,map04068,map04146,map04211,map04212,map04213,map05016	-	-	-	ko00000,ko00001,ko01000	-	-	-	Sod_Fe_C,Sod_Fe_N
VLG11_001433	3750.XP_008370142.1	2.04e-20	99.8	COG4886@1|root,2QPYS@2759|Eukaryota,37Q18@33090|Viridiplantae,3GCT9@35493|Streptophyta,4JFJ8@91835|fabids	35493|Streptophyta	T	LRR receptor-like serine threonine-protein kinase	-	-	2.7.11.1	ko:K04730	ko04010,ko04064,ko04620,ko04624,ko04722,ko05133,ko05140,ko05142,ko05145,ko05152,ko05162,ko05169,map04010,map04064,map04620,map04624,map04722,map05133,map05140,map05142,map05145,map05152,map05162,map05169	M00686	-	-	ko00000,ko00001,ko00002,ko01000,ko01001	-	-	-	LRRNT_2,LRR_1,LRR_6,LRR_8,Pkinase,Pkinase_Tyr
VLG11_001820	3760.EMJ20681	2.85e-253	710	COG0318@1|root,KOG1176@2759|Eukaryota,37J5V@33090|Viridiplantae,3G8HR@35493|Streptophyta,4JGB5@91835|fabids	35493|Streptophyta	I	4-coumarate--CoA ligase-like	-	GO:0005575,GO:0005622,GO:0005623,GO:0005737,GO:0005777,GO:0006082,GO:0006950,GO:0008150,GO:0008152,GO:0009058,GO:0009611,GO:0009694,GO:0009695,GO:0009987,GO:0010817,GO:0016053,GO:0019752,GO:0032787,GO:0042445,GO:0042446,GO:0042579,GO:0043226,GO:0043227,GO:0043229,GO:0043231,GO:0043436,GO:0044237,GO:0044249,GO:0044281,GO:0044283,GO:0044424,GO:0044444,GO:0044464,GO:0046394,GO:0050896,GO:0065007,GO:…	-	ko:K10526	ko00592,ko01100,ko01110,map00592,map01100,map01110	M00113	R07887	RC00014	ko00000,ko00001,ko00002,ko01000	-	-	-	AMP-binding,AMP-binding_C
VLG11_000970	3694.POPTR_0013s07930.1	1.99e-13	72.4	KOG4181@1|root,KOG4181@2759|Eukaryota,37Q2F@33090|Viridiplantae,3GG1N@35493|Streptophyta,4JGR2@91835|fabids	35493|Streptophyta	S	nuclear-transcribed mRNA catabolic process, nonsense-mediated decay	-	-	-	ko:K18735	-	-	-	-	ko00000,ko03019	-	-	-	MMR_HSR1
VLG11_000908	981085.XP_010108475.1	1.1e-23	103	2CMZ8@1|root,2QSW7@2759|Eukaryota,37R4K@33090|Viridiplantae,3GFJJ@35493|Streptophyta,4JSJJ@91835|fabids	35493|Streptophyta	K	Myb-like DNA-binding domain	-	-	-	ko:K11111	-	M00424	-	-	ko00000,ko00002,ko03032	-	-	-	DAO,Myb_DNA-binding
VLG11_000094	3750.XP_008351303.1	1.02e-18	84.7	KOG2477@1|root,KOG2477@2759|Eukaryota,37S6T@33090|Viridiplantae,3GF0J@35493|Streptophyta,4JD3I@91835|fabids	35493|Streptophyta	S	CWF19-like protein 2	-	-	-	-	-	-	-	-	-	-	-	-	CwfJ_C_1,CwfJ_C_2
VLG11_001377	3760.EMJ19198	5.04e-39	145	COG0814@1|root,KOG1305@2759|Eukaryota,37I6M@33090|Viridiplantae,3G81C@35493|Streptophyta,4JID5@91835|fabids	35493|Streptophyta	E	Amino acid transporter	-	-	-	ko:K14993	-	-	-	-	ko00000,ko02000	2.A.18.6	-	-	Aa_trans
VLG12_000856	981085.XP_010090264.1	1.37e-172	488	COG0698@1|root,2QS8W@2759|Eukaryota,37QE0@33090|Viridiplantae,3GAXS@35493|Streptophyta,4JNCE@91835|fabids	35493|Streptophyta	G	DNA-damage-repair toleration protein	-	GO:0005575,GO:0005622,GO:0005623,GO:0005634,GO:0005737,GO:0005829,GO:0006950,GO:0008150,GO:0009266,GO:0009409,GO:0009628,GO:0043226,GO:0043227,GO:0043229,GO:0043231,GO:0044424,GO:0044444,GO:0044464,GO:0050896	-	-	-	-	-	-	-	-	-	-	Cupin_2,Cupin_7,LacAB_rpiB
VLG12_000846	29760.VIT_13s0047g01230.t01	7.94e-179	514	KOG1192@1|root,KOG1192@2759|Eukaryota,37R3V@33090|Viridiplantae,3GE8W@35493|Streptophyta	35493|Streptophyta	CG	Belongs to the UDP-glycosyltransferase family	-	-	2.4.1.330	ko:K21354	-	-	-	-	ko00000,ko01000	-	GT1	-	UDPGT
VLG12_000807	102107.XP_008246519.1	1.01e-26	108	KOG4599@1|root,KOG4599@2759|Eukaryota,37IXN@33090|Viridiplantae,3G9WH@35493|Streptophyta,4JGWC@91835|fabids	35493|Streptophyta	J	Mog1 PsbP DUF1795-like photosystem II reaction center PsbP family protein	-	-	-	-	-	-	-	-	-	-	-	-	PsbP
VLG12_002195	3847.GLYMA14G35620.1	2.99e-23	102	KOG0800@1|root,KOG0800@2759|Eukaryota,37N1U@33090|Viridiplantae,3GGCU@35493|Streptophyta,4JNQ1@91835|fabids	35493|Streptophyta	O	RING-H2 finger protein	-	GO:0003674,GO:0003824,GO:0004842,GO:0006464,GO:0006508,GO:0006511,GO:0006807,GO:0006950,GO:0006952,GO:0008150,GO:0008152,GO:0009056,GO:0009057,GO:0009605,GO:0009607,GO:0009620,GO:0009987,GO:0010033,GO:0010200,GO:0010243,GO:0010498,GO:0016567,GO:0016740,GO:0019538,GO:0019787,GO:0019941,GO:0030163,GO:0032446,GO:0036211,GO:0042221,GO:0042493,GO:0043161,GO:0043170,GO:0043207,GO:0043412,GO:0043632,GO:…	2.3.2.27	ko:K10664	-	-	-	-	ko00000,ko01000,ko04121	-	-	-	zf-RING_2
VLG12_001315	981085.XP_010087366.1	0	967	COG0515@1|root,2QQEW@2759|Eukaryota,37HW6@33090|Viridiplantae,3G7JQ@35493|Streptophyta,4JRYI@91835|fabids	35493|Streptophyta	T	G-type lectin S-receptor-like serine threonine-protein kinase	-	GO:0003674,GO:0003824,GO:0004672,GO:0004674,GO:0005488,GO:0005515,GO:0005516,GO:0005575,GO:0005623,GO:0005886,GO:0006464,GO:0006468,GO:0006793,GO:0006796,GO:0006807,GO:0008150,GO:0008152,GO:0009987,GO:0016020,GO:0016301,GO:0016310,GO:0016740,GO:0016772,GO:0016773,GO:0019538,GO:0036211,GO:0043170,GO:0043412,GO:0044237,GO:0044238,GO:0044260,GO:0044267,GO:0044464,GO:0071704,GO:0071944,GO:0140096,GO:…	-	-	-	-	-	-	-	-	-	-	B_lectin,PAN_2,Pkinase
VLG12_001308	225117.XP_009364698.1	4.06e-27	115	COG0397@1|root,KOG2542@2759|Eukaryota,37N0Z@33090|Viridiplantae,3GBP2@35493|Streptophyta,4JH2U@91835|fabids	35493|Streptophyta	H	Selenoprotein	-	-	-	-	-	-	-	-	-	-	-	-	UPF0061
VLG12_001735	40149.OMERI03G11870.1	4.6e-28	113	2F16S@1|root,2T28C@2759|Eukaryota	2759|Eukaryota	-	-	-	-	-	-	-	-	-	-	-	-	-	-	-
VLG12_000875	29730.Gorai.009G339300.1	3.29e-44	154	COG3424@1|root,2QRSY@2759|Eukaryota,37MT6@33090|Viridiplantae,3G7AK@35493|Streptophyta	35493|Streptophyta	H	Belongs to the chalcone stilbene synthases family	CHS3	GO:0003674,GO:0003824,GO:0008150,GO:0008152,GO:0009058,GO:0009812,GO:0009813,GO:0016210,GO:0016740,GO:0016746,GO:0016747,GO:0071704,GO:1901576	2.3.1.74	ko:K00660	ko00941,ko01100,ko01110,ko04712,map00941,map01100,map01110,map04712	M00137	R01613,R06568,R07987,R07988,R07989	RC00004,RC02726	ko00000,ko00001,ko00002,ko01000,ko01008	-	-	-	Chal_sti_synt_C,Chal_sti_synt_N
VLG12_002288	3847.GLYMA03G06460.1	3.6e-16	79.3	KOG3160@1|root,KOG3160@2759|Eukaryota,37TFF@33090|Viridiplantae,3GF0I@35493|Streptophyta,4JEJK@91835|fabids	35493|Streptophyta	O	Gamma-interferon-inducible lysosomal thiol	-	-	-	ko:K08059	ko04612,map04612	-	-	-	ko00000,ko00001	-	-	-	GILT
VLG12_000090	981085.XP_010099444.1	0	1017	KOG2344@1|root,KOG2344@2759|Eukaryota,37I3J@33090|Viridiplantae,3GD6Y@35493|Streptophyta,4JMWT@91835|fabids	35493|Streptophyta	U	Exocyst subunit exo70 family protein	-	GO:0000145,GO:0001101,GO:0002237,GO:0002238,GO:0002831,GO:0002833,GO:0003674,GO:0005488,GO:0005515,GO:0005575,GO:0005576,GO:0005615,GO:0005622,GO:0005623,GO:0005634,GO:0005737,GO:0005829,GO:0005886,GO:0005938,GO:0006810,GO:0006887,GO:0006950,GO:0006952,GO:0008150,GO:0009414,GO:0009415,GO:0009605,GO:0009607,GO:0009617,GO:0009620,GO:0009628,GO:0009787,GO:0009789,GO:0009966,GO:0009967,GO:0009987,GO:…	-	ko:K07195	ko04910,map04910	-	-	-	ko00000,ko00001,ko03036,ko04131	-	-	-	Exo70
VLG12_002269	3760.EMJ09792	1.81e-233	658	28IKX@1|root,2QQXS@2759|Eukaryota,37JAG@33090|Viridiplantae,3GE75@35493|Streptophyta,4JTCA@91835|fabids	35493|Streptophyta	S	Methyltransferase FkbM domain	-	-	-	-	-	-	-	-	-	-	-	-	Methyltransf_11,Methyltransf_21
VLG12_002256	3649.evm.model.supercontig_2.327	7.67e-36	129	2CRCK@1|root,2R7NZ@2759|Eukaryota,3880H@33090|Viridiplantae,3GEH1@35493|Streptophyta,3HVY5@3699|Brassicales	35493|Streptophyta	S	lob domain-containing protein	-	GO:0005575,GO:0016020	-	-	-	-	-	-	-	-	-	-	LOB
VLG12_000592	981085.XP_010093007.1	2.32e-13	75.9	2CXUA@1|root,2RZTI@2759|Eukaryota,37UXA@33090|Viridiplantae,3GIU5@35493|Streptophyta,4JPI1@91835|fabids	35493|Streptophyta	K	Zinc finger protein CONSTANS-like	-	GO:0003674,GO:0003700,GO:0005488,GO:0005515,GO:0005575,GO:0005622,GO:0005623,GO:0005634,GO:0006355,GO:0008150,GO:0009314,GO:0009416,GO:0009628,GO:0009889,GO:0009909,GO:0010468,GO:0010556,GO:0019219,GO:0019222,GO:0031323,GO:0031326,GO:0042802,GO:0043226,GO:0043227,GO:0043229,GO:0043231,GO:0044424,GO:0044464,GO:0048580,GO:0048831,GO:0050789,GO:0050793,GO:0050794,GO:0050896,GO:0051171,GO:0051239,GO:…	-	-	-	-	-	-	-	-	-	-	CCT
VLG12_000106	3760.EMJ07354	4.13e-42	144	2CTTZ@1|root,2S6CF@2759|Eukaryota,37W67@33090|Viridiplantae,3GKAB@35493|Streptophyta,4JUYT@91835|fabids	35493|Streptophyta	T	Non-specific lipid-transfer protein 1-like	-	-	-	-	-	-	-	-	-	-	-	-	Tryp_alpha_amyl
VLG12_000105	225117.XP_009374383.1	3.47e-67	231	2CMZ8@1|root,2QSW7@2759|Eukaryota,37R4K@33090|Viridiplantae,3GFJJ@35493|Streptophyta,4JTPX@91835|fabids	35493|Streptophyta	K	SANT SWI3, ADA2, N-CoR and TFIIIB'' DNA-binding domains	-	-	-	ko:K11111	-	M00424	-	-	ko00000,ko00002,ko03032	-	-	-	DAO,Myb_DNA-binding
VLG12_000551	81985.XP_006291270.1	2.34e-38	139	KOG1334@1|root,KOG1334@2759|Eukaryota,37KS6@33090|Viridiplantae,3G9QM@35493|Streptophyta,3HN4A@3699|Brassicales	35493|Streptophyta	S	WD40 repeats	-	GO:0000151,GO:0005575,GO:0005622,GO:0005623,GO:0005634,GO:0005654,GO:0005737,GO:0005739,GO:0005829,GO:0006464,GO:0006807,GO:0008150,GO:0008152,GO:0009987,GO:0019538,GO:0031461,GO:0031974,GO:0031981,GO:0032991,GO:0036211,GO:0043170,GO:0043226,GO:0043227,GO:0043229,GO:0043231,GO:0043233,GO:0043412,GO:0043687,GO:0044237,GO:0044238,GO:0044260,GO:0044267,GO:0044422,GO:0044424,GO:0044428,GO:0044444,GO:…	-	ko:K11804	-	-	-	-	ko00000,ko04121	-	-	-	WD40
VLG12_001879	57918.XP_004296276.1	1.99e-231	650	COG2335@1|root,KOG1437@2759|Eukaryota,37P41@33090|Viridiplantae,3GEMN@35493|Streptophyta,4JTD0@91835|fabids	35493|Streptophyta	MW	Fasciclin-like arabinogalactan protein	-	-	-	-	-	-	-	-	-	-	-	-	Fasciclin
VLG12_000534	3694.POPTR_0006s13140.1	1.64e-24	100	28IZK@1|root,2QV9E@2759|Eukaryota,37QQC@33090|Viridiplantae,3GE84@35493|Streptophyta,4JRSB@91835|fabids	35493|Streptophyta	K	NAC transcription factor	-	GO:0000003,GO:0003006,GO:0003674,GO:0003700,GO:0005575,GO:0005622,GO:0005623,GO:0005634,GO:0006355,GO:0007275,GO:0007568,GO:0008150,GO:0009790,GO:0009791,GO:0009793,GO:0009825,GO:0009835,GO:0009889,GO:0009908,GO:0009987,GO:0010150,GO:0010154,GO:0010468,GO:0010556,GO:0016049,GO:0019219,GO:0019222,GO:0021700,GO:0022414,GO:0031323,GO:0031326,GO:0032501,GO:0032502,GO:0040007,GO:0043226,GO:0043227,GO:…	-	-	-	-	-	-	-	-	-	-	NAM
VLG12_001860	4098.XP_009623632.1	3.79e-40	139	2E09R@1|root,2S7QS@2759|Eukaryota,37X99@33090|Viridiplantae,3GM6F@35493|Streptophyta,44M00@71274|asterids	35493|Streptophyta	S	Plant self-incompatibility protein S1	-	-	-	-	-	-	-	-	-	-	-	-	Self-incomp_S1
VLG12_001921	981085.XP_010104672.1	0	912	COG2124@1|root,KOG0157@2759|Eukaryota,37QBG@33090|Viridiplantae,3GAGT@35493|Streptophyta,4JMHT@91835|fabids	35493|Streptophyta	Q	Cytochrome p450	-	GO:0003674,GO:0003824,GO:0004497,GO:0005575,GO:0005622,GO:0005623,GO:0005737,GO:0005773,GO:0006082,GO:0006629,GO:0006631,GO:0006725,GO:0008150,GO:0008152,GO:0009058,GO:0009698,GO:0009699,GO:0009987,GO:0010345,GO:0016491,GO:0016705,GO:0016713,GO:0018685,GO:0019438,GO:0019748,GO:0019752,GO:0032787,GO:0043226,GO:0043227,GO:0043229,GO:0043231,GO:0043436,GO:0044237,GO:0044238,GO:0044249,GO:0044255,GO:…	-	ko:K15401	ko00073,map00073	-	R09452	RC00797	ko00000,ko00001,ko00199,ko01000	-	-	-	p450
VLG12_000272	57918.XP_004309577.1	4.17e-34	133	2CN8B@1|root,2QUGT@2759|Eukaryota,37QXW@33090|Viridiplantae,3G9QK@35493|Streptophyta,4JJZD@91835|fabids	35493|Streptophyta	S	Root cap	-	-	-	-	-	-	-	-	-	-	-	-	Root_cap
VLG12_001583	102107.XP_008246460.1	5.21e-189	543	28MUF@1|root,2QUCP@2759|Eukaryota,37R26@33090|Viridiplantae,3GGK2@35493|Streptophyta,4JI4Z@91835|fabids	35493|Streptophyta	S	Protein AUXIN RESPONSE	-	GO:0005575,GO:0005622,GO:0005623,GO:0005737,GO:0005739,GO:0005773,GO:0005774,GO:0005783,GO:0006810,GO:0008150,GO:0009605,GO:0009612,GO:0009628,GO:0009719,GO:0009725,GO:0009733,GO:0009914,GO:0009926,GO:0010033,GO:0010817,GO:0012505,GO:0016020,GO:0031090,GO:0042221,GO:0043226,GO:0043227,GO:0043229,GO:0043231,GO:0044422,GO:0044424,GO:0044437,GO:0044444,GO:0044446,GO:0044464,GO:0050896,GO:0051179,GO:…	-	-	-	-	-	-	-	-	-	-	Abhydrolase_1,Abhydrolase_6
VLG12_000247	29730.Gorai.007G365900.1	1.99e-71	246	KOG4658@1|root,KOG4658@2759|Eukaryota,37JN7@33090|Viridiplantae,3GAV6@35493|Streptophyta	35493|Streptophyta	T	Belongs to the disease resistance NB-LRR family	-	-	-	ko:K19613	ko04014,map04014	-	-	-	ko00000,ko00001	-	-	-	LRR_8,NB-ARC
VLG12_000666	3983.cassava4.1_022858m	4.63e-300	840	COG0515@1|root,2QSJ4@2759|Eukaryota,37JWA@33090|Viridiplantae,3GAQ6@35493|Streptophyta,4JKTU@91835|fabids	35493|Streptophyta	T	L-type lectin-domain containing receptor kinase	-	-	2.7.11.1	ko:K04730	ko04010,ko04064,ko04620,ko04624,ko04722,ko05133,ko05140,ko05142,ko05145,ko05152,ko05162,ko05169,map04010,map04064,map04620,map04624,map04722,map05133,map05140,map05142,map05145,map05152,map05162,map05169	M00686	-	-	ko00000,ko00001,ko00002,ko01000,ko01001	-	-	-	Lectin_legB,Pkinase
VLG12_000661	3750.XP_008350441.1	3.3e-37	136	COG0515@1|root,2QSJ4@2759|Eukaryota,37JWA@33090|Viridiplantae,3GAQ6@35493|Streptophyta,4JKTU@91835|fabids	35493|Streptophyta	T	L-type lectin-domain containing receptor kinase	-	GO:0001101,GO:0005575,GO:0005623,GO:0005886,GO:0006950,GO:0006952,GO:0007275,GO:0008150,GO:0009555,GO:0009605,GO:0009607,GO:0009617,GO:0009719,GO:0009725,GO:0009751,GO:0010033,GO:0014070,GO:0016020,GO:0032501,GO:0032502,GO:0042221,GO:0042493,GO:0042742,GO:0043207,GO:0044464,GO:0046677,GO:0048229,GO:0048856,GO:0050896,GO:0051704,GO:0051707,GO:0071944,GO:0098542,GO:1901700	-	-	-	-	-	-	-	-	-	-	Lectin_legB,Pkinase,Pkinase_Tyr
VLG12_001502	42345.XP_008788894.1	8.56e-27	114	COG2801@1|root,KOG0017@2759|Eukaryota,37RIF@33090|Viridiplantae,3G9AM@35493|Streptophyta,3M33Z@4447|Liliopsida	35493|Streptophyta	L	source UniProtKB	-	-	-	-	-	-	-	-	-	-	-	-	RVT_2,Retrotran_gag_2,gag_pre-integrs,rve
VLG12_000638	102107.XP_008222454.1	2.9e-17	83.6	2CMT8@1|root,2QRUP@2759|Eukaryota,37P9B@33090|Viridiplantae,3GDXZ@35493|Streptophyta,4JEU0@91835|fabids	35493|Streptophyta	S	PGR5-like protein	-	-	-	-	-	-	-	-	-	-	-	-	-
VLG12_000706	3641.EOY33150	1.97e-15	80.1	COG0543@1|root,KOG0534@2759|Eukaryota,37NCB@33090|Viridiplantae,3G8G7@35493|Streptophyta	35493|Streptophyta	CH	belongs to the flavoprotein pyridine nucleotide cytochrome reductase family	-	GO:0003674,GO:0003824,GO:0004128,GO:0005575,GO:0005618,GO:0005622,GO:0005623,GO:0005737,GO:0005783,GO:0005886,GO:0006091,GO:0008150,GO:0008152,GO:0009505,GO:0009987,GO:0012505,GO:0016020,GO:0016491,GO:0016651,GO:0016653,GO:0022900,GO:0030312,GO:0043226,GO:0043227,GO:0043229,GO:0043231,GO:0044237,GO:0044424,GO:0044444,GO:0044464,GO:0055114,GO:0071944	1.6.2.2	ko:K00326	ko00520,map00520	-	R00100	-	ko00000,ko00001,ko01000	-	-	-	FAD_binding_6,NAD_binding_1
VLG12_002035	3983.cassava4.1_026966m	6.81e-24	95.9	COG0515@1|root,KOG0192@2759|Eukaryota,37JRZ@33090|Viridiplantae,3GFGZ@35493|Streptophyta,4JSSA@91835|fabids	35493|Streptophyta	T	PB1 domain	-	-	2.7.11.25	ko:K04422	ko04010,map04010	-	-	-	ko00000,ko00001,ko01000,ko01001	-	-	-	PB1,Pkinase_Tyr
VLG12_001176	3847.GLYMA13G01250.1	1.58e-112	329	COG2340@1|root,KOG3017@2759|Eukaryota,37Q7J@33090|Viridiplantae,3GBNN@35493|Streptophyta,4JID4@91835|fabids	35493|Streptophyta	S	Belongs to the CRISP family	-	-	-	-	-	-	-	-	-	-	-	-	CAP
VLG12_001248	3656.XP_008453543.1	6.68e-95	281	KOG3356@1|root,KOG3356@2759|Eukaryota,37TRW@33090|Viridiplantae,3GHZU@35493|Streptophyta,4JP1N@91835|fabids	35493|Streptophyta	S	Oligosaccharyltransferase complex subunit	-	-	-	-	-	-	-	-	-	-	-	-	OST3_OST6
VLG12_001201	3983.cassava4.1_029397m	3.28e-54	181	2BPNP@1|root,2S1SD@2759|Eukaryota,37VPS@33090|Viridiplantae,3GJU3@35493|Streptophyta,4JQGP@91835|fabids	35493|Streptophyta	-	-	-	-	-	-	-	-	-	-	-	-	-	-	-
VLG12_001670	3847.GLYMA07G32050.1	7.61e-83	248	COG0071@1|root,KOG0710@2759|Eukaryota,37TQV@33090|Viridiplantae,3GIA6@35493|Streptophyta,4JVRG@91835|fabids	35493|Streptophyta	O	Belongs to the small heat shock protein (HSP20) family	-	GO:0005575,GO:0005622,GO:0005623,GO:0005737,GO:0044424,GO:0044464	-	ko:K13993	ko04141,map04141	-	-	-	ko00000,ko00001,ko03110	-	-	-	HSP20
VLG12_001672	102107.XP_008221659.1	1.46e-65	206	KOG3386@1|root,KOG3386@2759|Eukaryota,37VSX@33090|Viridiplantae,3GJRW@35493|Streptophyta,4JQC4@91835|fabids	35493|Streptophyta	P	Copper transporter	-	-	-	ko:K14686	ko01524,ko04978,map01524,map04978	-	-	-	ko00000,ko00001,ko02000	1.A.56.1	-	-	Ctr
VLG12_001668	3827.XP_004505087.1	1.5e-82	248	COG0071@1|root,KOG0710@2759|Eukaryota,37TQV@33090|Viridiplantae,3GHWT@35493|Streptophyta,4JRX3@91835|fabids	35493|Streptophyta	O	Belongs to the small heat shock protein (HSP20) family	-	-	-	ko:K13993	ko04141,map04141	-	-	-	ko00000,ko00001,ko03110	-	-	-	HSP20
VLG12_000321	29760.VIT_04s0044g01530.t01	5.07e-20	91.7	KOG1192@1|root,KOG1192@2759|Eukaryota,37R3V@33090|Viridiplantae,3GE8W@35493|Streptophyta	35493|Streptophyta	CG	Belongs to the UDP-glycosyltransferase family	-	-	2.4.1.330	ko:K21354	-	-	-	-	ko00000,ko01000	-	GT1	-	UDPGT

## Sheet: S1-2 RNA data stat
Table S1-2: Information of transcriptomic data from roots (R), stems (S), and leaves (L) used for the V. leiocarpa genome annotation
1. Quality Control and Statistical Analysis of Raw and Processed Transcriptomic Data
Sample	Raw Data		Valid Data		Valid Ratio(reads)	Q20%	Q30%	GC content%
	Read	Base	Read	Base
L_1_1	42462928	6.37G	40782972	6.12G	96.04	100	99.21	45
L_1_2	39174558	5.88G	37682824	5.65G	96.19	100	99.22	45
L_1_3	36836656	5.53G	35383738	5.31G	96.06	100	99.2	45
R_3_1	37507748	5.63G	35560188	5.33G	94.81	100	99.3	45
R_3_2	37528494	5.63G	35678030	5.35G	95.07	100	99.28	45
R_3_3	35552316	5.33G	33737854	5.06G	94.9	100	99.28	45
S_2_1	45666516	6.85G	43601950	6.54G	95.48	100	99.31	45
S_2_2	45292854	6.79G	42874084	6.43G	94.66	100	99.3	45
S_2_3	35503436	5.33G	33356668	5.00G	93.95	100	99.28	44.5
2.Mapping Statistics of Transcriptomic Reads to the Reference Genome
Sample	Valid reads	Mapped reads	Unique Mapped reads	Multi Mapped reads	PE Mapped reads	Reads map to sense strand	Reads map to antisense strand	Non-splice reads	Splice reads
L_1_1	40782972	39228975(96.19%)	38066723(93.34%)	1162252(2.85%)	37564406(92.11%)	19028675(46.66%)	19038048(46.68%)	22711417(55.69%)	15355306(37.65%)
L_1_2	37682824	36415543(96.64%)	35446178(94.06%)	969365(2.57%)	34867248(92.53%)	17718567(47.02%)	17727611(47.04%)	21121655(56.05%)	14324523(38.01%)
L_1_3	35383738	34111029(96.40%)	33165679(93.73%)	945350(2.67%)	32708184(92.44%)	16578804(46.85%)	16586875(46.88%)	19773504(55.88%)	13392175(37.85%)
R_3_1	35560188	34256369(96.33%)	33428959(94.01%)	827410(2.33%)	32579532(91.62%)	16691096(46.94%)	16737863(47.07%)	21045492(59.18%)	12383467(34.82%)
R_3_2	35678030	34296185(96.13%)	33456860(93.77%)	839325(2.35%)	32759220(91.82%)	16704740(46.82%)	16752120(46.95%)	21008468(58.88%)	12448392(34.89%)
R_3_3	33737854	32720253(96.98%)	31998812(94.85%)	721441(2.14%)	31175296(92.40%)	15979182(47.36%)	16019630(47.48%)	19738112(58.50%)	12260700(36.34%)
S_2_1	43601950	41993505(96.31%)	40966094(93.95%)	1027411(2.36%)	40203120(92.20%)	20475156(46.96%)	20490938(47.00%)	25847286(59.28%)	15118808(34.67%)
S_2_2	42874084	41275959(96.27%)	40264494(93.91%)	1011465(2.36%)	39123938(91.25%)	20122573(46.93%)	20141921(46.98%)	25380244(59.20%)	14884250(34.72%)
S_2_3	33356668	32082920(96.18%)	31205698(93.55%)	877222(2.63%)	30291304(90.81%)	15594948(46.75%)	15610750(46.80%)	19897292(59.65%)	11308406(33.90%)
3. Distribution of Mapped Reads Across Different Genomic Regions
Samples	L_1_1	L_1_2	L_1_3	R_3_1	R_3_2	R_3_3	S_2_1	S_2_2	S_2_3
exon	95.14	95.42	95.16	94.58	95.2	95.72	95.03	94.89	94.64
intron	4.02	3.8	3.99	4.66	4.07	3.65	4.11	4.24	4.41
intergenic	0.84	0.78	0.84	0.76	0.73	0.63	0.86	0.87	0.94
4. Number of Differentially expressed genes (DEGs) identified between different tissue groups (roots, stems, and leaves)
comparation_group	up-regulated DEGs	down-regulated DEGs
LeafVSRoot	4406	5424
LeafVSStem	3020	4390
StemVSRoot	3752	3454

## Sheet: S1-3 DEG enrichment
Table S1-3. GO and KEGG enrichment analysis of differentially expressed genes across different tissues.
ID	Description	Type	GeneRatio	BgRatio	Overlap	contrast	p-value	qvalue	geneID	Odds Ratio
GO:0007623	circadian rhythm	BP	46/3560	78/24793	46/78	Leaf_vs_Root	0.00102668	0.0486063	VLG9_001126;VLG6_001154;VLG9_001437;VLG4_000652;VLG10_001300;VLG6_001946;VLG1_001084;VLG6_000291;VLG8_000678;VLG6_001065;VLG10_001301;VLG3_000907;VLG5_000208;VLG5_002241;VLG2_001370;VLG12_002182;VLG1_000137;VLG7_000045;VLG12_000654;VLG12_000578;VLG9_000932;VLG9_001159;VLG11_000244;VLG12_001503;VLG1_002173;VLG1_001528;VLG12_000672;VLG7_000109;VLG12_000583;VLG1_000597;VLG6_000399;VLG8_000396;VLG6_0…	1.44684
GO:0048511	rhythmic process	BP	46/3560	78/24793	46/78	Leaf_vs_Root	0.00102668	0.0486063	VLG9_001126;VLG6_001154;VLG9_001437;VLG4_000652;VLG10_001300;VLG6_001946;VLG1_001084;VLG6_000291;VLG8_000678;VLG6_001065;VLG10_001301;VLG3_000907;VLG5_000208;VLG5_002241;VLG2_001370;VLG12_002182;VLG1_000137;VLG7_000045;VLG12_000654;VLG12_000578;VLG9_000932;VLG9_001159;VLG11_000244;VLG12_001503;VLG1_002173;VLG1_001528;VLG12_000672;VLG7_000109;VLG12_000583;VLG1_000597;VLG6_000399;VLG8_000396;VLG6_0…	1.44684
GO:0006468	protein phosphorylation	BP	379/3560	816/24793	379/816	Leaf_vs_Root	0.000714155	0.0354595	VLG5_001644;VLG10_001076;VLG8_001597;VLG2_000788;VLG11_001242;VLG9_001213;VLG5_000660;VLG5_000677;VLG1_000537;VLG9_000419;VLG5_000676;VLG9_001159;VLG5_000445;VLG7_001221;VLG10_000923;VLG5_000514;VLG6_001826;VLG5_001656;VLG1_002267;VLG6_001759;VLG12_001313;VLG5_000638;VLG7_001431;VLG11_001760;VLG2_001858;VLG10_000599;VLG5_000181;VLG2_000796;VLG1_001297;VLG1_001558;VLG1_002297;VLG5_001631;VLG3_0016…	1.14269
GO:0010218	response to far red light	BP	28/3560	42/24793	28/42	Leaf_vs_Root	0.000696883	0.0349649	VLG10_000459;VLG6_001367;VLG10_001300;VLG9_000591;VLG1_002064;VLG1_000361;VLG6_000711;VLG10_000675;VLG10_001301;VLG12_001854;VLG8_000575;VLG5_000219;VLG11_000751;VLG8_001717;VLG11_000753;VLG11_001420;VLG2_001466;VLG11_001727;VLG1_000597;VLG10_001758;VLG4_001221;VLG1_000003;VLG12_000134;VLG3_000089;VLG8_002106;VLG11_000825;VLG6_001003;VLG6_001457	1.63687
GO:0016051	carbohydrate biosynthetic process	BP	103/3560	196/24793	103/196	Leaf_vs_Root	0.0006902	0.0349649	VLG6_001789;VLG11_000692;VLG11_001469;VLG7_000520;VLG4_000461;VLG8_000354;VLG8_002084;VLG8_000168;VLG2_001759;VLG1_001423;VLG9_001665;VLG5_002117;VLG1_001492;VLG10_001456;VLG9_000291;VLG2_000867;VLG3_000007;VLG8_000528;VLG12_001488;VLG6_001843;VLG5_000541;VLG10_001624;VLG8_000753;VLG5_002124;VLG1_002317;VLG2_000683;VLG3_000257;VLG4_000223;VLG2_001698;VLG2_001588;VLG8_002333;VLG12_001251;VLG5_0021…	1.28876
GO:0098771	inorganic ion homeostasis	BP	127/3560	248/24793	127/248	Leaf_vs_Root	0.000699899	0.0349649	VLG12_000814;VLG2_000172;VLG2_000141;VLG8_000976;VLG8_000406;VLG12_001228;VLG5_000106;VLG7_000770;VLG10_001673;VLG1_001668;VLG2_000071;VLG12_001273;VLG12_000402;VLG4_000459;VLG8_000742;VLG3_001096;VLG3_000510;VLG7_001230;VLG1_000597;VLG6_000375;VLG11_001169;VLG2_002296;VLG12_000626;VLG2_000133;VLG11_001395;VLG11_000997;VLG3_000089;VLG2_001247;VLG11_001575;VLG3_001516;VLG1_001951;VLG3_000470;VLG2_…	1.25608
GO:0009644	response to high light intensity	BP	40/3560	65/24793	40/65	Leaf_vs_Root	0.000666591	0.0341387	VLG1_001514;VLG10_000459;VLG1_000172;VLG9_000591;VLG2_000326;VLG8_002210;VLG1_000173;VLG2_002085;VLG12_001911;VLG7_000442;VLG2_001400;VLG5_002179;VLG4_001445;VLG5_001289;VLG6_000208;VLG5_002241;VLG8_000196;VLG11_001814;VLG3_000560;VLG6_002015;VLG7_000682;VLG1_001271;VLG11_001727;VLG10_000011;VLG1_001222;VLG1_000597;VLG2_002118;VLG6_000886;VLG10_001746;VLG2_000419;VLG11_000867;VLG8_000331;VLG3_000…	1.51005
GO:0055080	monoatomic cation homeostasis	BP	123/3560	239/24793	123/239	Leaf_vs_Root	0.00065806	0.0339151	VLG12_000814;VLG2_000172;VLG2_000141;VLG8_000976;VLG8_000406;VLG12_001228;VLG5_000106;VLG7_000770;VLG2_000071;VLG12_001273;VLG12_000402;VLG4_000459;VLG8_000742;VLG3_001096;VLG3_000510;VLG7_001230;VLG1_000597;VLG6_000375;VLG5_000234;VLG11_001169;VLG2_002296;VLG12_000626;VLG2_000133;VLG11_001395;VLG11_000997;VLG3_000089;VLG2_001247;VLG11_001575;VLG3_001516;VLG1_001951;VLG3_000470;VLG2_002158;VLG2_0…	1.26231
GO:0010088	phloem development	BP	14/3560	17/24793	14/17	Leaf_vs_Root	0.00061481	0.0322269	VLG4_001586;VLG3_001454;VLG4_001437;VLG4_001436;VLG4_001438;VLG7_001857;VLG9_001490;VLG4_001205;VLG7_001142;VLG4_001435;VLG3_000205;VLG7_001801;VLG3_000936;VLG4_001434	2.021
GO:0015995	chlorophyll biosynthetic process	BP	14/3560	17/24793	14/17	Leaf_vs_Root	0.00061481	0.0322269	VLG1_000515;VLG9_000729;VLG11_000556;VLG12_001662;VLG7_000991;VLG1_002168;VLG3_001044;VLG8_001063;VLG9_001758;VLG9_000033;VLG2_001523;VLG7_000141;VLG5_001505;VLG5_000018	2.021
GO:0033014	tetrapyrrole biosynthetic process	BP	21/3560	29/24793	21/29	Leaf_vs_Root	0.000617389	0.0322269	VLG1_000515;VLG7_000991;VLG3_001044;VLG2_001523;VLG7_000141;VLG7_000770;VLG5_000018;VLG2_001166;VLG8_001063;VLG9_001758;VLG9_000033;VLG8_002124;VLG11_000556;VLG12_001662;VLG1_002168;VLG1_001128;VLG5_001505;VLG11_000567;VLG9_000729;VLG4_000772;VLG12_000936	1.7784
GO:0061640	cytoskeleton-dependent cytokinesis	BP	62/3560	109/24793	62/109	Leaf_vs_Root	0.000586827	0.0312322	VLG8_002156;VLG12_001072;VLG2_000865;VLG10_001471;VLG7_001315;VLG2_000179;VLG2_001194;VLG8_000354;VLG2_000137;VLG1_000807;VLG5_002125;VLG2_000864;VLG12_000351;VLG3_000854;VLG5_002116;VLG2_000868;VLG10_001454;VLG2_001341;VLG8_000035;VLG11_001523;VLG5_002117;VLG6_001270;VLG2_000167;VLG6_002006;VLG4_000145;VLG10_001456;VLG11_001232;VLG3_000373;VLG2_000867;VLG5_000475;VLG11_000922;VLG4_000935;VLG9_00…	1.39505
GO:0000910	cytokinesis	BP	63/3560	111/24793	63/111	Leaf_vs_Root	0.000575996	0.0308575	VLG8_002156;VLG12_001072;VLG2_000865;VLG10_001471;VLG7_001315;VLG2_000179;VLG2_001194;VLG8_000354;VLG2_000137;VLG1_000807;VLG5_002125;VLG2_000864;VLG12_000351;VLG3_000854;VLG5_002116;VLG2_000868;VLG10_001454;VLG2_001341;VLG8_000035;VLG11_001523;VLG5_002117;VLG6_001270;VLG2_000167;VLG6_002006;VLG4_000145;VLG10_001456;VLG11_001232;VLG3_000373;VLG2_000867;VLG5_000475;VLG11_000922;VLG4_000935;VLG9_00…	1.392
GO:0010073	meristem maintenance	BP	115/3560	221/24793	115/221	Leaf_vs_Root	0.000569485	0.0307107	VLG10_001493;VLG4_000395;VLG9_000198;VLG2_000788;VLG4_001358;VLG4_000959;VLG10_001673;VLG9_000194;VLG7_000379;VLG9_000419;VLG9_000212;VLG3_000230;VLG1_000597;VLG4_001002;VLG7_001558;VLG4_000966;VLG8_001003;VLG6_001468;VLG11_000386;VLG11_001616;VLG10_001496;VLG9_000209;VLG3_000237;VLG10_001495;VLG6_000316;VLG6_001153;VLG11_000368;VLG8_001390;VLG1_001857;VLG2_000770;VLG11_000369;VLG2_000796;VLG3_00…	1.27632
GO:0010109	regulation of photosynthesis	BP	25/3560	36/24793	25/36	Leaf_vs_Root	0.000528975	0.028909	VLG1_000172;VLG4_000652;VLG1_000699;VLG11_000947;VLG1_000173;VLG2_001625;VLG3_000111;VLG5_002179;VLG4_001445;VLG5_001289;VLG4_000426;VLG1_001272;VLG6_001070;VLG1_001492;VLG1_001222;VLG11_000784;VLG2_000923;VLG8_002353;VLG1_000661;VLG10_001746;VLG11_000849;VLG8_000331;VLG7_001969;VLG5_001699;VLG10_000690	1.70513
GO:0006694	steroid biosynthetic process	BP	32/3560	49/24793	32/49	Leaf_vs_Root	0.000513384	0.0282465	VLG10_001110;VLG8_001919;VLG2_000339;VLG3_000189;VLG12_001683;VLG1_000308;VLG2_000676;VLG2_001899;VLG3_000190;VLG4_000669;VLG3_001167;VLG6_000593;VLG4_000801;VLG5_000042;VLG1_001491;VLG1_001101;VLG3_001320;VLG8_000908;VLG8_000909;VLG8_000907;VLG12_001697;VLG6_000548;VLG2_002144;VLG7_000957;VLG1_001254;VLG10_000286;VLG8_001918;VLG6_001856;VLG10_000411;VLG1_001599;VLG6_000697;VLG3_001631	1.603
GO:0030243	cellulose metabolic process	BP	32/3560	49/24793	32/49	Leaf_vs_Root	0.000513384	0.0282465	VLG2_000865;VLG7_000023;VLG3_000209;VLG7_000520;VLG8_000354;VLG5_002125;VLG2_000864;VLG3_000854;VLG2_000868;VLG10_001454;VLG9_001665;VLG8_000035;VLG5_002117;VLG6_002006;VLG10_001456;VLG2_000867;VLG5_000475;VLG1_001723;VLG8_000036;VLG10_001455;VLG1_000282;VLG5_002118;VLG3_000855;VLG10_001457;VLG5_002124;VLG5_002119;VLG5_002115;VLG2_000866;VLG1_002317;VLG5_002120;VLG8_001429;VLG5_002116	1.603
GO:0006833	water transport	BP	57/3560	98/24793	57/98	Leaf_vs_Root	0.000447807	0.0251482	VLG7_001466;VLG7_001163;VLG2_000128;VLG7_001740;VLG2_002287;VLG7_001055;VLG2_000172;VLG11_000337;VLG2_000141;VLG1_002203;VLG12_000603;VLG2_000161;VLG12_002342;VLG5_000508;VLG7_001694;VLG2_000156;VLG2_002286;VLG2_001016;VLG2_000070;VLG2_000148;VLG2_000168;VLG1_001947;VLG2_000074;VLG2_000071;VLG11_001257;VLG7_001343;VLG11_000250;VLG2_002161;VLG2_000134;VLG7_000591;VLG7_000592;VLG2_002296;VLG2_00215…	1.42663
GO:0042044	fluid transport	BP	57/3560	98/24793	57/98	Leaf_vs_Root	0.000447807	0.0251482	VLG7_001466;VLG7_001163;VLG2_000128;VLG7_001740;VLG2_002287;VLG7_001055;VLG2_000172;VLG11_000337;VLG2_000141;VLG1_002203;VLG12_000603;VLG2_000161;VLG12_002342;VLG5_000508;VLG7_001694;VLG2_000156;VLG2_002286;VLG2_001016;VLG2_000070;VLG2_000148;VLG2_000168;VLG1_001947;VLG2_000074;VLG2_000071;VLG11_001257;VLG7_001343;VLG11_000250;VLG2_002161;VLG2_000134;VLG7_000591;VLG7_000592;VLG2_002296;VLG2_00215…	1.42663
GO:0000281	mitotic cytokinesis	BP	61/3560	106/24793	61/106	Leaf_vs_Root	0.00042587	0.0244216	VLG8_002156;VLG12_001072;VLG2_000865;VLG10_001471;VLG7_001315;VLG2_000179;VLG2_001194;VLG8_000354;VLG2_000137;VLG1_000807;VLG5_002125;VLG2_000864;VLG12_000351;VLG3_000854;VLG5_002116;VLG2_000868;VLG10_001454;VLG2_001341;VLG8_000035;VLG11_001523;VLG5_002117;VLG6_001270;VLG2_000167;VLG6_002006;VLG4_000145;VLG10_001456;VLG11_001232;VLG3_000373;VLG2_000867;VLG5_000475;VLG11_000922;VLG4_000935;VLG9_00…	1.41146
GO:0006979	response to oxidative stress	BP	186/3560	374/24793	186/374	Leaf_vs_Root	0.000352105	0.02048	VLG1_001514;VLG1_000515;VLG7_001180;VLG1_001232;VLG7_000854;VLG12_002246;VLG3_000416;VLG10_000241;VLG7_001703;VLG8_000639;VLG7_001330;VLG3_000923;VLG10_000917;VLG3_000414;VLG1_001531;VLG5_001593;VLG3_000833;VLG10_001848;VLG6_001237;VLG11_000313;VLG6_000277;VLG8_000042;VLG7_000682;VLG7_001186;VLG5_001592;VLG3_001424;VLG10_000231;VLG5_000407;VLG1_000597;VLG7_000127;VLG1_000450;VLG7_001558;VLG10_000…	1.22104
GO:0046677	response to antibiotic	BP	155/3560	305/24793	155/305	Leaf_vs_Root	0.000306418	0.0182129	VLG1_001514;VLG7_000854;VLG1_001232;VLG9_001356;VLG3_000416;VLG8_000830;VLG11_000207;VLG8_000639;VLG3_000923;VLG2_001610;VLG3_000414;VLG4_001177;VLG11_000753;VLG11_000203;VLG6_001237;VLG11_000313;VLG7_000682;VLG5_001133;VLG10_000231;VLG7_001186;VLG11_000195;VLG3_000510;VLG1_000450;VLG11_000198;VLG5_000209;VLG3_000040;VLG7_001558;VLG1_000003;VLG3_001484;VLG11_001381;VLG7_000855;VLG6_002043;VLG1_00…	1.24729
GO:0046283	anthocyanin-containing compound metabolic process	BP	44/3560	71/24793	44/71	Leaf_vs_Root	0.000291983	0.017612	VLG12_001385;VLG10_001696;VLG7_001510;VLG2_001274;VLG7_001498;VLG4_001509;VLG7_000141;VLG7_001482;VLG10_001156;VLG2_001279;VLG4_001511;VLG10_001157;VLG10_001697;VLG10_001695;VLG2_001278;VLG11_000751;VLG7_001509;VLG4_001510;VLG10_001700;VLG4_001508;VLG7_001511;VLG2_001273;VLG2_001276;VLG2_000276;VLG1_000597;VLG5_002176;VLG10_000577;VLG7_001497;VLG7_001481;VLG10_001689;VLG4_000318;VLG7_001211;VLG10…	1.52043
GO:0051194	obsolete positive regulation of cofactor metabolic process	BP	17/3560	21/24793	17/21	Leaf_vs_Root	0.000223963	0.0138162	VLG3_001256;VLG2_000725;VLG9_001568;VLG3_001259;VLG6_002124;VLG2_000723;VLG1_000974;VLG9_001720;VLG1_000661;VLG2_000726;VLG7_001945;VLG6_001065;VLG2_000719;VLG4_000772;VLG2_000721;VLG6_000017;VLG7_000893	1.98587
GO:0071669	plant-type cell wall organization or biogenesis	BP	112/3560	210/24793	112/210	Leaf_vs_Root	0.000194992	0.0123087	VLG6_001789;VLG7_000520;VLG2_001016;VLG8_000354;VLG1_001423;VLG5_002117;VLG1_001492;VLG10_001456;VLG7_000501;VLG1_002327;VLG2_000867;VLG6_001591;VLG12_000010;VLG5_000541;VLG7_001835;VLG8_001143;VLG5_002124;VLG1_002317;VLG11_001245;VLG12_000163;VLG10_000563;VLG6_000127;VLG2_001588;VLG8_001139;VLG11_000550;VLG4_000469;VLG12_001251;VLG6_001305;VLG10_000126;VLG11_000966;VLG5_002125;VLG12_000351;VLG9_…	1.30852
GO:0009698	phenylpropanoid metabolic process	BP	59/3560	99/24793	59/99	Leaf_vs_Root	0.000143445	0.00949653	VLG6_001956;VLG12_000307;VLG2_000228;VLG9_000643;VLG7_000088;VLG3_000173;VLG10_001616;VLG3_001759;VLG6_000019;VLG3_000049;VLG5_001098;VLG6_002084;VLG2_002335;VLG5_001702;VLG4_000030;VLG6_000588;VLG6_000797;VLG12_002235;VLG8_001737;VLG5_001231;VLG5_001706;VLG12_002238;VLG5_002069;VLG5_001701;VLG4_000801;VLG5_000606;VLG7_001771;VLG2_000276;VLG3_001707;VLG11_001601;VLG6_001892;VLG8_001782;VLG3_00171…	1.46188
GO:1901615	organic hydroxy compound metabolic process	BP	139/3560	266/24793	139/266	Leaf_vs_Root	0.000125605	0.0083836	VLG2_000600;VLG2_000244;VLG8_001919;VLG10_001616;VLG1_000308;VLG9_000378;VLG2_000935;VLG7_001198;VLG2_001899;VLG5_000095;VLG2_000250;VLG1_001668;VLG2_000234;VLG1_000779;VLG12_000438;VLG1_001535;VLG5_001277;VLG6_000593;VLG9_000605;VLG5_000042;VLG5_002069;VLG8_001833;VLG10_000530;VLG1_000780;VLG8_000907;VLG12_000626;VLG6_000548;VLG5_002222;VLG10_000877;VLG3_001142;VLG10_001375;VLG6_001856;VLG9_0014…	1.28268
GO:0000302	response to reactive oxygen species	BP	108/3560	199/24793	108/199	Leaf_vs_Root	0.000101727	0.00714106	VLG1_001514;VLG7_000854;VLG1_001232;VLG12_002246;VLG3_000416;VLG10_000241;VLG8_000639;VLG3_000923;VLG3_000414;VLG1_001531;VLG5_001593;VLG6_001237;VLG11_000313;VLG7_000682;VLG10_000231;VLG7_001186;VLG5_001592;VLG3_001424;VLG1_000597;VLG1_000450;VLG10_000681;VLG12_000626;VLG11_001395;VLG1_000003;VLG11_001381;VLG7_000855;VLG3_001003;VLG3_001404;VLG3_000534;VLG3_000415;VLG5_000239;VLG5_001325;VLG11_0…	1.33171
GO:0009751	response to salicylic acid	BP	112/3560	207/24793	112/207	Leaf_vs_Root	9.03343e-05	0.00639645	VLG7_000854;VLG9_001356;VLG3_000416;VLG8_000830;VLG11_000207;VLG2_001610;VLG3_000414;VLG4_001177;VLG11_000753;VLG11_000203;VLG5_001133;VLG7_001186;VLG11_000195;VLG3_000510;VLG1_000450;VLG11_000198;VLG5_000209;VLG3_000040;VLG3_001484;VLG7_000855;VLG6_002043;VLG1_001132;VLG3_000273;VLG11_000882;VLG3_001003;VLG3_001404;VLG7_000981;VLG10_000761;VLG3_000415;VLG6_001116;VLG5_001325;VLG8_000678;VLG5_001…	1.32777
GO:0007018	microtubule-based movement	BP	52/3560	84/24793	52/84	Leaf_vs_Root	8.84745e-05	0.00631972	VLG2_000685;VLG9_000494;VLG2_000179;VLG1_001360;VLG8_001892;VLG1_001484;VLG7_001317;VLG6_000608;VLG1_001860;VLG9_000496;VLG2_000137;VLG8_000775;VLG9_001020;VLG3_001161;VLG6_000303;VLG12_000790;VLG8_002189;VLG1_001148;VLG7_001874;VLG6_001270;VLG2_001234;VLG5_001354;VLG2_000167;VLG3_001068;VLG11_000772;VLG8_000019;VLG1_001724;VLG12_000436;VLG6_001398;VLG10_001830;VLG8_000074;VLG6_000056;VLG12_00176…	1.51861
GO:0000271	polysaccharide biosynthetic process	BP	76/3560	132/24793	76/132	Leaf_vs_Root	8.71795e-05	0.00628232	VLG12_000307;VLG10_001457;VLG3_000257;VLG6_001789;VLG2_000865;VLG2_001698;VLG6_001303;VLG7_000023;VLG11_000692;VLG11_001469;VLG3_000209;VLG2_001588;VLG2_002335;VLG4_001279;VLG7_000520;VLG12_001251;VLG8_000354;VLG8_001737;VLG5_002125;VLG2_000864;VLG8_002084;VLG8_000168;VLG3_000854;VLG5_002116;VLG1_001423;VLG10_001745;VLG2_000868;VLG10_001454;VLG11_000534;VLG9_001665;VLG12_002308;VLG1_002198;VLG5_0…	1.41243
GO:0006721	terpenoid metabolic process	BP	104/3560	190/24793	104/190	Leaf_vs_Root	8.67701e-05	0.00628232	VLG8_001919;VLG3_001044;VLG11_001136;VLG5_001328;VLG1_000308;VLG1_001468;VLG9_000378;VLG9_001633;VLG1_001515;VLG11_000976;VLG7_000511;VLG5_001593;VLG1_000537;VLG10_001074;VLG12_000438;VLG1_000809;VLG3_000903;VLG8_001833;VLG5_001592;VLG3_000599;VLG12_000928;VLG12_001416;VLG6_000802;VLG12_001932;VLG12_001933;VLG2_000676;VLG8_001602;VLG5_000703;VLG9_001628;VLG3_000607;VLG8_002124;VLG7_001391;VLG10_0…	1.34312
GO:0034637	obsolete cellular carbohydrate biosynthetic process	BP	78/3560	136/24793	78/136	Leaf_vs_Root	8.47072e-05	0.00621415	VLG6_001789;VLG11_000692;VLG11_001469;VLG7_000520;VLG4_000461;VLG8_000354;VLG8_000168;VLG1_001423;VLG9_001665;VLG5_002117;VLG10_001456;VLG2_000867;VLG3_000007;VLG5_000541;VLG10_001624;VLG8_000753;VLG5_002124;VLG1_002317;VLG3_000257;VLG4_000223;VLG2_001698;VLG2_001588;VLG12_001251;VLG5_002125;VLG10_001454;VLG11_000534;VLG12_002308;VLG1_002198;VLG3_000006;VLG9_000868;VLG4_000320;VLG1_001723;VLG8_00…	1.40698
GO:0051274	beta-glucan biosynthetic process	BP	32/3560	46/24793	32/46	Leaf_vs_Root	8.44384e-05	0.00621415	VLG2_000865;VLG7_000023;VLG3_000209;VLG7_000520;VLG8_000354;VLG5_002125;VLG2_000864;VLG3_000854;VLG2_000868;VLG10_001454;VLG9_001665;VLG8_000035;VLG5_002117;VLG6_002006;VLG10_001456;VLG2_000867;VLG5_000475;VLG1_001723;VLG8_000036;VLG10_001455;VLG1_000282;VLG5_002118;VLG3_000855;VLG10_001457;VLG5_002124;VLG5_002119;VLG5_002115;VLG2_000866;VLG1_002317;VLG5_002120;VLG8_001429;VLG5_002116	1.70683
GO:0055065	obsolete metal ion homeostasis	BP	107/3560	196/24793	107/196	Leaf_vs_Root	7.97838e-05	0.00596036	VLG12_000814;VLG2_000172;VLG2_000141;VLG8_000976;VLG12_001228;VLG2_000071;VLG12_000402;VLG8_000742;VLG4_000459;VLG3_001096;VLG3_000510;VLG7_001230;VLG1_000597;VLG6_000375;VLG11_001169;VLG2_002296;VLG12_000626;VLG2_000133;VLG11_001395;VLG11_000997;VLG3_000089;VLG2_001247;VLG11_001575;VLG3_001516;VLG1_001951;VLG3_000470;VLG2_002158;VLG2_002287;VLG2_000156;VLG2_002286;VLG2_000070;VLG12_000767;VLG10_…	1.33964
GO:0033692	obsolete cellular polysaccharide biosynthetic process	BP	69/3560	117/24793	69/117	Leaf_vs_Root	6.49913e-05	0.00490023	VLG12_000307;VLG3_000257;VLG6_001789;VLG2_000865;VLG2_001698;VLG6_001303;VLG7_000023;VLG11_000692;VLG11_001469;VLG3_000209;VLG2_001588;VLG2_002335;VLG12_001251;VLG7_000520;VLG8_000354;VLG8_001737;VLG5_002125;VLG2_000864;VLG3_000854;VLG8_000168;VLG1_001423;VLG10_001745;VLG2_000868;VLG10_001454;VLG11_000534;VLG9_001665;VLG12_002308;VLG1_002198;VLG5_002117;VLG8_000035;VLG4_000189;VLG6_002006;VLG7_00…	1.44675
GO:0050801	monoatomic ion homeostasis	BP	150/3560	286/24793	150/286	Leaf_vs_Root	5.4534e-05	0.00415019	VLG11_000811;VLG12_000814;VLG10_001453;VLG2_000172;VLG2_000141;VLG8_000976;VLG8_000406;VLG12_001228;VLG5_000106;VLG7_000770;VLG10_001673;VLG1_001668;VLG2_000071;VLG12_001273;VLG12_000679;VLG12_000402;VLG4_000459;VLG8_000742;VLG3_001096;VLG3_000510;VLG7_001230;VLG1_000597;VLG6_000375;VLG5_000234;VLG11_001169;VLG2_002296;VLG12_000626;VLG2_000133;VLG11_001395;VLG11_000997;VLG3_000089;VLG1_001508;VLG…	1.28796
GO:0098542	defense response to other organism	BP	363/3560	757/24793	363/757	Leaf_vs_Root	4.40045e-05	0.00338046	VLG7_000862;VLG9_001356;VLG8_000830;VLG11_000207;VLG2_000788;VLG10_001923;VLG8_001669;VLG10_000917;VLG9_000419;VLG8_001050;VLG11_000203;VLG7_001186;VLG3_000040;VLG4_000592;VLG7_000437;VLG6_001704;VLG1_001445;VLG1_001444;VLG2_000721;VLG7_000370;VLG7_000833;VLG12_001465;VLG5_001894;VLG1_001132;VLG7_001503;VLG6_000452;VLG3_000415;VLG9_000392;VLG5_000638;VLG5_001325;VLG7_001515;VLG2_001858;VLG8_00226…	1.18176
GO:0030244	cellulose biosynthetic process	BP	32/3560	45/24793	32/45	Leaf_vs_Root	4.23419e-05	0.00328371	VLG2_000865;VLG7_000023;VLG3_000209;VLG7_000520;VLG8_000354;VLG5_002125;VLG2_000864;VLG3_000854;VLG2_000868;VLG10_001454;VLG9_001665;VLG8_000035;VLG5_002117;VLG6_002006;VLG10_001456;VLG2_000867;VLG5_000475;VLG1_001723;VLG8_000036;VLG10_001455;VLG1_000282;VLG5_002118;VLG3_000855;VLG10_001457;VLG5_002124;VLG5_002119;VLG5_002115;VLG2_000866;VLG1_002317;VLG5_002120;VLG8_001429;VLG5_002116	1.74449
GO:0006720	isoprenoid metabolic process	BP	121/3560	223/24793	121/223	Leaf_vs_Root	4.06182e-05	0.00318032	VLG8_001919;VLG3_001044;VLG11_001136;VLG5_001328;VLG1_000308;VLG1_001468;VLG9_000378;VLG9_001633;VLG6_001708;VLG1_001515;VLG11_000976;VLG3_001135;VLG7_000511;VLG5_001593;VLG1_000537;VLG10_001074;VLG12_000438;VLG1_000809;VLG3_000903;VLG8_001833;VLG8_000121;VLG5_001592;VLG3_000599;VLG6_001704;VLG2_001927;VLG12_000928;VLG12_001416;VLG6_000802;VLG12_001932;VLG12_001933;VLG2_000676;VLG8_001602;VLG5_00…	1.33199
GO:0071554	cell wall organization or biogenesis	BP	183/3560	356/24793	183/356	Leaf_vs_Root	4.03525e-05	0.00318032	VLG6_001789;VLG12_001182;VLG11_000692;VLG11_000019;VLG4_000262;VLG2_000788;VLG6_001708;VLG7_000520;VLG2_001016;VLG6_000588;VLG8_000354;VLG8_000168;VLG9_000419;VLG6_000934;VLG1_001423;VLG3_001603;VLG5_002117;VLG4_001270;VLG1_001492;VLG10_001456;VLG7_000501;VLG2_000867;VLG1_002327;VLG6_001591;VLG1_000054;VLG10_000664;VLG6_000906;VLG6_001704;VLG12_000010;VLG7_000612;VLG2_001114;VLG5_000541;VLG7_0018…	1.26317
GO:0009642	response to light intensity	BP	83/3560	143/24793	83/143	Leaf_vs_Root	2.81356e-05	0.00229108	VLG1_001514;VLG10_000459;VLG9_000591;VLG3_000320;VLG11_000207;VLG5_001289;VLG5_002241;VLG11_000751;VLG11_000203;VLG7_000682;VLG10_000011;VLG11_000195;VLG1_001222;VLG1_000597;VLG6_000375;VLG11_000198;VLG12_000134;VLG2_000419;VLG12_000606;VLG10_000350;VLG3_000089;VLG7_000833;VLG6_001130;VLG10_000411;VLG10_000690;VLG5_000239;VLG8_000260;VLG2_000326;VLG1_000173;VLG10_001301;VLG12_002303;VLG6_000208;V…	1.4242
GO:1901617	organic hydroxy compound biosynthetic process	BP	90/3560	157/24793	90/157	Leaf_vs_Root	2.57041e-05	0.00211423	VLG2_000244;VLG8_001919;VLG10_001616;VLG1_000308;VLG9_000378;VLG2_000935;VLG7_001198;VLG2_001899;VLG2_000250;VLG1_001668;VLG2_000234;VLG12_000438;VLG6_000593;VLG5_000042;VLG5_002069;VLG8_001833;VLG8_000907;VLG6_000548;VLG10_000877;VLG3_001142;VLG6_001856;VLG10_000411;VLG2_001218;VLG10_000192;VLG2_000339;VLG2_000676;VLG3_000190;VLG3_001167;VLG2_000236;VLG2_001639;VLG1_001491;VLG2_000240;VLG2_00023…	1.40675
GO:0009834	plant-type secondary cell wall biogenesis	BP	33/3560	46/24793	33/46	Leaf_vs_Root	2.39247e-05	0.00198794	VLG2_000865;VLG3_000910;VLG6_001789;VLG3_000173;VLG10_001678;VLG8_001139;VLG11_000550;VLG12_002352;VLG6_001305;VLG8_000354;VLG2_000864;VLG3_000574;VLG9_001020;VLG1_001423;VLG2_000868;VLG12_002355;VLG12_002308;VLG4_000801;VLG1_002198;VLG2_000867;VLG7_001670;VLG5_000475;VLG5_000846;VLG12_002353;VLG12_000010;VLG11_001852;VLG12_001915;VLG12_002356;VLG7_001307;VLG7_001291;VLG6_001120;VLG8_001429;VLG12…	1.7597
GO:0009813	flavonoid biosynthetic process	BP	67/3560	110/24793	67/110	Leaf_vs_Root	1.94868e-05	0.00167032	VLG6_001956;VLG2_000243;VLG2_000244;VLG11_001145;VLG2_000246;VLG10_001696;VLG7_001498;VLG7_000172;VLG7_001510;VLG4_001509;VLG7_000141;VLG7_001198;VLG11_001885;VLG12_001019;VLG10_001156;VLG2_000245;VLG2_000250;VLG11_001599;VLG11_001596;VLG4_001511;VLG2_000234;VLG10_001697;VLG10_001695;VLG7_001509;VLG10_001157;VLG4_001510;VLG11_001597;VLG2_000236;VLG2_001639;VLG10_001700;VLG4_001508;VLG7_001511;VLG…	1.49438
GO:0009699	phenylpropanoid biosynthetic process	BP	55/3560	86/24793	55/86	Leaf_vs_Root	1.44361e-05	0.00132082	VLG6_001956;VLG12_000307;VLG2_000228;VLG9_000643;VLG7_000088;VLG3_000173;VLG10_001616;VLG3_001759;VLG6_000019;VLG3_000049;VLG5_001098;VLG6_002084;VLG2_002335;VLG5_001702;VLG4_000030;VLG6_000588;VLG6_000797;VLG8_001737;VLG5_001231;VLG5_001706;VLG5_002069;VLG5_001701;VLG5_000606;VLG7_001771;VLG3_001707;VLG11_001601;VLG6_001892;VLG8_001782;VLG3_001710;VLG11_001532;VLG5_001710;VLG7_001569;VLG5_001099…	1.56895
GO:0009832	plant-type cell wall biogenesis	BP	76/3560	127/24793	76/127	Leaf_vs_Root	1.37394e-05	0.00127136	VLG12_000307;VLG2_000865;VLG6_001789;VLG3_000910;VLG3_000173;VLG10_001678;VLG8_001388;VLG2_001588;VLG11_000550;VLG8_001139;VLG4_000469;VLG12_002352;VLG2_002335;VLG12_001251;VLG7_000520;VLG6_001305;VLG8_000354;VLG8_001737;VLG5_002125;VLG3_000574;VLG12_000351;VLG9_001020;VLG2_000864;VLG3_000854;VLG1_001423;VLG2_000868;VLG10_001454;VLG12_002308;VLG8_000035;VLG12_002355;VLG1_002198;VLG5_002117;VLG9_0…	1.46842
GO:0006091	generation of precursor metabolites and energy	BP	108/3560	192/24793	108/192	Leaf_vs_Root	1.34045e-05	0.00125463	VLG10_000459;VLG11_000738;VLG19_000005;VLG8_001048;VLG12_001545;VLG6_000549;VLG3_000709;VLG4_001041;VLG1_000297;VLG6_000222;VLG8_001717;VLG1_001423;VLG19_000003;VLG10_000011;VLG1_001222;VLG7_000572;VLG2_000183;VLG8_000528;VLG12_000626;VLG1_000620;VLG4_000490;VLG24_000028;VLG12_001130;VLG10_001375;VLG6_000315;VLG10_000690;VLG4_001198;VLG12_000704;VLG2_000683;VLG12_002181;VLG4_001519;VLG10_001815;V…	1.38093
GO:0009733	response to auxin	BP	176/3560	335/24793	176/335	Leaf_vs_Root	1.12246e-05	0.00107532	VLG7_000854;VLG1_001232;VLG12_001480;VLG3_000416;VLG5_001389;VLG10_000869;VLG2_000172;VLG1_002154;VLG2_000141;VLG1_001378;VLG4_000424;VLG3_000414;VLG6_000942;VLG10_001142;VLG5_001820;VLG11_001856;VLG4_000555;VLG12_000874;VLG2_000887;VLG7_001589;VLG5_000445;VLG2_000928;VLG10_000231;VLG7_001186;VLG3_001424;VLG3_000652;VLG1_000450;VLG3_001650;VLG3_000653;VLG7_001558;VLG11_000245;VLG6_001337;VLG8_001…	1.29144
GO:0042742	defense response to bacterium	BP	231/3560	454/24793	231/454	Leaf_vs_Root	1.04368e-05	0.00101175	VLG12_001385;VLG3_000779;VLG7_000862;VLG7_000854;VLG9_001356;VLG3_000416;VLG8_000830;VLG11_001469;VLG2_000788;VLG10_001923;VLG8_001033;VLG6_001708;VLG1_001211;VLG2_001016;VLG4_000025;VLG12_002049;VLG1_001668;VLG3_000414;VLG6_000523;VLG12_002182;VLG9_000419;VLG3_001603;VLG5_000621;VLG4_001270;VLG7_001186;VLG4_000482;VLG1_000450;VLG9_000291;VLG3_000040;VLG5_000209;VLG7_001665;VLG7_000437;VLG2_00174…	1.25206
GO:0009628	response to abiotic stimulus	BP	774/3560	1688/24793	774/1688	Leaf_vs_Root	9.76165e-06	0.0009577	VLG10_000459;VLG7_001180;VLG6_001378;VLG11_000811;VLG9_001356;VLG2_001029;VLG10_001453;VLG8_000830;VLG9_000378;VLG7_001482;VLG11_000207;VLG10_001923;VLG6_001065;VLG1_001146;VLG11_001168;VLG6_000708;VLG5_001289;VLG7_000775;VLG1_001560;VLG5_002241;VLG1_000537;VLG8_000912;VLG10_001848;VLG11_000751;VLG8_001717;VLG9_001159;VLG5_000445;VLG8_001872;VLG11_000203;VLG8_001050;VLG12_001752;VLG10_000011;VLG7…	1.13824
GO:0048564	photosystem I assembly	BP	13/3560	13/24793	13/13	Leaf_vs_Root	9.3216e-06	0.000925681	VLG12_001130;VLG5_000300;VLG7_000936;VLG24_000026;VLG12_002181;VLG8_000896;VLG2_000183;VLG10_001815;VLG10_000044;VLG10_000690;VLG19_000003;VLG1_002012;VLG1_001222	2.43944
GO:0042546	cell wall biogenesis	BP	88/3560	150/24793	88/150	Leaf_vs_Root	9.13631e-06	0.0009222	VLG6_001789;VLG7_000520;VLG8_000354;VLG8_000168;VLG6_000934;VLG1_001423;VLG5_002117;VLG1_001492;VLG10_001456;VLG2_000867;VLG12_000010;VLG5_000541;VLG5_002124;VLG1_002317;VLG3_000257;VLG5_002005;VLG2_001588;VLG11_000550;VLG8_001139;VLG4_000469;VLG12_001676;VLG12_001251;VLG6_001305;VLG5_002125;VLG12_000351;VLG9_001020;VLG10_001454;VLG11_000534;VLG12_002308;VLG1_002198;VLG9_001346;VLG7_001670;VLG5_0…	1.43989
GO:1901657	glycosyl compound metabolic process	BP	135/3560	247/24793	135/247	Leaf_vs_Root	9.17331e-06	0.0009222	VLG5_000278;VLG8_001919;VLG2_001282;VLG6_001188;VLG7_001482;VLG5_001702;VLG6_001708;VLG4_001511;VLG4_000889;VLG5_001706;VLG12_001328;VLG7_001509;VLG12_000438;VLG7_001658;VLG5_000290;VLG12_001325;VLG5_000287;VLG5_001701;VLG5_002030;VLG6_001704;VLG1_001445;VLG7_000768;VLG7_001223;VLG12_002144;VLG12_001322;VLG1_001444;VLG5_001711;VLG9_001482;VLG6_000452;VLG4_001505;VLG9_000392;VLG6_001116;VLG5_00028…	1.34257
GO:0051187	obsolete cofactor catabolic process	BP	35/3560	48/24793	35/48	Leaf_vs_Root	7.46345e-06	0.000769302	VLG1_001232;VLG2_000943;VLG1_000679;VLG7_001330;VLG2_000942;VLG1_000366;VLG12_002056;VLG12_001802;VLG12_002049;VLG1_002270;VLG12_001804;VLG12_002057;VLG7_001331;VLG11_000052;VLG11_000313;VLG6_001602;VLG8_002124;VLG9_001191;VLG12_000304;VLG6_000413;VLG12_002041;VLG7_001576;VLG10_000129;VLG12_002055;VLG7_000113;VLG1_000661;VLG1_001804;VLG10_001376;VLG12_001803;VLG8_001855;VLG7_000530;VLG2_001163;VL…	1.78828
GO:0009611	response to wounding	BP	169/3560	318/24793	169/318	Leaf_vs_Root	6.98904e-06	0.000729638	VLG9_001356;VLG4_000485;VLG8_000830;VLG2_000172;VLG11_000207;VLG2_000141;VLG11_000976;VLG4_000025;VLG2_000071;VLG5_001225;VLG5_001593;VLG12_002182;VLG8_001050;VLG11_000203;VLG10_000530;VLG10_000231;VLG10_000011;VLG5_001592;VLG11_000195;VLG8_000929;VLG3_000599;VLG11_000198;VLG7_001558;VLG5_000209;VLG2_002296;VLG4_000318;VLG2_000133;VLG2_000331;VLG7_001223;VLG12_000606;VLG6_000683;VLG3_001142;VLG7_…	1.3064
GO:0009719	response to endogenous stimulus	BP	665/3560	1432/24793	665/1432	Leaf_vs_Root	6.58723e-06	0.000696621	VLG10_000459;VLG7_000862;VLG7_001180;VLG9_001356;VLG8_000830;VLG1_002154;VLG10_000543;VLG11_000207;VLG10_001923;VLG6_001065;VLG11_000976;VLG9_000131;VLG1_000537;VLG5_000660;VLG10_001848;VLG5_000677;VLG11_001856;VLG1_001535;VLG10_000989;VLG1_000809;VLG5_000445;VLG5_000676;VLG2_000887;VLG11_000203;VLG7_001186;VLG5_001592;VLG8_000929;VLG3_000653;VLG3_000040;VLG3_000662;VLG11_001857;VLG6_000548;VLG5_…	1.15132
GO:0009639	response to red or far red light	BP	85/3560	143/24793	85/143	Leaf_vs_Root	6.33193e-06	0.000678433	VLG10_000459;VLG5_000960;VLG6_001367;VLG9_000591;VLG1_001084;VLG9_000378;VLG6_001065;VLG4_000416;VLG1_001146;VLG8_000912;VLG11_000751;VLG12_000578;VLG8_001717;VLG8_001027;VLG11_000753;VLG6_000164;VLG2_001466;VLG1_000597;VLG6_000956;VLG1_000003;VLG12_000134;VLG10_000350;VLG1_000289;VLG3_000089;VLG8_002106;VLG10_001759;VLG8_000807;VLG1_002064;VLG6_000711;VLG10_001301;VLG6_000866;VLG4_000270;VLG8_00…	1.4589
GO:0009833	plant-type primary cell wall biogenesis	BP	27/3560	34/24793	27/34	Leaf_vs_Root	5.65274e-06	0.000613737	VLG2_000865;VLG8_000354;VLG5_002125;VLG2_000864;VLG3_000854;VLG2_000868;VLG10_001454;VLG8_000035;VLG5_002117;VLG6_002006;VLG10_001456;VLG2_000867;VLG5_000475;VLG8_000036;VLG10_001455;VLG1_000282;VLG5_002118;VLG3_000855;VLG10_001457;VLG5_002124;VLG5_002119;VLG5_002115;VLG2_000866;VLG1_002317;VLG5_002120;VLG8_001429;VLG5_002116	1.94655
GO:0009725	response to hormone	BP	644/3560	1381/24793	644/1381	Leaf_vs_Root	4.88459e-06	0.000537503	VLG10_000459;VLG7_000862;VLG7_001180;VLG9_001356;VLG8_000830;VLG1_002154;VLG10_000543;VLG11_000207;VLG10_001923;VLG6_001065;VLG11_000976;VLG9_000131;VLG1_000537;VLG5_000660;VLG10_001848;VLG5_000677;VLG11_001856;VLG1_001535;VLG10_000989;VLG1_000809;VLG5_000445;VLG5_000676;VLG2_000887;VLG11_000203;VLG7_001186;VLG5_001592;VLG8_000929;VLG3_000653;VLG3_000040;VLG3_000662;VLG11_001857;VLG6_000548;VLG5_…	1.15604
GO:0009605	response to external stimulus	BP	639/3560	1369/24793	639/1369	Leaf_vs_Root	4.61005e-06	0.000514241	VLG6_000914;VLG7_000862;VLG2_000244;VLG7_001180;VLG8_001250;VLG9_001356;VLG11_000948;VLG8_000830;VLG11_000207;VLG2_000788;VLG10_001923;VLG1_001888;VLG11_000976;VLG8_001669;VLG11_001168;VLG10_000917;VLG11_000751;VLG10_000989;VLG9_000419;VLG5_000445;VLG11_000203;VLG8_001050;VLG6_001237;VLG7_001186;VLG5_001592;VLG2_000450;VLG8_000929;VLG8_002008;VLG3_000040;VLG7_000437;VLG4_000592;VLG6_001704;VLG1_0…	1.15708
GO:0010114	response to red light	BP	36/3560	49/24793	36/49	Leaf_vs_Root	4.12341e-06	0.000466346	VLG10_000459;VLG6_001367;VLG10_001300;VLG9_000591;VLG1_001084;VLG1_002064;VLG1_000361;VLG2_001523;VLG9_000378;VLG6_000711;VLG6_001065;VLG10_001301;VLG11_000751;VLG1_001271;VLG2_001466;VLG11_001727;VLG11_001420;VLG9_000836;VLG1_000597;VLG6_000410;VLG1_000661;VLG6_000929;VLG4_001221;VLG12_000134;VLG12_001697;VLG10_000350;VLG11_000525;VLG1_000289;VLG5_001004;VLG1_000974;VLG8_002106;VLG6_000241;VLG11…	1.80171
GO:0009767	photosynthetic electron transport chain	BP	26/3560	32/24793	26/32	Leaf_vs_Root	3.85159e-06	0.000441739	VLG8_000169;VLG8_001048;VLG7_000020;VLG3_000709;VLG4_001041;VLG3_000984;VLG1_000297;VLG10_000618;VLG1_001942;VLG5_001092;VLG7_000894;VLG8_000188;VLG10_001916;VLG3_000006;VLG6_000960;VLG7_000019;VLG4_000491;VLG7_000693;VLG8_002353;VLG1_000661;VLG11_000849;VLG4_000490;VLG6_001358;VLG4_000772;VLG4_001198;VLG5_000061	1.99113
GO:0015996	chlorophyll catabolic process	BP	19/3560	21/24793	19/21	Leaf_vs_Root	3.4623e-06	0.00041461	VLG2_000943;VLG2_000942;VLG12_002056;VLG12_002049;VLG12_002057;VLG11_000052;VLG9_001191;VLG12_000304;VLG6_000413;VLG12_002041;VLG7_001576;VLG12_002055;VLG1_000661;VLG10_001376;VLG8_001855;VLG2_001163;VLG12_002050;VLG2_000944;VLG12_002042	2.2137
GO:0046149	pigment catabolic process	BP	19/3560	21/24793	19/21	Leaf_vs_Root	3.4623e-06	0.00041461	VLG2_000943;VLG2_000942;VLG12_002056;VLG12_002049;VLG12_002057;VLG11_000052;VLG9_001191;VLG12_000304;VLG6_000413;VLG12_002041;VLG7_001576;VLG12_002055;VLG1_000661;VLG10_001376;VLG8_001855;VLG2_001163;VLG12_002050;VLG2_000944;VLG12_002042	2.2137
GO:0009658	chloroplast organization	BP	89/3560	148/24793	89/148	Leaf_vs_Root	1.95388e-06	0.000248601	VLG6_001367;VLG10_000895;VLG6_001065;VLG3_000764;VLG12_002182;VLG11_000751;VLG12_000583;VLG10_000542;VLG1_000289;VLG7_000064;VLG12_000677;VLG11_000788;VLG2_000556;VLG10_000690;VLG3_000355;VLG1_000699;VLG7_000991;VLG10_001180;VLG2_002343;VLG2_001707;VLG11_000877;VLG5_001174;VLG12_001689;VLG2_001370;VLG7_000936;VLG2_000221;VLG10_001778;VLG8_000148;VLG12_002209;VLG2_000101;VLG8_000896;VLG1_001227;VL…	1.47631
GO:0006787	porphyrin-containing compound catabolic process	BP	20/3560	22/24793	20/22	Leaf_vs_Root	1.55517e-06	0.000201012	VLG2_000943;VLG2_000942;VLG12_002056;VLG12_002049;VLG12_002057;VLG11_000052;VLG8_002124;VLG9_001191;VLG12_000304;VLG6_000413;VLG12_002041;VLG7_001576;VLG12_002055;VLG1_000661;VLG10_001376;VLG8_001855;VLG2_001163;VLG12_002050;VLG2_000944;VLG12_002042	2.22405
GO:0033015	tetrapyrrole catabolic process	BP	20/3560	22/24793	20/22	Leaf_vs_Root	1.55517e-06	0.000201012	VLG2_000943;VLG2_000942;VLG12_002056;VLG12_002049;VLG12_002057;VLG11_000052;VLG8_002124;VLG9_001191;VLG12_000304;VLG6_000413;VLG12_002041;VLG7_001576;VLG12_002055;VLG1_000661;VLG10_001376;VLG8_001855;VLG2_001163;VLG12_002050;VLG2_000944;VLG12_002042	2.22405
GO:0046148	pigment biosynthetic process	BP	83/3560	135/24793	83/135	Leaf_vs_Root	1.20385e-06	0.000160705	VLG2_000244;VLG1_000515;VLG10_001696;VLG3_001044;VLG11_001136;VLG7_000141;VLG7_001198;VLG9_001633;VLG1_001515;VLG2_000250;VLG4_001511;VLG2_000234;VLG7_001509;VLG1_002168;VLG4_000318;VLG5_001505;VLG10_000877;VLG10_001624;VLG3_001142;VLG2_001218;VLG7_001090;VLG11_000882;VLG7_001087;VLG4_001505;VLG12_001416;VLG7_000991;VLG7_001498;VLG4_001509;VLG10_001156;VLG10_001697;VLG9_001628;VLG10_001695;VLG9_0…	1.50928
GO:0006952	defense response	BP	473/3560	976/24793	473/976	Leaf_vs_Root	6.51526e-07	9.30767e-05	VLG6_000914;VLG7_000862;VLG1_000196;VLG9_001356;VLG2_002280;VLG8_000830;VLG11_000207;VLG2_000788;VLG10_001923;VLG2_001938;VLG8_001669;VLG10_000917;VLG9_000419;VLG8_001050;VLG11_000203;VLG7_001186;VLG6_000631;VLG3_000040;VLG4_000592;VLG7_000437;VLG6_001704;VLG1_000071;VLG1_001445;VLG1_001444;VLG2_000721;VLG8_001264;VLG7_000370;VLG7_000833;VLG2_001247;VLG12_001465;VLG5_001894;VLG1_001132;VLG7_00150…	1.1996
GO:0009657	plastid organization	BP	120/3560	205/24793	120/205	Leaf_vs_Root	2.74512e-07	3.9917e-05	VLG6_001367;VLG10_000895;VLG8_002184;VLG6_001065;VLG3_000764;VLG12_002182;VLG11_000751;VLG12_000583;VLG10_000542;VLG1_000620;VLG1_000289;VLG7_000064;VLG12_000677;VLG11_000788;VLG5_001124;VLG7_001017;VLG2_000556;VLG10_000690;VLG3_000355;VLG1_000699;VLG7_000991;VLG10_001180;VLG2_002343;VLG2_001707;VLG11_000877;VLG12_001149;VLG12_002279;VLG3_000183;VLG5_001174;VLG12_001689;VLG2_001370;VLG7_000936;VL…	1.43857
GO:0009617	response to bacterium	BP	281/3560	541/24793	281/541	Leaf_vs_Root	1.13294e-07	1.74067e-05	VLG12_001385;VLG6_000914;VLG7_000862;VLG3_000779;VLG7_000854;VLG9_001356;VLG3_000416;VLG8_000830;VLG11_001469;VLG2_000788;VLG10_001923;VLG7_001330;VLG8_001033;VLG6_001708;VLG1_001211;VLG2_001016;VLG4_000025;VLG12_002049;VLG1_001668;VLG3_000414;VLG6_000523;VLG5_001225;VLG5_001593;VLG12_002182;VLG9_000419;VLG3_001603;VLG5_000621;VLG4_001270;VLG7_001186;VLG5_001592;VLG2_000450;VLG4_000482;VLG8_00200…	1.28175
GO:0006778	porphyrin-containing compound metabolic process	BP	44/3560	57/24793	44/57	Leaf_vs_Root	2.86143e-08	4.8543e-06	VLG2_000065;VLG1_000515;VLG2_000943;VLG7_000991;VLG3_001044;VLG2_001523;VLG7_000141;VLG2_000942;VLG7_000770;VLG5_000018;VLG12_002056;VLG2_001166;VLG12_002049;VLG12_002057;VLG8_001063;VLG9_001758;VLG9_000033;VLG11_000052;VLG8_002124;VLG9_001191;VLG12_000304;VLG6_000413;VLG12_002041;VLG7_001576;VLG11_000556;VLG12_002055;VLG12_001662;VLG1_002168;VLG1_000661;VLG1_001128;VLG5_001505;VLG11_000567;VLG12…	1.89277
GO:0080167	response to karrikin	BP	85/3560	131/24793	85/131	Leaf_vs_Root	2.74978e-08	4.8543e-06	VLG7_001180;VLG9_000591;VLG2_001029;VLG2_000717;VLG7_001482;VLG1_001211;VLG11_001599;VLG11_001597;VLG5_000445;VLG11_001598;VLG4_001002;VLG2_000716;VLG1_000003;VLG9_001567;VLG7_001029;VLG10_000877;VLG9_001742;VLG5_000597;VLG11_000351;VLG7_000390;VLG2_001274;VLG1_002064;VLG11_001413;VLG8_000139;VLG1_000521;VLG12_002235;VLG4_000270;VLG2_001278;VLG8_000188;VLG2_000462;VLG8_000148;VLG9_001399;VLG2_001…	1.59359
GO:0033013	tetrapyrrole metabolic process	BP	45/3560	58/24793	45/58	Leaf_vs_Root	1.50015e-08	2.7146e-06	VLG2_000065;VLG1_000515;VLG2_000943;VLG7_000991;VLG3_001044;VLG2_001523;VLG7_000141;VLG2_000942;VLG7_000770;VLG5_000018;VLG12_002056;VLG2_001166;VLG12_002049;VLG12_002057;VLG8_001063;VLG9_001758;VLG9_000033;VLG11_000052;VLG8_002124;VLG9_001191;VLG12_000304;VLG6_000413;VLG12_002041;VLG7_001576;VLG11_000556;VLG12_002055;VLG12_001662;VLG1_002168;VLG1_000661;VLG1_001128;VLG5_001505;VLG11_000567;VLG12…	1.90244
GO:0019748	secondary metabolic process	BP	199/3560	358/24793	199/358	Leaf_vs_Root	1.32242e-08	2.44738e-06	VLG7_001180;VLG6_001948;VLG10_001616;VLG5_001098;VLG5_001702;VLG6_001708;VLG1_001211;VLG4_000030;VLG6_000588;VLG3_001110;VLG5_001231;VLG5_001706;VLG7_000188;VLG12_000438;VLG6_000473;VLG3_001330;VLG8_001294;VLG1_000809;VLG7_001658;VLG3_001152;VLG3_001150;VLG5_002069;VLG5_001701;VLG3_001424;VLG3_000652;VLG11_001601;VLG6_001337;VLG3_000653;VLG8_000690;VLG8_001364;VLG6_001892;VLG3_001147;VLG6_001704;…	1.36989
GO:0055114	obsolete oxidation-reduction process	BP	472/3560	949/24793	472/949	Leaf_vs_Root	1.16592e-08	2.20792e-06	VLG1_000515;VLG7_000862;VLG6_001378;VLG6_001948;VLG3_000709;VLG9_000378;VLG10_001923;VLG6_000588;VLG10_000917;VLG3_001110;VLG1_001535;VLG1_000809;VLG8_001050;VLG6_001237;VLG3_001150;VLG10_000530;VLG9_001157;VLG7_001576;VLG10_000129;VLG6_001591;VLG1_002168;VLG7_000437;VLG6_001704;VLG1_001445;VLG6_000548;VLG4_000490;VLG1_001444;VLG10_000877;VLG3_001142;VLG7_000530;VLG5_001185;VLG1_001340;VLG8_00069…	1.23375
GO:0009812	flavonoid metabolic process	BP	94/3560	146/24793	94/146	Leaf_vs_Root	9.20545e-09	1.78476e-06	VLG12_001385;VLG2_000244;VLG10_001696;VLG7_000141;VLG7_001482;VLG7_001198;VLG2_000250;VLG11_001599;VLG4_001511;VLG2_000234;VLG7_001509;VLG11_000751;VLG11_001597;VLG11_001598;VLG1_000597;VLG4_000318;VLG10_001205;VLG10_000877;VLG8_001895;VLG10_001624;VLG3_001142;VLG10_001208;VLG9_001419;VLG10_001321;VLG2_001218;VLG7_001090;VLG11_000882;VLG7_001087;VLG4_001505;VLG10_001207;VLG10_000727;VLG10_001215;…	1.58191
GO:0044550	secondary metabolite biosynthetic process	BP	154/3560	264/24793	154/264	Leaf_vs_Root	8.11498e-09	1.61171e-06	VLG6_001948;VLG10_001616;VLG5_001098;VLG5_001702;VLG6_001708;VLG4_000030;VLG6_000588;VLG3_001110;VLG5_001231;VLG5_001706;VLG7_000188;VLG6_000473;VLG3_001330;VLG1_000809;VLG3_001152;VLG5_002069;VLG5_001701;VLG3_001150;VLG3_001424;VLG3_000652;VLG11_001601;VLG6_001337;VLG8_000690;VLG3_000653;VLG8_001364;VLG6_001892;VLG3_001147;VLG6_001704;VLG1_001445;VLG3_000662;VLG7_001223;VLG8_001445;VLG3_000665;V…	1.43594
GO:0009765	photosynthesis, light harvesting	BP	25/3560	26/24793	25/26	Leaf_vs_Root	3.28176e-09	7.07435e-07	VLG10_000459;VLG12_001545;VLG4_001519;VLG6_000711;VLG5_000588;VLG6_000208;VLG2_000498;VLG10_000406;VLG8_000196;VLG8_001717;VLG8_002114;VLG11_001420;VLG11_001727;VLG10_000011;VLG1_001222;VLG10_001832;VLG1_001373;VLG10_001746;VLG10_001753;VLG3_001583;VLG10_000640;VLG6_001003;VLG10_000690;VLG5_001725;VLG12_000704	2.35048
GO:0051707	response to other organism	BP	513/3560	1032/24793	513/1032	Leaf_vs_Root	2.76294e-09	6.24962e-07	VLG6_000914;VLG7_000862;VLG2_000244;VLG8_001250;VLG9_001356;VLG11_000948;VLG8_000830;VLG11_000207;VLG2_000788;VLG10_001923;VLG1_001888;VLG8_001669;VLG11_000976;VLG10_000917;VLG9_000419;VLG10_000989;VLG8_001050;VLG6_001237;VLG11_000203;VLG7_001186;VLG5_001592;VLG2_000450;VLG8_002008;VLG3_000040;VLG4_000592;VLG7_000437;VLG6_001704;VLG1_001445;VLG11_001857;VLG1_000430;VLG1_001444;VLG2_000721;VLG7_00…	1.23505
GO:0009416	response to light stimulus	BP	300/3560	565/24793	300/565	Leaf_vs_Root	2.29887e-09	5.4853e-07	VLG10_000459;VLG1_001514;VLG5_000960;VLG6_001367;VLG6_001154;VLG1_001232;VLG9_000591;VLG7_000183;VLG3_000320;VLG1_000260;VLG8_002273;VLG10_000895;VLG5_001328;VLG1_001084;VLG8_000830;VLG9_000378;VLG11_000207;VLG7_000141;VLG10_001923;VLG7_001198;VLG6_001065;VLG4_000416;VLG5_001010;VLG1_001146;VLG3_000923;VLG1_001634;VLG4_000424;VLG5_001289;VLG7_000775;VLG8_001378;VLG1_001560;VLG12_001961;VLG5_00224…	1.31273
GO:0009607	response to biotic stimulus	BP	517/3560	1040/24793	517/1040	Leaf_vs_Root	2.35768e-09	5.4853e-07	VLG6_000914;VLG7_000862;VLG2_000244;VLG8_001250;VLG9_001356;VLG11_000948;VLG8_000830;VLG11_000207;VLG2_000788;VLG10_001923;VLG1_001888;VLG8_001669;VLG11_000976;VLG10_000917;VLG9_000419;VLG10_000989;VLG8_001050;VLG6_001237;VLG11_000203;VLG7_001186;VLG5_001592;VLG2_000450;VLG8_002008;VLG3_000040;VLG4_000592;VLG7_000437;VLG6_001704;VLG1_001445;VLG11_001857;VLG1_000430;VLG1_001444;VLG2_000721;VLG7_00…	1.23531
GO:0043207	response to external biotic stimulus	BP	516/3560	1035/24793	516/1035	Leaf_vs_Root	1.44057e-09	3.6658e-07	VLG6_000914;VLG7_000862;VLG2_000244;VLG8_001250;VLG9_001356;VLG11_000948;VLG8_000830;VLG11_000207;VLG2_000788;VLG10_001923;VLG1_001888;VLG8_001669;VLG11_000976;VLG10_000917;VLG9_000419;VLG10_000989;VLG8_001050;VLG6_001237;VLG11_000203;VLG7_001186;VLG5_001592;VLG2_000450;VLG8_002008;VLG3_000040;VLG4_000592;VLG7_000437;VLG6_001704;VLG1_001445;VLG11_001857;VLG1_000430;VLG1_001444;VLG2_000721;VLG7_00…	1.23915
GO:0009314	response to radiation	BP	324/3560	614/24793	324/614	Leaf_vs_Root	1.26933e-09	3.33425e-07	VLG10_000459;VLG8_000830;VLG9_000378;VLG11_000207;VLG10_001923;VLG6_001065;VLG1_001146;VLG5_001289;VLG7_000775;VLG1_001560;VLG5_002241;VLG8_000912;VLG11_000751;VLG8_001717;VLG9_001159;VLG8_001872;VLG11_000203;VLG10_000011;VLG12_001752;VLG7_001655;VLG2_000419;VLG6_000903;VLG10_000877;VLG10_001241;VLG7_000833;VLG4_000673;VLG2_002153;VLG12_000393;VLG4_001519;VLG1_002064;VLG6_000711;VLG11_001583;VLG4…	1.30568
GO:0015994	chlorophyll metabolic process	BP	38/3560	43/24793	38/43	Leaf_vs_Root	1.42257e-10	4.45538e-08	VLG2_000065;VLG1_000515;VLG2_000943;VLG7_000991;VLG3_001044;VLG2_001523;VLG7_000141;VLG2_000942;VLG5_000018;VLG12_002056;VLG12_002049;VLG12_002057;VLG8_001063;VLG9_001758;VLG9_000033;VLG11_000052;VLG9_001191;VLG12_000304;VLG6_000413;VLG12_002041;VLG7_001576;VLG11_000556;VLG12_002055;VLG12_001662;VLG1_002168;VLG1_000661;VLG5_001505;VLG10_001376;VLG8_001855;VLG3_000201;VLG9_000729;VLG1_002199;VLG2_…	2.16448
GO:0042440	pigment metabolic process	BP	113/3560	174/24793	113/174	Leaf_vs_Root	1.35397e-10	4.41014e-08	VLG12_001385;VLG2_000244;VLG1_000515;VLG10_001696;VLG3_001044;VLG11_001136;VLG7_000141;VLG7_001482;VLG7_001198;VLG9_001633;VLG1_001515;VLG2_000250;VLG12_002049;VLG4_001511;VLG2_000234;VLG7_001509;VLG11_000751;VLG1_000597;VLG7_001576;VLG1_002168;VLG4_000318;VLG5_001505;VLG10_000877;VLG10_001624;VLG3_001142;VLG2_001218;VLG2_001163;VLG7_001090;VLG11_000882;VLG7_001087;VLG4_001505;VLG12_001416;VLG2_0…	1.59753
GO:0050896	response to stimulus	BP	2069/3560	4627/24793	2069/4627	Leaf_vs_Root	9.34727e-11	3.17145e-08	VLG10_000459;VLG6_000914;VLG1_000515;VLG11_000811;VLG9_001356;VLG11_000948;VLG7_001482;VLG2_000788;VLG8_001597;VLG10_000543;VLG11_001242;VLG1_001888;VLG6_000708;VLG1_000202;VLG2_000071;VLG8_000912;VLG1_001535;VLG5_000445;VLG8_001872;VLG11_000203;VLG7_001186;VLG7_001655;VLG3_000653;VLG1_000071;VLG6_000466;VLG11_001857;VLG6_000903;VLG10_000877;VLG12_000361;VLG10_001241;VLG5_001689;VLG1_001132;VLG4_…	1.15047
GO:0015979	photosynthesis	BP	86/3560	103/24793	86/103	Leaf_vs_Root	6.76169e-19	3.44127e-16	VLG10_000459;VLG11_000738;VLG19_000005;VLG8_001048;VLG12_001545;VLG3_000709;VLG11_001469;VLG4_001041;VLG1_000297;VLG8_001717;VLG19_000003;VLG10_000011;VLG1_001222;VLG2_000183;VLG8_000528;VLG11_001395;VLG12_001488;VLG4_000490;VLG24_000028;VLG12_001130;VLG10_001834;VLG10_000690;VLG4_001198;VLG12_000704;VLG12_002181;VLG4_001519;VLG10_001815;VLG6_000711;VLG19_000010;VLG3_000984;VLG6_000208;VLG7_00089…	2.05348
GO:0019684	photosynthesis, light reaction	BP	71/3560	80/24793	71/80	Leaf_vs_Root	6.03784e-19	3.27774e-16	VLG10_000459;VLG11_000738;VLG19_000005;VLG8_000169;VLG8_001048;VLG12_001545;VLG12_002181;VLG7_000020;VLG4_001519;VLG5_001725;VLG10_001815;VLG3_000709;VLG4_001041;VLG6_000711;VLG3_000984;VLG5_000588;VLG1_000297;VLG10_000618;VLG6_001459;VLG6_000208;VLG1_001942;VLG7_000894;VLG7_000936;VLG10_000406;VLG8_000196;VLG5_001092;VLG2_000498;VLG3_001028;VLG8_000188;VLG8_001717;VLG8_002114;VLG19_000003;VLG10_…	2.1799
GO:0031224	obsolete intrinsic component of membrane	CC	299/3560	634/24793	299/634	Leaf_vs_Root	0.000811063	0.0395478	VLG6_000914;VLG1_000246;VLG2_001029;VLG3_000749;VLG2_000717;VLG11_000337;VLG1_002154;VLG7_000890;VLG7_001330;VLG5_000106;VLG1_000630;VLG7_001595;VLG6_001678;VLG1_000202;VLG1_001998;VLG5_002241;VLG9_000608;VLG11_001856;VLG6_000645;VLG10_000989;VLG9_001737;VLG2_000938;VLG10_001730;VLG12_000981;VLG6_001007;VLG9_000231;VLG3_001127;VLG11_001601;VLG7_000501;VLG1_001650;VLG3_001650;VLG2_000716;VLG8_0005…	1.15904
GO:0005618	cell wall	CC	274/3560	567/24793	274/567	Leaf_vs_Root	0.000201583	0.0125305	VLG6_001241;VLG9_000791;VLG8_001250;VLG6_000533;VLG9_000312;VLG2_000172;VLG2_000141;VLG6_000549;VLG10_001923;VLG10_000802;VLG10_000280;VLG8_001669;VLG4_000157;VLG1_001172;VLG1_001634;VLG6_000588;VLG10_000917;VLG7_000520;VLG6_001692;VLG5_001184;VLG4_000889;VLG2_000071;VLG7_001812;VLG5_001225;VLG4_001161;VLG12_000157;VLG10_000989;VLG10_000170;VLG12_001428;VLG2_001187;VLG5_001133;VLG4_001202;VLG1_00…	1.18827
GO:0030312	external encapsulating structure	CC	274/3560	567/24793	274/567	Leaf_vs_Root	0.000201583	0.0125305	VLG6_001241;VLG9_000791;VLG8_001250;VLG6_000533;VLG9_000312;VLG2_000172;VLG2_000141;VLG6_000549;VLG10_001923;VLG10_000802;VLG10_000280;VLG8_001669;VLG4_000157;VLG1_001172;VLG1_001634;VLG6_000588;VLG10_000917;VLG7_000520;VLG6_001692;VLG5_001184;VLG4_000889;VLG2_000071;VLG7_001812;VLG5_001225;VLG4_001161;VLG12_000157;VLG10_000989;VLG10_000170;VLG12_001428;VLG2_001187;VLG5_001133;VLG4_001202;VLG1_00…	1.18827
GO:0031984	organelle subcompartment	CC	404/3560	858/24793	404/858	Leaf_vs_Root	0.00012178	0.00826378	VLG10_000459;VLG9_001433;VLG3_000709;VLG9_000378;VLG11_000377;VLG5_001289;VLG5_001364;VLG1_000537;VLG8_000912;VLG8_001717;VLG10_000011;VLG5_000984;VLG1_001650;VLG1_002168;VLG5_001928;VLG2_000419;VLG6_001843;VLG4_000490;VLG5_000801;VLG12_001299;VLG12_000385;VLG2_002235;VLG8_002107;VLG8_000692;VLG9_000940;VLG3_001750;VLG5_002237;VLG4_001519;VLG6_000711;VLG5_001584;VLG19_000010;VLG1_001297;VLG12_001…	1.16034
GO:0015630	microtubule cytoskeleton	CC	121/3560	227/24793	121/227	Leaf_vs_Root	0.000113709	0.00791397	VLG6_000533;VLG3_000726;VLG1_002244;VLG12_000515;VLG2_001234;VLG2_000167;VLG11_001232;VLG12_000436;VLG12_000626;VLG1_000962;VLG3_001237;VLG12_000361;VLG9_000593;VLG4_001512;VLG2_000966;VLG12_000791;VLG7_001573;VLG9_001276;VLG1_001155;VLG2_000179;VLG8_001174;VLG4_000469;VLG9_000496;VLG9_001020;VLG3_001161;VLG6_000303;VLG12_000125;VLG7_000923;VLG1_001140;VLG1_001148;VLG6_001270;VLG9_001346;VLG5_001…	1.30814
GO:0009543	chloroplast thylakoid lumen	CC	17/3560	19/24793	17/19	Leaf_vs_Root	1.69209e-05	0.00146582	VLG5_001586;VLG5_001226;VLG12_002181;VLG3_000833;VLG5_001582;VLG10_000640;VLG1_001804;VLG8_002114;VLG11_000413;VLG10_001618;VLG5_001584;VLG5_001585;VLG4_001198;VLG12_000704;VLG10_001753;VLG5_001580;VLG5_001583	2.18991
GO:0031978	plastid thylakoid lumen	CC	17/3560	19/24793	17/19	Leaf_vs_Root	1.69209e-05	0.00146582	VLG5_001586;VLG5_001226;VLG12_002181;VLG3_000833;VLG5_001582;VLG10_000640;VLG1_001804;VLG8_002114;VLG11_000413;VLG10_001618;VLG5_001584;VLG5_001585;VLG4_001198;VLG12_000704;VLG10_001753;VLG5_001580;VLG5_001583	2.18991
GO:0009505	plant-type cell wall	CC	169/3560	309/24793	169/309	Leaf_vs_Root	6.78184e-07	9.52147e-05	VLG8_001250;VLG9_000312;VLG2_000172;VLG2_000141;VLG10_001923;VLG10_000802;VLG8_001669;VLG4_000157;VLG1_001172;VLG6_000588;VLG10_000917;VLG6_001692;VLG4_000889;VLG2_000071;VLG7_001812;VLG4_001161;VLG10_000989;VLG10_000170;VLG5_001133;VLG5_000407;VLG8_000929;VLG12_000337;VLG7_000591;VLG1_002327;VLG6_001591;VLG7_001665;VLG1_000054;VLG2_002296;VLG2_000669;VLG8_000227;VLG2_000133;VLG12_001704;VLG7_001…	1.34539
GO:0005576	extracellular region	CC	242/3560	460/24793	242/460	Leaf_vs_Root	2.30198e-07	3.40819e-05	VLG6_001241;VLG1_001304;VLG7_001180;VLG7_000862;VLG9_000791;VLG8_001250;VLG1_000975;VLG11_000433;VLG9_000277;VLG1_000429;VLG11_001469;VLG10_001923;VLG7_001330;VLG5_000747;VLG8_001669;VLG1_001172;VLG11_000442;VLG1_001634;VLG4_000025;VLG10_000917;VLG6_001692;VLG5_001184;VLG5_001196;VLG12_002182;VLG12_000157;VLG2_001759;VLG12_001428;VLG9_001665;VLG6_000164;VLG9_000280;VLG1_001946;VLG11_000313;VLG12_…	1.29675
GO:0005871	kinesin complex	CC	45/3560	60/24793	45/60	Leaf_vs_Root	9.16803e-08	1.43568e-05	VLG2_000685;VLG9_000494;VLG2_000179;VLG8_001892;VLG1_001360;VLG1_001484;VLG7_001317;VLG6_000608;VLG1_001860;VLG9_000496;VLG2_000137;VLG9_001020;VLG3_001161;VLG6_000303;VLG12_000790;VLG8_002189;VLG1_001148;VLG6_001270;VLG5_001354;VLG2_000167;VLG2_001234;VLG3_001068;VLG11_000772;VLG8_000019;VLG1_001724;VLG6_001398;VLG6_000056;VLG8_000074;VLG12_001763;VLG6_001518;VLG7_000531;VLG2_000146;VLG2_000175;…	1.83925
GO:0046658	obsolete anchored component of plasma membrane	CC	70/3560	103/24793	70/103	Leaf_vs_Root	2.80415e-08	4.8543e-06	VLG7_000266;VLG12_000290;VLG11_000671;VLG11_000214;VLG8_000260;VLG6_001023;VLG2_002254;VLG1_000644;VLG3_000921;VLG8_001388;VLG2_001836;VLG5_001039;VLG11_001849;VLG12_002161;VLG12_001710;VLG2_000954;VLG7_001595;VLG11_001867;VLG1_000202;VLG11_000880;VLG12_000980;VLG9_000608;VLG10_000189;VLG1_000768;VLG10_000989;VLG6_001772;VLG1_000053;VLG7_001895;VLG9_000983;VLG9_001139;VLG2_000746;VLG8_002310;VLG1…	1.66831
GO:0031225	obsolete anchored component of membrane	CC	87/3560	132/24793	87/132	Leaf_vs_Root	6.12105e-09	1.24609e-06	VLG2_001029;VLG7_001595;VLG1_000202;VLG9_000608;VLG10_000989;VLG10_001730;VLG12_000981;VLG7_000501;VLG12_000010;VLG1_000052;VLG10_000015;VLG11_000185;VLG12_001167;VLG6_001680;VLG4_001522;VLG12_000290;VLG11_000671;VLG8_000260;VLG6_001023;VLG2_002254;VLG1_000644;VLG3_000921;VLG11_001849;VLG10_000189;VLG10_001660;VLG1_000053;VLG7_001895;VLG12_001277;VLG6_000976;VLG12_002353;VLG2_000399;VLG6_002007;V…	1.61908
GO:0044459	obsolete plasma membrane part	CC	230/3560	420/24793	230/420	Leaf_vs_Root	5.8019e-09	1.21141e-06	VLG6_000914;VLG1_000246;VLG3_000749;VLG4_000956;VLG2_000717;VLG11_000337;VLG1_002154;VLG7_001330;VLG1_000630;VLG7_001595;VLG6_001678;VLG1_000202;VLG5_002241;VLG1_001854;VLG9_000608;VLG3_000318;VLG11_001856;VLG6_000645;VLG10_000989;VLG9_001737;VLG11_000780;VLG2_000938;VLG10_001730;VLG12_000981;VLG9_000231;VLG3_000510;VLG12_000583;VLG7_000501;VLG2_000716;VLG2_000852;VLG4_000592;VLG2_001746;VLG8_000…	1.35101
GO:0031226	obsolete intrinsic component of plasma membrane	CC	184/3560	318/24793	184/318	Leaf_vs_Root	7.10363e-10	1.92816e-07	VLG6_000914;VLG1_000246;VLG3_000749;VLG2_000717;VLG11_000337;VLG1_002154;VLG7_001330;VLG1_000630;VLG7_001595;VLG6_001678;VLG1_000202;VLG5_002241;VLG9_000608;VLG11_001856;VLG6_000645;VLG10_000989;VLG9_001737;VLG2_000938;VLG10_001730;VLG12_000981;VLG9_000231;VLG7_000501;VLG2_000716;VLG8_000509;VLG4_000941;VLG8_001457;VLG2_001451;VLG10_000155;VLG1_000052;VLG8_000511;VLG5_000421;VLG5_001246;VLG11_000…	1.42637
GO:0005875	microtubule associated complex	CC	60/3560	80/24793	60/80	Leaf_vs_Root	6.53418e-10	1.83475e-07	VLG2_000685;VLG1_001155;VLG9_000494;VLG2_000179;VLG1_001360;VLG8_001892;VLG1_001484;VLG3_000726;VLG7_001317;VLG6_000608;VLG1_001139;VLG6_001386;VLG1_001860;VLG9_000496;VLG2_000137;VLG4_000294;VLG8_000775;VLG9_001020;VLG3_001161;VLG6_000303;VLG12_000790;VLG8_002189;VLG1_001148;VLG7_001874;VLG6_001270;VLG2_001234;VLG5_001354;VLG2_000167;VLG3_001068;VLG8_001265;VLG5_000957;VLG5_001403;VLG11_000772;V…	1.84049
GO:0005886	plasma membrane	CC	1172/3560	2518/24793	1172/2518	Leaf_vs_Root	2.35145e-10	7.0918e-08	VLG6_000914;VLG7_001180;VLG5_001644;VLG3_000270;VLG11_000811;VLG12_000814;VLG10_001453;VLG12_000270;VLG1_002154;VLG11_000207;VLG2_000788;VLG3_000726;VLG6_001443;VLG1_001888;VLG2_001938;VLG7_001790;VLG10_000917;VLG1_000630;VLG8_000354;VLG1_000202;VLG11_001168;VLG2_000071;VLG9_001213;VLG5_002241;VLG5_000660;VLG5_001867;VLG5_000677;VLG11_001856;VLG10_000989;VLG5_001462;VLG6_000610;VLG5_000676;VLG5_0…	1.17403
GO:0016020	membrane	CC	1891/3560	4191/24793	1891/4191	Leaf_vs_Root	2.8943e-11	1.02471e-08	VLG10_000459;VLG7_000173;VLG6_000914;VLG5_001644;VLG3_000270;VLG11_000811;VLG11_000948;VLG11_000377;VLG2_000788;VLG1_001888;VLG1_000202;VLG2_000071;VLG8_001768;VLG8_000912;VLG6_000610;VLG5_000445;VLG11_000203;VLG2_000938;VLG11_001442;VLG3_000653;VLG1_002168;VLG1_000071;VLG9_000488;VLG4_000490;VLG10_001741;VLG10_001060;VLG8_000692;VLG8_001955;VLG5_001689;VLG9_000940;VLG5_000638;VLG1_001155;VLG5_00…	1.1578
GO:0071944	cell periphery	CC	1366/3560	2949/24793	1366/2949	Leaf_vs_Root	1.82861e-11	6.76834e-09	VLG6_000914;VLG5_001644;VLG3_000270;VLG11_000811;VLG2_000788;VLG1_001888;VLG10_000802;VLG1_000202;VLG2_000071;VLG4_001161;VLG6_000610;VLG5_000445;VLG11_000203;VLG2_000938;VLG11_001442;VLG1_000071;VLG10_001741;VLG10_001060;VLG5_001689;VLG5_000638;VLG1_001155;VLG11_001849;VLG1_000608;VLG12_001694;VLG12_001251;VLG9_000262;VLG12_000120;VLG2_001621;VLG12_000757;VLG3_001606;VLG10_000196;VLG7_000611;VLG…	1.17559
GO:0010287	plastoglobule	CC	47/3560	55/24793	47/55	Leaf_vs_Root	1.2195e-11	4.72874e-09	VLG2_000683;VLG10_000459;VLG19_000005;VLG10_000349;VLG2_002208;VLG12_001513;VLG5_000967;VLG5_002237;VLG4_001519;VLG1_001955;VLG6_000711;VLG3_000421;VLG5_000588;VLG1_001837;VLG5_002179;VLG1_001942;VLG2_002221;VLG1_000806;VLG2_002211;VLG2_000498;VLG2_001370;VLG8_000196;VLG12_002182;VLG12_001396;VLG10_000406;VLG8_001717;VLG1_001271;VLG11_001420;VLG11_001727;VLG2_002204;VLG3_000212;VLG3_000406;VLG4_0…	2.09476
GO:0048046	apoplast	CC	159/3560	253/24793	159/253	Leaf_vs_Root	1.4216e-12	5.78806e-10	VLG6_001241;VLG7_000862;VLG7_001180;VLG1_000975;VLG8_001250;VLG9_000277;VLG1_000429;VLG11_001469;VLG10_001923;VLG1_001634;VLG10_000917;VLG6_001692;VLG5_001196;VLG12_002182;VLG9_001665;VLG6_000164;VLG9_000280;VLG11_000313;VLG12_000981;VLG5_000407;VLG6_001770;VLG7_000501;VLG7_000591;VLG9_001452;VLG6_001892;VLG3_001566;VLG7_000437;VLG8_000528;VLG1_000430;VLG1_000434;VLG1_000052;VLG7_000043;VLG7_0008…	1.54971
GO:0031977	thylakoid lumen	CC	50/3560	58/24793	50/58	Leaf_vs_Root	1.29904e-12	5.56742e-10	VLG8_000169;VLG5_001226;VLG12_001545;VLG5_000690;VLG12_002181;VLG1_001851;VLG5_001233;VLG12_001600;VLG5_001747;VLG5_000321;VLG1_001253;VLG6_000229;VLG8_002210;VLG5_001584;VLG11_000377;VLG8_002038;VLG1_000297;VLG5_002179;VLG6_001459;VLG6_001122;VLG5_001586;VLG1_001338;VLG9_001400;VLG8_000210;VLG3_000833;VLG1_001245;VLG8_002114;VLG8_002037;VLG11_000413;VLG7_000292;VLG5_001585;VLG5_001580;VLG1_00122…	2.1136
GO:0009526	plastid envelope	CC	284/3560	484/24793	284/484	Leaf_vs_Root	1.26165e-15	5.70757e-13	VLG10_000459;VLG12_001408;VLG6_001154;VLG4_000655;VLG1_000975;VLG8_002200;VLG7_001633;VLG11_000948;VLG12_001073;VLG8_002184;VLG11_001469;VLG6_001048;VLG2_000935;VLG9_001633;VLG4_000101;VLG1_001211;VLG4_000416;VLG5_001887;VLG12_002049;VLG2_000754;VLG10_000022;VLG5_001196;VLG12_002182;VLG11_000152;VLG8_001717;VLG1_000809;VLG11_000780;VLG10_000530;VLG7_001546;VLG8_001816;VLG10_000011;VLG1_001222;VLG…	1.45569
GO:0009941	chloroplast envelope	CC	277/3560	461/24793	277/461	Leaf_vs_Root	3.94726e-17	1.89074e-14	VLG10_000459;VLG12_001408;VLG6_001154;VLG4_000655;VLG1_000975;VLG8_002200;VLG7_001633;VLG11_000948;VLG12_001073;VLG8_002184;VLG11_001469;VLG6_001048;VLG2_000935;VLG9_001633;VLG4_000101;VLG1_001211;VLG4_000416;VLG5_001887;VLG12_002049;VLG2_000754;VLG10_000022;VLG5_001196;VLG12_002182;VLG11_000152;VLG8_001717;VLG1_000809;VLG11_000780;VLG10_000530;VLG7_001546;VLG8_001816;VLG10_000011;VLG1_001222;VLG…	1.49134
GO:0009570	chloroplast stroma	CC	334/3560	559/24793	334/559	Leaf_vs_Root	6.55681e-20	3.81372e-17	VLG10_000459;VLG11_000738;VLG7_000862;VLG7_001180;VLG12_001687;VLG9_000378;VLG11_000976;VLG4_000725;VLG8_001717;VLG10_000011;VLG2_000450;VLG7_001655;VLG10_000129;VLG7_000437;VLG5_001928;VLG5_001505;VLG9_000488;VLG8_000151;VLG7_000530;VLG12_000385;VLG2_002235;VLG1_001340;VLG7_001201;VLG1_000924;VLG11_000360;VLG5_002237;VLG4_001519;VLG6_000711;VLG5_002022;VLG1_001338;VLG1_001425;VLG1_000238;VLG7_00…	1.48825
GO:0009532	plastid stroma	CC	340/3560	568/24793	340/568	Leaf_vs_Root	1.96134e-20	1.22856e-17	VLG10_000459;VLG11_000738;VLG7_000862;VLG7_001180;VLG12_001687;VLG9_000378;VLG11_000976;VLG4_000725;VLG8_001717;VLG5_000984;VLG10_000011;VLG2_000450;VLG7_001655;VLG10_000129;VLG7_000437;VLG5_001928;VLG5_001505;VLG9_000488;VLG8_000151;VLG7_000530;VLG12_000385;VLG2_002235;VLG1_001340;VLG7_001201;VLG1_000924;VLG11_000360;VLG5_002237;VLG4_001519;VLG6_000711;VLG5_002022;VLG1_001338;VLG1_001425;VLG1_00…	1.49171
GO:0009536	plastid	CC	902/3560	1734/24793	902/1734	Leaf_vs_Root	1.91497e-23	1.29947e-20	VLG10_000459;VLG11_000738;VLG1_000515;VLG7_000862;VLG7_001180;VLG12_001687;VLG11_000948;VLG12_001600;VLG3_000709;VLG11_000377;VLG9_000378;VLG8_000610;VLG11_000569;VLG10_001072;VLG12_000873;VLG11_000976;VLG5_001364;VLG8_000354;VLG10_000022;VLG4_000725;VLG8_000912;VLG10_001848;VLG8_001717;VLG1_000809;VLG8_001872;VLG12_000199;VLG10_000530;VLG10_000011;VLG5_000984;VLG2_000450;VLG7_001655;VLG7_001576;…	1.32496
GO:0009507	chloroplast	CC	883/3560	1673/24793	883/1673	Leaf_vs_Root	1.60265e-25	1.1864e-22	VLG10_000459;VLG11_000738;VLG1_000515;VLG7_000862;VLG7_001180;VLG12_001687;VLG11_000948;VLG12_001600;VLG3_000709;VLG11_000377;VLG9_000378;VLG8_000610;VLG11_000569;VLG10_001072;VLG12_000873;VLG11_000976;VLG5_001364;VLG8_000354;VLG10_000022;VLG4_000725;VLG8_000912;VLG10_001848;VLG8_001717;VLG1_000809;VLG8_001872;VLG12_000199;VLG10_000530;VLG10_000011;VLG5_000984;VLG2_000450;VLG7_001655;VLG7_001576;…	1.34593
GO:0044435	obsolete plastid part	CC	590/3560	996/24793	590/996	Leaf_vs_Root	1.49656e-33	1.21865e-30	VLG10_000459;VLG11_000738;VLG7_000862;VLG7_001180;VLG12_001687;VLG11_000948;VLG3_000709;VLG9_000378;VLG11_000377;VLG11_000976;VLG5_001364;VLG4_000725;VLG10_000022;VLG8_000912;VLG8_001717;VLG1_000809;VLG10_000530;VLG10_000011;VLG5_000984;VLG2_000450;VLG7_001655;VLG10_000129;VLG1_002168;VLG7_000437;VLG5_001928;VLG2_000419;VLG5_001505;VLG9_000488;VLG4_000490;VLG12_001299;VLG8_000151;VLG7_000530;VLG1…	1.5015
GO:0044434	obsolete chloroplast part	CC	582/3560	977/24793	582/977	Leaf_vs_Root	4.86296e-34	4.39989e-31	VLG10_000459;VLG11_000738;VLG7_000862;VLG7_001180;VLG12_001687;VLG11_000948;VLG3_000709;VLG9_000378;VLG11_000377;VLG11_000976;VLG5_001364;VLG4_000725;VLG10_000022;VLG8_000912;VLG8_001717;VLG1_000809;VLG10_000530;VLG10_000011;VLG5_000984;VLG2_000450;VLG7_001655;VLG10_000129;VLG1_002168;VLG7_000437;VLG5_001928;VLG2_000419;VLG5_001505;VLG9_000488;VLG4_000490;VLG12_001299;VLG8_000151;VLG7_000530;VLG1…	1.50978
GO:0009535	chloroplast thylakoid membrane	CC	189/3560	236/24793	189/236	Leaf_vs_Root	3.70981e-35	3.77612e-32	VLG10_000459;VLG19_000005;VLG6_001154;VLG8_001048;VLG12_001545;VLG9_000591;VLG5_000228;VLG4_000956;VLG3_000709;VLG9_000378;VLG11_000377;VLG8_001527;VLG12_000413;VLG3_000421;VLG1_000297;VLG2_000754;VLG5_001364;VLG8_000210;VLG11_001177;VLG8_000912;VLG8_001717;VLG11_000780;VLG5_000984;VLG10_000011;VLG1_001492;VLG1_001222;VLG7_000127;VLG2_000752;VLG1_002168;VLG24_000014;VLG2_000923;VLG8_000306;VLG19_…	1.98841
GO:0034357	photosynthetic membrane	CC	199/3560	252/24793	199/252	Leaf_vs_Root	2.44147e-35	2.84012e-32	VLG10_000459;VLG19_000005;VLG6_001154;VLG8_001048;VLG12_001545;VLG9_000591;VLG5_000228;VLG4_000956;VLG3_000709;VLG9_000378;VLG11_000377;VLG8_001527;VLG12_000413;VLG3_000421;VLG1_000297;VLG2_000754;VLG5_001364;VLG8_000210;VLG11_001177;VLG8_000912;VLG8_001717;VLG11_000780;VLG8_000121;VLG5_000984;VLG10_000011;VLG1_001492;VLG1_001222;VLG7_000127;VLG2_000752;VLG1_002168;VLG24_000014;VLG2_000923;VLG8_0…	1.96211
GO:0042651	thylakoid membrane	CC	199/3560	252/24793	199/252	Leaf_vs_Root	2.44147e-35	2.84012e-32	VLG10_000459;VLG19_000005;VLG6_001154;VLG8_001048;VLG12_001545;VLG9_000591;VLG5_000228;VLG4_000956;VLG3_000709;VLG9_000378;VLG11_000377;VLG8_001527;VLG12_000413;VLG3_000421;VLG1_000297;VLG2_000754;VLG5_001364;VLG8_000210;VLG11_001177;VLG8_000912;VLG8_001717;VLG11_000780;VLG8_000121;VLG5_000984;VLG10_000011;VLG1_001492;VLG1_001222;VLG7_000127;VLG2_000752;VLG1_002168;VLG24_000014;VLG2_000923;VLG8_0…	1.96211
GO:0055035	plastid thylakoid membrane	CC	192/3560	240/24793	192/240	Leaf_vs_Root	1.40311e-35	2.2851e-32	VLG10_000459;VLG19_000005;VLG6_001154;VLG8_001048;VLG12_001545;VLG9_000591;VLG5_000228;VLG4_000956;VLG3_000709;VLG9_000378;VLG11_000377;VLG8_001527;VLG12_000413;VLG3_000421;VLG1_000297;VLG2_000754;VLG5_001364;VLG8_000210;VLG11_001177;VLG8_000912;VLG8_001717;VLG11_000780;VLG5_000984;VLG10_000011;VLG1_001492;VLG1_001222;VLG7_000127;VLG2_000752;VLG1_002168;VLG24_000014;VLG2_000923;VLG8_000306;VLG19_…	1.98685
GO:0044436	obsolete thylakoid part	CC	223/3560	280/24793	223/280	Leaf_vs_Root	1.35118e-40	2.75067e-37	VLG10_000459;VLG19_000005;VLG6_001154;VLG8_001048;VLG12_001545;VLG9_000591;VLG5_000228;VLG4_000956;VLG12_001600;VLG3_000709;VLG9_000378;VLG11_000377;VLG8_001527;VLG12_000413;VLG3_000421;VLG1_000297;VLG2_000754;VLG5_001586;VLG5_001364;VLG8_000210;VLG3_000833;VLG11_001177;VLG8_000912;VLG8_001717;VLG8_002037;VLG11_000780;VLG7_000292;VLG8_000121;VLG5_000984;VLG10_000011;VLG1_001492;VLG1_001222;VLG7_0…	1.98391
GO:0009534	chloroplast thylakoid	CC	251/3560	322/24793	251/322	Leaf_vs_Root	1.57628e-42	4.27855e-39	VLG10_000459;VLG19_000005;VLG6_001154;VLG11_000676;VLG8_001048;VLG1_000975;VLG9_000591;VLG12_001545;VLG5_000228;VLG4_000956;VLG3_000709;VLG9_000378;VLG11_000377;VLG9_001633;VLG8_001527;VLG12_000413;VLG3_000421;VLG1_000297;VLG12_002049;VLG5_001586;VLG5_001364;VLG2_000754;VLG11_001177;VLG3_000833;VLG8_000210;VLG8_000912;VLG8_001717;VLG6_001553;VLG11_000780;VLG5_000984;VLG10_000011;VLG1_001492;VLG1_…	1.94619
GO:0031976	plastid thylakoid	CC	253/3560	324/24793	253/324	Leaf_vs_Root	4.14549e-43	1.68783e-39	VLG10_000459;VLG19_000005;VLG6_001154;VLG11_000676;VLG8_001048;VLG1_000975;VLG9_000591;VLG12_001545;VLG5_000228;VLG4_000956;VLG3_000709;VLG9_000378;VLG11_000377;VLG9_001633;VLG8_001527;VLG12_000413;VLG3_000421;VLG1_000297;VLG12_002049;VLG5_001586;VLG5_001364;VLG2_000754;VLG11_001177;VLG3_000833;VLG8_000210;VLG8_000912;VLG8_001717;VLG6_001553;VLG11_000780;VLG5_000984;VLG10_000011;VLG1_001492;VLG1_…	1.95006
GO:0009579	thylakoid	CC	305/3560	390/24793	305/390	Leaf_vs_Root	3.73779e-52	3.04368e-48	VLG10_000459;VLG19_000005;VLG6_001154;VLG11_000676;VLG8_001048;VLG1_000975;VLG9_000591;VLG8_002200;VLG12_001545;VLG5_000228;VLG4_000956;VLG12_001600;VLG3_000709;VLG11_000377;VLG9_000378;VLG11_001469;VLG9_001633;VLG8_001527;VLG12_000413;VLG3_000421;VLG1_001211;VLG1_000297;VLG12_002049;VLG5_001289;VLG5_001364;VLG5_001586;VLG2_000754;VLG4_000725;VLG11_001177;VLG3_000833;VLG8_000210;VLG8_000912;VLG8_…	1.96331
GO:0001134	obsolete transcription regulator recruiting activity	MF	48/3560	82/24793	48/82	Leaf_vs_Root	0.00101205	0.0484772	VLG3_000435;VLG5_000717;VLG10_001378;VLG7_001584;VLG10_000616;VLG11_001084;VLG3_000941;VLG10_000543;VLG12_002205;VLG6_001800;VLG8_001139;VLG10_000019;VLG9_001323;VLG8_001306;VLG12_001152;VLG10_000617;VLG1_000051;VLG1_000596;VLG11_000753;VLG5_002069;VLG1_000929;VLG1_002193;VLG1_000931;VLG10_000288;VLG3_001046;VLG8_001782;VLG5_000846;VLG6_001918;VLG1_001007;VLG7_001704;VLG1_002008;VLG8_001624;VLG11…	1.43601
GO:0001135	obsolete RNA polymerase II transcription regulator recruiting activity	MF	48/3560	82/24793	48/82	Leaf_vs_Root	0.00101205	0.0484772	VLG3_000435;VLG5_000717;VLG10_001378;VLG7_001584;VLG10_000616;VLG11_001084;VLG3_000941;VLG10_000543;VLG12_002205;VLG6_001800;VLG8_001139;VLG10_000019;VLG9_001323;VLG8_001306;VLG12_001152;VLG10_000617;VLG1_000051;VLG1_000596;VLG11_000753;VLG5_002069;VLG1_000929;VLG1_002193;VLG1_000931;VLG10_000288;VLG3_001046;VLG8_001782;VLG5_000846;VLG6_001918;VLG1_001007;VLG7_001704;VLG1_002008;VLG8_001624;VLG11…	1.43601
GO:0016413	O-acetyltransferase activity	MF	28/3560	42/24793	28/42	Leaf_vs_Root	0.000696883	0.0349649	VLG5_001499;VLG9_001126;VLG3_000257;VLG2_001642;VLG3_001428;VLG6_001254;VLG11_000019;VLG3_000209;VLG11_000550;VLG10_000309;VLG11_000534;VLG4_001301;VLG3_001431;VLG10_000307;VLG3_000258;VLG3_001433;VLG6_000906;VLG10_000664;VLG11_001913;VLG7_000612;VLG6_000671;VLG2_001114;VLG10_001281;VLG10_000308;VLG7_000573;VLG10_000720;VLG6_001942;VLG4_001357	1.63687
GO:0016757	glycosyltransferase activity	MF	192/3560	391/24793	192/391	Leaf_vs_Root	0.000650711	0.03375	VLG2_000244;VLG12_001182;VLG12_000939;VLG11_001484;VLG10_001710;VLG7_000326;VLG11_000692;VLG4_000262;VLG6_001817;VLG7_001198;VLG2_000250;VLG4_000461;VLG6_001207;VLG6_000222;VLG8_000354;VLG2_000234;VLG9_000253;VLG10_001848;VLG8_002084;VLG7_001509;VLG8_000168;VLG1_001423;VLG2_001759;VLG11_001845;VLG5_002117;VLG12_002294;VLG10_001456;VLG1_000536;VLG7_001655;VLG10_000148;VLG2_000867;VLG9_000254;VLG6_…	1.20536
GO:0016773	phosphotransferase activity, alcohol group as acceptor	MF	413/3560	892/24793	413/892	Leaf_vs_Root	0.000562271	0.0305238	VLG5_001644;VLG10_001076;VLG8_001597;VLG2_000788;VLG11_001242;VLG9_001213;VLG5_000660;VLG5_000677;VLG1_000537;VLG9_000419;VLG5_000676;VLG9_001159;VLG5_000445;VLG7_001221;VLG10_000923;VLG5_000514;VLG2_000450;VLG6_001826;VLG5_001656;VLG7_000768;VLG1_002267;VLG6_001759;VLG12_001313;VLG5_000638;VLG7_001431;VLG11_001760;VLG2_001858;VLG10_000599;VLG5_000181;VLG2_000796;VLG1_001297;VLG1_001558;VLG12_000…	1.1398
GO:0038023	signaling receptor activity	MF	147/3560	290/24793	147/290	Leaf_vs_Root	0.00049963	0.0278663	VLG11_000679;VLG2_000344;VLG2_000172;VLG2_000141;VLG2_000788;VLG2_000346;VLG4_000025;VLG2_001016;VLG9_001213;VLG9_000419;VLG3_001603;VLG7_001221;VLG10_000923;VLG2_002021;VLG4_000038;VLG4_001270;VLG1_000907;VLG12_000583;VLG1_000597;VLG1_001085;VLG12_000134;VLG6_000683;VLG8_002086;VLG11_000747;VLG8_001961;VLG5_000080;VLG5_001072;VLG2_002158;VLG7_000257;VLG4_000210;VLG6_000755;VLG5_000181;VLG1_00090…	1.24374
GO:0042887	amide transmembrane transporter activity	MF	37/3560	58/24793	37/58	Leaf_vs_Root	0.000384942	0.0222311	VLG1_000699;VLG12_000419;VLG6_001608;VLG9_001356;VLG12_000418;VLG2_000717;VLG11_000337;VLG2_001152;VLG11_000855;VLG12_000603;VLG10_000186;VLG4_000042;VLG7_001694;VLG1_000521;VLG11_000122;VLG6_000576;VLG11_000780;VLG5_001253;VLG11_001257;VLG3_001625;VLG2_000716;VLG6_001606;VLG10_000185;VLG9_000614;VLG6_001609;VLG8_001566;VLG10_000188;VLG6_001611;VLG11_000124;VLG12_000871;VLG10_000183;VLG5_000421;V…	1.56546
GO:0008194	UDP-glycosyltransferase activity	MF	136/3560	264/24793	136/264	Leaf_vs_Root	0.000333548	0.0195402	VLG2_000244;VLG11_001484;VLG12_000939;VLG10_001710;VLG7_000326;VLG6_001817;VLG7_001198;VLG2_000250;VLG4_000461;VLG6_001207;VLG2_000234;VLG9_000253;VLG8_002084;VLG8_000168;VLG7_001509;VLG1_001423;VLG12_002294;VLG1_000536;VLG10_000148;VLG9_000254;VLG6_000988;VLG5_000541;VLG11_000807;VLG8_001405;VLG2_000249;VLG9_000869;VLG8_001230;VLG11_001487;VLG5_001158;VLG12_001932;VLG8_001296;VLG11_000368;VLG12_…	1.26403
GO:0004888	transmembrane signaling receptor activity	MF	132/3560	255/24793	132/255	Leaf_vs_Root	0.000311248	0.0183659	VLG11_000679;VLG2_000172;VLG2_000141;VLG2_000788;VLG2_001016;VLG4_000025;VLG9_001213;VLG9_000419;VLG3_001603;VLG7_001221;VLG10_000923;VLG4_001270;VLG4_000038;VLG1_000907;VLG1_001085;VLG6_000683;VLG8_002086;VLG11_000747;VLG5_000080;VLG5_001072;VLG2_002158;VLG7_000257;VLG4_000210;VLG6_000755;VLG5_000181;VLG1_000905;VLG2_000796;VLG1_000899;VLG2_000070;VLG3_000154;VLG1_000887;VLG7_001895;VLG1_001240;…	1.27013
GO:0060089	molecular transducer activity	MF	159/3560	313/24793	159/313	Leaf_vs_Root	0.000264535	0.0160754	VLG11_000679;VLG2_000344;VLG2_000172;VLG2_000141;VLG2_000788;VLG2_000346;VLG2_001016;VLG4_000025;VLG10_001673;VLG9_001213;VLG9_000419;VLG7_001221;VLG10_000923;VLG3_001603;VLG1_002173;VLG4_001270;VLG2_002021;VLG4_000038;VLG1_000907;VLG12_000583;VLG1_000597;VLG1_001085;VLG12_000134;VLG6_000683;VLG11_001886;VLG8_002086;VLG11_000747;VLG8_001961;VLG5_000080;VLG5_001072;VLG2_002158;VLG7_000257;VLG4_000…	1.24692
GO:0022857	transmembrane transporter activity	MF	381/3560	811/24793	381/811	Leaf_vs_Root	0.000237713	0.0145541	VLG6_000914;VLG11_000811;VLG9_001356;VLG12_000814;VLG11_000948;VLG2_000829;VLG1_001888;VLG6_001915;VLG1_000630;VLG5_002241;VLG8_001768;VLG2_000984;VLG2_000938;VLG1_000430;VLG5_000867;VLG7_000238;VLG5_000421;VLG10_000765;VLG5_001246;VLG4_001471;VLG5_001325;VLG5_001857;VLG4_001479;VLG7_001515;VLG12_001694;VLG1_000475;VLG1_002302;VLG8_000891;VLG1_000887;VLG12_000757;VLG6_001168;VLG1_001240;VLG10_001…	1.15678
GO:0004672	protein kinase activity	MF	375/3560	795/24793	375/795	Leaf_vs_Root	0.000179606	0.0116074	VLG5_001644;VLG10_001076;VLG8_001597;VLG2_000788;VLG11_001242;VLG9_001213;VLG5_000660;VLG5_000677;VLG1_000537;VLG9_000419;VLG5_000676;VLG9_001159;VLG5_000445;VLG7_001221;VLG10_000923;VLG5_000514;VLG6_001826;VLG5_001656;VLG1_002267;VLG6_001759;VLG12_001313;VLG5_000638;VLG7_001431;VLG11_001760;VLG2_001858;VLG10_000599;VLG5_000181;VLG2_000796;VLG1_001297;VLG1_001558;VLG1_002297;VLG5_001631;VLG3_0016…	1.16162
GO:0035251	UDP-glucosyltransferase activity	MF	113/3560	211/24793	113/211	Leaf_vs_Root	0.000146967	0.00965119	VLG2_000244;VLG11_001484;VLG10_001710;VLG7_000326;VLG6_001817;VLG7_001198;VLG2_000250;VLG4_000461;VLG6_001207;VLG2_000234;VLG9_000253;VLG7_001509;VLG1_001423;VLG12_002294;VLG1_000536;VLG10_000148;VLG9_000254;VLG6_000988;VLG5_000541;VLG11_000807;VLG8_001405;VLG2_000249;VLG8_001230;VLG11_001487;VLG5_001158;VLG12_001932;VLG8_001296;VLG11_000368;VLG12_001933;VLG7_001498;VLG11_000369;VLG11_000806;VLG1…	1.31407
GO:0005516	calmodulin binding	MF	101/3560	185/24793	101/185	Leaf_vs_Root	0.000124509	0.00837915	VLG5_001644;VLG3_000718;VLG12_001211;VLG10_001389;VLG6_001678;VLG5_002014;VLG4_001100;VLG10_000595;VLG10_001096;VLG7_001235;VLG6_000622;VLG10_000692;VLG5_001656;VLG10_000596;VLG5_001642;VLG8_001184;VLG10_001390;VLG6_001759;VLG5_002012;VLG6_001779;VLG12_001313;VLG9_000268;VLG5_001645;VLG4_001106;VLG12_001314;VLG7_001833;VLG8_000678;VLG10_000599;VLG7_000237;VLG1_002297;VLG2_001392;VLG7_001753;VLG5_…	1.33947
GO:0080043	quercetin 3-O-glucosyltransferase activity	MF	93/3560	168/24793	93/168	Leaf_vs_Root	0.000116193	0.0079509	VLG2_000244;VLG11_001484;VLG10_001710;VLG7_000326;VLG6_001817;VLG7_001198;VLG2_000250;VLG6_001207;VLG2_000234;VLG9_000253;VLG7_001509;VLG12_002294;VLG1_000536;VLG10_000148;VLG9_000254;VLG11_000807;VLG8_001405;VLG2_000249;VLG11_001487;VLG5_001158;VLG12_001932;VLG8_001296;VLG12_001933;VLG7_001498;VLG11_000806;VLG11_000451;VLG6_000797;VLG12_000688;VLG7_001977;VLG2_000248;VLG2_000253;VLG9_000250;VLG2…	1.3581
GO:0080044	quercetin 7-O-glucosyltransferase activity	MF	93/3560	168/24793	93/168	Leaf_vs_Root	0.000116193	0.0079509	VLG2_000244;VLG11_001484;VLG10_001710;VLG7_000326;VLG6_001817;VLG7_001198;VLG2_000250;VLG6_001207;VLG2_000234;VLG9_000253;VLG7_001509;VLG12_002294;VLG1_000536;VLG10_000148;VLG9_000254;VLG11_000807;VLG8_001405;VLG2_000249;VLG11_001487;VLG5_001158;VLG12_001932;VLG8_001296;VLG12_001933;VLG7_001498;VLG11_000806;VLG11_000451;VLG6_000797;VLG12_000688;VLG7_001977;VLG2_000248;VLG2_000253;VLG9_000250;VLG2…	1.3581
GO:0030761	8-hydroxyquercitin 8-O-methyltransferase activity	MF	16/3560	18/24793	16/18	Leaf_vs_Root	3.71088e-05	0.00296252	VLG10_001213;VLG10_000959;VLG10_000727;VLG10_001208;VLG9_001419;VLG10_000739;VLG10_001215;VLG10_000729;VLG10_001321;VLG10_000728;VLG10_001205;VLG10_000741;VLG2_000090;VLG2_000091;VLG10_001203;VLG10_001207	2.17612
GO:0016759	cellulose synthase activity	MF	26/3560	34/24793	26/34	Leaf_vs_Root	2.85513e-05	0.00230191	VLG2_000865;VLG8_000354;VLG5_002125;VLG2_000864;VLG3_000854;VLG2_000868;VLG10_001454;VLG8_000035;VLG5_002117;VLG10_001456;VLG2_000867;VLG5_000475;VLG8_000036;VLG10_001455;VLG1_000282;VLG5_002118;VLG3_000855;VLG10_001457;VLG5_002124;VLG5_002119;VLG5_002115;VLG2_000866;VLG1_002317;VLG5_002120;VLG8_001429;VLG5_002116	1.8754
GO:0010290	chlorophyll catabolite transmembrane transporter activity	MF	19/3560	22/24793	19/22	Leaf_vs_Root	1.55408e-05	0.00137553	VLG4_001471;VLG4_001472;VLG8_000060;VLG1_000437;VLG1_000429;VLG4_000105;VLG4_001473;VLG8_000065;VLG1_000428;VLG1_000427;VLG8_000064;VLG1_000436;VLG1_000430;VLG1_000434;VLG1_000431;VLG1_000435;VLG8_000062;VLG1_000432;VLG4_000104	2.11515
GO:0015431	ABC-type glutathione S-conjugate transporter activity	MF	19/3560	22/24793	19/22	Leaf_vs_Root	1.55408e-05	0.00137553	VLG4_001471;VLG4_001472;VLG8_000060;VLG1_000437;VLG1_000429;VLG4_000105;VLG4_001473;VLG8_000065;VLG1_000428;VLG1_000427;VLG8_000064;VLG1_000436;VLG1_000430;VLG1_000434;VLG1_000431;VLG1_000435;VLG8_000062;VLG1_000432;VLG4_000104	2.11515
GO:0016758	hexosyltransferase activity	MF	185/3560	355/24793	185/355	Leaf_vs_Root	1.28925e-05	0.00122074	VLG2_000244;VLG12_001182;VLG11_001484;VLG10_001710;VLG7_000326;VLG11_000692;VLG4_000262;VLG6_001817;VLG7_001198;VLG2_000250;VLG4_000461;VLG6_001207;VLG6_000222;VLG8_000354;VLG2_000234;VLG9_000253;VLG10_001848;VLG7_001509;VLG8_000168;VLG1_001423;VLG11_001845;VLG5_002117;VLG12_002294;VLG10_001456;VLG1_000536;VLG7_001655;VLG10_000148;VLG2_000867;VLG9_000254;VLG6_001843;VLG6_000988;VLG3_001802;VLG5_0…	1.28116
GO:0016168	chlorophyll binding	MF	14/3560	14/24793	14/14	Leaf_vs_Root	3.82098e-06	0.000441739	VLG10_000459;VLG6_000208;VLG5_000588;VLG2_000498;VLG10_000406;VLG8_000196;VLG2_002118;VLG4_001519;VLG8_001717;VLG6_000711;VLG6_001003;VLG11_001420;VLG5_001725;VLG11_001727	2.43972
GO:0015926	glucosidase activity	MF	72/3560	116/24793	72/116	Leaf_vs_Root	3.67623e-06	0.000433848	VLG5_001700;VLG5_002025;VLG5_000278;VLG7_000946;VLG5_000288;VLG5_000276;VLG6_001023;VLG2_001282;VLG2_001274;VLG12_001319;VLG12_000328;VLG7_001482;VLG5_000284;VLG12_001323;VLG5_001039;VLG11_001849;VLG5_000289;VLG5_001702;VLG7_000948;VLG2_000155;VLG12_000173;VLG2_001279;VLG12_001318;VLG4_000889;VLG12_001321;VLG5_000283;VLG5_001706;VLG12_001328;VLG2_001278;VLG12_000416;VLG12_000417;VLG9_000932;VLG5_…	1.52319
GO:0016798	hydrolase activity, acting on glycosyl bonds	MF	154/3560	283/24793	154/283	Leaf_vs_Root	3.09733e-06	0.000382144	VLG5_000278;VLG9_000791;VLG8_001250;VLG7_000212;VLG2_001282;VLG9_000312;VLG7_001482;VLG5_001702;VLG4_000157;VLG12_002093;VLG4_000889;VLG5_001225;VLG5_001706;VLG12_001328;VLG4_001161;VLG6_000633;VLG5_000290;VLG12_001325;VLG5_000287;VLG5_001701;VLG12_000981;VLG1_000689;VLG12_000337;VLG8_002008;VLG5_002030;VLG7_000501;VLG2_000669;VLG12_002144;VLG12_001322;VLG1_000620;VLG12_000011;VLG5_001711;VLG7_00…	1.3376
GO:0003774	cytoskeletal motor activity	MF	48/3560	70/24793	48/70	Leaf_vs_Root	2.85153e-06	0.000357231	VLG8_002156;VLG12_001072;VLG2_000685;VLG9_000494;VLG2_000179;VLG1_001360;VLG8_001892;VLG1_001484;VLG7_001317;VLG6_000608;VLG1_001860;VLG9_000496;VLG2_000137;VLG9_001020;VLG3_001161;VLG6_000303;VLG12_000790;VLG8_002189;VLG1_001148;VLG6_001270;VLG5_001354;VLG2_000167;VLG2_001234;VLG3_001068;VLG11_000772;VLG8_000019;VLG1_001724;VLG6_001398;VLG6_000056;VLG8_000074;VLG12_001763;VLG6_001518;VLG7_000531…	1.68207
GO:0008422	beta-glucosidase activity	MF	69/3560	107/24793	69/107	Leaf_vs_Root	7.75337e-07	0.000105226	VLG5_001700;VLG5_002025;VLG5_000278;VLG7_000946;VLG5_000288;VLG5_000276;VLG6_001023;VLG2_001282;VLG2_001274;VLG12_001319;VLG12_000328;VLG7_001482;VLG5_000284;VLG12_001323;VLG5_001039;VLG11_001849;VLG5_000289;VLG5_001702;VLG7_000948;VLG2_000155;VLG12_001318;VLG2_001279;VLG4_000889;VLG12_001321;VLG5_000283;VLG5_001706;VLG12_001328;VLG2_001278;VLG12_000416;VLG12_000417;VLG5_000290;VLG12_001325;VLG5_…	1.58262
GO:0046527	glucosyltransferase activity	MF	145/3560	259/24793	145/259	Leaf_vs_Root	6.98964e-07	9.64689e-05	VLG2_000244;VLG12_001182;VLG11_001484;VLG10_001710;VLG7_000326;VLG6_001817;VLG7_001198;VLG2_000250;VLG4_000461;VLG6_001207;VLG8_000354;VLG2_000234;VLG9_000253;VLG7_001509;VLG1_001423;VLG5_002117;VLG12_002294;VLG10_001456;VLG1_000536;VLG10_000148;VLG2_000867;VLG9_000254;VLG6_000988;VLG5_000541;VLG11_000807;VLG8_001405;VLG2_000249;VLG6_001130;VLG8_001230;VLG5_002124;VLG11_001487;VLG5_001158;VLG1_00…	1.3764
GO:0016705	oxidoreductase activity, acting on paired donors, with incorporation or reduction of molecular oxygen	MF	134/3560	231/24793	134/231	Leaf_vs_Root	1.18444e-07	1.78609e-05	VLG6_001378;VLG8_001919;VLG6_001948;VLG5_001328;VLG1_000308;VLG10_001782;VLG6_001708;VLG7_000511;VLG3_001110;VLG7_000188;VLG6_000473;VLG3_001330;VLG1_000809;VLG6_000593;VLG3_001152;VLG5_000042;VLG3_001150;VLG3_001424;VLG3_001064;VLG6_001337;VLG8_000690;VLG8_001364;VLG3_001147;VLG6_001704;VLG1_001445;VLG8_001445;VLG3_000665;VLG3_001111;VLG1_001444;VLG10_000877;VLG3_000654;VLG6_001379;VLG3_001142;V…	1.42635
GO:0003777	microtubule motor activity	MF	45/3560	60/24793	45/60	Leaf_vs_Root	9.16803e-08	1.43568e-05	VLG2_000685;VLG9_000494;VLG2_000179;VLG8_001892;VLG1_001360;VLG1_001484;VLG7_001317;VLG6_000608;VLG1_001860;VLG9_000496;VLG2_000137;VLG9_001020;VLG3_001161;VLG6_000303;VLG12_000790;VLG8_002189;VLG1_001148;VLG6_001270;VLG5_001354;VLG2_000167;VLG2_001234;VLG3_001068;VLG11_000772;VLG8_000019;VLG1_001724;VLG6_001398;VLG6_000056;VLG8_000074;VLG12_001763;VLG6_001518;VLG7_000531;VLG2_000146;VLG2_000175;…	1.83925
GO:0016709	oxidoreductase activity, acting on paired donors, with incorporation or reduction of molecular oxygen, NAD(P)H as one donor, and incorporation of one atom of oxygen	MF	99/3560	160/24793	99/160	Leaf_vs_Root	7.40895e-08	1.20662e-05	VLG8_001919;VLG6_001948;VLG1_000308;VLG6_001708;VLG3_001110;VLG7_000188;VLG6_000473;VLG3_001330;VLG1_000809;VLG6_000593;VLG3_001152;VLG3_001150;VLG3_001424;VLG6_001337;VLG8_000690;VLG8_001364;VLG3_001147;VLG6_001704;VLG1_001445;VLG8_001445;VLG3_000665;VLG3_001111;VLG1_001444;VLG3_000654;VLG8_000691;VLG4_001395;VLG1_001616;VLG6_001856;VLG8_000692;VLG11_000882;VLG4_000895;VLG4_000893;VLG5_002137;VL…	1.52011
GO:0004553	hydrolase activity, hydrolyzing O-glycosyl compounds	MF	151/3560	264/24793	151/264	Leaf_vs_Root	6.70007e-08	1.11344e-05	VLG5_000278;VLG9_000791;VLG8_001250;VLG2_001282;VLG9_000312;VLG7_001482;VLG5_001702;VLG4_000157;VLG4_000889;VLG5_001225;VLG5_001706;VLG12_001328;VLG4_001161;VLG6_000633;VLG5_000290;VLG12_001325;VLG5_000287;VLG5_001701;VLG12_000981;VLG1_000689;VLG12_000337;VLG8_002008;VLG5_002030;VLG7_000501;VLG2_000669;VLG12_002144;VLG12_001322;VLG1_000620;VLG12_000011;VLG5_001711;VLG7_001835;VLG9_001482;VLG12_00…	1.4072
GO:0008171	O-methyltransferase activity	MF	41/3560	50/24793	41/50	Leaf_vs_Root	3.30131e-09	7.07435e-07	VLG2_000228;VLG2_001926;VLG11_000944;VLG8_000829;VLG10_000727;VLG8_001850;VLG10_001215;VLG10_000250;VLG10_000725;VLG10_000739;VLG8_000830;VLG4_001509;VLG2_000091;VLG5_000018;VLG10_000959;VLG4_001511;VLG7_001344;VLG10_000761;VLG4_001510;VLG4_001508;VLG10_001213;VLG10_000729;VLG5_001521;VLG10_000728;VLG10_001205;VLG4_001359;VLG10_000741;VLG2_000090;VLG2_001925;VLG10_000726;VLG10_001214;VLG2_001924;…	2.00979
GO:0004497	monooxygenase activity	MF	134/3560	220/24793	134/220	Leaf_vs_Root	1.70172e-09	4.19911e-07	VLG2_000600;VLG8_001919;VLG6_001948;VLG1_000308;VLG2_001899;VLG6_001708;VLG8_001804;VLG8_001803;VLG3_001110;VLG1_000779;VLG6_000473;VLG7_000188;VLG1_001535;VLG8_001805;VLG1_000809;VLG3_001330;VLG6_000593;VLG3_001152;VLG3_001150;VLG10_000530;VLG3_001424;VLG3_001064;VLG6_001337;VLG8_000690;VLG1_002168;VLG1_000780;VLG8_001364;VLG3_001147;VLG6_001704;VLG1_001445;VLG8_002054;VLG10_001315;VLG8_001445;V…	1.49886
GO:0016491	oxidoreductase activity	MF	430/3560	840/24793	430/840	Leaf_vs_Root	5.25318e-10	1.52774e-07	VLG1_000515;VLG7_000862;VLG6_001378;VLG6_001948;VLG3_000709;VLG9_000378;VLG10_001923;VLG6_000588;VLG10_000917;VLG3_001110;VLG1_001535;VLG1_000809;VLG8_001050;VLG6_001237;VLG3_001150;VLG10_000530;VLG9_001157;VLG7_001576;VLG10_000129;VLG6_001591;VLG1_002168;VLG7_000437;VLG6_001704;VLG1_001445;VLG6_000548;VLG1_001444;VLG10_000877;VLG3_001142;VLG7_000530;VLG5_001185;VLG1_001340;VLG8_000692;VLG11_0001…	1.2704
ko360	Phenylalanine metabolism	KEGG	32/3560	60/24793	32/60	Leaf_vs_Root	0.0104068	0.0476146	VLG2_002003;VLG3_001176;VLG3_001521;VLG10_001626;VLG10_001184;VLG7_001514;VLG2_002000;VLG10_001187;VLG10_001186;VLG10_000762;VLG6_001037;VLG2_001998;VLG10_000699;VLG8_002113;VLG2_001999;VLG1_000159;VLG2_001995;VLG2_001996;VLG7_000552;VLG9_001157;VLG12_001232;VLG10_000759;VLG9_001155;VLG3_001175;VLG2_000848;VLG4_000169;VLG5_000968;VLG10_001185;VLG2_001997;VLG10_001188;VLG10_000764;VLG11_001749	1.42182
ko900	Terpenoid backbone biosynthesis	KEGG	36/3560	69/24793	36/69	Leaf_vs_Root	0.0106373	0.0476146	VLG6_000239;VLG3_001044;VLG5_000053;VLG5_000055;VLG11_000976;VLG8_001602;VLG3_001135;VLG5_000054;VLG10_000578;VLG2_000476;VLG8_001063;VLG12_000188;VLG8_001923;VLG3_000607;VLG7_000648;VLG8_000121;VLG3_000613;VLG6_000364;VLG3_000599;VLG12_001662;VLG6_000033;VLG2_001927;VLG10_000580;VLG9_000670;VLG10_001540;VLG1_001254;VLG10_001393;VLG12_001392;VLG9_001071;VLG6_001549;VLG8_002325;VLG6_000697;VLG12_0…	1.39024
ko10	Glycolysis / Gluconeogenesis	KEGG	60/3560	123/24793	60/123	Leaf_vs_Root	0.00843751	0.0396563	VLG1_001218;VLG2_000683;VLG1_002276;VLG6_001252;VLG6_000562;VLG7_000357;VLG1_002279;VLG5_001406;VLG8_002333;VLG10_000505;VLG3_000887;VLG1_002275;VLG2_002061;VLG1_001170;VLG4_001314;VLG12_001010;VLG9_000693;VLG1_002277;VLG1_000615;VLG3_000006;VLG7_001343;VLG7_000367;VLG1_000826;VLG8_000328;VLG1_000514;VLG8_001270;VLG8_001589;VLG1_002303;VLG6_001635;VLG8_000915;VLG3_000007;VLG8_000528;VLG6_002065;V…	1.29796
ko960	Tropane, piperidine and pyridine alkaloid biosynthesis	KEGG	26/3560	46/24793	26/46	Leaf_vs_Root	0.00767437	0.0369944	VLG11_000423;VLG3_001771;VLG3_001176;VLG12_000676;VLG3_001773;VLG11_000422;VLG10_001184;VLG10_001187;VLG10_001186;VLG10_000762;VLG3_001774;VLG10_000699;VLG1_000159;VLG7_000552;VLG9_001157;VLG11_000419;VLG3_001776;VLG10_000759;VLG9_001155;VLG3_001175;VLG4_000169;VLG5_000968;VLG10_001185;VLG10_001188;VLG10_000764;VLG12_000675	1.50811
ko71	Fatty acid degradation	KEGG	27/3560	48/24793	27/48	Leaf_vs_Root	0.00725095	0.0358731	VLG1_001218;VLG1_002276;VLG3_000993;VLG6_001252;VLG1_002279;VLG12_001582;VLG1_002275;VLG4_001314;VLG12_001010;VLG1_002277;VLG4_001197;VLG1_000615;VLG2_001743;VLG9_001006;VLG8_001589;VLG6_001635;VLG6_002065;VLG10_001540;VLG7_001569;VLG7_001570;VLG2_001526;VLG11_000146;VLG2_001191;VLG9_001015;VLG1_001217;VLG1_000616;VLG12_001921	1.50057
ko944	Flavone and flavonol biosynthesis	KEGG	14/3560	21/24793	14/21	Leaf_vs_Root	0.00701101	0.0358731	VLG10_000577;VLG4_001504;VLG4_001511;VLG8_001364;VLG12_000348;VLG12_000350;VLG4_001510;VLG4_001509;VLG4_001500;VLG4_001508;VLG12_000231;VLG12_000349;VLG4_001505;VLG4_001499	1.78358
ko511	Other glycan degradation	KEGG	17/3560	27/24793	17/27	Leaf_vs_Root	0.00711217	0.0358731	VLG12_000336;VLG11_001224;VLG12_001067;VLG7_000873;VLG1_000504;VLG9_001482;VLG7_000872;VLG11_001394;VLG6_000633;VLG7_000874;VLG11_001223;VLG12_000337;VLG2_000280;VLG11_001299;VLG11_000081;VLG4_000157;VLG4_000159	1.68325
ko909	Sesquiterpenoid and triterpenoid biosynthesis	KEGG	33/3560	61/24793	33/61	Leaf_vs_Root	0.00708779	0.0358731	VLG5_002137;VLG7_000185;VLG5_000702;VLG4_000910;VLG8_000176;VLG2_000676;VLG8_000177;VLG2_002014;VLG5_001995;VLG5_002142;VLG8_000432;VLG4_000905;VLG5_000703;VLG8_000173;VLG4_000907;VLG1_001491;VLG5_001994;VLG8_000174;VLG8_000175;VLG4_000912;VLG5_001998;VLG5_000705;VLG4_000904;VLG5_001990;VLG5_000701;VLG5_000696;VLG4_000908;VLG2_002015;VLG10_001393;VLG5_002139;VLG6_001856;VLG4_000913;VLG5_002138	1.44196
ko908	Zeatin biosynthesis	KEGG	30/3560	54/24793	30/54	Leaf_vs_Root	0.00608297	0.0336353	VLG11_000368;VLG7_000326;VLG11_000454;VLG7_001198;VLG6_001194;VLG6_001233;VLG7_000325;VLG11_000369;VLG7_001483;VLG11_000451;VLG12_000688;VLG1_001536;VLG12_000686;VLG1_001535;VLG7_001411;VLG4_000920;VLG11_000363;VLG11_000453;VLG11_000365;VLG11_000367;VLG12_000687;VLG7_000321;VLG7_001409;VLG10_001315;VLG7_000323;VLG7_001408;VLG7_001410;VLG11_000449;VLG11_000366;VLG1_000729	1.48132
ko4075	Plant hormone signal transduction	KEGG	122/3560	268/24793	122/268	Leaf_vs_Root	0.005688	0.0324044	VLG12_001182;VLG12_001480;VLG4_000485;VLG1_001378;VLG12_001245;VLG9_001284;VLG3_000642;VLG2_002044;VLG5_001820;VLG9_000960;VLG4_000555;VLG12_000874;VLG7_001589;VLG1_002173;VLG2_000928;VLG6_000728;VLG6_000729;VLG10_000760;VLG2_001417;VLG6_001000;VLG10_000763;VLG6_001474;VLG6_000903;VLG7_001712;VLG12_001083;VLG10_000350;VLG11_001886;VLG8_002107;VLG1_001394;VLG12_000677;VLG5_000506;VLG8_002106;VLG1_…	1.21107
ko950	Isoquinoline alkaloid biosynthesis	KEGG	24/3560	40/24793	24/40	Leaf_vs_Root	0.00365961	0.0215002	VLG5_001584;VLG3_001176;VLG5_001586;VLG10_001184;VLG10_001187;VLG10_001186;VLG10_000762;VLG10_000699;VLG5_001585;VLG8_002113;VLG1_000159;VLG5_001580;VLG7_000552;VLG9_001157;VLG10_000759;VLG9_001155;VLG3_001175;VLG5_001583;VLG2_000848;VLG4_000169;VLG5_001582;VLG10_001185;VLG10_001188;VLG10_000764	1.60095
ko1058	Acridone alkaloid biosynthesis	KEGG	25/3560	42/24793	25/42	Leaf_vs_Root	0.0035321	0.0214205	VLG9_001464;VLG9_001459;VLG6_001298;VLG9_001471;VLG9_001465;VLG6_001291;VLG11_001777;VLG6_001292;VLG1_001694;VLG6_001293;VLG1_000714;VLG6_001300;VLG9_001461;VLG1_001693;VLG9_001458;VLG9_001467;VLG6_001295;VLG2_001553;VLG9_001456;VLG9_001457;VLG1_000713;VLG6_001294;VLG6_001299;VLG1_000715;VLG9_001463	1.58798
ko942	Anthocyanin biosynthesis	KEGG	13/3560	18/24793	13/18	Leaf_vs_Root	0.00325977	0.0204279	VLG7_001210;VLG11_000807;VLG7_001497;VLG12_001178;VLG7_001509;VLG7_001510;VLG7_001498;VLG7_001507;VLG7_001511;VLG2_001592;VLG11_000806;VLG7_001211;VLG11_000808	1.92992
ko902	Monoterpenoid biosynthesis	KEGG	30/3560	52/24793	30/52	Leaf_vs_Root	0.00284713	0.0184573	VLG7_000346;VLG5_000702;VLG7_000975;VLG7_000348;VLG7_000966;VLG12_000430;VLG7_001120;VLG11_000976;VLG7_000977;VLG7_000347;VLG2_000476;VLG7_000968;VLG5_000703;VLG7_000352;VLG3_000607;VLG7_000976;VLG7_000350;VLG3_000613;VLG3_000599;VLG7_000978;VLG5_000705;VLG5_000701;VLG7_000967;VLG7_000351;VLG10_001393;VLG7_000970;VLG12_000432;VLG7_000349;VLG7_000345;VLG12_000845	1.53804
ko4040	Ion channels	KEGG	43/3560	80/24793	43/80	Leaf_vs_Root	0.00270217	0.0181431	VLG6_000914;VLG2_000316;VLG11_000679;VLG1_000897;VLG1_000905;VLG10_000552;VLG10_001172;VLG1_000899;VLG5_001513;VLG11_000678;VLG5_001511;VLG10_001723;VLG8_001929;VLG10_001632;VLG1_001097;VLG1_000887;VLG3_001507;VLG10_000837;VLG2_001877;VLG1_001240;VLG2_001172;VLG12_002331;VLG1_000907;VLG8_001095;VLG2_001878;VLG1_000891;VLG1_000889;VLG6_000688;VLG8_001588;VLG6_000683;VLG8_001101;VLG1_000674;VLG1_00…	1.43147
ko945	Stilbenoid, diarylheptanoid and gingerol biosynthesis	KEGG	49/3560	93/24793	49/93	Leaf_vs_Root	0.00246909	0.0171922	VLG6_001956;VLG12_000307;VLG10_000727;VLG2_000228;VLG8_001850;VLG10_001215;VLG10_000739;VLG10_000725;VLG12_002237;VLG4_001509;VLG5_001098;VLG9_000331;VLG2_000091;VLG9_000330;VLG10_000959;VLG12_002235;VLG11_001777;VLG4_001511;VLG4_001430;VLG4_001510;VLG11_000510;VLG11_001356;VLG12_002238;VLG4_001508;VLG4_001404;VLG10_001213;VLG10_000729;VLG5_001521;VLG10_000728;VLG10_001205;VLG4_000431;VLG4_000113…	1.40282
ko3000	Transcription factors	KEGG	200/3560	450/24793	200/450	Leaf_vs_Root	0.00207258	0.0155858	VLG1_001514;VLG5_000540;VLG6_000412;VLG5_001389;VLG4_001007;VLG5_002062;VLG12_001380;VLG10_000241;VLG10_001782;VLG4_000395;VLG10_000543;VLG9_000794;VLG12_002205;VLG1_000128;VLG2_001194;VLG6_001124;VLG8_001378;VLG4_001177;VLG11_001216;VLG10_001428;VLG7_001658;VLG11_000753;VLG10_000401;VLG5_002069;VLG12_001779;VLG1_000121;VLG1_002211;VLG1_001472;VLG4_000124;VLG11_000674;VLG5_000456;VLG8_000330;VLG5…	1.1843
ko260	Glycine, serine and threonine metabolism	KEGG	40/3560	72/24793	40/72	Leaf_vs_Root	0.00166715	0.0134525	VLG10_001161;VLG12_000341;VLG1_000975;VLG5_000969;VLG6_001252;VLG2_000393;VLG6_000291;VLG3_001176;VLG3_000487;VLG6_001553;VLG7_000665;VLG10_001003;VLG3_000708;VLG4_000466;VLG1_000520;VLG4_001367;VLG2_000450;VLG12_001980;VLG2_002354;VLG5_001947;VLG9_001157;VLG3_000707;VLG9_001155;VLG3_001175;VLG12_000899;VLG8_000151;VLG5_000970;VLG1_001744;VLG1_000576;VLG5_000968;VLG5_001331;VLG3_001504;VLG4_00016…	1.47982
ko4626	Plant-pathogen interaction	KEGG	126/3560	270/24793	126/270	Leaf_vs_Root	0.00171734	0.0134525	VLG6_000914;VLG3_000779;VLG7_001568;VLG3_000422;VLG12_000560;VLG7_001116;VLG1_000260;VLG8_000639;VLG4_000995;VLG4_000416;VLG4_001177;VLG2_002044;VLG12_001788;VLG3_000318;VLG5_001277;VLG8_001050;VLG10_001096;VLG12_001752;VLG6_000622;VLG4_000592;VLG11_000223;VLG6_000420;VLG8_001184;VLG5_001246;VLG12_001876;VLG2_002042;VLG4_000591;VLG1_001652;VLG2_002051;VLG9_000155;VLG8_000989;VLG7_001833;VLG2_0000…	1.2424
ko1001	Protein kinases	KEGG	255/3560	582/24793	255/582	Leaf_vs_Root	0.00145691	0.0124499	VLG10_001603;VLG7_001568;VLG2_001294;VLG12_001211;VLG10_001076;VLG2_000726;VLG1_001625;VLG8_002314;VLG5_001742;VLG5_000653;VLG5_000543;VLG5_000664;VLG4_000563;VLG10_001152;VLG5_001820;VLG5_000656;VLG5_000660;VLG5_000677;VLG11_000889;VLG10_001074;VLG10_000989;VLG12_000662;VLG5_000676;VLG9_001159;VLG8_000278;VLG7_001221;VLG10_000923;VLG3_000128;VLG11_000482;VLG10_001096;VLG12_001503;VLG9_001336;VLG…	1.16884
ko710	Carbon fixation in photosynthetic organisms	KEGG	37/3560	64/24793	37/64	Leaf_vs_Root	0.000916355	0.00820356	VLG2_000683;VLG11_001469;VLG8_002333;VLG3_001451;VLG3_000887;VLG7_000706;VLG1_001390;VLG6_000846;VLG9_000693;VLG8_001322;VLG10_001003;VLG10_000699;VLG12_001207;VLG3_000006;VLG7_000367;VLG4_001367;VLG1_000159;VLG1_000514;VLG1_002303;VLG3_000007;VLG8_000528;VLG8_000540;VLG12_001488;VLG19_000001;VLG24_000024;VLG4_000918;VLG5_000386;VLG2_000364;VLG8_001064;VLG4_001475;VLG2_000351;VLG11_000184;VLG4_00…	1.54016
ko350	Tyrosine metabolism	KEGG	40/3560	70/24793	40/70	Leaf_vs_Root	0.000794854	0.00747163	VLG1_001218;VLG1_002276;VLG1_002279;VLG9_001650;VLG5_001584;VLG3_001176;VLG5_000095;VLG3_001521;VLG1_002275;VLG10_001626;VLG5_001586;VLG10_001184;VLG10_001187;VLG10_001186;VLG1_002277;VLG10_000762;VLG10_000699;VLG1_000615;VLG5_001585;VLG8_002113;VLG1_000159;VLG5_001580;VLG7_000552;VLG9_001157;VLG12_001232;VLG10_000759;VLG9_001155;VLG3_001175;VLG11_000146;VLG5_001583;VLG2_000848;VLG4_000169;VLG5_0…	1.52209
ko904	Diterpenoid biosynthesis	KEGG	22/3560	33/24793	22/33	Leaf_vs_Root	0.000739433	0.00731649	VLG5_001591;VLG7_000428;VLG1_000308;VLG7_000511;VLG5_001593;VLG3_000903;VLG1_000809;VLG8_000162;VLG5_001592;VLG7_001391;VLG3_001320;VLG4_000884;VLG7_000656;VLG6_001941;VLG11_001220;VLG5_001004;VLG4_000645;VLG5_001675;VLG9_000865;VLG10_000637;VLG4_000745;VLG2_001589	1.77777
ko630	Glyoxylate and dicarboxylate metabolism	KEGG	42/3560	73/24793	42/73	Leaf_vs_Root	0.000488046	0.00509737	VLG12_000341;VLG7_000862;VLG1_001232;VLG1_000975;VLG5_000969;VLG2_000393;VLG6_000291;VLG8_000123;VLG10_000846;VLG3_001080;VLG3_000487;VLG6_000529;VLG5_000025;VLG9_000683;VLG7_000665;VLG10_001003;VLG12_001207;VLG3_000708;VLG1_000520;VLG4_001367;VLG12_001980;VLG5_001947;VLG10_000956;VLG10_001540;VLG5_000850;VLG3_000580;VLG19_000001;VLG3_000707;VLG24_000024;VLG12_001957;VLG7_000043;VLG4_000918;VLG5_…	1.53239
ko380	Tryptophan metabolism	KEGG	62/3560	115/24793	62/115	Leaf_vs_Root	0.000318703	0.00352448	VLG5_002025;VLG2_002003;VLG1_001232;VLG2_001320;VLG6_001252;VLG8_001640;VLG9_001464;VLG2_001315;VLG9_001459;VLG6_001298;VLG9_001471;VLG9_001465;VLG12_001825;VLG4_001119;VLG6_001291;VLG4_001314;VLG3_000117;VLG2_001319;VLG2_002000;VLG6_001292;VLG12_000438;VLG8_001641;VLG12_001010;VLG8_000689;VLG2_001998;VLG6_001293;VLG7_001575;VLG6_001300;VLG1_002180;VLG2_001999;VLG9_001461;VLG2_001995;VLG8_002113;…	1.43555
ko906	Carotenoid biosynthesis	KEGG	35/3560	57/24793	35/57	Leaf_vs_Root	0.000258375	0.0030359	VLG2_000251;VLG7_000428;VLG11_001136;VLG2_000252;VLG5_002249;VLG9_000378;VLG2_000242;VLG9_001633;VLG2_000232;VLG8_001289;VLG4_000669;VLG2_000248;VLG9_001628;VLG12_000438;VLG2_000247;VLG7_001756;VLG8_001833;VLG9_001632;VLG1_001101;VLG7_001685;VLG1_002212;VLG6_000410;VLG4_000661;VLG12_001697;VLG2_002144;VLG9_001637;VLG7_001935;VLG6_001204;VLG9_001636;VLG2_000249;VLG9_001629;VLG10_000344;VLG12_00092…	1.63577
ko4812	Cytoskeleton proteins	KEGG	97/3560	190/24793	97/190	Leaf_vs_Root	0.000129851	0.00171316	VLG3_001075;VLG6_000319;VLG12_001937;VLG7_000840;VLG2_000167;VLG2_001234;VLG11_001232;VLG12_000436;VLG7_001336;VLG11_001569;VLG11_000788;VLG2_000382;VLG4_001512;VLG12_000791;VLG4_001442;VLG11_000360;VLG7_001573;VLG2_000179;VLG3_000004;VLG9_000496;VLG3_001161;VLG9_001020;VLG6_000303;VLG2_000329;VLG1_001140;VLG3_000777;VLG5_001354;VLG6_000378;VLG5_001156;VLG12_000547;VLG1_000458;VLG11_000764;VLG11_…	1.3601
ko592	alpha-Linolenic acid metabolism	KEGG	42/3560	70/24793	42/70	Leaf_vs_Root	0.000136689	0.00171316	VLG2_000600;VLG1_000747;VLG2_001642;VLG3_001428;VLG1_002276;VLG4_000876;VLG10_001300;VLG2_001769;VLG9_001151;VLG12_001585;VLG1_002279;VLG1_001919;VLG10_001301;VLG1_002275;VLG6_001655;VLG12_001030;VLG5_000239;VLG1_000746;VLG1_000806;VLG2_000654;VLG1_002277;VLG6_001083;VLG1_002266;VLG6_001237;VLG10_000530;VLG8_000155;VLG6_001654;VLG3_001431;VLG3_001433;VLG1_001922;VLG8_001518;VLG11_001913;VLG1_0019…	1.59805
ko943	Isoflavonoid biosynthesis	KEGG	31/3560	47/24793	31/47	Leaf_vs_Root	8.55909e-05	0.00123778	VLG6_001706;VLG10_000727;VLG9_000643;VLG10_000725;VLG6_001702;VLG6_001708;VLG2_000091;VLG7_000188;VLG6_001713;VLG6_001703;VLG10_001213;VLG10_000577;VLG10_000729;VLG6_001704;VLG1_001445;VLG10_000728;VLG6_001707;VLG10_001205;VLG2_000090;VLG7_000186;VLG1_001444;VLG6_000852;VLG6_000855;VLG10_000726;VLG10_001214;VLG6_001711;VLG10_001208;VLG9_001419;VLG6_000853;VLG10_001203;VLG10_001207	1.75693
ko500	Starch and sucrose metabolism	KEGG	127/3560	246/24793	127/246	Leaf_vs_Root	6.26036e-06	9.8079e-05	VLG5_000278;VLG2_001282;VLG11_000672;VLG11_000019;VLG7_001482;VLG5_001702;VLG4_000461;VLG6_000222;VLG4_000889;VLG12_001328;VLG5_001706;VLG1_001375;VLG5_000290;VLG12_001325;VLG5_000287;VLG5_001701;VLG7_001655;VLG5_002030;VLG10_000574;VLG7_000501;VLG11_000670;VLG12_002144;VLG12_001322;VLG6_000988;VLG3_000826;VLG1_000620;VLG5_000541;VLG5_001711;VLG8_001230;VLG8_000753;VLG6_000315;VLG12_001167;VLG4_0…	1.37766
ko2010	ABC transporters	KEGG	49/3560	76/24793	49/76	Leaf_vs_Root	2.19451e-06	3.75062e-05	VLG9_000230;VLG4_001471;VLG4_001472;VLG11_000985;VLG6_000233;VLG5_001857;VLG10_001057;VLG8_000060;VLG3_001015;VLG7_000088;VLG1_000437;VLG1_000429;VLG4_000105;VLG7_001707;VLG7_000815;VLG3_000434;VLG4_001473;VLG8_000065;VLG10_001056;VLG1_000428;VLG5_000219;VLG7_001348;VLG1_000427;VLG5_000868;VLG7_001226;VLG10_001788;VLG7_000576;VLG10_001685;VLG11_001601;VLG10_001758;VLG8_000064;VLG11_001103;VLG1_00…	1.71731
ko860	Porphyrin and chlorophyll metabolism	KEGG	43/3560	63/24793	43/63	Leaf_vs_Root	9.26233e-07	1.74132e-05	VLG10_000354;VLG1_000515;VLG2_000943;VLG7_000991;VLG10_000186;VLG2_000942;VLG5_000018;VLG12_002056;VLG12_002049;VLG2_001166;VLG12_002057;VLG3_000210;VLG8_001063;VLG9_000033;VLG8_001740;VLG11_000052;VLG1_001124;VLG7_001546;VLG8_002124;VLG9_001191;VLG6_000747;VLG12_000304;VLG6_000413;VLG12_002041;VLG7_001576;VLG12_002055;VLG12_001975;VLG12_001662;VLG1_002168;VLG10_000185;VLG10_001121;VLG1_001128;VL…	1.81761
ko196	Photosynthesis - antenna proteins	KEGG	15/3560	15/24793	15/15	Leaf_vs_Root	4.64299e-07	9.69869e-06	VLG10_000459;VLG5_000588;VLG2_000498;VLG10_000406;VLG8_000196;VLG4_001519;VLG8_001717;VLG1_001107;VLG6_000711;VLG6_001003;VLG11_001420;VLG8_001058;VLG5_001725;VLG3_001587;VLG11_001727	2.64677
ko130	Ubiquinone and other terpenoid-quinone biosynthesis	KEGG	34/3560	44/24793	34/44	Leaf_vs_Root	1.10653e-07	2.60035e-06	VLG11_000944;VLG12_002237;VLG10_001662;VLG2_000935;VLG12_001144;VLG10_001626;VLG5_001887;VLG4_000426;VLG6_000356;VLG12_002235;VLG10_001184;VLG10_001187;VLG8_002176;VLG10_001186;VLG10_000762;VLG11_001356;VLG12_002238;VLG4_000066;VLG7_000552;VLG12_002313;VLG8_001095;VLG6_000134;VLG10_000759;VLG3_001762;VLG4_001562;VLG5_000968;VLG10_001185;VLG1_002199;VLG10_001188;VLG7_001764;VLG5_001659;VLG10_00076…	2.0561
ko2000	Transporters	KEGG	356/3560	752/24793	356/752	Leaf_vs_Root	2.4616e-08	6.61115e-07	VLG7_001180;VLG7_000104;VLG9_001356;VLG12_000814;VLG12_001037;VLG6_001915;VLG2_001405;VLG5_002241;VLG8_001768;VLG9_000093;VLG12_001347;VLG1_001210;VLG8_001303;VLG12_000111;VLG1_000430;VLG5_000867;VLG9_001016;VLG5_000421;VLG5_001840;VLG10_000765;VLG9_001418;VLG6_002114;VLG4_001471;VLG7_001184;VLG5_001972;VLG11_000671;VLG5_001857;VLG7_001515;VLG7_000815;VLG12_001694;VLG1_000475;VLG10_000504;VLG7_00…	1.27519
ko99980	Enzymes with EC numbers	KEGG	212/3560	408/24793	212/408	Leaf_vs_Root	2.58709e-09	8.10621e-08	VLG6_000018;VLG6_000995;VLG11_000738;VLG5_000278;VLG6_001378;VLG8_000679;VLG12_001182;VLG8_000830;VLG8_001804;VLG12_001228;VLG11_000976;VLG12_001245;VLG11_001143;VLG5_001289;VLG9_000629;VLG6_001380;VLG6_001678;VLG8_001803;VLG10_000322;VLG8_001733;VLG6_000928;VLG9_001737;VLG4_000336;VLG8_001805;VLG5_000290;VLG5_000287;VLG10_000983;VLG2_000938;VLG5_000614;VLG5_000315;VLG7_001525;VLG9_000231;VLG7_00…	1.39427
ko940	Phenylpropanoid biosynthesis	KEGG	189/3560	354/24793	189/354	Leaf_vs_Root	1.19396e-09	4.4893e-08	VLG1_000733;VLG5_000278;VLG5_001085;VLG2_001282;VLG4_000834;VLG6_001817;VLG7_001482;VLG6_001298;VLG10_001923;VLG5_001098;VLG3_000278;VLG12_001144;VLG5_001702;VLG4_000030;VLG6_000588;VLG10_000917;VLG4_000889;VLG4_001511;VLG11_000563;VLG12_001328;VLG5_001706;VLG4_001430;VLG2_002322;VLG10_000170;VLG6_001293;VLG5_000290;VLG11_000510;VLG5_000287;VLG11_001356;VLG12_001325;VLG5_001701;VLG4_001404;VLG5_0…	1.4317
ko460	Cyanoamino acid metabolism	KEGG	101/3560	165/24793	101/165	Leaf_vs_Root	8.09508e-10	3.80469e-08	VLG5_000278;VLG2_001282;VLG7_001482;VLG7_001330;VLG5_001702;VLG4_000889;VLG12_001328;VLG5_001706;VLG12_001325;VLG5_000290;VLG5_000287;VLG5_001701;VLG1_000520;VLG8_000421;VLG5_002030;VLG8_000690;VLG12_002144;VLG12_001322;VLG8_000414;VLG8_000417;VLG5_001711;VLG8_000691;VLG8_000426;VLG8_000692;VLG6_000452;VLG8_000424;VLG5_000288;VLG5_000276;VLG2_001274;VLG6_000291;VLG5_000284;VLG12_001321;VLG2_00127…	1.63532
ko195	Photosynthesis	KEGG	48/3560	58/24793	48/58	Leaf_vs_Root	2.54569e-12	1.5953e-10	VLG8_000169;VLG19_000005;VLG5_000690;VLG12_001436;VLG5_000350;VLG6_001318;VLG5_000967;VLG24_000029;VLG11_001571;VLG10_000618;VLG4_001445;VLG1_001942;VLG1_001338;VLG1_002025;VLG2_000831;VLG1_002024;VLG8_000188;VLG12_001396;VLG24_000017;VLG10_001916;VLG6_000626;VLG24_000027;VLG2_000923;VLG24_000014;VLG11_001572;VLG19_000006;VLG19_000004;VLG3_000480;VLG8_002353;VLG4_001198;VLG5_001928;VLG10_001618;V…	2.20353
ko199	Cytochrome P450	KEGG	126/3560	197/24793	126/197	Leaf_vs_Root	6.72648e-14	6.32289e-12	VLG2_000600;VLG7_000346;VLG8_001919;VLG6_001948;VLG1_000308;VLG6_001708;VLG1_001515;VLG7_000347;VLG3_001153;VLG5_001231;VLG7_000188;VLG1_001535;VLG3_001330;VLG1_000809;VLG11_001356;VLG6_000593;VLG3_001152;VLG10_000530;VLG5_000042;VLG3_001150;VLG3_001424;VLG3_001064;VLG6_001337;VLG8_000690;VLG8_001364;VLG3_001147;VLG6_001704;VLG1_001445;VLG10_001315;VLG8_001445;VLG6_000548;VLG1_001444;VLG2_001778;…	1.71355
ko194	Photosynthesis proteins	KEGG	64/3560	74/24793	64/74	Leaf_vs_Root	5.35795e-18	1.0073e-15	VLG10_000459;VLG8_000169;VLG19_000005;VLG5_000690;VLG12_001436;VLG5_000350;VLG6_001318;VLG5_000967;VLG4_001519;VLG24_000029;VLG5_001725;VLG6_000711;VLG11_001571;VLG5_000588;VLG10_000618;VLG4_001445;VLG1_001942;VLG1_001338;VLG1_002025;VLG2_000831;VLG2_000498;VLG8_000196;VLG10_000406;VLG1_002024;VLG8_000188;VLG12_001396;VLG24_000017;VLG8_001717;VLG8_001058;VLG10_001916;VLG6_000626;VLG11_001420;VLG1…	2.30688
GO:0071281	cellular response to iron ion	BP	36/7692	74/24793	36/74	Leaf_vs_Stem	0.00127443	0.0488648	VLG6_001706;VLG6_000470;VLG10_001477;VLG12_000328;VLG1_001618;VLG6_001702;VLG6_001710;VLG2_001584;VLG1_002302;VLG1_001622;VLG8_000891;VLG1_000537;VLG6_000473;VLG6_001713;VLG2_000763;VLG1_001619;VLG2_001580;VLG12_000327;VLG3_001425;VLG4_000459;VLG3_001424;VLG6_001703;VLG8_000784;VLG6_000475;VLG9_000841;VLG6_001714;VLG6_001705;VLG12_000329;VLG8_001782;VLG6_001704;VLG6_001707;VLG1_001617;VLG5_002007…	1.57314
GO:0009718	anthocyanin-containing compound biosynthetic process	BP	28/7692	54/24793	28/54	Leaf_vs_Stem	0.0012663	0.048823	VLG1_000750;VLG10_001693;VLG10_001696;VLG7_001510;VLG7_001498;VLG3_000454;VLG4_001509;VLG10_001156;VLG4_001511;VLG10_001157;VLG10_001697;VLG10_001695;VLG7_001509;VLG4_001510;VLG4_001502;VLG10_001700;VLG4_001508;VLG7_001511;VLG10_000577;VLG10_001689;VLG4_000318;VLG7_001211;VLG3_001142;VLG7_001210;VLG7_001507;VLG4_001500;VLG7_001087;VLG4_001499	1.67833
GO:0052386	cell wall thickening	BP	28/7692	54/24793	28/54	Leaf_vs_Stem	0.0012663	0.048823	VLG6_001706;VLG1_000230;VLG10_001257;VLG3_001597;VLG3_001601;VLG2_000788;VLG6_001702;VLG6_001710;VLG2_000796;VLG6_001713;VLG9_000419;VLG8_001366;VLG3_001606;VLG6_001703;VLG8_001873;VLG1_000791;VLG2_000789;VLG6_001714;VLG6_001705;VLG6_001704;VLG3_001604;VLG6_001707;VLG10_000796;VLG8_001573;VLG4_000362;VLG10_000207;VLG2_001473;VLG2_000802	1.67833
GO:0009636	response to toxic substance	BP	105/7692	261/24793	105/261	Leaf_vs_Stem	0.00118447	0.0461811	VLG7_001180;VLG1_001232;VLG12_002246;VLG3_000749;VLG10_001923;VLG1_001211;VLG3_000923;VLG12_001228;VLG7_001183;VLG6_000588;VLG8_001294;VLG8_001693;VLG10_000231;VLG7_000127;VLG7_001518;VLG1_002327;VLG10_000999;VLG6_001591;VLG7_000437;VLG8_001303;VLG12_000626;VLG8_002190;VLG7_000530;VLG2_001247;VLG1_001340;VLG1_001230;VLG5_001667;VLG1_002314;VLG3_001003;VLG7_000211;VLG11_001749;VLG7_001177;VLG5_000…	1.29912
GO:0016051	carbohydrate biosynthetic process	BP	82/7692	196/24793	82/196	Leaf_vs_Stem	0.00103768	0.0409178	VLG6_001789;VLG11_001469;VLG1_000153;VLG4_000461;VLG8_002084;VLG1_001423;VLG5_002117;VLG1_001492;VLG10_001456;VLG9_000291;VLG2_000867;VLG3_000007;VLG8_000528;VLG12_001488;VLG6_001843;VLG5_000541;VLG3_000840;VLG7_001328;VLG8_000753;VLG5_002124;VLG2_000683;VLG8_002333;VLG12_001251;VLG5_002125;VLG10_001454;VLG11_000534;VLG12_002308;VLG3_000006;VLG8_000373;VLG1_000514;VLG6_001106;VLG9_000868;VLG2_001…	1.35095
GO:0042592	homeostatic process	BP	196/7692	522/24793	196/522	Leaf_vs_Stem	0.00102315	0.0405754	VLG10_000459;VLG8_001919;VLG12_000814;VLG10_001453;VLG1_000308;VLG1_002243;VLG4_000629;VLG6_001065;VLG2_001899;VLG2_001584;VLG12_001228;VLG8_000406;VLG8_001037;VLG2_000071;VLG6_000645;VLG1_001535;VLG12_000679;VLG6_000593;VLG8_001050;VLG4_000459;VLG7_001230;VLG7_000127;VLG4_000818;VLG1_000780;VLG11_001169;VLG2_002296;VLG12_001247;VLG12_000626;VLG2_000133;VLG11_001395;VLG6_000548;VLG6_001140;VLG5_0…	1.21428
GO:0009699	phenylpropanoid biosynthetic process	BP	41/7692	86/24793	41/86	Leaf_vs_Stem	0.00101275	0.0403935	VLG9_000643;VLG7_000088;VLG3_000173;VLG6_000604;VLG10_001616;VLG3_001759;VLG6_000019;VLG2_002335;VLG6_000588;VLG6_000797;VLG8_001737;VLG12_000491;VLG5_001231;VLG5_001706;VLG12_000600;VLG5_000606;VLG2_000647;VLG3_001707;VLG11_001601;VLG6_001892;VLG8_001782;VLG3_001710;VLG7_001735;VLG11_001532;VLG1_000739;VLG5_001099;VLG2_000637;VLG5_001705;VLG12_001915;VLG5_001711;VLG10_001615;VLG3_001142;VLG11_00…	1.54101
GO:0002252	immune effector process	BP	48/7692	104/24793	48/104	Leaf_vs_Stem	0.000972678	0.0393492	VLG7_000266;VLG10_001300;VLG6_000686;VLG11_000193;VLG8_000989;VLG10_000844;VLG12_000328;VLG11_000207;VLG10_001301;VLG9_000584;VLG5_000335;VLG9_000607;VLG7_001595;VLG11_000194;VLG11_000206;VLG11_000191;VLG4_000341;VLG6_002015;VLG12_000327;VLG8_002009;VLG11_000204;VLG1_001240;VLG11_000197;VLG11_000187;VLG12_001382;VLG11_000195;VLG9_000868;VLG8_002008;VLG9_000901;VLG12_001522;VLG11_000198;VLG7_00026…	1.49127
GO:0006826	iron ion transport	BP	14/7692	21/24793	14/21	Leaf_vs_Stem	0.000886224	0.0368287	VLG1_002302;VLG8_000784;VLG5_000142;VLG3_000255;VLG3_001516;VLG1_000971;VLG1_000511;VLG11_001395;VLG2_001580;VLG3_001532;VLG3_001531;VLG5_001252;VLG4_000459;VLG2_001584	2.16242
GO:1901038	cyanidin 3-O-glucoside metabolic process	BP	14/7692	21/24793	14/21	Leaf_vs_Stem	0.000886224	0.0368287	VLG7_001210;VLG4_001511;VLG7_001509;VLG7_001510;VLG7_001498;VLG4_001510;VLG4_001502;VLG7_001507;VLG4_001509;VLG4_001500;VLG7_001211;VLG4_001508;VLG7_001511;VLG4_001499	2.16242
GO:0016115	terpenoid catabolic process	BP	15/7692	23/24793	15/23	Leaf_vs_Stem	0.00081693	0.0343606	VLG7_001410;VLG4_000669;VLG10_000360;VLG10_000363;VLG7_000656;VLG10_000361;VLG9_000865;VLG1_002212;VLG7_001408;VLG6_000297;VLG2_001127;VLG5_002246;VLG7_001412;VLG10_000819;VLG10_000362	2.11503
GO:0009833	plant-type primary cell wall biogenesis	BP	20/7692	34/24793	20/34	Leaf_vs_Stem	0.000800576	0.0340083	VLG2_000865;VLG5_002125;VLG2_000864;VLG3_000854;VLG2_000868;VLG10_001454;VLG5_002117;VLG10_001456;VLG2_000867;VLG5_000475;VLG8_000036;VLG10_001455;VLG5_002118;VLG10_001457;VLG5_002124;VLG5_002115;VLG2_000866;VLG5_002120;VLG5_002116;VLG8_001199	1.90619
GO:0007167	enzyme-linked receptor protein signaling pathway	BP	86/7692	205/24793	86/205	Leaf_vs_Stem	0.000717742	0.0315261	VLG6_001548;VLG4_000449;VLG2_000788;VLG9_000419;VLG8_002170;VLG4_000038;VLG12_000660;VLG10_001049;VLG8_002171;VLG4_000362;VLG2_000378;VLG10_000674;VLG5_000080;VLG2_000159;VLG8_000143;VLG2_000802;VLG2_002158;VLG7_000257;VLG4_000210;VLG2_000796;VLG2_000389;VLG2_000070;VLG3_000154;VLG11_000706;VLG2_000171;VLG7_001895;VLG2_001013;VLG3_001606;VLG12_000024;VLG6_001248;VLG2_001545;VLG2_001710;VLG8_00018…	1.35484
GO:0010089	xylem development	BP	21/7692	36/24793	21/36	Leaf_vs_Stem	0.000693753	0.0306665	VLG4_001586;VLG5_001389;VLG3_001792;VLG11_000657;VLG10_000558;VLG9_000629;VLG1_000935;VLG1_001977;VLG1_002217;VLG5_001041;VLG12_000024;VLG9_001490;VLG6_000863;VLG3_001454;VLG2_002245;VLG11_000116;VLG12_000022;VLG6_000611;VLG9_000628;VLG7_001801;VLG3_000714	1.88981
GO:0098656	monoatomic anion transmembrane transport	BP	93/7692	224/24793	93/224	Leaf_vs_Stem	0.000674766	0.0304083	VLG1_000246;VLG3_000795;VLG7_001375;VLG9_001670;VLG2_000984;VLG10_000318;VLG3_001127;VLG6_000065;VLG2_000068;VLG3_000180;VLG10_000765;VLG3_001340;VLG5_001318;VLG2_001884;VLG2_000263;VLG3_000355;VLG4_001479;VLG9_000594;VLG9_000924;VLG11_000459;VLG11_000117;VLG1_000389;VLG9_001666;VLG12_002335;VLG7_001948;VLG1_000695;VLG1_002155;VLG8_000891;VLG12_000757;VLG10_000837;VLG8_000178;VLG1_002046;VLG5_001…	1.34093
GO:0042546	cell wall biogenesis	BP	66/7692	150/24793	66/150	Leaf_vs_Stem	0.000643277	0.0291787	VLG2_000865;VLG6_001789;VLG5_002005;VLG1_000723;VLG3_000173;VLG3_000209;VLG12_001676;VLG8_001139;VLG4_000469;VLG12_002352;VLG2_002335;VLG12_001251;VLG6_001305;VLG8_001737;VLG5_002125;VLG3_000574;VLG1_001431;VLG2_000864;VLG3_000854;VLG6_000934;VLG4_001373;VLG1_001423;VLG2_000868;VLG10_001454;VLG11_000534;VLG12_002308;VLG12_002355;VLG4_000801;VLG5_002117;VLG9_001346;VLG1_001492;VLG7_001388;VLG3_001…	1.42114
GO:0098771	inorganic ion homeostasis	BP	102/7692	248/24793	102/248	Leaf_vs_Stem	0.00056786	0.026099	VLG12_000814;VLG2_001584;VLG8_000406;VLG12_001228;VLG7_000770;VLG2_000071;VLG4_000459;VLG7_001230;VLG11_001169;VLG2_002296;VLG12_000626;VLG2_000133;VLG11_001395;VLG5_001252;VLG9_001053;VLG11_000997;VLG3_000089;VLG2_001247;VLG3_001516;VLG2_000159;VLG1_001951;VLG11_000029;VLG2_002158;VLG2_002287;VLG9_000924;VLG5_000181;VLG2_000156;VLG2_002286;VLG2_000070;VLG10_001738;VLG1_002302;VLG1_001338;VLG6_00…	1.32858
GO:0071368	cellular response to cytokinin stimulus	BP	29/7692	54/24793	29/54	Leaf_vs_Stem	0.000492611	0.0230994	VLG2_001100;VLG7_001510;VLG7_001498;VLG10_000465;VLG1_000581;VLG6_001065;VLG4_001358;VLG2_000186;VLG4_000601;VLG1_001558;VLG7_000045;VLG7_001509;VLG5_001041;VLG7_001511;VLG1_002173;VLG7_000220;VLG4_001449;VLG12_001981;VLG4_000552;VLG4_000444;VLG5_001398;VLG11_001886;VLG7_001210;VLG4_000248;VLG1_000974;VLG7_001507;VLG8_000320;VLG4_001293;VLG7_001211	1.73767
GO:0010087	phloem or xylem histogenesis	BP	54/7692	117/24793	54/117	Leaf_vs_Stem	0.000485385	0.0229154	VLG11_000496;VLG4_001586;VLG6_001001;VLG4_001438;VLG5_001389;VLG3_001792;VLG11_000487;VLG11_000657;VLG10_000465;VLG1_001075;VLG11_000486;VLG10_000558;VLG11_000432;VLG9_000629;VLG11_000512;VLG1_001977;VLG3_000560;VLG11_000501;VLG1_002217;VLG5_001041;VLG11_000488;VLG11_000509;VLG11_000482;VLG2_002146;VLG4_001434;VLG11_000490;VLG12_000024;VLG11_000505;VLG11_000511;VLG9_001490;VLG6_000863;VLG4_001435…	1.49112
GO:0009682	induced systemic resistance	BP	25/7692	44/24793	25/44	Leaf_vs_Stem	0.000383954	0.0183768	VLG6_001706;VLG10_001300;VLG6_000686;VLG12_000328;VLG6_001702;VLG10_001301;VLG6_001710;VLG6_001713;VLG12_000327;VLG1_001240;VLG6_001703;VLG7_001933;VLG5_000209;VLG6_001714;VLG6_001705;VLG12_000329;VLG8_001782;VLG6_001704;VLG6_000684;VLG6_001707;VLG6_000688;VLG6_000683;VLG7_001503;VLG11_001355;VLG3_001222	1.83918
GO:0008300	isoprenoid catabolic process	BP	16/7692	24/24793	16/24	Leaf_vs_Stem	0.000376334	0.0181372	VLG7_001410;VLG4_000669;VLG10_000360;VLG10_000363;VLG7_000656;VLG10_000361;VLG9_000865;VLG6_000802;VLG1_002212;VLG7_001408;VLG6_000297;VLG2_001127;VLG5_002246;VLG7_001412;VLG10_000819;VLG10_000362	2.15998
GO:0022900	electron transport chain	BP	34/7692	65/24793	34/65	Leaf_vs_Stem	0.000322576	0.0158771	VLG8_000169;VLG7_000020;VLG8_001048;VLG10_000257;VLG6_000549;VLG3_000709;VLG4_001041;VLG3_000984;VLG1_000297;VLG10_000618;VLG1_001942;VLG1_001338;VLG5_001092;VLG8_000188;VLG6_001644;VLG10_001916;VLG3_000006;VLG6_000960;VLG7_000019;VLG4_000491;VLG7_000693;VLG7_000572;VLG8_002353;VLG1_000661;VLG11_000849;VLG4_000490;VLG10_000286;VLG9_000625;VLG5_001619;VLG6_001358;VLG4_000772;VLG4_001198;VLG10_0017…	1.6916
GO:0032870	cellular response to hormone stimulus	BP	214/7692	563/24793	214/563	Leaf_vs_Stem	0.000284025	0.01471	VLG10_000459;VLG7_000854;VLG6_000686;VLG2_001100;VLG3_000416;VLG11_000193;VLG4_000485;VLG3_000718;VLG8_001461;VLG1_002154;VLG11_000207;VLG7_001831;VLG9_000794;VLG6_001065;VLG4_001358;VLG5_001526;VLG2_001610;VLG7_000511;VLG7_001509;VLG2_000887;VLG3_000903;VLG1_000809;VLG5_000445;VLG1_002173;VLG3_001424;VLG11_000195;VLG11_000755;VLG1_000450;VLG11_000198;VLG5_000209;VLG8_000509;VLG12_000626;VLG7_001…	1.23085
GO:0055072	obsolete iron ion homeostasis	BP	21/7692	34/24793	21/34	Leaf_vs_Stem	0.000231358	0.0124467	VLG5_000142;VLG12_000720;VLG2_001584;VLG7_000770;VLG1_002302;VLG6_000511;VLG8_000891;VLG1_000511;VLG2_001580;VLG3_001532;VLG4_000459;VLG7_001230;VLG8_000784;VLG7_001229;VLG11_001395;VLG3_000255;VLG3_001516;VLG5_001719;VLG3_001531;VLG11_000691;VLG7_000719	1.99969
GO:0001101	response to acid chemical	BP	385/7692	1066/24793	385/1066	Leaf_vs_Stem	0.000218359	0.0119806	VLG10_000459;VLG7_001180;VLG5_000666;VLG10_001453;VLG8_000830;VLG3_000037;VLG11_000207;VLG6_001065;VLG5_001526;VLG5_000660;VLG5_000677;VLG10_001848;VLG10_000989;VLG5_000676;VLG1_000809;VLG6_001237;VLG6_001228;VLG11_001857;VLG6_000548;VLG6_001520;VLG3_001142;VLG7_000238;VLG1_001340;VLG3_001125;VLG8_000498;VLG7_001503;VLG9_000392;VLG5_001325;VLG1_002064;VLG7_001176;VLG8_000678;VLG12_000692;VLG1_001…	1.17396
GO:0009751	response to salicylic acid	BP	89/7692	207/24793	89/207	Leaf_vs_Stem	0.000219241	0.0119806	VLG7_000854;VLG3_000416;VLG11_000193;VLG3_000037;VLG8_000830;VLG11_000207;VLG5_001526;VLG2_001610;VLG4_001177;VLG11_000753;VLG11_000195;VLG1_000450;VLG11_000198;VLG5_000209;VLG10_000213;VLG12_000660;VLG11_000200;VLG6_002043;VLG11_000882;VLG3_001003;VLG3_001404;VLG7_000981;VLG10_000761;VLG5_001325;VLG8_000678;VLG8_001139;VLG12_000692;VLG10_001301;VLG1_001297;VLG11_000194;VLG6_001730;VLG9_000345;VL…	1.38919
GO:0006811	monoatomic ion transport	BP	250/7692	665/24793	250/665	Leaf_vs_Stem	0.000201691	0.0111979	VLG10_001147;VLG6_000914;VLG12_001408;VLG6_000686;VLG1_000246;VLG12_000814;VLG3_000749;VLG10_001616;VLG10_001453;VLG11_000337;VLG3_000795;VLG9_000301;VLG6_001534;VLG2_001584;VLG7_000770;VLG12_001228;VLG6_000580;VLG7_001375;VLG8_000406;VLG1_001531;VLG9_001670;VLG2_000984;VLG6_000645;VLG10_000318;VLG9_001737;VLG2_001295;VLG12_000679;VLG2_000938;VLG4_000459;VLG10_001003;VLG12_001093;VLG9_000231;VLG3…	1.21861
GO:0046283	anthocyanin-containing compound metabolic process	BP	37/7692	71/24793	37/71	Leaf_vs_Stem	0.000197372	0.0110465	VLG12_001385;VLG1_000750;VLG10_001693;VLG10_001696;VLG2_001274;VLG7_001510;VLG7_001498;VLG2_001277;VLG3_000454;VLG4_001509;VLG10_001156;VLG2_001279;VLG4_001511;VLG10_001157;VLG10_001697;VLG10_001695;VLG2_001278;VLG11_000751;VLG7_001509;VLG4_001510;VLG4_001502;VLG10_001700;VLG4_001508;VLG7_001511;VLG2_001273;VLG2_001281;VLG5_002176;VLG10_000577;VLG10_001689;VLG4_000318;VLG7_001211;VLG3_001142;VLG7…	1.6849
GO:0050801	monoatomic ion homeostasis	BP	118/7692	286/24793	118/286	Leaf_vs_Stem	0.000188936	0.0106603	VLG12_000814;VLG10_001453;VLG4_000629;VLG12_001228;VLG2_001584;VLG8_000406;VLG7_000770;VLG2_000071;VLG12_000679;VLG4_000459;VLG7_001230;VLG11_001169;VLG2_002296;VLG12_000626;VLG2_000133;VLG11_001395;VLG5_001252;VLG9_001053;VLG11_000997;VLG3_000089;VLG1_001508;VLG2_001247;VLG3_001516;VLG8_000498;VLG2_000159;VLG1_001951;VLG11_000029;VLG2_002158;VLG12_001932;VLG2_002287;VLG9_000924;VLG5_000181;VLG2_…	1.33373
GO:0055080	monoatomic cation homeostasis	BP	101/7692	239/24793	101/239	Leaf_vs_Stem	0.000188411	0.0106603	VLG12_000814;VLG2_001584;VLG8_000406;VLG12_001228;VLG7_000770;VLG2_000071;VLG4_000459;VLG7_001230;VLG11_001169;VLG2_002296;VLG12_000626;VLG2_000133;VLG11_001395;VLG5_001252;VLG9_001053;VLG11_000997;VLG3_000089;VLG2_001247;VLG3_001516;VLG2_000159;VLG1_001951;VLG11_000029;VLG2_002158;VLG2_002287;VLG9_000924;VLG5_000181;VLG2_000156;VLG2_002286;VLG2_000070;VLG10_001738;VLG1_002302;VLG1_001338;VLG6_00…	1.3657
GO:0007178	cell surface receptor protein serine/threonine kinase signaling pathway	BP	86/7692	198/24793	86/198	Leaf_vs_Stem	0.000183796	0.0105417	VLG6_001548;VLG4_000449;VLG2_000788;VLG9_000419;VLG8_002170;VLG4_000038;VLG12_000660;VLG10_001049;VLG8_002171;VLG4_000362;VLG2_000378;VLG10_000674;VLG5_000080;VLG2_000159;VLG8_000143;VLG2_000802;VLG2_002158;VLG7_000257;VLG4_000210;VLG2_000796;VLG2_000389;VLG2_000070;VLG3_000154;VLG11_000706;VLG2_000171;VLG7_001895;VLG2_001013;VLG3_001606;VLG12_000024;VLG6_001248;VLG2_001545;VLG2_001710;VLG8_00018…	1.40343
GO:0010065	primary meristem tissue development	BP	27/7692	47/24793	27/47	Leaf_vs_Stem	0.000176142	0.0101869	VLG11_000496;VLG5_001389;VLG11_000487;VLG11_000657;VLG1_001075;VLG11_000486;VLG2_001507;VLG11_000512;VLG11_000501;VLG1_002217;VLG11_000488;VLG9_000605;VLG11_000509;VLG11_000482;VLG11_000490;VLG10_001251;VLG11_000505;VLG11_000511;VLG5_000857;VLG11_000504;VLG11_000484;VLG11_000491;VLG11_000483;VLG11_000489;VLG11_000508;VLG6_001059;VLG11_000494	1.85867
GO:0010114	response to red light	BP	28/7692	49/24793	28/49	Leaf_vs_Stem	0.000152099	0.00917884	VLG10_000459;VLG6_001367;VLG10_001300;VLG11_000866;VLG9_000591;VLG1_002064;VLG9_000378;VLG6_000711;VLG6_001065;VLG10_001301;VLG11_000751;VLG1_001271;VLG11_001420;VLG2_001466;VLG11_001727;VLG9_000836;VLG6_000410;VLG1_000661;VLG12_000134;VLG1_000289;VLG5_001004;VLG4_000248;VLG1_000974;VLG8_002106;VLG5_002246;VLG11_000825;VLG6_001003;VLG2_000636	1.84861
GO:0008299	isoprenoid biosynthetic process	BP	79/7692	178/24793	79/178	Leaf_vs_Stem	0.000142296	0.00881725	VLG3_001044;VLG11_001136;VLG1_000308;VLG9_000378;VLG9_001633;VLG1_001515;VLG3_001135;VLG7_000511;VLG2_000932;VLG5_001593;VLG1_000537;VLG12_000438;VLG1_000809;VLG3_000903;VLG8_001833;VLG8_000121;VLG6_001714;VLG6_001704;VLG2_001927;VLG6_001520;VLG5_002246;VLG12_001416;VLG6_000802;VLG5_000703;VLG3_000607;VLG8_002124;VLG7_001391;VLG4_000912;VLG9_000841;VLG1_002212;VLG5_000705;VLG5_000157;VLG4_000908;…	1.43408
GO:0048878	chemical homeostasis	BP	171/7692	433/24793	171/433	Leaf_vs_Stem	0.000131459	0.00829389	VLG10_000459;VLG8_001919;VLG12_000814;VLG10_001453;VLG1_000308;VLG1_002243;VLG4_000629;VLG6_001065;VLG2_001899;VLG2_001584;VLG12_001228;VLG8_000406;VLG8_001037;VLG2_000071;VLG6_000645;VLG1_001535;VLG12_000679;VLG6_000593;VLG8_001050;VLG4_000459;VLG7_001230;VLG4_000818;VLG1_000780;VLG11_001169;VLG2_002296;VLG12_001247;VLG12_000626;VLG2_000133;VLG11_001395;VLG6_000548;VLG6_001140;VLG5_001252;VLG9_0…	1.27826
GO:0006955	immune response	BP	165/7692	415/24793	165/415	Leaf_vs_Stem	0.000115231	0.00733675	VLG12_001385;VLG3_000779;VLG7_000854;VLG6_000686;VLG7_001278;VLG3_000416;VLG11_000193;VLG11_000207;VLG2_000346;VLG8_001669;VLG4_000025;VLG2_001610;VLG12_002049;VLG11_000100;VLG1_000202;VLG8_002052;VLG7_000790;VLG3_000318;VLG4_000712;VLG2_002021;VLG11_000195;VLG8_002008;VLG11_000336;VLG1_000450;VLG11_000198;VLG5_000209;VLG6_001714;VLG6_001228;VLG8_002159;VLG6_001704;VLG12_000626;VLG10_000213;VLG6_…	1.28683
GO:0046916	obsolete intracellular transition metal ion homeostasis	BP	30/7692	53/24793	30/53	Leaf_vs_Stem	0.000113012	0.00726206	VLG1_000242;VLG12_000720;VLG2_001584;VLG1_002302;VLG1_002281;VLG8_000891;VLG6_001598;VLG2_001580;VLG3_001582;VLG3_001532;VLG4_000459;VLG12_001607;VLG7_000541;VLG8_000784;VLG3_001145;VLG1_002280;VLG12_002314;VLG2_001961;VLG11_001169;VLG12_000626;VLG11_001395;VLG11_000997;VLG3_001516;VLG7_001709;VLG5_001719;VLG7_000785;VLG3_001531;VLG11_000029;VLG12_001559;VLG1_000315	1.83078
GO:0051187	obsolete cofactor catabolic process	BP	28/7692	48/24793	28/48	Leaf_vs_Stem	9.267e-05	0.00606726	VLG1_001232;VLG2_000943;VLG1_000679;VLG2_000942;VLG1_000366;VLG12_001802;VLG12_002049;VLG1_002270;VLG12_001804;VLG12_002057;VLG6_001602;VLG8_002124;VLG9_001191;VLG12_000304;VLG12_002041;VLG7_001576;VLG10_000129;VLG12_002055;VLG1_000661;VLG1_001804;VLG6_001603;VLG10_001376;VLG12_001803;VLG8_001855;VLG7_000530;VLG1_001230;VLG2_000944;VLG7_000113	1.88688
GO:0006778	porphyrin-containing compound metabolic process	BP	32/7692	57/24793	32/57	Leaf_vs_Stem	8.36519e-05	0.00558216	VLG1_000515;VLG2_000943;VLG7_000991;VLG3_001044;VLG2_000942;VLG5_000018;VLG12_002049;VLG12_002057;VLG8_001063;VLG9_001758;VLG8_002124;VLG9_001191;VLG12_000304;VLG12_002041;VLG7_001576;VLG11_000556;VLG12_002055;VLG12_001662;VLG1_002168;VLG1_000661;VLG1_001128;VLG5_001505;VLG11_000567;VLG10_001376;VLG8_001855;VLG3_000201;VLG9_000729;VLG1_002199;VLG9_001410;VLG12_000928;VLG2_000944;VLG7_000770	1.81548
GO:0002239	response to oomycetes	BP	33/7692	59/24793	33/59	Leaf_vs_Stem	7.18867e-05	0.00484801	VLG2_000725;VLG5_001325;VLG8_000260;VLG7_001515;VLG11_000193;VLG11_001022;VLG2_000726;VLG11_000207;VLG2_000724;VLG11_000194;VLG11_000206;VLG7_001310;VLG11_000191;VLG11_000204;VLG11_000197;VLG11_000187;VLG11_000195;VLG6_000017;VLG6_000290;VLG7_001518;VLG11_000198;VLG8_001156;VLG11_001527;VLG1_002294;VLG12_000660;VLG2_000721;VLG22_000001;VLG9_001568;VLG11_000200;VLG3_000031;VLG9_001720;VLG11_000882…	1.80862
GO:0009735	response to cytokinin	BP	88/7692	199/24793	88/199	Leaf_vs_Stem	7.19517e-05	0.00484801	VLG7_000862;VLG7_001180;VLG2_001100;VLG9_000794;VLG10_001923;VLG6_001065;VLG4_001358;VLG7_001183;VLG5_001196;VLG7_001509;VLG1_002173;VLG1_001222;VLG7_000127;VLG10_000999;VLG6_001892;VLG12_001488;VLG5_001505;VLG11_001886;VLG8_000320;VLG10_000690;VLG7_001498;VLG7_001176;VLG1_000173;VLG2_000259;VLG1_001558;VLG12_001689;VLG2_001370;VLG8_001307;VLG11_001874;VLG1_001977;VLG5_001041;VLG3_000006;VLG4_001…	1.42932
GO:0055065	obsolete metal ion homeostasis	BP	87/7692	196/24793	87/196	Leaf_vs_Stem	6.69135e-05	0.00459782	VLG12_000814;VLG2_001584;VLG12_001228;VLG2_000071;VLG4_000459;VLG7_001230;VLG11_001169;VLG2_002296;VLG12_000626;VLG2_000133;VLG11_001395;VLG5_001252;VLG9_001053;VLG11_000997;VLG3_000089;VLG2_001247;VLG3_001516;VLG2_000159;VLG1_001951;VLG11_000029;VLG2_002158;VLG2_002287;VLG2_000156;VLG2_002286;VLG2_000070;VLG10_001738;VLG1_002302;VLG1_001338;VLG6_000511;VLG8_000891;VLG2_000171;VLG3_001582;VLG1_00…	1.43471
GO:0071365	cellular response to auxin stimulus	BP	56/7692	115/24793	56/115	Leaf_vs_Stem	6.51073e-05	0.00451845	VLG12_000149;VLG1_000230;VLG10_001300;VLG1_000723;VLG8_000807;VLG7_000845;VLG1_002154;VLG8_000678;VLG8_000512;VLG10_001301;VLG1_001882;VLG8_002178;VLG11_000106;VLG3_001325;VLG2_000070;VLG6_000298;VLG7_000740;VLG6_000531;VLG2_000168;VLG8_000662;VLG2_000074;VLG1_002155;VLG4_000234;VLG4_000434;VLG1_001977;VLG1_000596;VLG2_000887;VLG2_000171;VLG5_000445;VLG2_000135;VLG5_000998;VLG8_000758;VLG8_001873…	1.57369
GO:0055076	obsolete transition metal ion homeostasis	BP	43/7692	82/24793	43/82	Leaf_vs_Stem	5.10315e-05	0.00361386	VLG5_000142;VLG1_000242;VLG12_001228;VLG2_001584;VLG12_000720;VLG7_000770;VLG10_001738;VLG1_002302;VLG1_001338;VLG6_000511;VLG1_002281;VLG8_000891;VLG1_000511;VLG6_001598;VLG3_001582;VLG2_001580;VLG3_001532;VLG4_000459;VLG12_001607;VLG7_001230;VLG7_000541;VLG8_000784;VLG3_001145;VLG1_002280;VLG12_002314;VLG11_001169;VLG2_001961;VLG12_000626;VLG7_001229;VLG11_001395;VLG5_001252;VLG11_000997;VLG3_0…	1.69503
GO:0071554	cell wall organization or biogenesis	BP	146/7692	356/24793	146/356	Leaf_vs_Stem	4.96035e-05	0.00358592	VLG6_001789;VLG12_001182;VLG4_000262;VLG11_000019;VLG6_000940;VLG2_000788;VLG6_000588;VLG1_001004;VLG7_000790;VLG1_001431;VLG9_000419;VLG6_000934;VLG1_001423;VLG8_001693;VLG5_002117;VLG1_001492;VLG10_001456;VLG2_000867;VLG1_002327;VLG6_001591;VLG6_001714;VLG10_000664;VLG6_001704;VLG7_000612;VLG5_000541;VLG3_000840;VLG7_001835;VLG4_000362;VLG10_000308;VLG5_002124;VLG11_001245;VLG12_000163;VLG2_001…	1.32735
GO:0033013	tetrapyrrole metabolic process	BP	33/7692	58/24793	33/58	Leaf_vs_Stem	4.51401e-05	0.0032976	VLG1_000515;VLG2_000943;VLG7_000991;VLG3_001044;VLG2_000942;VLG5_000018;VLG12_002049;VLG12_002057;VLG8_001063;VLG9_001758;VLG8_002124;VLG9_001191;VLG12_000304;VLG12_002041;VLG7_001576;VLG11_000556;VLG12_002055;VLG12_001662;VLG1_002168;VLG1_000661;VLG1_001128;VLG5_001505;VLG11_000567;VLG10_001376;VLG8_001855;VLG3_000201;VLG9_000729;VLG1_002199;VLG9_001410;VLG4_000772;VLG12_000928;VLG2_000944;VLG7_…	1.83968
GO:0010200	response to chitin	BP	64/7692	134/24793	64/134	Leaf_vs_Stem	4.32598e-05	0.00319386	VLG9_000781;VLG12_000643;VLG3_001053;VLG10_001378;VLG7_001231;VLG7_000826;VLG2_002085;VLG8_001139;VLG11_001184;VLG10_000171;VLG6_000253;VLG12_000066;VLG12_000461;VLG10_000519;VLG6_002090;VLG5_001563;VLG1_000051;VLG3_000560;VLG3_001098;VLG7_001310;VLG7_001895;VLG10_001050;VLG3_000787;VLG1_000834;VLG12_000456;VLG2_002146;VLG12_001692;VLG7_001660;VLG7_000377;VLG12_000646;VLG12_001098;VLG6_001594;VLG…	1.54358
GO:0055085	transmembrane transport	BP	334/7692	897/24793	334/897	Leaf_vs_Stem	4.26972e-05	0.00318622	VLG6_000914;VLG12_000814;VLG11_000948;VLG2_001584;VLG7_001375;VLG2_000984;VLG2_000938;VLG7_001518;VLG5_000598;VLG1_000430;VLG5_001252;VLG5_000867;VLG7_000238;VLG8_000498;VLG10_000765;VLG4_001471;VLG5_001325;VLG4_001479;VLG7_001515;VLG1_000475;VLG1_002302;VLG12_001689;VLG8_000891;VLG12_000757;VLG6_001168;VLG1_001240;VLG1_002106;VLG7_000085;VLG8_002137;VLG7_000799;VLG2_000449;VLG8_000285;VLG8_00006…	1.21082
GO:0045087	innate immune response	BP	160/7692	394/24793	160/394	Leaf_vs_Stem	4.09369e-05	0.00308806	VLG12_001385;VLG3_000779;VLG7_000854;VLG6_000686;VLG7_001278;VLG3_000416;VLG11_000193;VLG11_000207;VLG2_000346;VLG8_001669;VLG4_000025;VLG2_001610;VLG12_002049;VLG11_000100;VLG8_002052;VLG7_000790;VLG3_000318;VLG4_000712;VLG2_002021;VLG11_000195;VLG11_000336;VLG1_000450;VLG11_000198;VLG5_000209;VLG6_001714;VLG6_001228;VLG8_002159;VLG6_001704;VLG12_000626;VLG10_000213;VLG6_000683;VLG8_002086;VLG6_…	1.31491
GO:0006833	water transport	BP	50/7692	98/24793	50/98	Leaf_vs_Stem	3.39003e-05	0.00261409	VLG7_001163;VLG2_000128;VLG7_001740;VLG5_001382;VLG2_002287;VLG7_001055;VLG11_000337;VLG1_002203;VLG12_002342;VLG12_000603;VLG10_001748;VLG5_000508;VLG2_000156;VLG2_002286;VLG2_000070;VLG2_000168;VLG1_001947;VLG2_000074;VLG2_000071;VLG2_000171;VLG2_000135;VLG11_000250;VLG2_002289;VLG3_001211;VLG2_000134;VLG7_000591;VLG7_000592;VLG2_002296;VLG3_001619;VLG2_000133;VLG2_002283;VLG2_000078;VLG2_00015…	1.64902
GO:0042044	fluid transport	BP	50/7692	98/24793	50/98	Leaf_vs_Stem	3.39003e-05	0.00261409	VLG7_001163;VLG2_000128;VLG7_001740;VLG5_001382;VLG2_002287;VLG7_001055;VLG11_000337;VLG1_002203;VLG12_002342;VLG12_000603;VLG10_001748;VLG5_000508;VLG2_000156;VLG2_002286;VLG2_000070;VLG2_000168;VLG1_001947;VLG2_000074;VLG2_000071;VLG2_000171;VLG2_000135;VLG11_000250;VLG2_002289;VLG3_001211;VLG2_000134;VLG7_000591;VLG7_000592;VLG2_002296;VLG3_001619;VLG2_000133;VLG2_002283;VLG2_000078;VLG2_00015…	1.64902
GO:0006721	terpenoid metabolic process	BP	86/7692	190/24793	86/190	Leaf_vs_Stem	3.08461e-05	0.00243264	VLG8_001919;VLG3_001044;VLG11_001136;VLG1_000308;VLG9_000378;VLG9_001633;VLG1_001515;VLG7_000511;VLG2_000932;VLG5_001593;VLG1_000537;VLG12_000438;VLG1_000809;VLG3_000903;VLG8_001833;VLG6_001520;VLG5_002246;VLG12_000928;VLG12_001416;VLG6_000802;VLG12_001932;VLG5_000703;VLG3_000607;VLG8_002124;VLG7_001391;VLG10_000819;VLG4_000912;VLG7_000656;VLG9_000841;VLG1_002212;VLG5_000705;VLG5_000157;VLG4_0009…	1.46332
GO:0042548	regulation of photosynthesis, light reaction	BP	16/7692	21/24793	16/21	Leaf_vs_Stem	2.91604e-05	0.00232613	VLG4_001445;VLG5_001289;VLG8_000331;VLG1_000172;VLG4_000652;VLG4_000426;VLG7_001969;VLG2_000923;VLG8_002353;VLG5_002179;VLG7_001735;VLG1_000173;VLG10_000690;VLG5_002183;VLG1_001222;VLG3_000111	2.46197
GO:0051194	obsolete positive regulation of cofactor metabolic process	BP	16/7692	21/24793	16/21	Leaf_vs_Stem	2.91604e-05	0.00232613	VLG6_000290;VLG22_000001;VLG3_001256;VLG2_000725;VLG9_001568;VLG3_001259;VLG1_000974;VLG9_001720;VLG1_000661;VLG2_000726;VLG2_000724;VLG6_001065;VLG4_000772;VLG2_000721;VLG6_000017;VLG7_000893	2.46197
GO:1901700	response to oxygen-containing compound	BP	536/7692	1492/24793	536/1492	Leaf_vs_Stem	2.1823e-05	0.001803	VLG10_000459;VLG7_001180;VLG5_000666;VLG10_001453;VLG7_001231;VLG8_000830;VLG3_000037;VLG11_000207;VLG6_001065;VLG5_001526;VLG9_000131;VLG1_000537;VLG5_000660;VLG10_001848;VLG5_000677;VLG10_000989;VLG1_001535;VLG5_000676;VLG1_000809;VLG6_001237;VLG6_001228;VLG11_001857;VLG6_000548;VLG6_001520;VLG3_000286;VLG5_000541;VLG3_001142;VLG7_000238;VLG1_001340;VLG3_001125;VLG8_000498;VLG7_001503;VLG2_0001…	1.17441
GO:1901657	glycosyl compound metabolic process	BP	108/7692	247/24793	108/247	Leaf_vs_Stem	2.09737e-05	0.00175371	VLG5_000278;VLG8_001919;VLG2_001282;VLG9_001495;VLG4_001511;VLG4_000889;VLG5_001706;VLG7_001509;VLG12_000438;VLG12_001325;VLG5_000287;VLG5_002030;VLG6_001714;VLG6_001704;VLG1_001445;VLG9_001496;VLG12_002144;VLG12_001322;VLG1_001444;VLG5_001711;VLG11_001195;VLG3_001125;VLG6_000452;VLG9_000392;VLG5_000276;VLG2_001274;VLG7_001498;VLG4_001509;VLG5_000284;VLG10_000882;VLG2_001278;VLG4_001502;VLG4_0008…	1.4144
GO:0009734	auxin-activated signaling pathway	BP	51/7692	99/24793	51/99	Leaf_vs_Stem	2.01945e-05	0.00170915	VLG1_000230;VLG10_001300;VLG1_000723;VLG8_000807;VLG7_000845;VLG1_002154;VLG8_000678;VLG8_000512;VLG10_001301;VLG1_001882;VLG8_002178;VLG11_000106;VLG6_000298;VLG2_000070;VLG2_000168;VLG7_000740;VLG6_000531;VLG8_000662;VLG2_000074;VLG1_002155;VLG4_000234;VLG4_000434;VLG2_000887;VLG2_000171;VLG5_000445;VLG2_000135;VLG5_000998;VLG8_000758;VLG8_001873;VLG11_000209;VLG12_002141;VLG8_000509;VLG2_00015…	1.66507
GO:0042742	defense response to bacterium	BP	183/7692	454/24793	183/454	Leaf_vs_Stem	1.97342e-05	0.00169081	VLG12_001385;VLG3_000779;VLG7_000862;VLG7_000854;VLG6_000686;VLG3_000416;VLG8_000830;VLG3_000037;VLG11_001469;VLG2_000788;VLG10_001923;VLG1_001211;VLG4_000025;VLG5_000625;VLG12_002049;VLG11_000100;VLG8_002052;VLG6_000523;VLG12_002182;VLG9_000419;VLG5_000621;VLG1_000450;VLG9_000291;VLG5_000209;VLG6_001714;VLG7_001665;VLG7_000437;VLG6_001704;VLG1_001273;VLG12_001488;VLG5_002154;VLG5_000647;VLG6_000…	1.30645
GO:0006979	response to oxidative stress	BP	155/7692	374/24793	155/374	Leaf_vs_Stem	1.51637e-05	0.0013321	VLG1_000515;VLG7_001180;VLG1_001232;VLG7_000854;VLG12_002246;VLG3_000416;VLG10_000241;VLG8_000639;VLG3_000923;VLG7_001183;VLG1_001531;VLG5_001593;VLG3_000833;VLG10_001848;VLG6_001237;VLG10_000231;VLG3_001424;VLG11_000755;VLG5_000407;VLG7_000127;VLG2_001121;VLG1_000450;VLG12_000626;VLG11_001395;VLG2_001624;VLG12_000606;VLG8_000151;VLG8_002190;VLG5_001185;VLG1_001340;VLG12_002131;VLG1_001230;VLG5_0…	1.34241
GO:0010033	response to organic substance	BP	628/7692	1765/24793	628/1765	Leaf_vs_Stem	1.47166e-05	0.00132237	VLG10_000459;VLG7_000862;VLG7_001180;VLG5_000666;VLG7_001231;VLG8_000830;VLG3_000037;VLG1_002154;VLG11_000207;VLG10_001923;VLG6_001065;VLG5_001526;VLG9_000131;VLG1_000537;VLG5_000660;VLG10_001848;VLG5_000677;VLG10_000989;VLG1_001535;VLG5_000676;VLG1_000809;VLG5_000445;VLG2_000887;VLG3_000653;VLG6_001228;VLG3_000662;VLG11_001857;VLG6_000548;VLG6_001520;VLG5_001505;VLG6_000903;VLG10_000877;VLG3_000…	1.16609
GO:0046677	response to antibiotic	BP	130/7692	305/24793	130/305	Leaf_vs_Stem	1.48624e-05	0.00132237	VLG7_000854;VLG1_001232;VLG3_000416;VLG11_000193;VLG8_000830;VLG3_000037;VLG11_000207;VLG8_000639;VLG5_001526;VLG3_000923;VLG2_001610;VLG4_001177;VLG9_000874;VLG11_000753;VLG6_001237;VLG10_000231;VLG11_000195;VLG1_000450;VLG11_000198;VLG5_000209;VLG10_000213;VLG12_000660;VLG11_001381;VLG11_000200;VLG1_001230;VLG6_002043;VLG11_000882;VLG3_001003;VLG3_001404;VLG7_000981;VLG10_000761;VLG11_001749;VL…	1.37969
GO:0009813	flavonoid biosynthetic process	BP	56/7692	110/24793	56/110	Leaf_vs_Stem	1.27707e-05	0.00118172	VLG2_000243;VLG11_001145;VLG2_000244;VLG1_000750;VLG10_001693;VLG10_001696;VLG9_001460;VLG2_000246;VLG7_001498;VLG7_000172;VLG7_001510;VLG3_000454;VLG4_001509;VLG11_001885;VLG6_000621;VLG10_001156;VLG2_000245;VLG2_000250;VLG11_001599;VLG11_001596;VLG4_001511;VLG10_001157;VLG10_001697;VLG10_001695;VLG7_001509;VLG4_001510;VLG4_001502;VLG11_001597;VLG2_002127;VLG10_001700;VLG4_001508;VLG7_001511;VLG…	1.64557
GO:0042221	response to chemical	BP	881/7692	2535/24793	881/2535	Leaf_vs_Stem	1.21684e-05	0.0011412	VLG10_000459;VLG7_000862;VLG7_001180;VLG5_000666;VLG10_001453;VLG7_001231;VLG8_000830;VLG3_000037;VLG1_002154;VLG11_000207;VLG10_001923;VLG6_001065;VLG5_001526;VLG2_001584;VLG6_000588;VLG8_002052;VLG6_000237;VLG9_000131;VLG1_000537;VLG5_000660;VLG8_000912;VLG10_001848;VLG5_000677;VLG1_001535;VLG5_000676;VLG1_000809;VLG5_000445;VLG2_000887;VLG10_000989;VLG6_001237;VLG7_001518;VLG9_001157;VLG10_000…	1.14564
GO:0009642	response to light intensity	BP	70/7692	143/24793	70/143	Leaf_vs_Stem	6.72054e-06	0.000665005	VLG10_000459;VLG1_000172;VLG4_000652;VLG10_001300;VLG2_001128;VLG9_000591;VLG8_000260;VLG10_000833;VLG11_000193;VLG12_000966;VLG11_000207;VLG1_000173;VLG2_002085;VLG10_001301;VLG2_001625;VLG5_002179;VLG12_002303;VLG4_001445;VLG5_001289;VLG10_001197;VLG9_001158;VLG8_000196;VLG11_000194;VLG11_001814;VLG11_000751;VLG11_000206;VLG3_000560;VLG1_000511;VLG11_000191;VLG6_002015;VLG11_000204;VLG1_000005;…	1.58268
GO:0009888	tissue development	BP	274/7692	706/24793	274/706	Leaf_vs_Stem	6.80336e-06	0.000665005	VLG2_001100;VLG10_001493;VLG5_001389;VLG3_000878;VLG4_000395;VLG2_000788;VLG5_001876;VLG10_000317;VLG4_001358;VLG4_000959;VLG9_000629;VLG8_001037;VLG9_000194;VLG2_000071;VLG7_000790;VLG1_001854;VLG9_000419;VLG10_000214;VLG2_000887;VLG5_000445;VLG9_000212;VLG9_000605;VLG11_000509;VLG11_000482;VLG4_001434;VLG3_000230;VLG10_001456;VLG11_001148;VLG4_000966;VLG11_000505;VLG2_000852;VLG6_001468;VLG2_00…	1.26183
GO:0015994	chlorophyll metabolic process	BP	28/7692	43/24793	28/43	Leaf_vs_Stem	4.89653e-06	0.000492491	VLG1_000515;VLG2_000943;VLG7_000991;VLG3_001044;VLG2_000942;VLG5_000018;VLG12_002049;VLG12_002057;VLG8_001063;VLG9_001758;VLG9_001191;VLG12_000304;VLG12_002041;VLG7_001576;VLG11_000556;VLG12_002055;VLG12_001662;VLG1_002168;VLG1_000661;VLG5_001505;VLG10_001376;VLG8_001855;VLG3_000201;VLG9_000729;VLG1_002199;VLG9_001410;VLG12_000928;VLG2_000944	2.10461
GO:0009812	flavonoid metabolic process	BP	72/7692	146/24793	72/146	Leaf_vs_Stem	3.55813e-06	0.000368558	VLG12_001385;VLG2_000243;VLG2_000244;VLG1_000750;VLG10_001693;VLG10_001696;VLG9_001460;VLG2_000246;VLG11_001145;VLG10_000739;VLG2_001274;VLG7_000172;VLG7_001498;VLG7_001510;VLG3_000454;VLG4_001509;VLG2_001277;VLG11_001885;VLG6_000621;VLG10_001156;VLG2_000245;VLG2_000091;VLG2_000250;VLG11_001599;VLG2_001279;VLG11_001596;VLG4_001511;VLG10_001157;VLG10_001697;VLG10_001695;VLG7_001509;VLG11_000751;VL…	1.5947
GO:0006720	isoprenoid metabolic process	BP	102/7692	223/24793	102/223	Leaf_vs_Stem	3.33325e-06	0.000350496	VLG8_001919;VLG3_001044;VLG11_001136;VLG1_000308;VLG9_000378;VLG9_001633;VLG1_001515;VLG3_001135;VLG7_000511;VLG2_000932;VLG5_001593;VLG1_000537;VLG12_000438;VLG1_000809;VLG3_000903;VLG8_001833;VLG8_000121;VLG6_001714;VLG6_001704;VLG2_001927;VLG6_001520;VLG5_002246;VLG12_000928;VLG12_001416;VLG6_000802;VLG12_001932;VLG5_000703;VLG3_000607;VLG8_002124;VLG7_001391;VLG10_000819;VLG4_000912;VLG7_0006…	1.48023
GO:0010109	regulation of photosynthesis	BP	25/7692	36/24793	25/36	Leaf_vs_Stem	2.71448e-06	0.000289823	VLG1_000172;VLG4_000652;VLG1_000699;VLG11_000947;VLG1_000173;VLG2_001625;VLG3_000111;VLG5_002179;VLG4_001445;VLG5_001289;VLG4_000426;VLG1_001272;VLG5_002183;VLG1_001492;VLG1_001222;VLG11_000784;VLG2_000923;VLG8_002353;VLG1_000661;VLG11_000849;VLG7_001735;VLG8_000331;VLG7_001969;VLG5_001699;VLG10_000690	2.24374
GO:0009611	response to wounding	BP	138/7692	318/24793	138/318	Leaf_vs_Stem	2.61118e-06	0.000287645	VLG6_000686;VLG11_000193;VLG4_000485;VLG8_000830;VLG11_000207;VLG4_000025;VLG2_000071;VLG5_001593;VLG12_002182;VLG8_001050;VLG10_000530;VLG10_000231;VLG10_000011;VLG11_000195;VLG5_001624;VLG11_000755;VLG11_000198;VLG5_000209;VLG2_002296;VLG4_000318;VLG2_000133;VLG6_001140;VLG12_000606;VLG12_000660;VLG6_000683;VLG3_001142;VLG2_000848;VLG6_001856;VLG11_000200;VLG5_001454;VLG2_000159;VLG6_000452;VLG…	1.406
GO:0046148	pigment biosynthetic process	BP	68/7692	135/24793	68/135	Leaf_vs_Stem	2.56281e-06	0.000286869	VLG6_001158;VLG2_000243;VLG2_000244;VLG1_000515;VLG10_001693;VLG10_001696;VLG1_000750;VLG7_000991;VLG2_000246;VLG3_001044;VLG11_001136;VLG7_001498;VLG10_000045;VLG7_001510;VLG2_001656;VLG3_000454;VLG4_001509;VLG9_001633;VLG10_001156;VLG2_000245;VLG1_001515;VLG2_000250;VLG5_000018;VLG4_001511;VLG10_001157;VLG10_001697;VLG10_001695;VLG7_001509;VLG8_001063;VLG9_001758;VLG4_001502;VLG4_001510;VLG2_00…	1.62878
GO:0000302	response to reactive oxygen species	BP	94/7692	199/24793	94/199	Leaf_vs_Stem	1.45378e-06	0.000165397	VLG7_000854;VLG1_001232;VLG12_002246;VLG3_000416;VLG10_000241;VLG8_000639;VLG3_000923;VLG1_001531;VLG5_001593;VLG6_001237;VLG10_000231;VLG3_001424;VLG11_000755;VLG1_000450;VLG12_000626;VLG11_001395;VLG11_001381;VLG1_001230;VLG3_001003;VLG3_001404;VLG5_000239;VLG5_001325;VLG8_000678;VLG10_001301;VLG12_000692;VLG1_001558;VLG8_000891;VLG8_000784;VLG6_001199;VLG12_000619;VLG3_000535;VLG12_000329;VLG1…	1.52864
GO:0009605	response to external stimulus	BP	505/7692	1369/24793	505/1369	Leaf_vs_Stem	1.38207e-06	0.00015986	VLG6_000914;VLG7_000862;VLG2_000244;VLG7_001180;VLG8_001250;VLG11_000948;VLG8_000830;VLG3_000037;VLG11_000207;VLG2_000788;VLG10_001923;VLG8_001669;VLG11_001168;VLG8_002052;VLG11_000751;VLG6_000299;VLG10_000989;VLG9_000419;VLG5_000445;VLG8_001050;VLG6_001237;VLG8_002008;VLG7_001518;VLG6_001714;VLG6_001228;VLG7_000437;VLG6_001704;VLG1_001445;VLG4_000318;VLG11_001857;VLG1_000430;VLG1_001444;VLG2_000…	1.20832
GO:0009617	response to bacterium	BP	220/7692	541/24793	220/541	Leaf_vs_Stem	1.37736e-06	0.00015986	VLG12_001385;VLG6_000914;VLG7_000862;VLG3_000779;VLG7_000854;VLG6_000686;VLG3_000416;VLG3_000037;VLG8_000830;VLG11_001469;VLG2_000788;VLG10_001923;VLG1_001211;VLG4_000025;VLG5_000625;VLG12_002049;VLG11_000100;VLG8_002052;VLG6_000523;VLG5_001593;VLG12_002182;VLG9_000419;VLG8_002146;VLG5_000621;VLG11_000755;VLG7_001230;VLG8_002008;VLG1_000450;VLG9_000291;VLG5_000209;VLG6_001714;VLG7_001665;VLG7_000…	1.3213
GO:0009658	chloroplast organization	BP	74/7692	148/24793	74/148	Leaf_vs_Stem	1.35113e-06	0.00015986	VLG3_000355;VLG6_001367;VLG6_000052;VLG1_000699;VLG2_001656;VLG7_000991;VLG6_001838;VLG10_000895;VLG10_001180;VLG3_000282;VLG2_000306;VLG6_001065;VLG5_000152;VLG11_000877;VLG2_001625;VLG5_001320;VLG1_000422;VLG3_000764;VLG5_001174;VLG12_001689;VLG2_001370;VLG12_002182;VLG7_000936;VLG11_000751;VLG2_000221;VLG8_002293;VLG2_001351;VLG10_000894;VLG8_000148;VLG1_001271;VLG12_002209;VLG6_000747;VLG12_0…	1.61721
GO:0009314	response to radiation	BP	246/7692	614/24793	246/614	Leaf_vs_Stem	1.30519e-06	0.000158912	VLG10_000459;VLG6_001367;VLG1_001232;VLG9_000591;VLG10_000895;VLG11_000193;VLG8_002273;VLG8_000830;VLG9_000378;VLG11_000207;VLG10_001923;VLG6_001065;VLG5_000021;VLG4_000416;VLG1_001146;VLG3_000923;VLG5_000809;VLG5_001289;VLG7_000775;VLG11_000100;VLG1_001560;VLG7_000511;VLG8_000912;VLG11_000751;VLG8_001717;VLG9_001159;VLG8_001027;VLG11_000753;VLG8_001872;VLG6_000164;VLG2_001466;VLG5_002183;VLG10_0…	1.30289
GO:0009416	response to light stimulus	BP	230/7692	565/24793	230/565	Leaf_vs_Stem	7.19646e-07	9.42328e-05	VLG10_000459;VLG6_001367;VLG1_001232;VLG9_000591;VLG10_000895;VLG11_000193;VLG8_002273;VLG8_000830;VLG9_000378;VLG11_000207;VLG10_001923;VLG6_001065;VLG5_000021;VLG4_000416;VLG1_001146;VLG3_000923;VLG5_001289;VLG7_000775;VLG11_000100;VLG1_001560;VLG7_000511;VLG8_000912;VLG11_000751;VLG8_001717;VLG9_001159;VLG8_001027;VLG11_000753;VLG8_001872;VLG6_000164;VLG2_001466;VLG5_002183;VLG10_000011;VLG12_…	1.32355
GO:0098542	defense response to other organism	BP	298/7692	757/24793	298/757	Leaf_vs_Stem	6.28841e-07	8.39261e-05	VLG12_001385;VLG3_000779;VLG7_000862;VLG3_001304;VLG6_000686;VLG7_000854;VLG3_000416;VLG11_000193;VLG3_000037;VLG8_000830;VLG11_000207;VLG11_001469;VLG2_000788;VLG10_001923;VLG2_000726;VLG1_001211;VLG8_001669;VLG4_000025;VLG5_000625;VLG2_001610;VLG11_000100;VLG7_001595;VLG12_002049;VLG8_002052;VLG6_000523;VLG7_000790;VLG12_002182;VLG9_000419;VLG8_001050;VLG5_000621;VLG11_000195;VLG5_000407;VLG11_…	1.28275
GO:0009628	response to abiotic stimulus	BP	615/7692	1688/24793	615/1688	Leaf_vs_Stem	5.67432e-07	7.72153e-05	VLG10_000459;VLG7_001180;VLG6_001378;VLG2_001029;VLG10_001453;VLG8_000830;VLG9_000378;VLG11_000207;VLG10_001923;VLG6_001065;VLG1_001146;VLG11_001168;VLG6_000708;VLG5_001289;VLG7_000775;VLG1_001560;VLG8_002052;VLG1_000537;VLG8_000912;VLG10_001848;VLG6_000299;VLG11_000751;VLG9_001159;VLG8_001717;VLG5_000445;VLG8_001872;VLG8_001050;VLG12_001752;VLG10_000011;VLG10_000129;VLG6_001714;VLG7_000437;VLG5_…	1.1979
GO:0006091	generation of precursor metabolites and energy	BP	93/7692	192/24793	93/192	Leaf_vs_Stem	4.07506e-07	5.65618e-05	VLG10_000459;VLG11_000738;VLG19_000005;VLG8_001048;VLG12_001545;VLG6_000549;VLG3_000709;VLG4_001041;VLG1_000297;VLG6_000222;VLG8_001717;VLG1_001423;VLG10_000011;VLG10_000067;VLG1_001222;VLG7_000572;VLG2_000183;VLG8_000528;VLG12_000626;VLG4_000490;VLG24_000028;VLG12_001130;VLG10_000690;VLG4_001198;VLG12_000704;VLG2_000683;VLG12_002181;VLG4_001519;VLG10_001815;VLG6_000711;VLG3_000984;VLG8_002333;VL…	1.56795
GO:0010073	meristem maintenance	BP	105/7692	221/24793	105/221	Leaf_vs_Stem	2.52141e-07	3.57114e-05	VLG10_001493;VLG4_000395;VLG2_000788;VLG4_001358;VLG4_000959;VLG9_000194;VLG9_000419;VLG10_000214;VLG9_000212;VLG3_000230;VLG4_000966;VLG6_001468;VLG11_000386;VLG11_001616;VLG10_001496;VLG4_000362;VLG8_000320;VLG9_000209;VLG10_001495;VLG2_000802;VLG6_000316;VLG9_000214;VLG11_000368;VLG8_001390;VLG11_000369;VLG2_000796;VLG11_000379;VLG3_000907;VLG3_000229;VLG11_001807;VLG2_002249;VLG9_000208;VLG10…	1.53879
GO:0009719	response to endogenous stimulus	BP	532/7692	1432/24793	532/1432	Leaf_vs_Stem	2.42528e-07	3.50655e-05	VLG10_000459;VLG7_000862;VLG7_001180;VLG5_000666;VLG8_000830;VLG3_000037;VLG1_002154;VLG11_000207;VLG10_001923;VLG6_001065;VLG5_001526;VLG9_000131;VLG1_000537;VLG5_000660;VLG10_001848;VLG5_000677;VLG10_000989;VLG1_001535;VLG5_000676;VLG1_000809;VLG5_000445;VLG2_000887;VLG3_000653;VLG6_001228;VLG3_000662;VLG11_001857;VLG6_000548;VLG6_001520;VLG5_001505;VLG6_000903;VLG10_000877;VLG3_001142;VLG7_001…	1.21971
GO:0048507	meristem development	BP	142/7692	316/24793	142/316	Leaf_vs_Stem	1.61473e-07	2.3843e-05	VLG10_001493;VLG5_001389;VLG4_000395;VLG2_000788;VLG5_001876;VLG4_001358;VLG4_000959;VLG9_000194;VLG9_000419;VLG10_000214;VLG2_000887;VLG9_000212;VLG9_000605;VLG11_000509;VLG11_000482;VLG3_000230;VLG4_000966;VLG11_000505;VLG6_001468;VLG11_000386;VLG8_000861;VLG10_001496;VLG11_001616;VLG11_000504;VLG11_000491;VLG4_000362;VLG11_000483;VLG8_000320;VLG9_000209;VLG10_001495;VLG2_000802;VLG6_000316;VLG…	1.45755
GO:0009767	photosynthetic electron transport chain	BP	25/7692	32/24793	25/32	Leaf_vs_Stem	6.24367e-08	9.84797e-06	VLG8_000169;VLG8_001048;VLG7_000020;VLG3_000709;VLG4_001041;VLG3_000984;VLG1_000297;VLG10_000618;VLG1_001942;VLG5_001092;VLG8_000188;VLG10_001916;VLG3_000006;VLG6_000960;VLG7_000019;VLG4_000491;VLG7_000693;VLG8_002353;VLG1_000661;VLG11_000849;VLG4_000490;VLG6_001358;VLG4_000772;VLG4_001198;VLG5_000061	2.5207
GO:0009657	plastid organization	BP	101/7692	205/24793	101/205	Leaf_vs_Stem	4.47516e-08	7.22269e-06	VLG6_001367;VLG10_000895;VLG8_002184;VLG6_001065;VLG3_000764;VLG12_002182;VLG11_000751;VLG10_000542;VLG1_000289;VLG7_000064;VLG5_001124;VLG7_001017;VLG2_000556;VLG10_000690;VLG3_000355;VLG1_000699;VLG7_000991;VLG10_001180;VLG11_000877;VLG12_001149;VLG12_002279;VLG3_000183;VLG5_001174;VLG12_001689;VLG2_001370;VLG7_000936;VLG2_000221;VLG8_000148;VLG12_002209;VLG2_000101;VLG8_000896;VLG1_001227;VLG5…	1.59611
GO:0009765	photosynthesis, light harvesting	BP	22/7692	26/24793	22/26	Leaf_vs_Stem	2.68537e-08	4.54548e-06	VLG10_000459;VLG12_001545;VLG4_001519;VLG6_000711;VLG5_000588;VLG2_000498;VLG10_000406;VLG8_000196;VLG8_001717;VLG8_002114;VLG11_001420;VLG11_001727;VLG10_000011;VLG1_001222;VLG10_001832;VLG1_001373;VLG10_001753;VLG10_000640;VLG6_001003;VLG10_000690;VLG5_001725;VLG12_000704	2.72693
GO:0009725	response to hormone	BP	523/7692	1381/24793	523/1381	Leaf_vs_Stem	1.64258e-08	2.92296e-06	VLG10_000459;VLG7_000862;VLG7_001180;VLG5_000666;VLG8_000830;VLG3_000037;VLG1_002154;VLG11_000207;VLG10_001923;VLG6_001065;VLG5_001526;VLG9_000131;VLG1_000537;VLG5_000660;VLG10_001848;VLG5_000677;VLG10_000989;VLG1_001535;VLG5_000676;VLG1_000809;VLG5_000445;VLG2_000887;VLG3_000653;VLG6_001228;VLG3_000662;VLG11_001857;VLG6_000548;VLG6_001520;VLG5_001505;VLG6_000903;VLG10_000877;VLG3_001142;VLG7_001…	1.24579
GO:0009733	response to auxin	BP	153/7692	335/24793	153/335	Leaf_vs_Stem	1.45011e-08	2.64836e-06	VLG7_000854;VLG1_001232;VLG12_001480;VLG3_000416;VLG5_001389;VLG10_000869;VLG1_002154;VLG1_001890;VLG10_001142;VLG4_000555;VLG12_000874;VLG2_000887;VLG7_001589;VLG5_000445;VLG10_000231;VLG3_001424;VLG3_000652;VLG1_000450;VLG3_001650;VLG3_000653;VLG11_000245;VLG6_001337;VLG12_001247;VLG8_000509;VLG3_000662;VLG8_001445;VLG10_000155;VLG10_000213;VLG6_000903;VLG10_000877;VLG8_000511;VLG8_001907;VLG3_…	1.48319
GO:0042440	pigment metabolic process	BP	90/7692	174/24793	90/174	Leaf_vs_Stem	1.27629e-08	2.3939e-06	VLG12_001385;VLG2_000244;VLG1_000515;VLG10_001693;VLG10_001696;VLG3_001044;VLG11_001136;VLG9_001633;VLG1_001515;VLG2_000250;VLG12_002049;VLG4_001511;VLG7_001509;VLG11_000751;VLG7_001576;VLG1_002168;VLG4_000318;VLG5_001505;VLG10_000877;VLG3_001142;VLG2_001218;VLG11_000882;VLG7_001087;VLG12_001416;VLG2_000944;VLG1_000750;VLG7_000991;VLG2_001274;VLG7_001498;VLG4_001509;VLG10_001156;VLG10_001697;VLG1…	1.67533
GO:0080167	response to karrikin	BP	73/7692	131/24793	73/131	Leaf_vs_Stem	4.92495e-09	9.49422e-07	VLG4_000269;VLG7_001180;VLG9_000898;VLG7_001179;VLG11_000866;VLG9_000591;VLG10_000326;VLG7_000390;VLG7_001175;VLG2_001029;VLG2_001274;VLG3_000075;VLG4_000267;VLG1_002064;VLG7_001176;VLG2_001277;VLG11_001885;VLG8_000388;VLG11_000459;VLG2_001770;VLG11_001413;VLG1_001211;VLG7_001178;VLG10_000618;VLG11_001599;VLG7_001183;VLG8_000139;VLG2_001279;VLG5_001456;VLG12_002235;VLG11_001596;VLG7_001834;VLG4_0…	1.80379
GO:0006952	defense response	BP	390/7692	976/24793	390/976	Leaf_vs_Stem	1.19459e-09	2.3687e-07	VLG6_000914;VLG7_000862;VLG1_000196;VLG2_002280;VLG8_000830;VLG3_000037;VLG11_000207;VLG2_000788;VLG10_001923;VLG8_001669;VLG8_002052;VLG9_000419;VLG8_001050;VLG6_000631;VLG7_001518;VLG6_001714;VLG6_001228;VLG7_000437;VLG6_001704;VLG1_000071;VLG1_001445;VLG1_001444;VLG2_000721;VLG8_001264;VLG7_000370;VLG4_000362;VLG2_001247;VLG8_000498;VLG12_001465;VLG7_001503;VLG5_001454;VLG6_000452;VLG8_000143;…	1.311
GO:0051707	response to other organism	BP	411/7692	1032/24793	411/1032	Leaf_vs_Stem	6.71878e-10	1.37142e-07	VLG6_000914;VLG7_000862;VLG2_000244;VLG8_001250;VLG11_000948;VLG8_000830;VLG3_000037;VLG11_000207;VLG2_000788;VLG10_001923;VLG8_001669;VLG8_002052;VLG9_000419;VLG10_000989;VLG8_001050;VLG6_001237;VLG8_002008;VLG7_001518;VLG6_001714;VLG6_001228;VLG7_000437;VLG6_001704;VLG1_001445;VLG11_001857;VLG1_000430;VLG1_001444;VLG2_000721;VLG7_000370;VLG4_000362;VLG8_000498;VLG12_001465;VLG5_001689;VLG7_0015…	1.30805
GO:0009607	response to biotic stimulus	BP	414/7692	1040/24793	414/1040	Leaf_vs_Stem	6.18182e-10	1.30006e-07	VLG6_000914;VLG7_000862;VLG2_000244;VLG8_001250;VLG11_000948;VLG8_000830;VLG3_000037;VLG11_000207;VLG2_000788;VLG10_001923;VLG8_001669;VLG8_002052;VLG9_000419;VLG10_000989;VLG8_001050;VLG6_001237;VLG8_002008;VLG7_001518;VLG6_001714;VLG6_001228;VLG7_000437;VLG6_001704;VLG1_001445;VLG11_001857;VLG1_000430;VLG1_001444;VLG2_000721;VLG7_000370;VLG4_000362;VLG8_000498;VLG12_001465;VLG5_001689;VLG7_0015…	1.30767
GO:0044550	secondary metabolite biosynthetic process	BP	130/7692	264/24793	130/264	Leaf_vs_Stem	5.59828e-10	1.21413e-07	VLG6_000470;VLG6_001948;VLG10_001616;VLG5_002141;VLG6_000588;VLG1_001890;VLG3_001110;VLG5_001231;VLG5_001706;VLG7_000188;VLG6_000473;VLG3_001330;VLG1_000809;VLG3_001152;VLG3_001150;VLG3_001424;VLG3_000652;VLG11_001601;VLG5_002140;VLG6_001337;VLG8_000690;VLG3_000653;VLG6_001714;VLG6_001892;VLG3_001147;VLG6_001704;VLG1_001445;VLG3_000662;VLG7_001735;VLG8_001445;VLG3_000665;VLG3_001111;VLG1_001444;V…	1.59896
GO:0043207	response to external biotic stimulus	BP	414/7692	1035/24793	414/1035	Leaf_vs_Stem	2.93582e-10	7.02572e-08	VLG6_000914;VLG7_000862;VLG2_000244;VLG8_001250;VLG11_000948;VLG8_000830;VLG3_000037;VLG11_000207;VLG2_000788;VLG10_001923;VLG8_001669;VLG8_002052;VLG9_000419;VLG10_000989;VLG8_001050;VLG6_001237;VLG8_002008;VLG7_001518;VLG6_001714;VLG6_001228;VLG7_000437;VLG6_001704;VLG1_001445;VLG11_001857;VLG1_000430;VLG1_001444;VLG2_000721;VLG7_000370;VLG4_000362;VLG8_000498;VLG12_001465;VLG5_001689;VLG7_0015…	1.31456
GO:0019748	secondary metabolic process	BP	171/7692	358/24793	171/358	Leaf_vs_Stem	2.61957e-11	6.99223e-09	VLG7_001180;VLG6_000470;VLG6_001948;VLG10_001616;VLG5_002141;VLG9_001495;VLG1_001211;VLG7_001183;VLG6_000588;VLG1_001890;VLG3_001110;VLG5_001231;VLG5_001706;VLG7_000188;VLG12_000438;VLG6_000473;VLG3_001330;VLG8_001294;VLG1_000809;VLG3_001152;VLG3_001150;VLG3_001424;VLG3_000652;VLG11_001601;VLG5_002140;VLG6_001337;VLG3_000653;VLG8_000690;VLG6_001714;VLG6_001892;VLG3_001147;VLG6_001704;VLG1_001445;…	1.55537
GO:0055114	obsolete oxidation-reduction process	BP	389/7692	949/24793	389/949	Leaf_vs_Stem	2.60884e-11	6.99223e-09	VLG1_000515;VLG7_000862;VLG6_001378;VLG6_001948;VLG3_000709;VLG9_000378;VLG10_001923;VLG6_000588;VLG8_002052;VLG3_001110;VLG1_001535;VLG1_000809;VLG8_001050;VLG6_001237;VLG3_001150;VLG10_000530;VLG10_000067;VLG5_002140;VLG9_001157;VLG7_001576;VLG10_000129;VLG6_001591;VLG1_002168;VLG6_001714;VLG7_000437;VLG6_001704;VLG1_001445;VLG6_000548;VLG6_001520;VLG4_000490;VLG1_001444;VLG10_000877;VLG3_00114…	1.34762
GO:0050896	response to stimulus	BP	1620/7692	4627/24793	1620/4627	Leaf_vs_Stem	1.99261e-12	6.5851e-10	VLG10_000459;VLG6_000914;VLG1_000515;VLG1_001209;VLG5_000666;VLG11_000948;VLG8_001597;VLG2_000788;VLG11_001242;VLG5_001526;VLG6_000708;VLG1_000202;VLG2_000071;VLG8_000912;VLG1_001535;VLG5_000445;VLG8_001872;VLG7_001518;VLG3_000653;VLG5_000598;VLG1_000071;VLG11_001857;VLG6_000903;VLG10_000877;VLG12_000361;VLG10_001241;VLG4_000362;VLG5_001689;VLG4_001117;VLG1_001351;VLG5_000638;VLG1_002064;VLG7_001…	1.20735
GO:0019684	photosynthesis, light reaction	BP	61/7692	80/24793	61/80	Leaf_vs_Stem	1.30076e-16	5.64206e-14	VLG10_000459;VLG11_000738;VLG19_000005;VLG8_000169;VLG8_001048;VLG12_001545;VLG12_002181;VLG7_000020;VLG4_001519;VLG5_001725;VLG10_001815;VLG3_000709;VLG4_001041;VLG6_000711;VLG3_000984;VLG5_000588;VLG1_000297;VLG10_000618;VLG1_001942;VLG10_000406;VLG7_000936;VLG5_001092;VLG8_000196;VLG2_000498;VLG3_001028;VLG8_000188;VLG8_001717;VLG8_002114;VLG10_001916;VLG11_001420;VLG3_000006;VLG11_001727;VLG1…	2.46796
GO:0015979	photosynthesis	BP	76/7692	103/24793	76/103	Leaf_vs_Stem	6.49356e-19	3.00435e-16	VLG10_000459;VLG11_000738;VLG19_000005;VLG8_000169;VLG8_001048;VLG12_001545;VLG12_002181;VLG7_000020;VLG4_001519;VLG5_001725;VLG10_001815;VLG3_000709;VLG11_001469;VLG4_001041;VLG6_000711;VLG19_000010;VLG3_000984;VLG2_002085;VLG10_000505;VLG5_000588;VLG1_000297;VLG10_000618;VLG1_001942;VLG10_000406;VLG7_000936;VLG5_001092;VLG8_000196;VLG2_000498;VLG3_001028;VLG8_000188;VLG8_001717;VLG8_001322;VLG8…	2.39266
GO:0031984	organelle subcompartment	CC	311/7692	858/24793	311/858	Leaf_vs_Stem	0.000679955	0.0304445	VLG10_000459;VLG3_000709;VLG9_000378;VLG11_000377;VLG7_001375;VLG5_001289;VLG5_001364;VLG1_000537;VLG8_000912;VLG8_001717;VLG10_000011;VLG10_000067;VLG1_001650;VLG1_002168;VLG5_001928;VLG6_001843;VLG4_000490;VLG12_001299;VLG3_000840;VLG12_000385;VLG2_002235;VLG8_002107;VLG8_000692;VLG5_002237;VLG4_001519;VLG6_000711;VLG5_001584;VLG19_000010;VLG1_001297;VLG12_001251;VLG1_001338;VLG11_001874;VLG12_…	1.17515
GO:0005576	extracellular region	CC	177/7692	460/24793	177/460	Leaf_vs_Stem	0.000471804	0.0224268	VLG6_001241;VLG7_001180;VLG7_000862;VLG9_000791;VLG8_001250;VLG1_000975;VLG11_000433;VLG4_000449;VLG1_000429;VLG11_001469;VLG1_000725;VLG11_000437;VLG10_001923;VLG8_001669;VLG1_001172;VLG4_000025;VLG7_001183;VLG5_001196;VLG12_002182;VLG1_001431;VLG6_001689;VLG12_001428;VLG6_000164;VLG1_001946;VLG11_001215;VLG6_001770;VLG5_000407;VLG8_002008;VLG7_000591;VLG5_000209;VLG6_001892;VLG3_001566;VLG7_000…	1.24462
GO:0009543	chloroplast thylakoid lumen	CC	14/7692	19/24793	14/19	Leaf_vs_Stem	0.000174707	0.0101869	VLG5_001586;VLG12_002181;VLG3_000833;VLG10_000640;VLG1_001804;VLG8_002114;VLG11_000413;VLG10_001618;VLG5_001584;VLG5_001587;VLG4_001198;VLG12_000704;VLG10_001753;VLG5_001583	2.3846
GO:0031978	plastid thylakoid lumen	CC	14/7692	19/24793	14/19	Leaf_vs_Stem	0.000174707	0.0101869	VLG5_001586;VLG12_002181;VLG3_000833;VLG10_000640;VLG1_001804;VLG8_002114;VLG11_000413;VLG10_001618;VLG5_001584;VLG5_001587;VLG4_001198;VLG12_000704;VLG10_001753;VLG5_001583	2.3846
GO:0009505	plant-type cell wall	CC	127/7692	309/24793	127/309	Leaf_vs_Stem	0.000133754	0.00836263	VLG8_001250;VLG9_000312;VLG6_000940;VLG10_001923;VLG10_000802;VLG8_001669;VLG1_001172;VLG6_000588;VLG4_000889;VLG2_000071;VLG7_000790;VLG10_000989;VLG10_000170;VLG8_001693;VLG5_000407;VLG12_000337;VLG7_000591;VLG1_002327;VLG6_001591;VLG7_001665;VLG2_002296;VLG2_000669;VLG2_000133;VLG12_001704;VLG11_001854;VLG6_001130;VLG11_000185;VLG2_000159;VLG1_001951;VLG2_001164;VLG2_002158;VLG11_000671;VLG10_…	1.32905
GO:0031225	obsolete anchored component of membrane	CC	63/7692	132/24793	63/132	Leaf_vs_Stem	5.08131e-05	0.00361386	VLG7_000266;VLG5_002230;VLG11_000671;VLG11_000214;VLG8_000260;VLG6_001023;VLG2_001029;VLG1_000644;VLG3_000921;VLG2_001836;VLG5_001039;VLG11_001849;VLG12_002352;VLG2_000256;VLG12_001710;VLG7_001595;VLG2_000954;VLG1_000202;VLG8_002351;VLG11_000880;VLG12_000980;VLG10_000189;VLG10_001660;VLG1_000768;VLG10_000989;VLG9_000259;VLG7_001895;VLG9_000983;VLG2_000746;VLG8_001366;VLG10_000483;VLG12_002355;VLG…	1.54243
GO:0046658	obsolete anchored component of plasma membrane	CC	52/7692	103/24793	52/103	Leaf_vs_Stem	3.45453e-05	0.00263455	VLG7_000266;VLG5_002230;VLG11_000671;VLG11_000214;VLG8_000260;VLG6_001023;VLG1_000644;VLG3_000921;VLG2_001836;VLG5_001039;VLG11_001849;VLG12_001710;VLG2_000954;VLG7_001595;VLG11_000880;VLG1_000202;VLG12_000980;VLG10_000189;VLG1_000768;VLG10_000989;VLG9_000259;VLG7_001895;VLG9_000983;VLG2_000746;VLG8_001366;VLG10_000483;VLG2_000955;VLG12_000078;VLG7_000268;VLG10_000993;VLG6_001587;VLG12_002361;VLG…	1.6317
GO:0044459	obsolete plasma membrane part	CC	171/7692	420/24793	171/420	Leaf_vs_Stem	1.89597e-05	0.00164475	VLG6_000914;VLG1_000246;VLG3_000749;VLG4_000956;VLG11_000337;VLG1_002154;VLG7_001595;VLG1_000202;VLG1_001854;VLG3_000318;VLG6_000645;VLG10_000989;VLG9_001737;VLG11_000780;VLG2_000938;VLG9_000231;VLG2_000716;VLG7_000268;VLG8_002159;VLG2_000852;VLG12_001247;VLG8_000509;VLG10_000155;VLG8_000511;VLG3_000089;VLG10_001255;VLG8_000498;VLG11_000185;VLG6_001680;VLG3_000587;VLG5_002230;VLG11_000671;VLG1_00…	1.31921
GO:0010319	stromule	CC	20/7692	28/24793	20/28	Leaf_vs_Stem	1.43368e-05	0.00130917	VLG8_002200;VLG7_001278;VLG6_000291;VLG1_001211;VLG3_001451;VLG5_002179;VLG1_001942;VLG2_001370;VLG12_002182;VLG3_000006;VLG5_002183;VLG7_000437;VLG8_000528;VLG1_000147;VLG10_001376;VLG8_001064;VLG4_001560;VLG4_001319;VLG10_001834;VLG22_000002	2.30861
GO:0048046	apoplast	CC	115/7692	253/24793	115/253	Leaf_vs_Stem	1.19148e-06	0.000147658	VLG6_001241;VLG7_000862;VLG7_001180;VLG1_000975;VLG8_001250;VLG1_000429;VLG11_001469;VLG10_001923;VLG7_001183;VLG5_001196;VLG12_002182;VLG6_000164;VLG5_000407;VLG6_001770;VLG7_000591;VLG6_001892;VLG3_001566;VLG7_000437;VLG8_000528;VLG1_000430;VLG7_000043;VLG6_000735;VLG10_001834;VLG11_000185;VLG11_001245;VLG7_001907;VLG6_001240;VLG2_000683;VLG1_001351;VLG4_001471;VLG11_000671;VLG7_001176;VLG6_000…	1.47202
GO:0031226	obsolete intrinsic component of plasma membrane	CC	144/7692	318/24793	144/318	Leaf_vs_Stem	7.42134e-08	1.14454e-05	VLG6_000914;VLG1_000246;VLG3_000749;VLG11_000337;VLG1_002154;VLG7_001595;VLG1_000202;VLG6_000645;VLG10_000989;VLG9_001737;VLG2_000938;VLG9_000231;VLG2_000716;VLG7_000268;VLG8_002159;VLG8_000509;VLG10_000155;VLG8_000511;VLG8_000498;VLG11_000185;VLG6_001680;VLG3_000587;VLG5_002230;VLG11_000671;VLG1_000723;VLG8_000260;VLG6_001023;VLG12_000768;VLG9_000594;VLG9_000924;VLG12_001442;VLG1_000644;VLG3_000…	1.46927
GO:0005886	plasma membrane	CC	916/7692	2518/24793	916/2518	Leaf_vs_Stem	4.08485e-10	9.14479e-08	VLG6_000914;VLG7_001180;VLG5_001644;VLG4_000774;VLG12_000814;VLG5_000666;VLG10_001453;VLG3_000037;VLG12_000270;VLG1_002154;VLG11_000207;VLG2_000788;VLG3_000726;VLG7_001790;VLG11_001168;VLG1_000202;VLG2_000071;VLG5_001462;VLG5_000660;VLG5_001867;VLG5_000677;VLG6_000299;VLG10_000989;VLG6_000610;VLG1_001112;VLG5_000445;VLG5_000676;VLG9_000419;VLG8_001050;VLG2_000938;VLG5_000514;VLG4_000607;VLG11_001…	1.21547
GO:0071944	cell periphery	CC	1060/7692	2949/24793	1060/2949	Leaf_vs_Stem	2.28811e-10	5.67123e-08	VLG6_000914;VLG7_001180;VLG5_001644;VLG8_001250;VLG4_000774;VLG12_000814;VLG5_000666;VLG10_001453;VLG3_000037;VLG12_000270;VLG1_002154;VLG11_000207;VLG2_000788;VLG10_001923;VLG3_000726;VLG10_000802;VLG8_001669;VLG6_000588;VLG7_001790;VLG11_001168;VLG1_000202;VLG2_000071;VLG5_001462;VLG5_000660;VLG5_001867;VLG5_000677;VLG9_000130;VLG6_000299;VLG10_000989;VLG6_000610;VLG1_001112;VLG5_000445;VLG5_00…	1.20731
GO:0031977	thylakoid lumen	CC	44/7692	58/24793	44/58	Leaf_vs_Stem	3.23853e-12	1.02161e-09	VLG8_000169;VLG12_001545;VLG12_002181;VLG1_001851;VLG5_001233;VLG12_001600;VLG5_001747;VLG5_000321;VLG1_001253;VLG6_000229;VLG11_000377;VLG5_001584;VLG8_002038;VLG6_001122;VLG1_000297;VLG5_002179;VLG9_001400;VLG5_001586;VLG1_001338;VLG8_000210;VLG3_000833;VLG1_001245;VLG8_002114;VLG8_002037;VLG11_000413;VLG7_000292;VLG5_002183;VLG1_001222;VLG1_000045;VLG10_001832;VLG11_001572;VLG1_001804;VLG6_001…	2.45078
GO:0010287	plastoglobule	CC	43/7692	55/24793	43/55	Leaf_vs_Stem	9.30566e-13	3.22906e-10	VLG2_000683;VLG10_000459;VLG19_000005;VLG10_000349;VLG2_002208;VLG12_001513;VLG5_000967;VLG5_002237;VLG4_001519;VLG1_001955;VLG6_000711;VLG3_000421;VLG5_000588;VLG1_001837;VLG5_002179;VLG1_001942;VLG2_002221;VLG2_000498;VLG10_000406;VLG2_001370;VLG8_000196;VLG12_002182;VLG12_001396;VLG4_000660;VLG8_001717;VLG1_001271;VLG5_002183;VLG11_001727;VLG11_001420;VLG3_000406;VLG3_000683;VLG1_000661;VLG2_0…	2.52516
GO:0016020	membrane	CC	1498/7692	4191/24793	1498/4191	Leaf_vs_Stem	9.23207e-15	3.37213e-12	VLG10_000459;VLG7_000173;VLG6_000914;VLG5_001644;VLG4_000774;VLG5_000666;VLG11_000948;VLG11_000377;VLG2_000788;VLG12_000016;VLG1_000202;VLG2_000071;VLG8_000912;VLG6_000610;VLG5_000445;VLG2_000938;VLG11_001442;VLG5_002140;VLG3_000653;VLG1_002168;VLG1_000071;VLG9_000488;VLG4_000490;VLG10_000689;VLG10_001060;VLG4_000362;VLG8_000692;VLG5_001689;VLG5_000638;VLG7_001176;VLG11_001849;VLG6_000666;VLG1_00…	1.2349
GO:0009526	plastid envelope	CC	235/7692	484/24793	235/484	Leaf_vs_Stem	4.11261e-16	1.58564e-13	VLG10_000459;VLG12_001408;VLG4_000655;VLG8_002200;VLG1_000975;VLG7_001278;VLG7_001633;VLG11_000948;VLG12_001073;VLG8_002184;VLG11_001469;VLG6_001048;VLG9_001633;VLG1_001211;VLG4_000416;VLG5_001887;VLG12_002049;VLG2_000754;VLG5_001196;VLG12_002182;VLG11_000152;VLG8_001717;VLG1_000809;VLG11_000780;VLG10_000530;VLG7_001546;VLG5_002183;VLG10_000011;VLG1_001222;VLG7_000127;VLG10_000129;VLG10_000542;VL…	1.59133
GO:0009941	chloroplast envelope	CC	226/7692	461/24793	226/461	Leaf_vs_Stem	3.9356e-16	1.58564e-13	VLG10_000459;VLG12_001408;VLG4_000655;VLG8_002200;VLG1_000975;VLG7_001278;VLG7_001633;VLG11_000948;VLG12_001073;VLG8_002184;VLG11_001469;VLG6_001048;VLG9_001633;VLG1_001211;VLG4_000416;VLG5_001887;VLG12_002049;VLG2_000754;VLG5_001196;VLG12_002182;VLG11_000152;VLG8_001717;VLG1_000809;VLG11_000780;VLG10_000530;VLG7_001546;VLG10_000011;VLG1_001222;VLG7_000127;VLG10_000129;VLG10_000542;VLG10_000999;V…	1.60593
GO:0009532	plastid stroma	CC	290/7692	568/24793	290/568	Leaf_vs_Stem	7.39732e-24	3.80364e-21	VLG10_000459;VLG11_000738;VLG19_000005;VLG7_000862;VLG7_001180;VLG12_001408;VLG12_001687;VLG1_000975;VLG8_002200;VLG3_001044;VLG7_001278;VLG7_001624;VLG12_001073;VLG8_002184;VLG9_000378;VLG11_001469;VLG12_000413;VLG4_000843;VLG3_000421;VLG1_001211;VLG4_000416;VLG1_000297;VLG7_001183;VLG4_000725;VLG7_000496;VLG5_001196;VLG12_002182;VLG11_000152;VLG4_000660;VLG8_001717;VLG4_000336;VLG3_000903;VLG7_…	1.68664
GO:0009536	plastid	CC	725/7692	1734/24793	725/1734	Leaf_vs_Stem	7.67306e-24	3.80364e-21	VLG10_000459;VLG11_000738;VLG1_000515;VLG7_000862;VLG7_001180;VLG12_001687;VLG24_000009;VLG11_000948;VLG12_001600;VLG3_000709;VLG11_000377;VLG9_000378;VLG8_000610;VLG11_000569;VLG10_001072;VLG2_000932;VLG5_001364;VLG4_000725;VLG8_000912;VLG10_001848;VLG8_001717;VLG1_000809;VLG8_001872;VLG10_000530;VLG10_000011;VLG7_001576;VLG10_000129;VLG1_002168;VLG6_001228;VLG7_000437;VLG19_000004;VLG7_000395;V…	1.41648
GO:0009570	chloroplast stroma	CC	287/7692	559/24793	287/559	Leaf_vs_Stem	4.20411e-24	2.43138e-21	VLG10_000459;VLG11_000738;VLG19_000005;VLG7_000862;VLG7_001180;VLG12_001408;VLG12_001687;VLG1_000975;VLG8_002200;VLG3_001044;VLG7_001278;VLG7_001624;VLG12_001073;VLG8_002184;VLG9_000378;VLG11_001469;VLG12_000413;VLG4_000843;VLG3_000421;VLG1_001211;VLG4_000416;VLG1_000297;VLG7_001183;VLG4_000725;VLG7_000496;VLG5_001196;VLG12_002182;VLG11_000152;VLG4_000660;VLG8_001717;VLG4_000336;VLG3_000903;VLG7_…	1.69595
GO:0009507	chloroplast	CC	716/7692	1673/24793	716/1673	Leaf_vs_Stem	5.57772e-27	3.51904e-24	VLG10_000459;VLG11_000738;VLG1_000515;VLG7_000862;VLG7_001180;VLG12_001687;VLG24_000009;VLG11_000948;VLG12_001600;VLG3_000709;VLG11_000377;VLG9_000378;VLG8_000610;VLG11_000569;VLG10_001072;VLG2_000932;VLG5_001364;VLG4_000725;VLG8_000912;VLG10_001848;VLG8_001717;VLG1_000809;VLG8_001872;VLG10_000530;VLG10_000011;VLG7_001576;VLG10_000129;VLG1_002168;VLG6_001228;VLG7_000437;VLG19_000004;VLG7_000395;V…	1.45404
GO:0009535	chloroplast thylakoid membrane	CC	159/7692	236/24793	159/236	Leaf_vs_Stem	1.3e-30	9.02203e-28	VLG10_000459;VLG19_000005;VLG8_001048;VLG12_001545;VLG9_000591;VLG7_001278;VLG4_000956;VLG3_000709;VLG9_000378;VLG11_000377;VLG8_001527;VLG12_000413;VLG3_000421;VLG1_000297;VLG2_000754;VLG5_001364;VLG8_000210;VLG11_001177;VLG8_000912;VLG8_001717;VLG11_000780;VLG5_002183;VLG10_000011;VLG1_001492;VLG1_001222;VLG7_000127;VLG2_000752;VLG1_002168;VLG24_000014;VLG2_000923;VLG8_000306;VLG19_000006;VLG7_…	2.20782
GO:0055035	plastid thylakoid membrane	CC	161/7692	240/24793	161/240	Leaf_vs_Stem	1.19685e-30	9.02203e-28	VLG10_000459;VLG19_000005;VLG8_001048;VLG12_001545;VLG9_000591;VLG7_001278;VLG4_000956;VLG3_000709;VLG9_000378;VLG11_000377;VLG8_001527;VLG12_000413;VLG3_000421;VLG1_000297;VLG2_000754;VLG5_001364;VLG8_000210;VLG11_001177;VLG8_000912;VLG8_001717;VLG11_000780;VLG5_002183;VLG10_000011;VLG1_001492;VLG1_001222;VLG7_000127;VLG2_000752;VLG1_002168;VLG24_000014;VLG2_000923;VLG8_000306;VLG19_000006;VLG7_…	2.19879
GO:0034357	photosynthetic membrane	CC	167/7692	252/24793	167/252	Leaf_vs_Stem	8.87117e-31	7.69574e-28	VLG10_000459;VLG19_000005;VLG8_001048;VLG12_001545;VLG9_000591;VLG7_001278;VLG4_000956;VLG3_000709;VLG9_000378;VLG11_000377;VLG8_001527;VLG12_000413;VLG3_000421;VLG1_000297;VLG2_000754;VLG5_001364;VLG8_000210;VLG11_001177;VLG8_000912;VLG8_001717;VLG11_000780;VLG5_002183;VLG8_000121;VLG10_000011;VLG1_001492;VLG1_001222;VLG7_000127;VLG2_000752;VLG1_002168;VLG24_000014;VLG2_000923;VLG8_000306;VLG19_…	2.17347
GO:0042651	thylakoid membrane	CC	167/7692	252/24793	167/252	Leaf_vs_Stem	8.87117e-31	7.69574e-28	VLG10_000459;VLG19_000005;VLG8_001048;VLG12_001545;VLG9_000591;VLG7_001278;VLG4_000956;VLG3_000709;VLG9_000378;VLG11_000377;VLG8_001527;VLG12_000413;VLG3_000421;VLG1_000297;VLG2_000754;VLG5_001364;VLG8_000210;VLG11_001177;VLG8_000912;VLG8_001717;VLG11_000780;VLG5_002183;VLG8_000121;VLG10_000011;VLG1_001492;VLG1_001222;VLG7_000127;VLG2_000752;VLG1_002168;VLG24_000014;VLG2_000923;VLG8_000306;VLG19_…	2.17347
GO:0044435	obsolete plastid part	CC	484/7692	996/24793	484/996	Leaf_vs_Stem	6.91339e-33	7.99649e-30	VLG10_000459;VLG11_000738;VLG7_000862;VLG7_001180;VLG12_001687;VLG11_000948;VLG3_000709;VLG9_000378;VLG11_000377;VLG5_001364;VLG4_000725;VLG8_000912;VLG8_001717;VLG1_000809;VLG10_000530;VLG10_000011;VLG10_000129;VLG1_002168;VLG6_001228;VLG7_000437;VLG7_000395;VLG5_001928;VLG5_001505;VLG9_000488;VLG4_000490;VLG12_001299;VLG8_000151;VLG7_000530;VLG12_000385;VLG2_002235;VLG1_001563;VLG1_001340;VLG5_…	1.63529
GO:0044434	obsolete chloroplast part	CC	479/7692	977/24793	479/977	Leaf_vs_Stem	9.72182e-34	1.34939e-30	VLG10_000459;VLG11_000738;VLG7_000862;VLG7_001180;VLG12_001687;VLG11_000948;VLG3_000709;VLG9_000378;VLG11_000377;VLG5_001364;VLG4_000725;VLG8_000912;VLG8_001717;VLG1_000809;VLG10_000530;VLG10_000011;VLG10_000129;VLG1_002168;VLG6_001228;VLG7_000437;VLG7_000395;VLG5_001928;VLG5_001505;VLG9_000488;VLG4_000490;VLG12_001299;VLG8_000151;VLG7_000530;VLG12_000385;VLG2_002235;VLG1_001563;VLG1_001340;VLG5_…	1.65019
GO:0009534	chloroplast thylakoid	CC	207/7692	322/24793	207/322	Leaf_vs_Stem	4.95936e-35	8.60449e-32	VLG10_000459;VLG19_000005;VLG11_000676;VLG8_001048;VLG1_000975;VLG9_000591;VLG12_001545;VLG7_001278;VLG4_000956;VLG3_000709;VLG9_000378;VLG11_000377;VLG9_001633;VLG8_001527;VLG12_000413;VLG3_000421;VLG1_000297;VLG12_002049;VLG5_001586;VLG5_001364;VLG2_000754;VLG11_001177;VLG3_000833;VLG8_000210;VLG8_000912;VLG8_001717;VLG11_000780;VLG5_002183;VLG10_000011;VLG1_001492;VLG1_001222;VLG7_000127;VLG2_…	2.11881
GO:0031976	plastid thylakoid	CC	208/7692	324/24793	208/324	Leaf_vs_Stem	4.55397e-35	8.60449e-32	VLG10_000459;VLG19_000005;VLG11_000676;VLG8_001048;VLG1_000975;VLG9_000591;VLG12_001545;VLG7_001278;VLG4_000956;VLG3_000709;VLG9_000378;VLG11_000377;VLG9_001633;VLG8_001527;VLG12_000413;VLG3_000421;VLG1_000297;VLG12_002049;VLG5_001586;VLG5_001364;VLG2_000754;VLG11_001177;VLG3_000833;VLG8_000210;VLG8_000912;VLG8_001717;VLG11_000780;VLG5_002183;VLG10_000011;VLG1_001492;VLG1_001222;VLG7_000127;VLG2_…	2.11612
GO:0044436	obsolete thylakoid part	CC	187/7692	280/24793	187/280	Leaf_vs_Stem	4.80646e-35	8.60449e-32	VLG10_000459;VLG19_000005;VLG8_001048;VLG12_001545;VLG9_000591;VLG7_001278;VLG4_000956;VLG12_001600;VLG3_000709;VLG9_000378;VLG11_000377;VLG8_001527;VLG12_000413;VLG3_000421;VLG1_000297;VLG2_000754;VLG5_001586;VLG5_001364;VLG8_000210;VLG3_000833;VLG11_001177;VLG8_000912;VLG8_001717;VLG8_002037;VLG11_000780;VLG7_000292;VLG5_002183;VLG8_000121;VLG10_000011;VLG1_001492;VLG1_001222;VLG7_000127;VLG2_0…	2.19693
GO:0009579	thylakoid	CC	257/7692	390/24793	257/390	Leaf_vs_Stem	2.58156e-46	1.79161e-42	VLG10_000459;VLG19_000005;VLG11_000676;VLG8_001048;VLG1_000975;VLG9_000591;VLG8_002200;VLG12_001545;VLG7_001278;VLG4_000956;VLG12_001600;VLG3_000709;VLG11_000377;VLG9_000378;VLG11_001469;VLG9_001633;VLG8_001527;VLG12_000413;VLG3_000421;VLG1_001211;VLG1_000297;VLG12_002049;VLG5_001289;VLG5_001364;VLG5_001586;VLG2_000754;VLG4_000725;VLG11_001177;VLG3_000833;VLG8_000210;VLG8_000912;VLG8_001717;VLG8_…	2.18913
GO:0001076	obsolete transcription factor activity, RNA polymerase II transcription factor binding	MF	42/7692	89/24793	42/89	Leaf_vs_Stem	0.00114222	0.0447854	VLG5_001988;VLG5_000717;VLG10_001378;VLG10_000616;VLG8_001461;VLG11_001084;VLG3_000941;VLG1_001497;VLG12_002205;VLG8_001139;VLG10_000019;VLG4_001236;VLG9_001323;VLG10_000617;VLG1_000051;VLG1_000596;VLG11_000753;VLG10_000992;VLG1_000929;VLG1_002193;VLG4_001320;VLG5_001624;VLG7_000109;VLG10_000288;VLG8_001782;VLG6_001918;VLG1_001007;VLG7_001704;VLG10_000213;VLG8_001624;VLG6_000330;VLG4_000924;VLG6_…	1.52527
GO:0001871	obsolete pattern binding	MF	26/7692	48/24793	26/48	Leaf_vs_Stem	0.000800923	0.0340083	VLG6_001023;VLG1_000644;VLG11_000569;VLG11_001849;VLG5_001039;VLG12_001710;VLG6_000222;VLG12_000980;VLG1_000768;VLG12_002182;VLG9_000259;VLG2_000746;VLG8_001366;VLG12_000078;VLG10_000993;VLG12_002361;VLG7_001144;VLG1_001299;VLG10_001287;VLG5_002110;VLG10_001216;VLG7_000724;VLG12_002198;VLG6_001680;VLG10_001473;VLG12_000978	1.75355
GO:0016759	cellulose synthase activity	MF	20/7692	34/24793	20/34	Leaf_vs_Stem	0.000800576	0.0340083	VLG2_000865;VLG5_002125;VLG2_000864;VLG3_000854;VLG2_000868;VLG10_001454;VLG5_002117;VLG10_001456;VLG2_000867;VLG5_000475;VLG8_000036;VLG10_001455;VLG5_002118;VLG10_001457;VLG5_002124;VLG5_002115;VLG2_000866;VLG5_002120;VLG5_002116;VLG8_001199	1.90619
GO:0030247	polysaccharide binding	MF	26/7692	48/24793	26/48	Leaf_vs_Stem	0.000800923	0.0340083	VLG6_001023;VLG1_000644;VLG11_000569;VLG11_001849;VLG5_001039;VLG12_001710;VLG6_000222;VLG12_000980;VLG1_000768;VLG12_002182;VLG9_000259;VLG2_000746;VLG8_001366;VLG12_000078;VLG10_000993;VLG12_002361;VLG7_001144;VLG1_001299;VLG10_001287;VLG5_002110;VLG10_001216;VLG7_000724;VLG12_002198;VLG6_001680;VLG10_001473;VLG12_000978	1.75355
GO:0005215	transporter activity	MF	329/7692	913/24793	329/913	Leaf_vs_Stem	0.000752083	0.0328268	VLG6_000914;VLG12_000814;VLG11_000948;VLG2_001584;VLG6_000580;VLG7_001375;VLG2_000984;VLG2_000938;VLG7_001518;VLG5_000598;VLG1_000430;VLG5_001252;VLG5_000867;VLG7_000238;VLG8_000498;VLG10_000765;VLG4_001471;VLG5_001325;VLG4_001479;VLG7_001515;VLG1_000475;VLG1_002302;VLG8_000891;VLG12_000757;VLG6_001168;VLG1_001240;VLG1_002106;VLG4_001551;VLG7_000799;VLG2_000449;VLG8_000285;VLG8_000062;VLG8_001510…	1.16855
GO:0016757	glycosyltransferase activity	MF	152/7692	391/24793	152/391	Leaf_vs_Stem	0.000690338	0.0306665	VLG2_000244;VLG12_001182;VLG11_001484;VLG7_000326;VLG5_000991;VLG4_000262;VLG6_001817;VLG2_000250;VLG4_000461;VLG6_000222;VLG9_000253;VLG10_001848;VLG8_002084;VLG7_001509;VLG1_001423;VLG5_002117;VLG4_001131;VLG10_001456;VLG2_001121;VLG10_000148;VLG2_000867;VLG11_001802;VLG7_001735;VLG12_000691;VLG9_000254;VLG6_001843;VLG6_000988;VLG3_001802;VLG5_000541;VLG11_000807;VLG6_001130;VLG9_000869;VLG5_00…	1.25655
GO:0000989	obsolete transcription factor activity, transcription factor binding	MF	44/7692	92/24793	44/92	Leaf_vs_Stem	0.000620017	0.0283087	VLG5_001988;VLG9_001742;VLG5_000717;VLG10_001378;VLG10_000616;VLG8_001461;VLG11_001084;VLG3_000941;VLG1_001497;VLG12_002205;VLG8_001139;VLG10_000019;VLG4_001236;VLG1_001146;VLG9_001323;VLG10_000617;VLG1_000051;VLG1_000596;VLG11_000753;VLG10_000992;VLG1_000929;VLG1_002193;VLG4_001320;VLG5_001624;VLG7_000109;VLG10_000288;VLG8_001782;VLG6_001918;VLG1_001007;VLG7_001704;VLG10_000213;VLG8_001624;VLG6_…	1.54568
GO:0008422	beta-glucosidase activity	MF	50/7692	107/24793	50/107	Leaf_vs_Stem	0.00054232	0.0250913	VLG5_001700;VLG5_000278;VLG7_000946;VLG5_000276;VLG6_001023;VLG2_001282;VLG2_001274;VLG12_001319;VLG2_001277;VLG12_000328;VLG5_000284;VLG5_001039;VLG11_001849;VLG3_000088;VLG5_000289;VLG12_001318;VLG2_001279;VLG4_000889;VLG12_000491;VLG5_000283;VLG5_001706;VLG2_001278;VLG4_000892;VLG12_001325;VLG5_000287;VLG12_000327;VLG12_001329;VLG12_001327;VLG5_000606;VLG5_000282;VLG2_001273;VLG2_001281;VLG8_0…	1.50986
GO:0008509	monoatomic anion transmembrane transporter activity	MF	90/7692	214/24793	90/214	Leaf_vs_Stem	0.000496348	0.0231185	VLG1_000246;VLG3_000795;VLG7_001375;VLG9_001670;VLG2_000984;VLG3_001127;VLG6_000065;VLG2_000068;VLG3_000180;VLG10_000765;VLG3_001340;VLG5_001318;VLG2_001884;VLG2_000263;VLG3_000355;VLG4_001479;VLG9_000594;VLG9_000924;VLG11_000459;VLG11_000117;VLG1_000389;VLG9_001666;VLG12_002335;VLG7_001948;VLG1_000695;VLG1_002155;VLG8_000891;VLG12_000757;VLG10_000837;VLG8_000178;VLG1_002046;VLG5_001253;VLG4_0004…	1.35845
GO:0015926	glucosidase activity	MF	54/7692	116/24793	54/116	Leaf_vs_Stem	0.000373585	0.0181307	VLG5_001700;VLG5_000278;VLG7_000946;VLG5_000276;VLG6_001023;VLG2_001282;VLG2_001274;VLG12_001319;VLG2_001277;VLG12_000328;VLG5_000284;VLG5_001039;VLG11_001849;VLG3_000088;VLG5_000289;VLG12_001318;VLG12_000173;VLG2_001279;VLG4_000889;VLG12_000491;VLG5_000283;VLG5_001706;VLG2_001278;VLG9_000932;VLG4_000892;VLG12_001325;VLG5_000287;VLG12_000327;VLG12_001329;VLG12_000268;VLG12_001327;VLG5_000606;VLG5…	1.50404
GO:0038023	signaling receptor activity	MF	118/7692	290/24793	118/290	Leaf_vs_Stem	0.000364658	0.017822	VLG6_001548;VLG6_000686;VLG4_000449;VLG2_000788;VLG2_000346;VLG4_000025;VLG9_000419;VLG8_002170;VLG2_002021;VLG4_000038;VLG12_000134;VLG12_000660;VLG10_001049;VLG6_000683;VLG8_002171;VLG8_002086;VLG4_000362;VLG2_000378;VLG10_000674;VLG5_000080;VLG2_000159;VLG8_000143;VLG2_002158;VLG2_000802;VLG7_000257;VLG4_000210;VLG5_000181;VLG1_000905;VLG2_000796;VLG2_000389;VLG2_000070;VLG3_000154;VLG11_00070…	1.31493
GO:0080043	quercetin 3-O-glucosyltransferase activity	MF	74/7692	168/24793	74/168	Leaf_vs_Stem	0.000301168	0.0149293	VLG2_000243;VLG2_000244;VLG2_001815;VLG2_000246;VLG6_001206;VLG8_001296;VLG11_001484;VLG2_000251;VLG9_000255;VLG6_001824;VLG7_001498;VLG7_000326;VLG7_001510;VLG2_000252;VLG6_001817;VLG11_000454;VLG10_001709;VLG11_000806;VLG2_000245;VLG2_000250;VLG12_000085;VLG11_000451;VLG10_000363;VLG6_000797;VLG12_000688;VLG12_001029;VLG10_001711;VLG2_000248;VLG5_001159;VLG9_000253;VLG7_001509;VLG2_000253;VLG12…	1.42293
GO:0080044	quercetin 7-O-glucosyltransferase activity	MF	74/7692	168/24793	74/168	Leaf_vs_Stem	0.000301168	0.0149293	VLG2_000243;VLG2_000244;VLG2_001815;VLG2_000246;VLG6_001206;VLG8_001296;VLG11_001484;VLG2_000251;VLG9_000255;VLG6_001824;VLG7_001498;VLG7_000326;VLG7_001510;VLG2_000252;VLG6_001817;VLG11_000454;VLG10_001709;VLG11_000806;VLG2_000245;VLG2_000250;VLG12_000085;VLG11_000451;VLG10_000363;VLG6_000797;VLG12_000688;VLG12_001029;VLG10_001711;VLG2_000248;VLG5_001159;VLG9_000253;VLG7_001509;VLG2_000253;VLG12…	1.42293
GO:0001134	obsolete transcription regulator recruiting activity	MF	41/7692	82/24793	41/82	Leaf_vs_Stem	0.000293655	0.0147679	VLG5_001988;VLG5_000717;VLG10_001378;VLG10_000616;VLG8_001461;VLG11_001084;VLG3_000941;VLG1_001497;VLG12_002205;VLG8_001139;VLG10_000019;VLG4_001236;VLG9_001323;VLG10_000617;VLG1_000051;VLG1_000596;VLG11_000753;VLG10_000992;VLG1_000929;VLG1_002193;VLG4_001320;VLG5_001624;VLG10_000288;VLG8_001782;VLG6_001918;VLG1_001007;VLG7_001704;VLG10_000213;VLG8_001624;VLG6_000330;VLG4_000924;VLG6_002043;VLG2_…	1.61625
GO:0001135	obsolete RNA polymerase II transcription regulator recruiting activity	MF	41/7692	82/24793	41/82	Leaf_vs_Stem	0.000293655	0.0147679	VLG5_001988;VLG5_000717;VLG10_001378;VLG10_000616;VLG8_001461;VLG11_001084;VLG3_000941;VLG1_001497;VLG12_002205;VLG8_001139;VLG10_000019;VLG4_001236;VLG9_001323;VLG10_000617;VLG1_000051;VLG1_000596;VLG11_000753;VLG10_000992;VLG1_000929;VLG1_002193;VLG4_001320;VLG5_001624;VLG10_000288;VLG8_001782;VLG6_001918;VLG1_001007;VLG7_001704;VLG10_000213;VLG8_001624;VLG6_000330;VLG4_000924;VLG6_002043;VLG2_…	1.61625
GO:0016798	hydrolase activity, acting on glycosyl bonds	MF	116/7692	283/24793	116/283	Leaf_vs_Stem	0.000290276	0.0147679	VLG5_000278;VLG9_000791;VLG8_001250;VLG2_001282;VLG9_000312;VLG4_000889;VLG5_001706;VLG12_001325;VLG5_000287;VLG1_000689;VLG12_000337;VLG8_002008;VLG5_002030;VLG2_000669;VLG12_002144;VLG12_001322;VLG12_000011;VLG5_001711;VLG7_001835;VLG5_001454;VLG6_001680;VLG12_000163;VLG5_000276;VLG6_001023;VLG2_001274;VLG1_000644;VLG5_000284;VLG11_001849;VLG10_000126;VLG2_001278;VLG9_000932;VLG4_000892;VLG2_00…	1.32472
GO:0035251	UDP-glucosyltransferase activity	MF	90/7692	211/24793	90/211	Leaf_vs_Stem	0.00028176	0.0147023	VLG2_000244;VLG11_001484;VLG7_000326;VLG6_001817;VLG2_000250;VLG4_000461;VLG9_000253;VLG7_001509;VLG1_001423;VLG4_001131;VLG10_000148;VLG11_001802;VLG12_000691;VLG9_000254;VLG6_000988;VLG5_000541;VLG11_000807;VLG12_001932;VLG8_001296;VLG11_000368;VLG7_001498;VLG11_000369;VLG11_000806;VLG12_000085;VLG11_000451;VLG6_000797;VLG12_000688;VLG2_000248;VLG2_000253;VLG9_000250;VLG2_000240;VLG10_000819;VL…	1.37806
GO:0004675	transmembrane receptor protein serine/threonine kinase activity	MF	85/7692	197/24793	85/197	Leaf_vs_Stem	0.000260855	0.0137146	VLG6_001548;VLG4_000449;VLG2_000788;VLG9_000419;VLG8_002170;VLG4_000038;VLG12_000660;VLG10_001049;VLG8_002171;VLG4_000362;VLG2_000378;VLG10_000674;VLG5_000080;VLG2_000159;VLG8_000143;VLG2_000802;VLG2_002158;VLG7_000257;VLG4_000210;VLG2_000796;VLG2_000389;VLG2_000070;VLG3_000154;VLG11_000706;VLG2_000171;VLG7_001895;VLG2_001013;VLG3_001606;VLG12_000024;VLG6_001248;VLG2_001545;VLG2_001710;VLG8_00018…	1.39397
GO:0060089	molecular transducer activity	MF	127/7692	313/24793	127/313	Leaf_vs_Stem	0.000255551	0.0135384	VLG6_001548;VLG6_000686;VLG4_000449;VLG2_000788;VLG2_000346;VLG4_000025;VLG9_000419;VLG8_002170;VLG1_002173;VLG2_002021;VLG4_000038;VLG12_000134;VLG12_000660;VLG10_001049;VLG6_000683;VLG11_001886;VLG8_002171;VLG4_000362;VLG8_002086;VLG2_000378;VLG10_000674;VLG2_000159;VLG5_000080;VLG8_000320;VLG8_000143;VLG2_002158;VLG2_000802;VLG7_000257;VLG4_000210;VLG5_000181;VLG1_000905;VLG2_000796;VLG2_00038…	1.31166
GO:0048037	obsolete cofactor binding	MF	87/7692	202/24793	87/202	Leaf_vs_Stem	0.000239198	0.0127695	VLG5_001917;VLG10_000459;VLG7_001180;VLG1_001232;VLG7_001633;VLG10_001923;VLG5_000132;VLG1_001211;VLG1_000153;VLG7_001183;VLG12_002049;VLG7_000496;VLG10_001142;VLG5_001196;VLG11_001177;VLG12_000438;VLG8_001717;VLG6_001689;VLG4_000327;VLG2_002346;VLG11_001730;VLG1_001040;VLG3_001169;VLG9_000730;VLG12_000660;VLG3_001504;VLG10_000411;VLG1_001230;VLG6_001980;VLG7_000082;VLG6_000003;VLG4_001519;VLG7_0…	1.39152
GO:0046906	tetrapyrrole binding	MF	21/7692	34/24793	21/34	Leaf_vs_Stem	0.000231358	0.0124467	VLG10_000459;VLG1_001232;VLG4_001519;VLG6_000711;VLG10_001923;VLG5_000588;VLG2_000498;VLG10_000406;VLG8_000804;VLG8_000196;VLG11_001177;VLG9_001758;VLG8_001717;VLG11_001420;VLG8_002124;VLG11_001727;VLG2_002118;VLG10_000411;VLG1_001230;VLG6_001003;VLG5_001725	1.99969
GO:0000988	obsolete transcription factor activity, protein binding	MF	50/7692	103/24793	50/103	Leaf_vs_Stem	0.00017301	0.0101869	VLG5_001988;VLG9_001742;VLG11_000947;VLG5_000717;VLG10_001378;VLG10_000616;VLG8_001461;VLG11_001084;VLG3_000941;VLG1_001497;VLG1_001136;VLG12_002205;VLG8_001139;VLG10_000019;VLG1_001146;VLG4_001236;VLG9_001323;VLG10_000617;VLG1_000051;VLG1_000596;VLG11_000753;VLG8_001872;VLG10_000992;VLG1_000929;VLG1_002193;VLG4_001320;VLG5_001624;VLG7_000109;VLG10_000288;VLG8_001782;VLG6_001918;VLG1_001007;VLG7_…	1.56872
GO:0004888	transmembrane signaling receptor activity	MF	107/7692	255/24793	107/255	Leaf_vs_Stem	0.000171806	0.0101869	VLG6_001548;VLG6_000686;VLG4_000449;VLG2_000788;VLG4_000025;VLG9_000419;VLG8_002170;VLG4_000038;VLG12_000660;VLG10_001049;VLG6_000683;VLG8_002171;VLG8_002086;VLG4_000362;VLG2_000378;VLG10_000674;VLG5_000080;VLG2_000159;VLG8_000143;VLG2_002158;VLG2_000802;VLG7_000257;VLG4_000210;VLG5_000181;VLG1_000905;VLG2_000796;VLG2_000389;VLG2_000070;VLG3_000154;VLG11_000706;VLG2_000171;VLG7_001895;VLG1_001240…	1.35623
GO:0015562	efflux transmembrane transporter activity	MF	19/7692	29/24793	19/29	Leaf_vs_Stem	0.000149661	0.00917884	VLG8_000807;VLG7_001707;VLG4_000816;VLG1_002155;VLG1_002274;VLG4_000817;VLG7_001852;VLG10_001758;VLG4_000818;VLG5_001007;VLG12_001247;VLG7_000031;VLG4_000813;VLG4_000815;VLG1_002156;VLG2_001150;VLG4_000510;VLG4_000814;VLG12_000953	2.12083
GO:0016758	hexosyltransferase activity	MF	144/7692	355/24793	144/355	Leaf_vs_Stem	0.000103858	0.00673622	VLG2_000244;VLG12_001182;VLG11_001484;VLG7_000326;VLG4_000262;VLG6_001817;VLG2_000250;VLG4_000461;VLG6_000222;VLG9_000253;VLG10_001848;VLG7_001509;VLG1_001423;VLG5_002117;VLG4_001131;VLG10_001456;VLG2_001121;VLG10_000148;VLG2_000867;VLG11_001802;VLG7_001735;VLG12_000691;VLG9_000254;VLG6_001843;VLG6_000988;VLG3_001802;VLG5_000541;VLG11_000807;VLG6_001130;VLG9_000869;VLG5_002124;VLG12_001932;VLG8_0…	1.31232
GO:0019199	transmembrane receptor protein kinase activity	MF	91/7692	206/24793	91/206	Leaf_vs_Stem	5.73159e-05	0.0040179	VLG6_001548;VLG4_000449;VLG2_000788;VLG4_000025;VLG9_000419;VLG8_002170;VLG4_000038;VLG12_000660;VLG10_001049;VLG8_002171;VLG8_002086;VLG4_000362;VLG2_000378;VLG10_000674;VLG5_000080;VLG2_000159;VLG8_000143;VLG2_000802;VLG2_002158;VLG7_000257;VLG4_000210;VLG2_000796;VLG2_000389;VLG2_000070;VLG3_000154;VLG11_000706;VLG2_000171;VLG7_001895;VLG2_001013;VLG3_001606;VLG12_000024;VLG6_001248;VLG2_00154…	1.42799
GO:0004553	hydrolase activity, hydrolyzing O-glycosyl compounds	MF	114/7692	264/24793	114/264	Leaf_vs_Stem	2.46402e-05	0.0020118	VLG5_000278;VLG9_000791;VLG8_001250;VLG2_001282;VLG9_000312;VLG4_000889;VLG5_001706;VLG12_001325;VLG5_000287;VLG1_000689;VLG12_000337;VLG8_002008;VLG5_002030;VLG2_000669;VLG12_002144;VLG12_001322;VLG12_000011;VLG5_001711;VLG7_001835;VLG5_001454;VLG6_001680;VLG12_000163;VLG5_000276;VLG6_001023;VLG2_001274;VLG1_000644;VLG5_000284;VLG11_001849;VLG10_000126;VLG2_001278;VLG9_000932;VLG4_000892;VLG2_00…	1.39695
GO:0046527	glucosyltransferase activity	MF	114/7692	259/24793	114/259	Leaf_vs_Stem	8.66241e-06	0.000823522	VLG2_000244;VLG12_001182;VLG11_001484;VLG7_000326;VLG6_001817;VLG2_000250;VLG4_000461;VLG9_000253;VLG7_001509;VLG1_001423;VLG5_002117;VLG4_001131;VLG10_001456;VLG10_000148;VLG2_000867;VLG11_001802;VLG12_000691;VLG9_000254;VLG6_000988;VLG5_000541;VLG11_000807;VLG6_001130;VLG5_002124;VLG12_001932;VLG8_001296;VLG11_000368;VLG7_001498;VLG11_000369;VLG11_000806;VLG12_000085;VLG11_000451;VLG6_000797;VL…	1.42445
GO:0022857	transmembrane transporter activity	MF	312/7692	811/24793	312/811	Leaf_vs_Stem	3.72078e-06	0.000379739	VLG6_000914;VLG12_000814;VLG11_000948;VLG2_001584;VLG7_001375;VLG2_000984;VLG2_000938;VLG7_001518;VLG5_000598;VLG1_000430;VLG5_001252;VLG5_000867;VLG7_000238;VLG8_000498;VLG10_000765;VLG4_001471;VLG5_001325;VLG4_001479;VLG7_001515;VLG1_000475;VLG1_002302;VLG8_000891;VLG12_000757;VLG6_001168;VLG1_001240;VLG1_002106;VLG7_000799;VLG2_000449;VLG8_000285;VLG8_000062;VLG8_001510;VLG1_001539;VLG3_000483…	1.25264
GO:0016168	chlorophyll binding	MF	13/7692	14/24793	13/14	Leaf_vs_Stem	2.6541e-06	0.000287804	VLG10_000459;VLG5_000588;VLG2_000498;VLG10_000406;VLG8_000196;VLG2_002118;VLG4_001519;VLG8_001717;VLG6_000711;VLG6_001003;VLG11_001420;VLG5_001725;VLG11_001727	2.98614
GO:0016705	oxidoreductase activity, acting on paired donors, with incorporation or reduction of molecular oxygen	MF	110/7692	231/24793	110/231	Leaf_vs_Stem	1.13493e-07	1.71226e-05	VLG6_001378;VLG8_001919;VLG6_000470;VLG6_001948;VLG1_000308;VLG5_002141;VLG7_000511;VLG3_001110;VLG7_000188;VLG6_000473;VLG3_001330;VLG1_000809;VLG6_000593;VLG3_001152;VLG5_000042;VLG3_001150;VLG3_001424;VLG3_001064;VLG5_002140;VLG6_001337;VLG8_000690;VLG6_001714;VLG3_001147;VLG6_001704;VLG1_001445;VLG8_001445;VLG6_001520;VLG3_000665;VLG3_001111;VLG1_001444;VLG10_000877;VLG3_001142;VLG4_001395;VL…	1.54287
GO:0016709	oxidoreductase activity, acting on paired donors, with incorporation or reduction of molecular oxygen, NAD(P)H as one donor, and incorporation of one atom of oxygen	MF	83/7692	160/24793	83/160	Leaf_vs_Stem	3.92481e-08	6.48529e-06	VLG8_001919;VLG6_000470;VLG6_001948;VLG1_000308;VLG5_002141;VLG3_001110;VLG7_000188;VLG6_000473;VLG3_001330;VLG1_000809;VLG6_000593;VLG3_001152;VLG3_001150;VLG3_001424;VLG5_002140;VLG6_001337;VLG8_000690;VLG6_001714;VLG3_001147;VLG6_001704;VLG1_001445;VLG8_001445;VLG3_000665;VLG3_001111;VLG1_001444;VLG4_001395;VLG1_001616;VLG6_001856;VLG8_000692;VLG11_000882;VLG4_000893;VLG6_000604;VLG5_002137;VL…	1.67939
GO:0140110	transcription regulator activity	MF	395/7692	1012/24793	395/1012	Leaf_vs_Stem	2.55539e-08	4.4336e-06	VLG2_001853;VLG12_000537;VLG1_000930;VLG6_001065;VLG6_000813;VLG1_001146;VLG8_000613;VLG9_000131;VLG2_000887;VLG2_001227;VLG8_001872;VLG1_001336;VLG12_001173;VLG4_001196;VLG11_001857;VLG8_001895;VLG8_001264;VLG7_000370;VLG8_001624;VLG3_001125;VLG12_001465;VLG7_001503;VLG1_000122;VLG7_001975;VLG5_000997;VLG4_001117;VLG5_000717;VLG10_001180;VLG6_001034;VLG1_002064;VLG3_000588;VLG6_001730;VLG1_00189…	1.27837
GO:0003700	DNA-binding transcription factor activity	MF	382/7692	936/24793	382/936	Leaf_vs_Stem	7.9095e-11	2.03303e-08	VLG2_001853;VLG12_000537;VLG1_000930;VLG6_001065;VLG6_000813;VLG1_001146;VLG8_000613;VLG9_000131;VLG2_000887;VLG2_001227;VLG1_001336;VLG12_001173;VLG4_001196;VLG11_001857;VLG8_001895;VLG8_001264;VLG7_000370;VLG8_001624;VLG3_001125;VLG12_001465;VLG7_001503;VLG1_000122;VLG7_001975;VLG5_000997;VLG4_001117;VLG5_000717;VLG10_001180;VLG6_001034;VLG1_002064;VLG3_000588;VLG6_001730;VLG1_001894;VLG12_0003…	1.3406
GO:0016491	oxidoreductase activity	MF	352/7692	840/24793	352/840	Leaf_vs_Stem	9.74274e-12	2.81728e-09	VLG1_000515;VLG7_000862;VLG6_001378;VLG6_001948;VLG3_000709;VLG9_000378;VLG10_001923;VLG6_000588;VLG8_002052;VLG3_001110;VLG1_001535;VLG1_000809;VLG8_001050;VLG6_001237;VLG3_001150;VLG10_000530;VLG5_002140;VLG9_001157;VLG7_001576;VLG10_000129;VLG6_001591;VLG1_002168;VLG6_001714;VLG7_000437;VLG6_001704;VLG1_001445;VLG6_000548;VLG6_001520;VLG1_001444;VLG10_000877;VLG3_001142;VLG7_000530;VLG5_001185…	1.37627
GO:0004497	monooxygenase activity	MF	117/7692	220/24793	117/220	Leaf_vs_Stem	8.29582e-12	2.50318e-09	VLG2_000600;VLG8_001919;VLG6_000470;VLG6_001948;VLG1_000308;VLG5_002141;VLG1_002243;VLG2_001899;VLG8_001803;VLG8_002052;VLG3_001110;VLG7_000188;VLG6_000473;VLG1_001535;VLG8_001805;VLG1_000809;VLG3_001330;VLG6_000593;VLG3_001152;VLG3_001150;VLG10_000530;VLG3_001424;VLG3_001064;VLG5_002140;VLG6_001337;VLG8_000690;VLG1_002168;VLG1_000780;VLG6_001714;VLG3_001147;VLG6_001704;VLG1_001445;VLG10_001315;V…	1.72723
ko380	Tryptophan metabolism	KEGG	45/7692	115/24793	45/115	Leaf_vs_Stem	0.00912483	0.049113	VLG9_000928;VLG2_002003;VLG1_001232;VLG12_000440;VLG6_001252;VLG2_001320;VLG8_001640;VLG2_001315;VLG5_002081;VLG4_001119;VLG6_001291;VLG2_001640;VLG2_001993;VLG6_001290;VLG4_001314;VLG3_000117;VLG2_001319;VLG2_002000;VLG6_001292;VLG12_000438;VLG12_001010;VLG2_001998;VLG6_001293;VLG12_000437;VLG7_001575;VLG6_001300;VLG2_001995;VLG2_001996;VLG8_000690;VLG9_001467;VLG9_001458;VLG6_001635;VLG6_001295…	1.38446
ko4016	MAPK signaling pathway - plant	KEGG	65/7692	174/24793	65/174	Leaf_vs_Stem	0.00711112	0.0394344	VLG6_000581;VLG2_001600;VLG7_001571;VLG1_001232;VLG9_000582;VLG2_002051;VLG8_000989;VLG3_000749;VLG3_000526;VLG2_000430;VLG7_000826;VLG3_000454;VLG9_001097;VLG5_002217;VLG7_001213;VLG6_000443;VLG4_001177;VLG12_001345;VLG8_000662;VLG2_002044;VLG9_001099;VLG2_002048;VLG3_000833;VLG6_001559;VLG8_001050;VLG6_001924;VLG3_000787;VLG8_001315;VLG6_000665;VLG11_001392;VLG3_001517;VLG9_001096;VLG5_000921;V…	1.32057
ko330	Arginine and proline metabolism	KEGG	37/7692	89/24793	37/89	Leaf_vs_Stem	0.00562455	0.0322955	VLG10_001693;VLG10_001696;VLG2_002003;VLG6_001252;VLG8_001093;VLG10_001156;VLG2_001993;VLG1_001208;VLG4_001314;VLG2_002000;VLG10_001697;VLG10_001695;VLG10_001157;VLG12_001010;VLG2_001998;VLG8_000911;VLG10_001700;VLG2_001995;VLG1_000159;VLG9_000689;VLG2_001996;VLG10_000577;VLG6_001635;VLG10_001689;VLG6_002065;VLG2_000292;VLG8_001958;VLG6_000842;VLG10_000667;VLG10_000670;VLG2_001997;VLG6_001895;VLG…	1.47222
ko1004	Lipid biosynthesis proteins	KEGG	45/7692	111/24793	45/111	Leaf_vs_Stem	0.00429666	0.0262096	VLG5_000995;VLG10_000326;VLG5_001377;VLG3_000993;VLG3_000189;VLG2_001855;VLG3_001413;VLG2_001124;VLG8_000610;VLG4_001265;VLG12_001582;VLG1_002165;VLG3_000190;VLG5_001289;VLG5_001147;VLG2_002184;VLG1_001633;VLG12_001613;VLG12_001039;VLG7_000897;VLG3_001561;VLG7_000903;VLG1_001632;VLG4_000133;VLG5_001146;VLG7_001794;VLG7_000908;VLG2_000611;VLG11_001532;VLG12_001741;VLG3_001122;VLG7_000905;VLG2_0018…	1.43467
ko4090	CD molecules	KEGG	19/7692	37/24793	19/37	Leaf_vs_Stem	0.00284573	0.0189925	VLG9_000230;VLG2_000700;VLG6_000233;VLG11_000985;VLG7_000088;VLG12_001999;VLG7_001707;VLG7_000815;VLG10_001788;VLG7_000576;VLG11_001601;VLG10_001758;VLG2_000701;VLG4_000144;VLG4_001212;VLG1_001184;VLG5_000563;VLG2_001150;VLG10_001226	1.82519
ko3110	Chaperones and folding catalysts	KEGG	110/7692	306/24793	110/306	Leaf_vs_Stem	0.00268857	0.0189925	VLG12_001385;VLG3_000779;VLG12_001408;VLG12_000699;VLG4_000125;VLG8_002273;VLG7_000026;VLG6_001672;VLG1_000725;VLG12_000696;VLG5_001526;VLG4_000416;VLG6_001175;VLG6_000708;VLG12_001667;VLG5_001344;VLG8_002037;VLG24_000011;VLG1_001222;VLG5_002047;VLG12_000337;VLG12_001666;VLG7_000127;VLG12_000693;VLG12_000473;VLG4_001259;VLG10_000771;VLG8_002190;VLG10_000372;VLG5_001100;VLG5_001667;VLG10_000690;VL…	1.27161
ko480	Glutathione metabolism	KEGG	46/7692	112/24793	46/112	Leaf_vs_Stem	0.00290595	0.0189925	VLG7_001177;VLG4_000269;VLG7_001180;VLG7_001184;VLG4_000312;VLG7_001179;VLG7_001175;VLG1_000679;VLG4_000267;VLG7_001176;VLG9_001406;VLG4_000843;VLG7_001178;VLG1_001211;VLG10_001897;VLG3_000753;VLG1_000366;VLG7_001183;VLG1_001208;VLG4_000270;VLG9_001104;VLG8_001294;VLG2_001051;VLG8_001516;VLG10_000442;VLG6_001602;VLG4_000848;VLG9_001408;VLG7_000102;VLG1_001788;VLG10_000999;VLG4_000272;VLG8_001303;…	1.45351
ko909	Sesquiterpenoid and triterpenoid biosynthesis	KEGG	28/7692	61/24793	28/61	Leaf_vs_Stem	0.00289985	0.0189925	VLG5_002137;VLG7_000185;VLG5_000702;VLG2_002016;VLG4_000910;VLG8_000176;VLG5_002141;VLG8_000177;VLG8_000432;VLG4_000905;VLG5_000703;VLG8_000173;VLG4_000907;VLG1_001491;VLG8_000174;VLG5_002140;VLG4_000912;VLG5_000705;VLG4_000904;VLG5_000696;VLG4_000908;VLG2_002015;VLG10_001393;VLG5_002139;VLG6_001856;VLG4_000909;VLG3_001767;VLG10_001395	1.62774
ko860	Porphyrin and chlorophyll metabolism	KEGG	29/7692	63/24793	29/63	Leaf_vs_Stem	0.00233445	0.0178663	VLG10_000354;VLG1_000515;VLG2_000943;VLG7_000991;VLG10_000186;VLG2_000942;VLG5_000018;VLG12_002049;VLG12_002057;VLG3_000210;VLG8_001063;VLG7_001546;VLG8_002124;VLG6_000747;VLG9_001191;VLG12_000304;VLG12_002041;VLG7_001576;VLG12_002055;VLG12_001662;VLG1_002168;VLG10_000185;VLG1_001128;VLG5_001505;VLG11_000567;VLG12_000385;VLG9_000729;VLG9_001410;VLG2_000944	1.63202
ko500	Starch and sucrose metabolism	KEGG	91/7692	246/24793	91/246	Leaf_vs_Stem	0.00234313	0.0178663	VLG5_000278;VLG2_001282;VLG11_000672;VLG11_000019;VLG4_000461;VLG6_000222;VLG4_000889;VLG5_001706;VLG1_001375;VLG12_001325;VLG5_000287;VLG10_000573;VLG5_002030;VLG10_000574;VLG11_000670;VLG12_002144;VLG12_001322;VLG6_000988;VLG11_000142;VLG5_000541;VLG5_001711;VLG8_000753;VLG5_001454;VLG5_000276;VLG2_001274;VLG1_001312;VLG1_000644;VLG10_000503;VLG5_000284;VLG10_000255;VLG2_001278;VLG10_001707;VLG…	1.30838
ko943	Isoflavonoid biosynthesis	KEGG	24/7692	47/24793	24/47	Leaf_vs_Stem	0.000924551	0.00769058	VLG6_001706;VLG9_000643;VLG6_001702;VLG6_001710;VLG2_000091;VLG1_001054;VLG7_000188;VLG6_001713;VLG12_000600;VLG6_001703;VLG10_001213;VLG10_000577;VLG6_001714;VLG6_001705;VLG10_000729;VLG6_001704;VLG1_001445;VLG6_001707;VLG2_000090;VLG1_001444;VLG6_000856;VLG10_000726;VLG10_001214;VLG10_001203	1.8117
ko902	Monoterpenoid biosynthesis	KEGG	26/7692	52/24793	26/52	Leaf_vs_Stem	0.000865937	0.00754602	VLG7_000346;VLG5_000702;VLG7_000975;VLG7_000348;VLG12_000430;VLG7_001120;VLG3_000604;VLG7_000977;VLG7_000347;VLG2_000476;VLG7_000968;VLG5_000703;VLG3_000607;VLG7_000976;VLG7_000350;VLG7_000978;VLG5_000705;VLG9_000041;VLG7_000967;VLG10_001393;VLG4_000735;VLG7_000970;VLG12_000432;VLG7_000349;VLG4_000755;VLG10_001395	1.7733
ko4075	Plant hormone signal transduction	KEGG	101/7692	268/24793	101/268	Leaf_vs_Stem	0.000679515	0.00621756	VLG12_001182;VLG12_001480;VLG4_000485;VLG12_001245;VLG3_000642;VLG2_002044;VLG4_000555;VLG12_000874;VLG2_001646;VLG7_001589;VLG1_002173;VLG10_000760;VLG2_001417;VLG9_000961;VLG10_000763;VLG7_001712;VLG6_000903;VLG11_001886;VLG8_001907;VLG8_002107;VLG1_001394;VLG5_000506;VLG8_002106;VLG3_000180;VLG8_000320;VLG5_000997;VLG2_002042;VLG7_001711;VLG2_002051;VLG10_000839;VLG6_001799;VLG1_001882;VLG7_00…	1.33415
ko52	Galactose metabolism	KEGG	31/7692	64/24793	31/64	Leaf_vs_Stem	0.000580629	0.00559237	VLG4_000901;VLG2_001128;VLG8_001250;VLG4_000902;VLG5_001406;VLG1_001170;VLG5_001456;VLG7_001834;VLG10_001848;VLG5_001924;VLG4_000189;VLG3_000639;VLG9_000868;VLG2_001121;VLG12_002183;VLG8_001270;VLG11_000670;VLG5_002109;VLG8_001621;VLG3_001786;VLG9_001804;VLG3_000840;VLG3_001476;VLG1_001400;VLG9_000869;VLG8_001659;VLG5_001454;VLG5_001455;VLG7_000733;VLG10_000203;VLG5_000166	1.71662
ko99980	Enzymes with EC numbers	KEGG	147/7692	408/24793	147/408	Leaf_vs_Stem	0.000515224	0.00523811	VLG6_000018;VLG6_000995;VLG11_000738;VLG6_001548;VLG5_000278;VLG6_001378;VLG8_000679;VLG12_001182;VLG8_000830;VLG12_001228;VLG12_001245;VLG11_001143;VLG3_001432;VLG5_001289;VLG9_000629;VLG8_001803;VLG10_000322;VLG9_001737;VLG4_000336;VLG8_001805;VLG5_000287;VLG10_000983;VLG2_000938;VLG9_000231;VLG7_001230;VLG5_002030;VLG11_001148;VLG10_000760;VLG8_001151;VLG11_001913;VLG2_001624;VLG10_000763;VLG1…	1.27711
ko460	Cyanoamino acid metabolism	KEGG	68/7692	165/24793	68/165	Leaf_vs_Stem	0.000303502	0.00326711	VLG5_001700;VLG5_000278;VLG7_000946;VLG5_000276;VLG2_001282;VLG2_001274;VLG12_001319;VLG2_001277;VLG12_000328;VLG6_000291;VLG5_000284;VLG3_000088;VLG5_000289;VLG12_001318;VLG8_001442;VLG2_001279;VLG8_001441;VLG8_000407;VLG4_000889;VLG12_000491;VLG5_000283;VLG5_001706;VLG6_000529;VLG2_001278;VLG8_000419;VLG4_000892;VLG8_000420;VLG12_001325;VLG5_000287;VLG12_000327;VLG12_001329;VLG12_001327;VLG5_00…	1.45887
ko904	Diterpenoid biosynthesis	KEGG	20/7692	33/24793	20/33	Leaf_vs_Stem	0.000121306	0.00138744	VLG5_001591;VLG7_000428;VLG1_000308;VLG7_000511;VLG5_001593;VLG3_000903;VLG1_000809;VLG2_001374;VLG8_000162;VLG7_001391;VLG7_000656;VLG2_001127;VLG6_001941;VLG5_001004;VLG5_001675;VLG9_000865;VLG10_000637;VLG4_000745;VLG5_002246;VLG2_001589	2.14941
ko592	alpha-Linolenic acid metabolism	KEGG	36/7692	70/24793	36/70	Leaf_vs_Stem	4.44e-05	0.000541781	VLG2_000600;VLG10_001300;VLG1_000747;VLG3_001428;VLG1_002276;VLG2_001769;VLG9_001151;VLG12_001585;VLG12_001586;VLG10_001301;VLG1_002275;VLG3_001432;VLG5_000239;VLG12_001030;VLG1_001916;VLG1_000746;VLG2_000654;VLG1_002277;VLG6_001083;VLG1_002266;VLG6_001237;VLG10_000530;VLG8_000155;VLG6_001654;VLG3_001431;VLG3_001433;VLG8_001518;VLG11_001913;VLG4_000095;VLG6_001236;VLG6_001238;VLG12_001032;VLG1_00…	1.8218
ko710	Carbon fixation in photosynthetic organisms	KEGG	34/7692	64/24793	34/64	Leaf_vs_Stem	3e-05	0.000392206	VLG2_000683;VLG11_001469;VLG8_002333;VLG3_001451;VLG6_000846;VLG7_001484;VLG9_000693;VLG6_000300;VLG8_001322;VLG10_001003;VLG12_001207;VLG3_000006;VLG4_001367;VLG1_000159;VLG1_000514;VLG1_002303;VLG3_000007;VLG8_000528;VLG8_000540;VLG12_001488;VLG19_000001;VLG24_000024;VLG4_000918;VLG5_000386;VLG9_000504;VLG8_001064;VLG2_000364;VLG4_001475;VLG2_000351;VLG11_000184;VLG4_000524;VLG2_000002;VLG4_000…	1.88198
ko941	Flavonoid biosynthesis	KEGG	58/7692	126/24793	58/126	Leaf_vs_Stem	2.11e-05	0.000297449	VLG9_001460;VLG1_000750;VLG4_000119;VLG4_001406;VLG4_001378;VLG4_000657;VLG11_001835;VLG4_001509;VLG8_001879;VLG11_001885;VLG6_000621;VLG12_000349;VLG1_000711;VLG11_001599;VLG9_000330;VLG8_002035;VLG12_002235;VLG4_001511;VLG11_001596;VLG11_001777;VLG3_000181;VLG4_001430;VLG4_001510;VLG4_001502;VLG11_001597;VLG11_000510;VLG1_002143;VLG4_001508;VLG11_001598;VLG8_002034;VLG3_000182;VLG1_001693;VLG9_…	1.63059
ko905	Brassinosteroid biosynthesis	KEGG	27/7692	44/24793	27/44	Leaf_vs_Stem	5.72e-06	0.000110867	VLG6_001706;VLG6_001702;VLG6_001710;VLG1_001054;VLG9_001479;VLG5_000240;VLG6_001713;VLG6_000593;VLG3_001425;VLG3_001424;VLG6_001703;VLG6_001714;VLG6_001705;VLG6_001704;VLG1_001445;VLG6_001707;VLG6_000548;VLG1_001444;VLG11_000518;VLG4_001286;VLG10_000286;VLG4_001282;VLG10_000411;VLG7_001856;VLG1_001443;VLG6_001013;VLG9_001480	2.1734
[truncated: 270 more rows]

## Sheet: S1-4 genome list
Table S1-4. Summary of genomic data utilized for comparative genomic analyses between V. leiocarpa and its related species.
[truncated: 13 more rows]
